# Supplementary material for: Genome-wide determination of on-target and off-target characteristics for RNA-guided DNA methylation by dCas9 methyltransferases
Source: Oxford University Press journal article supplement (doi:10.1093/gigascience/giy011), 2018-02-19
Supplement: giy011_giga-d-17-00040_original_submission.pdf [file giy011_giga-d-17-00040_original_submission.pdf]

## Genome wide determination of on-target and off-target characteristics for RNA-guided DNA Methylation by dCas9 methyltransferases (CRISPRme) --Manuscript Draft--

|                              |                                                                                                                                                                                                                                                                                                                                                                                                                                                                                                                                                                                                                                                                                                                                                                                                                                                                                                                                                                                                                                                                                                                                                                                                                                                                                                                                                                                                                                                                                                                                                                                                                                                                                                                                                                                                                                                                                                                                                                                                                                                                                                                                                                                                                                                                           |                           |
|------------------------------|---------------------------------------------------------------------------------------------------------------------------------------------------------------------------------------------------------------------------------------------------------------------------------------------------------------------------------------------------------------------------------------------------------------------------------------------------------------------------------------------------------------------------------------------------------------------------------------------------------------------------------------------------------------------------------------------------------------------------------------------------------------------------------------------------------------------------------------------------------------------------------------------------------------------------------------------------------------------------------------------------------------------------------------------------------------------------------------------------------------------------------------------------------------------------------------------------------------------------------------------------------------------------------------------------------------------------------------------------------------------------------------------------------------------------------------------------------------------------------------------------------------------------------------------------------------------------------------------------------------------------------------------------------------------------------------------------------------------------------------------------------------------------------------------------------------------------------------------------------------------------------------------------------------------------------------------------------------------------------------------------------------------------------------------------------------------------------------------------------------------------------------------------------------------------------------------------------------------------------------------------------------------------|---------------------------|
| <b>Manuscript Number:</b>    | GIGA-D-17-00040                                                                                                                                                                                                                                                                                                                                                                                                                                                                                                                                                                                                                                                                                                                                                                                                                                                                                                                                                                                                                                                                                                                                                                                                                                                                                                                                                                                                                                                                                                                                                                                                                                                                                                                                                                                                                                                                                                                                                                                                                                                                                                                                                                                                                                                           |                           |
| <b>Full Title:</b>           | Genome wide determination of on-target and off-target characteristics for RNA-guided DNA Methylation by dCas9 methyltransferases (CRISPRme)                                                                                                                                                                                                                                                                                                                                                                                                                                                                                                                                                                                                                                                                                                                                                                                                                                                                                                                                                                                                                                                                                                                                                                                                                                                                                                                                                                                                                                                                                                                                                                                                                                                                                                                                                                                                                                                                                                                                                                                                                                                                                                                               |                           |
| <b>Article Type:</b>         | Research                                                                                                                                                                                                                                                                                                                                                                                                                                                                                                                                                                                                                                                                                                                                                                                                                                                                                                                                                                                                                                                                                                                                                                                                                                                                                                                                                                                                                                                                                                                                                                                                                                                                                                                                                                                                                                                                                                                                                                                                                                                                                                                                                                                                                                                                  |                           |
| <b>Funding Information:</b>  | Teknologi og Produktion, Det Frie Forskningsråd (DFF-1337-00128)                                                                                                                                                                                                                                                                                                                                                                                                                                                                                                                                                                                                                                                                                                                                                                                                                                                                                                                                                                                                                                                                                                                                                                                                                                                                                                                                                                                                                                                                                                                                                                                                                                                                                                                                                                                                                                                                                                                                                                                                                                                                                                                                                                                                          | Prof. Yonglun Luo         |
|                              | Teknologi og Produktion, Det Frie Forskningsråd (DFF-1335-00763A)                                                                                                                                                                                                                                                                                                                                                                                                                                                                                                                                                                                                                                                                                                                                                                                                                                                                                                                                                                                                                                                                                                                                                                                                                                                                                                                                                                                                                                                                                                                                                                                                                                                                                                                                                                                                                                                                                                                                                                                                                                                                                                                                                                                                         | Prof. Yonglun Luo         |
|                              | Innovation Fund Denmark (BrainStem)                                                                                                                                                                                                                                                                                                                                                                                                                                                                                                                                                                                                                                                                                                                                                                                                                                                                                                                                                                                                                                                                                                                                                                                                                                                                                                                                                                                                                                                                                                                                                                                                                                                                                                                                                                                                                                                                                                                                                                                                                                                                                                                                                                                                                                       | Prof. Yonglun Luo         |
|                              | Lundbeckfonden (R173-2014-1105)                                                                                                                                                                                                                                                                                                                                                                                                                                                                                                                                                                                                                                                                                                                                                                                                                                                                                                                                                                                                                                                                                                                                                                                                                                                                                                                                                                                                                                                                                                                                                                                                                                                                                                                                                                                                                                                                                                                                                                                                                                                                                                                                                                                                                                           | Prof. Yonglun Luo         |
|                              | Lundbeckfonden (R151-2013-14439)                                                                                                                                                                                                                                                                                                                                                                                                                                                                                                                                                                                                                                                                                                                                                                                                                                                                                                                                                                                                                                                                                                                                                                                                                                                                                                                                                                                                                                                                                                                                                                                                                                                                                                                                                                                                                                                                                                                                                                                                                                                                                                                                                                                                                                          | Prof. Lars Bolund         |
|                              | Lundbeckfonden (R219-2016-1375)                                                                                                                                                                                                                                                                                                                                                                                                                                                                                                                                                                                                                                                                                                                                                                                                                                                                                                                                                                                                                                                                                                                                                                                                                                                                                                                                                                                                                                                                                                                                                                                                                                                                                                                                                                                                                                                                                                                                                                                                                                                                                                                                                                                                                                           | Dr. Lin Lin               |
|                              | Toyota Foundation (JP)                                                                                                                                                                                                                                                                                                                                                                                                                                                                                                                                                                                                                                                                                                                                                                                                                                                                                                                                                                                                                                                                                                                                                                                                                                                                                                                                                                                                                                                                                                                                                                                                                                                                                                                                                                                                                                                                                                                                                                                                                                                                                                                                                                                                                                                    | Prof. Anders Lade Nielsen |
|                              | Lundbeckfonden                                                                                                                                                                                                                                                                                                                                                                                                                                                                                                                                                                                                                                                                                                                                                                                                                                                                                                                                                                                                                                                                                                                                                                                                                                                                                                                                                                                                                                                                                                                                                                                                                                                                                                                                                                                                                                                                                                                                                                                                                                                                                                                                                                                                                                                            | Prof. Anders Lade Nielsen |
| <b>Abstract:</b>             | <p><b>Background</b><br/>Fusion of active protein domains to the nuclease-deficient clustered regularly interspaced short palindromic repeat (CRISPR) associated protein 9 (dCas9) has been used for epigenome editing, but the specificities of these engineered proteins have still not been fully investigated.</p> <p><b>Findings</b><br/>In this study, we generated a CRISPR-guided DNA methyltransferases (CRISPRme) by fusing the catalytic domain of DNMT3A or DNMT3B to the C terminus of the dCas9 protein from <i>S. pyogenes</i> and validated its on-target and global off-target characteristics. Using targeted quantitative bisulfite pyrosequencing, we prove that CRISPRme can efficiently methylate the CpG dinucleotides flanking its target sites in genomic loci (uPA and TGFBR3) in human cells (HEK293T) with de novo CpG-methylation levels exceeding 70% for some target sites. Furthermore, we conducted whole genome bisulfite sequencing to address the specificity of dCas9 methyltransferases. Whole genome bisulfite sequencing revealed that although CRISPRme did not cause global methylation changes, a substantial amount of off-target differentially methylated regions were identified in cells overexpressing CRISPRme and gRNAs. These off-target differentially methylated regions were predominantly found in promoter regions, 5' un-translated regions, CpG islands, and DNase I hypersensitivity sites. Through chromatin immunoprecipitation with massive parallel DNA sequencing analysis, we further revealed that these off-target DMRs were weakly correlated with dCas9 off-target binding sites. Using qPCR, fluorescent reporter cells and RNA sequencing, we also found that CRISPRme can mediate transient inhibition of gene expression. However, this effect appears to result from dCas9-mediated interference with transcription rather than de novo DNA methylation of the promoter investigated.</p> <p><b>Conclusion</b><br/>Our results prove that CRISPRme allows for efficient RNA-guided methylation of endogenous CpGs. Still there is significant off-target methylation indicating that further improvements of the specificity of CRISPR-dCas9 based DNA methylation modifiers are required.</p> |                           |
| <b>Corresponding Author:</b> | Yonglun Luo                                                                                                                                                                                                                                                                                                                                                                                                                                                                                                                                                                                                                                                                                                                                                                                                                                                                                                                                                                                                                                                                                                                                                                                                                                                                                                                                                                                                                                                                                                                                                                                                                                                                                                                                                                                                                                                                                                                                                                                                                                                                                                                                                                                                                                                               |                           |

|                                                                                                                                                                                                                                                                                                  |                                              |
|--------------------------------------------------------------------------------------------------------------------------------------------------------------------------------------------------------------------------------------------------------------------------------------------------|----------------------------------------------|
|                                                                                                                                                                                                                                                                                                  | Aarhus Universitet Health<br>Aarhus, DENMARK |
| <b>Corresponding Author Secondary Information:</b>                                                                                                                                                                                                                                               |                                              |
| <b>Corresponding Author's Institution:</b>                                                                                                                                                                                                                                                       | Aarhus Universitet Health                    |
| <b>Corresponding Author's Secondary Institution:</b>                                                                                                                                                                                                                                             |                                              |
| <b>First Author:</b>                                                                                                                                                                                                                                                                             | Lin Lin                                      |
| <b>First Author Secondary Information:</b>                                                                                                                                                                                                                                                       |                                              |
| <b>Order of Authors:</b>                                                                                                                                                                                                                                                                         | Lin Lin                                      |
|                                                                                                                                                                                                                                                                                                  | Yong Liu                                     |
|                                                                                                                                                                                                                                                                                                  | Jingrong Huang                               |
|                                                                                                                                                                                                                                                                                                  | Fengping Xu                                  |
|                                                                                                                                                                                                                                                                                                  | Tina Fuglsang Daugaard                       |
|                                                                                                                                                                                                                                                                                                  | Trine Skov Petersen                          |
|                                                                                                                                                                                                                                                                                                  | Bettina Hansen                               |
|                                                                                                                                                                                                                                                                                                  | Lingfei ye                                   |
|                                                                                                                                                                                                                                                                                                  | Qing Zhou                                    |
|                                                                                                                                                                                                                                                                                                  | Fang Fang                                    |
|                                                                                                                                                                                                                                                                                                  | Shengting Li                                 |
|                                                                                                                                                                                                                                                                                                  | Lasse Fløe                                   |
|                                                                                                                                                                                                                                                                                                  | Kristopher Torp Jensen                       |
|                                                                                                                                                                                                                                                                                                  | Ellen Shrock                                 |
|                                                                                                                                                                                                                                                                                                  | Huanming Yang                                |
|                                                                                                                                                                                                                                                                                                  | Jian Wang                                    |
|                                                                                                                                                                                                                                                                                                  | Xun Xu                                       |
|                                                                                                                                                                                                                                                                                                  | Lars Bolund                                  |
|                                                                                                                                                                                                                                                                                                  | Anders Lade Nielsen                          |
|                                                                                                                                                                                                                                                                                                  | Yonglun Luo                                  |
| <b>Order of Authors Secondary Information:</b>                                                                                                                                                                                                                                                   |                                              |
| <b>Opposed Reviewers:</b>                                                                                                                                                                                                                                                                        |                                              |
| <b>Additional Information:</b>                                                                                                                                                                                                                                                                   |                                              |
| <b>Question</b>                                                                                                                                                                                                                                                                                  | <b>Response</b>                              |
| Are you submitting this manuscript to a special series or article collection?                                                                                                                                                                                                                    | No                                           |
| <b>Experimental design and statistics</b>                                                                                                                                                                                                                                                        | Yes                                          |
| Full details of the experimental design and statistical methods used should be given in the Methods section, as detailed in our <a href="#">Minimum Standards Reporting Checklist</a> . Information essential to interpreting the data presented should be made available in the figure legends. |                                              |

|                                                                                                                                                                                                                                                                                                                                                                                                                                                                                                                                                         |            |
|---------------------------------------------------------------------------------------------------------------------------------------------------------------------------------------------------------------------------------------------------------------------------------------------------------------------------------------------------------------------------------------------------------------------------------------------------------------------------------------------------------------------------------------------------------|------------|
| <p>Have you included all the information requested in your manuscript?</p>                                                                                                                                                                                                                                                                                                                                                                                                                                                                              |            |
| <p><b>Resources</b></p> <p>A description of all resources used, including antibodies, cell lines, animals and software tools, with enough information to allow them to be uniquely identified, should be included in the Methods section. Authors are strongly encouraged to cite <a href="#">Research Resource Identifiers</a> (RRIDs) for antibodies, model organisms and tools, where possible.</p> <p>Have you included the information requested as detailed in our <a href="#">Minimum Standards Reporting Checklist</a>?</p>                     | <p>Yes</p> |
| <p><b>Availability of data and materials</b></p> <p>All datasets and code on which the conclusions of the paper rely must be either included in your submission or deposited in <a href="#">publicly available repositories</a> (where available and ethically appropriate), referencing such data using a unique identifier in the references and in the “Availability of Data and Materials” section of your manuscript.</p> <p>Have you have met the above requirement as detailed in our <a href="#">Minimum Standards Reporting Checklist</a>?</p> | <p>Yes</p> |

1  
2  
3  
4 **1 Genome wide determination of on-target and off-target characteristics for RNA-guided**  
5 **2 DNA Methylation by dCas9 methyltransferases (CRISPRme)**  
6  
7  
8

9 4 Lin Lin <sup>1, 7, §</sup>, Yong Liu <sup>1, §</sup>, Jinrong Huang <sup>2, 3, §</sup>, Fengping Xu <sup>2, 3, 4, §</sup>, Tina Fuglsang Daugaard <sup>1</sup>,  
10 5 Trine Skov Petersen <sup>1</sup>, Bettina Hansen <sup>1</sup>, Lingfei Ye <sup>2</sup>, Qing Zhou <sup>2, 3</sup>, Fang Fang <sup>2, 3</sup>, Shengting Li  
11 6 <sup>1, 2</sup>, Lasse Fløe <sup>1</sup>, Kristopher Torp Jensen <sup>1</sup>, Ellen Shrock <sup>6</sup>, Huanming Yang <sup>2, 4</sup>, Jian Wang <sup>2, 4</sup>,  
12 7 Xun Xu <sup>2, 3, \*</sup>, Lars Bolund <sup>1, 2, 7</sup>, Anders Lade Nielsen <sup>1</sup>, Yonglun Luo <sup>1, 7, 8 \*</sup>  
13  
14  
15

16 8  
17 9 Initials for authors:

18 10 L.L., Y.Liu., F.X., J.H., T.F.D., T.S.P., B.H., L.Y., Q.Z., F.F., S.L., L.F., E.S., H.Y., J.W., X.X., L.B.,  
19 11 A.L.N., Y.L.  
20  
21

22 12  
23 13 Affiliations for authors:

- 24 14 1. Department of Biomedicine, Aarhus University, Aarhus, Denmark  
25 15 2. BGI-Shenzhen, Shenzhen 518083, China  
26 16 3. China National GeneBank-Shenzhen, BGI-Shenzhen, Shenzhen 518083, China  
27 17 4. Department of Biology, University of Copenhagen, Copenhagen, Denmark  
28 18 5. James D. Watson Institute of Genome Sciences, Hangzhou 310058, China  
29 19 6. Department of Genetics, Harvard Medical School, Boston, MA, USA.  
30 20 7. Danish Regenerative Engineering Alliance for Medicine (DREAM), Department of Biomedicine,  
31 21 Aarhus University, Aarhus, Denmark  
32 22 8. BrainStem - Stem Cell Center of Excellence in Neurology, Copenhagen, Denmark  
33 23 §. These authors contributed equally to the study  
34 24 \* . All correspondence should be addressed to Xun Xu ([XUXUN@GENOMICS.CN](mailto:XUXUN@GENOMICS.CN)) and Yonglun  
35 25 Luo ([ALUN@BIOMED.AU.DK](mailto:ALUN@BIOMED.AU.DK))  
36  
37  
38  
39  
40  
41  
42  
43

44 27 **Emails:**

45 28 Lin Lin: [lin.lin@biomed.au.dk](mailto:lin.lin@biomed.au.dk)  
46 29 Yong Liu: [liyongbox@gmail.com](mailto:liyongbox@gmail.com)  
47 30 Jinrong Huang: [huangjinrong@genomics.cn](mailto:huangjinrong@genomics.cn)  
48 31 Fengping Xu: [xufengping@genomics.cn](mailto:xufengping@genomics.cn)  
49 32 Tina Fuglsang Daugaard: [tfm@biomed.au.dk](mailto:tfm@biomed.au.dk)  
50 33 Trine Skov Petersen: [trinesp@biomed.au.dk](mailto:trinesp@biomed.au.dk)  
51 34 Bettina Hansen: [bhansen@biomed.au.dk](mailto:bhansen@biomed.au.dk)  
52 35 Lingfei Ye: [yelingfei@genomics.cn](mailto:yelingfei@genomics.cn)  
53  
54  
55  
56  
57  
58  
59  
60  
61  
62  
63  
64  
65

1  
2  
3  
4 36 Qing Zhou: [zhouqing1@genomics.cn](mailto:zhouqing1@genomics.cn)  
5 37 Fang Fang: [fangfang@genomics.org.cn](mailto:fangfang@genomics.org.cn)  
6 38 Shengting Li: [lishengting@gmail.com](mailto:lishengting@gmail.com)  
7 39 Lasse Fløe: [lassefloe@gmail.com](mailto:lassefloe@gmail.com)  
8 40 Kristopher Torp Jensen: [kristopher.torp@gmail.com](mailto:kristopher.torp@gmail.com)  
9 41 Ellen Shrock: [ellen\\_shrock@g.harvard.edu](mailto:ellen_shrock@g.harvard.edu)  
10 42 Huanming Yang: [yanghm@genomics.cn](mailto:yanghm@genomics.cn)  
11 43 Jian Wang: [wangjian@genomics.cn](mailto:wangjian@genomics.cn)  
12 44 Xun Xu: [xuxun@genomics.cn](mailto:xuxun@genomics.cn)  
13 45 Lars Bolund: [bolund@biomed.au.dk](mailto:bolund@biomed.au.dk)  
14 46 Anders Lade Nielsen: [aln@biomed.au.dk](mailto:aln@biomed.au.dk)  
15 47 Yonglun Luo: [alun@biomed.au.dk](mailto:alun@biomed.au.dk)  
16 48  
17  
18  
19  
20  
21  
22  
23  
24  
25  
26  
27  
28  
29  
30  
31  
32  
33  
34  
35  
36  
37  
38  
39  
40  
41  
42  
43  
44  
45  
46  
47  
48  
49  
50  
51  
52  
53  
54  
55  
56  
57  
58  
59  
60  
61  
62  
63  
64  
65

1  
2  
3  
4  
5  
6  
7  
8  
9  
10  
11  
12  
13  
14  
15  
16  
17  
18  
19  
20  
21  
22  
23  
24  
25  
26  
27  
28  
29  
30  
31  
32  
33  
34  
35  
36  
37  
38  
39  
40  
41  
42  
43  
44  
45  
46  
47  
48  
49  
50  
51  
52  
53  
54  
55  
56  
57  
58  
59  
60  
61  
62  
63  
64  
65

50  
51

### Graphical Abstract

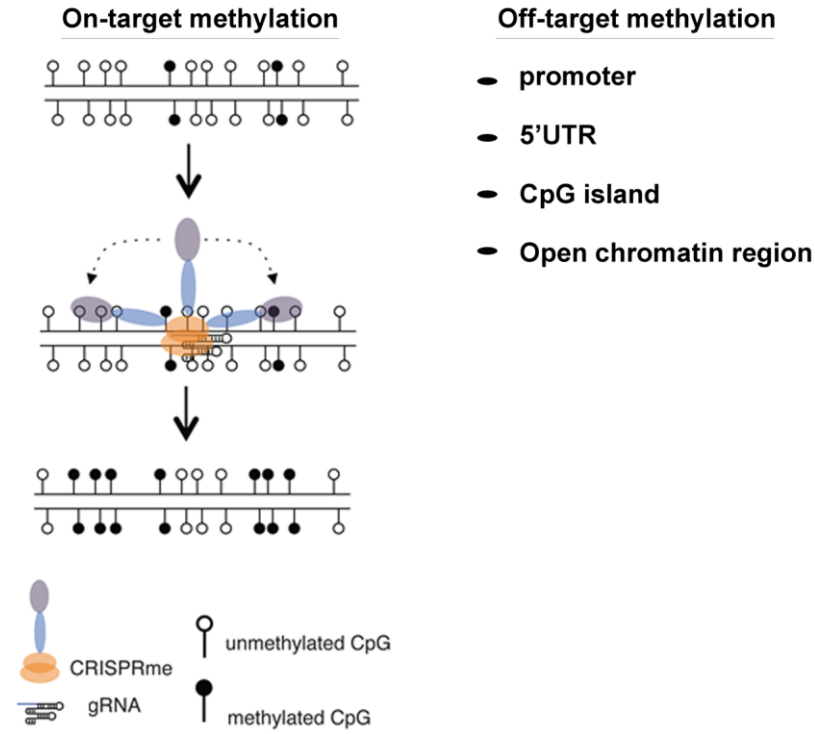

52

1  
2  
3  
4  
5  
6  
7  
8  
9  
10  
11  
12  
13  
14  
15  
16  
17  
18  
19  
20  
21  
22  
23  
24  
25  
26  
27  
28  
29  
30  
31  
32  
33  
34  
35  
36  
37  
38  
39  
40  
41  
42  
43  
44  
45  
46  
47  
48  
49  
50  
51  
52  
53  
54  
55  
56  
57  
58  
59  
60  
61  
62  
63  
64  
65

53 **Abstract**

54 **Background**

55 Fusion of active protein domains to the nuclease-deficient clustered regularly interspaced short  
56 palindromic repeat (CRISPR) associated protein 9 (dCas9) has been used for epigenome editing,  
57 but the specificities of these engineered proteins have still not been fully investigated.

58  
59 **Findings**

60 In this study, we generated a CRISPR-guided DNA methyltransferases (CRISPRme) by fusing  
61 the catalytic domain of DNMT3A or DNMT3B to the C terminus of the dCas9 protein from *S.*  
62 *pyogenes* and validated its on-target and global off-target characteristics. Using targeted  
63 quantitative bisulfite pyrosequencing, we prove that CRISPRme can efficiently methylate the CpG  
64 dinucleotides flanking its target sites in genomic loci (*uPA* and *TGFBR3*) in human cells  
65 (HEK293T) with *de novo* CpG-methylation levels exceeding 70% for some target sites.  
66 Furthermore, we conducted whole genome bisulfite sequencing to address the specificity of  
67 dCas9 methyltransferases. Whole genome bisulfite sequencing revealed that although  
68 CRISPRme did not cause global methylation changes, a substantial amount of off-target  
69 differentially methylated regions were identified in cells overexpressing CRISPRme and gRNAs.  
70 These off-target differentially methylated regions were predominantly found in promoter regions,  
71 5' un-translated regions, CpG islands, and DNase I hypersensitivity sites. Through chromatin  
72 immunoprecipitation with massive parallel DNA sequencing analysis, we further revealed that  
73 these off-target DMRs were weakly correlated with dCas9 off-target binding sites. Using qPCR,  
74 fluorescent reporter cells and RNA sequencing, we also found that CRISPRme can mediate  
75 transient inhibition of gene expression. However, this effect appears to result from dCas9-  
76 mediated interference with transcription rather than *de novo* DNA methylation of the promoter  
77 investigated.

78  
79 **Conclusion**

80 Our results prove that CRISPRme allows for efficient RNA-guided methylation of endogenous  
81 CpGs. Still there is significant off-target methylation indicating that further improvements of the  
82 specificity of CRISPR-dCas9 based DNA methylation modifiers are required.

83  
84 **Key words**

85 DNA methylation – CRISPR – Cas9 – DNMT3A – DNMT3B – dCas9 – specificity – off-targets –  
86 genome wide

1  
2  
3  
4  
5  
6  
7  
8  
9  
10  
11  
12  
13  
14  
15  
16  
17  
18  
19  
20  
21  
22  
23  
24  
25  
26  
27  
28  
29  
30  
31  
32  
33  
34  
35  
36  
37  
38  
39  
40  
41  
42  
43  
44  
45  
46  
47  
48  
49  
50  
51  
52  
53  
54  
55  
56  
57  
58  
59  
60  
61  
62  
63  
64  
65

89 **Background**

90 Owing to its simplicity, efficiency and potential for multiplicity, the type II Clustered Regularly  
91 Interspaced Short Palindromic Repeats (CRISPR) and CRISPR-associated protein 9 (Cas9)  
92 along with engineered variants have been widely used for genome and epigenome editing across  
93 many species [1-5]. The Cas9 protein is guided to a specific genomic locus containing a  
94 protospacer adjacent motif (PAM) by a small single guide RNA (gRNA), which contains  
95 programmable guide sequences (typically 20 nt) and a conserved scaffold sequence [1]. By  
96 introducing double mutations (D10A and H840A) to the SpCas9 protein (dCas9) to inactivate its  
97 catalytic activity and fusing functional effectors to the C terminus of dCas9, the applications of  
98 CRISPR/Cas9 are expanded to regulation of gene expression (CRISPRa and CRISPRi) [6-8],  
99 targeted DNA purification [9], visualization of specific gene regions [10], and acetylation or  
100 methylation of chromatin components [11, 12].

101

102 Genome-wide studies have revealed fundamental functional roles of DNA methylation as well as  
103 associations between aberrant DNA methylation and human diseases including cancer [13, 14].  
104 Methylation of cytosine residues (5mC) in the mammalian genome mainly occurs at CpG  
105 dinucleotides and is normally associated with repression of gene expression in promoter regions.  
106 Currently, insights into DNA methylation-associated biological processes are largely based on  
107 correlative data. Methods have been developed to methylate desired gene loci selectively by  
108 fusing programmable DNA binding proteins (zinc finger proteins (ZFs) or transcription-activator-  
109 like effectors (TALEs)) to DNA methyltransferases<sup>3-9</sup>. However, the laborious generation of ZFs-  
110 and TALEs hampers their broader applications. Due to its simplicity and programmability,  
111 engineering *S. pyogenes* dCas9 for targeted DNA methylation by fusing dCas9 to the catalytic  
112 domain of mammalian DNA methyltransferases has the potential to provide a tool for easily  
113 programmable DNA methylation [15, 16].

114

115 Currently, genome-wide characterization of the specificity of dCas9-based epigenetic modifiers is  
116 still lacking. To gain more insights into the efficiency and specificity of targeted DNA methylation  
117 by CRISPR gRNA-guided dCas9 methyltransferases (hereafter denoted CRISPRme), we used  
118 quantitative bisulfite pyrosequencing, whole genome bisulfite sequencing, and ChIP-seq to  
119 investigate the characteristics of CRISPRme-mediated DNA methylation in human cells.

120

121



1  
2  
3  
4  
5  
6  
7  
8  
9  
10  
11  
12  
13  
14  
15  
16  
17  
18  
19  
20  
21  
22  
23  
24  
25  
26  
27  
28  
29  
30  
31  
32  
33  
34  
35  
36  
37  
38  
39  
40  
41  
42  
43  
44  
45  
46  
47  
48  
49  
50  
51  
52  
53  
54  
55  
56  
57  
58  
59  
60  
61  
62  
63  
64  
65

122 **Methods**

123 **Cell Culture**

124 Human embryonic kidney HEK293T cells (ATCC) were cultured in Dulbecco's modified Eagle's  
125 medium (DMEM, Life Technologies), 10% fetal bovine serum (Sigma), 1% penicillin-streptomycin  
126 (Sigma), 1X GlutaMAX (Life Technologies) at 37 degree, 5% CO2.

128 **CRISPRme plasmids**

129 The dCas9 coding sequence was derived from pHR-SFFV-dCas9-BFP-KRAB (Addgene ID  
130 46911) (a gift from Stanley Qi & Jonathan Weissman). The catalytic domains of DNMT1,  
131 DNMT3A and DNMT3B were PCR-amplified from pcDNA3/Myc-DNMT1 (Addgene ID 36939),  
132 pcDNA3/Myc-DNMT3A (Addgene ID 35521) and pcDNA3/Myc-DNMT3B1 (Addgene ID 35522) (a  
133 gift from Arthur Riggs), respectively. The DNMT3A (E752A) and DNMT3B (E697A) catalytically  
134 inactivating mutations were introduced by site-directed mutagenesis. All CRISPRme plasmids  
135 described in this study (**Supplementary Table 1**) have been validated by Sanger sequencing and  
136 will be publically available through Addgene ([https://www.addgene.org/Yonglun\\_Luo/](https://www.addgene.org/Yonglun_Luo/)),

138 **CRISPRme gRNA design**

139 Based on the observation that CRISPRme could efficiently methylate the CpGs flanking the target  
140 sites, a web-based gRNA designing tool (**CRISPRme gRNA finder**,  
141 <http://luolab.au.dk/views/gRNA.cgi>) was developed to facilitate CRISPRme-based gRNA  
142 design. All updates regarding the CRISPRme protocol are available on the website  
143 (<http://luolab.au.dk/>). All gRNA sequences are listed in **Supplementary Table 1**.

145 **Transfection and enrichment of CRISPRme expressing cells**

146 Unless stated elsewhere, cells were transfected with gRNAs (total 500 ng) and a CRISPRme  
147 expression vector (500 ng) in six-well plates using X-tremeGENE 9 DNA transfection reagent  
148 (Roche). For single gRNA or pUC19 control transfections, the amount of plasmid added was  
149 equivalent to the total amount of plasmid added for multiple gRNA transfections. For BFP-based  
150 enrichment, cells were harvested 48 hours after transfection, and CRISPRme-expressing cells  
151 were sorted by FACS. Briefly, transfected cells were harvested by trypsinization, washed twice  
152 with 2% FBS-PBS, and re-suspended in 500 µL 2% FBS-PBS. Cells were stained with Propidium  
153 iodide (PI) before sorting. PI negative and BFP positive or negative cells were sorted with a 4  
154 Laser BD Facs Aria III instrument. For antibiotic-based enrichment, 24 hours after transfection,  
155 transfected cells were cultured in medium containing blasticidin (10 ug/mL) and puromycin (10  
156 ug/mL) for 48 hours and harvested for gene expression or DNA methylation analysis. All  
157 transfections were performed in at least two independent experiments.

158

1  
2  
3  
4  
5  
6  
7  
8  
9  
10  
11  
12  
13  
14  
15  
16  
17  
18  
19  
20  
21  
22  
23  
24  
25  
26  
27  
28  
29  
30  
31  
32  
33  
34  
35  
36  
37  
38  
39  
40  
41  
42  
43  
44  
45  
46  
47  
48  
49  
50  
51  
52  
53  
54  
55  
56  
57  
58  
59  
60  
61  
62  
63  
64  
65

159 **Quantitative PCR (qPCR)**

160 Total RNA was extracted from cells with the RNeasy Plus Mini Kit (Qiagen, 74136) according to  
161 the manufacturer's instructions and quantified using a Nanodrop 1000 Spectrophotometer. The  
162 first strand cDNA was synthesized from 100-500 ng total RNA with the iScript cDNA synthesis kit  
163 (Bio-Rad, 170-8891) following the manufacturer's instructions. qPCR was performed in triplicate  
164 for each sample, using the Light Cycler 480 SYBR Green I Master mix (Roche Life Science,  
165 04887352001) and a Light Cycler 480 qPCR machine. Each qPCR reaction contained 1 µL cDNA  
166 template (5 times diluted), 7.5 µL qPCR Master mix (2X), and 5 pmol of each qPCR primer in a  
167 total volume of 15 µL. The following qPCR program was used for *uPA*, *TGFBR3*, *CDKN2A* and  
168 *GAPDH*: 1 cycle at 95 °C for 5 min; 45 cycles at 95 °C for 10s, 57 °C for 10s, and 72 °C for 10s  
169 during which the fluorescence signal was measured. The final product was subjected to melting  
170 curve analysis. Primers for qPCR are listed in **Supplementary Table 1**. Relative gene expression  
171 was calculated using the  $2^{-\Delta\Delta CT}$  method by first normalizing to the internal control *GAPDH* ( $\Delta CT$ )  
172 and then calibrating to the transfection control pUC19 ( $\Delta\Delta CT$ ) [35].

173  
174 **DNA methylation analysis by bisulfite pyrosequencing with PyroMark Q24**

175 Genomic DNA was extracted using the DNeasy Blood & Tissue Kit (Qiagen, 69506) according to  
176 the manufacturer's instructions. A total of 200 ng of genomic DNA was bisulfite treated using the  
177 EpiTect Bisulfite Kit (Qiagen, 59104) according to the manufacturer's instructions. This converts  
178 unmethylated cytosines to uracils. The bisulfite converted DNA was eluted with 20 µL elution  
179 buffer provided by the kit. Bisulfite PCR reactions for all genes described in this study were  
180 performed in a 25 µL volume containing 0.15 µL Hotstar Taq polymerase (5U/µL) (New England  
181 Biolabs, M0495L), 2.5 µL 10xStandard buffer, 0.5 µL of 10 mM dNTPs, 1.0 µL of each primer (10  
182 µM) and 1.5 µL bisulfite converted genomic DNA. PCR was performed under the following  
183 conditions: 95 °C for 5 min followed by 45 cycles of 94 °C for 30 sec, 58 °C for 1 min, and 72 °C  
184 for 45 sec, and, finally, by 72 °C for 7 min. 4 µL PCR product was checked by gel electrophoresis.  
185 Pyrosequencing was performed with the PyroMark Q24 Advanced Reagents (Qiagen, 970922)  
186 using 20 µL PCR product from the bisulfite treated DNA and 20 µL sequencing primer (0.375 µM)  
187 according to the PyroMark Q24 CpG protocol. The general degree of cytosine methylation was  
188 determined by pyrosequencing of the bisulfite converted genomic DNA, using the PyroMark Q24  
189 Advanced system (Qiagen).

190  
191 **DNA methylation analysis by bisulfite Sanger sequencing**

192 Bisulfite converted DNA was used as template for PCR amplifications with the BS specific PCR  
193 primers listed in **Supplementary Table 1**, using the DreamTaq DNA Polymerase (Life  
194 Technologies, EP0701). PCR products were gel purified, sub-cloned in a TA-cloning vector (Life  
195 Technologies, 450030) and transformed into chemically competent *E.coli* cells. Cell clones were

1  
2  
3  
4  
5  
6  
7  
8  
9  
10  
11  
12  
13  
14  
15  
16  
17  
18  
19  
20  
21  
22  
23  
24  
25  
26  
27  
28  
29  
30  
31  
32  
33  
34  
35  
36  
37  
38  
39  
40  
41  
42  
43  
44  
45  
46  
47  
48  
49  
50  
51  
52  
53  
54  
55  
56  
57  
58  
59  
60  
61  
62  
63  
64  
65

196 manually picked, sub-cultured in 250 ul LB medium overnight, lysed, subjected to Sanger  
197 sequencing and analyzed by BISMA [36].

198

199 **Fluorescence reporter cell assay**

200 Five stable fluorescence reporter cell clones were established by randomly inserting various  
201 copies of the CMV promoter-driven mCherry expression cassette into HEK293T (pLV-mCherry  
202 was a gift from Pantelis Tsoulfas, 36084). Cells were transfected separately with each  
203 CRISPRme expression vector (50 ng) and gRNAs (total 50 ng) in 24-well plates. One-third of the  
204 transfected cells were seeded to a new plate every 2-3 days and the remainder used for flow  
205 cytometry analysis. Median mCherry intensity was measured with the BD LSRFortessa™ cell  
206 analyzer (FACS CORE facility, Aarhus University). Identical instrument settings and control beads  
207 were applied during the time course experiment to ensure valid comparison across different time  
208 points. 20,000 events were recorded for each sample. Flow cytometry data was analyzed using  
209 the Flowjo software.

210

211 **Immunostaining**

212 48 hours after transfection, cells were fixed with freshly-made 4% PFA for 15 min at room  
213 temperature, followed by three washes with DPBS. Cells were permeabilized in 0.3% Triton X-  
214 100 DPBS for 10 min and blocked in 5% goat serum-DPBS for 30 min. Cells were incubated with  
215 a primary rabbit anti-HA-tag antibody (C29F4, Cell Signaling 3724, 1:1000) overnight, followed by  
216 secondary antibody staining with Alexa Fluor 555 donkey anti-rabbit IgG (A-31572, Life  
217 technologies) at room temperature for 2 hours. Images were obtained with a confocal microscope  
218 (LSM710, Carl Zeiss).

219

220 **Southern blot analysis**

221 Genomic DNA (15 µg) from the fluorescence reporter cells was digested with *EcoRI* restriction  
222 enzyme overnight and then analyzed by gel electrophoresis with vacuum blotting. Primers for  
223 generating the mCherry probe are listed in **Supplementary Table 1**. Probe labelling was  
224 performed using the Prime-It II Random Primer Labeling Kit according to the manufacturer's  
225 instructions. Pre-hybridization and hybridization steps were carried out at 42 °C. Excess probe  
226 was washed from the membrane with SSC buffer, and the hybridization pattern was visualized on  
227 X-ray film by autoradiography.

228

229 **RNA sequencing**

230 Integrity and quantity of extracted RNA was evaluated with an Agilent 2100 Bioanalyzer  
231 according to the manufacturer's instructions. After DNase I treatment, mRNA was isolated with  
232 Oligo (dT) magnetic beads. Fragmentation buffer was added to generate short fragments of

1  
2  
3  
4  
5  
6  
7  
8  
9  
10  
11  
12  
13  
14  
15  
16  
17  
18  
19  
20  
21  
22  
23  
24  
25  
26  
27  
28  
29  
30  
31  
32  
33  
34  
35  
36  
37  
38  
39  
40  
41  
42  
43  
44  
45  
46  
47  
48  
49  
50  
51  
52  
53  
54  
55  
56  
57  
58  
59  
60  
61  
62  
63  
64  
65

233 mRNA. cDNA was synthesized using the mRNA fragments as templates, resolved with EB buffer  
234 for end repair and ligated with adaptors. After size selection and purification by agarose gel  
235 electrophoresis, cDNA with sizes of approximately 240 bp were used for PCR amplification (12  
236 cycles) and library construction. Libraries were sequenced on an Ion Proton platform (>30 million  
237 reads per sample). Sequencing reads that contained low quality, adaptor, and/or short read  
238 sequences (length < 30nt) were filtered out before mapping. tmap was used to align the clean  
239 reads to the hg19 UCSC RefSeq (RNA sequences, GRCh37). No more than 3 mismatches were  
240 allowed in the alignment. Gene expression levels were calculated by transforming uniquely  
241 mapped transcript reads to TPM (transcript per million) [37]. Differentially expressed genes were  
242 defined as genes with a Benjamini and Hochberg-adjusted P value (FDR)  $\leq$  0.001 and fold  
243 change  $\geq$  2.

244

245 **ChIP-seq**

246 HEK293T cells were transfected with dCas9-BFP-DNMT3A and five *uPA* gRNAs. 48 hours after  
247 transfection, transfected cells were subjected to ChIP with a commercially available kit ChIP-IT  
248 Express Enzymatic (53009-AF, ActivMotif, distributed by Nordic Biolabs) and an anti-HA tag  
249 antibody (C29F4, Cell Signaling) according to the manufacturer's instructions. Next generation  
250 sequencing libraries were prepared for Chip and input samples, sequenced with SE50 on Illumina  
251 HiSeq2500. Clean reads were mapped to human genome hg19 using SOAP2 with the parameter  
252 "-p 4 -v 2 -s 35". Unique mapping reads was sampled randomly and equally (62723057 reads).  
253 Peaks were called using MACS with P value  $1e^{-3}$ . Sequence motifs enriched within 70 bp of peak  
254 summits were identified using MEME-ChIP.

255

256 **WGBS library preparation and sequencing**

257 Genomic DNA was fragmented by sonication to a mean size of 250bp using a Bioruptor  
258 (Diagenode, Belgium). Bisulphite conversion was conducted with the EZ DNA Methylation-Gold  
259 kit (ZYMO). WGBS libraries were sequenced on Illumina HiSeq X Ten. After filtering out adaptor  
260 and low-quality reads, a total of 953.7Gb 150bp paired-end clean data was generated. An  
261 average of 106Gb clean data was obtained for each sample. Clean reads were aligned to the  
262 human reference genome (hg19) by BSMAP(v2.74) with the parameter "-u -v 5 -z 33 -p 6 -n 0 -w  
263 20 -s 16 -r 0 -f 10 -L 140" [38]. Only the CpG sites with read depths  $\geq$ 4 were taken into  
264 consideration for DNA methylation level calculation. The 48502 bp lambda DNA was used as an  
265 extra reference for calculating the bisulphite conversion rate. Nearly complete (>99%) bisulfite  
266 conversion was documented in all libraries.

267

268 **Identification of differentially methylated regions (DMRs) resulted from CRISPRme**

1  
2  
3  
4  
5  
6  
7  
8  
9  
10  
11  
12  
13  
14  
15  
16  
17  
18  
19  
20  
21  
22  
23  
24  
25  
26  
27  
28  
29  
30  
31  
32  
33  
34  
35  
36  
37  
38  
39  
40  
41  
42  
43  
44  
45  
46  
47  
48  
49  
50  
51  
52  
53  
54  
55  
56  
57  
58  
59  
60  
61  
62  
63  
64  
65

269 The bioconductor package DSS was used to identify DMRs with the parameter "delta >=0.1,  
270 pvalue <= 0.01, CpG sites >= 3, DMR length >= 10 bp, smoothing window 100 bp". Since  
271 expressing high amount of dCas9-BFP-DNMT3A and either uPA or TGFBR3 gRNAs caused the  
272 highest de novo on-target methylation, we reasoned that the authentic off-target DMRs should be  
273 detected in these two comparisons. We first compared group 1 (dCas9-BFP-DNMT3A (500 ng) +  
274 uPA gRNAs (500 ng)) or group 3 (dCas9-BFP-DNMT3A (500 ng) + TGFBR3 gRNAs (500 ng)) to  
275 group 9 (pUC19 control) (Supplementary Fig 11a). Next, among the DMRs found by DSS, only  
276 hypermethylated DMRs were selected. Hypomethylated DMRs were filtered as these are most  
277 likely stochastic DMRs resulted from *in vitro* cell cultivation and manipulations.

278  
279 Based on the *de novo* methylation of *uPA* and *TGFBR3* (Fig. 7) by CRISPRme, we reasoned that  
280 the authentic DMRs found between group 1 and group 9 should have mean methylation levels as:  
281 group 9 (pUC19) =< group 5 (dCas9-DNMT-3A only (500 ng)) =< group 7 (dCas9-DNMT-3A (50  
282 ng) + uPA gRNAs (50 ng)) =< group 1 (dCas9-DNMT-3A (500 ng) + uPA gRNAs (500 ng)).  
283 Similarly, the authentic DMRs found between group 3 and group 9 should have a mean  
284 methylation level as: group 9 (pUC19) =< group 5 (dCas9-DNMT-3A only (500 ng)) =< group 8  
285 (dCas9-DNMT-3A (50 ng) + TGFBR3 gRNAs (50 ng)) =< group 2 (dCas9-DNMT-3A (500 ng) +  
286 TGFBR3 gRNAs (500 ng)). We applied this methylation level-based filtering criteria to further  
287 remove potential stochastic DMRs. The remaining DMRs were subjected to all analyses as  
288 described in this study.

289  
290 **Analysis of 5nt-SEED-NGG motif density**

291 The 5nt-SEED-NGG density was calculated by counting the frequency of the sequence  
292 containing the 5 nt SEED sequences preceding a NGG site on either DNA strand. The PAM  
293 density was calculated by counting the frequency of PAM sites (NGG) on either DNA strand. The  
294 median density with standard deviation is shown in the plots in fig 8, 9 and supplementary figure  
295 12. Fisher's exact test was conducted to compare densities between different sequence datasets.

296  
297 **Statistics**

298 All values in this study were presented as mean ± standard deviation. The one-way Analysis of  
299 Variance (ANOVA) with Bonferroni multiple testing, linear regression, Wilcoxon matched-pairs  
300 signed-rank test, Fisher's exact test and Benjamini and Hochberg-adjusted P value were used  
301 for statistical analysis. A p-value < 0.05 was considered statistically significant.

302  
303

1  
2  
3  
4 304 **Results**

5  
6 305 **Generation and validation of on- and off-target DNA methylation by dCas9**  
7 306 **methyltransferases (CRISPRme)**

8  
9 307 In mammalian cells, DNA methylation is established by *de novo* DNA methyltransferases  
10 308 (DNMT3A and DNMT3B), and maintained upon replication by DNMT1 [17]. Using a similar  
11 309 approach as Vojta *et al.* and McDonald *et al.* [15, 16]., we generated dCas9 methyltransferases  
12 310 by fusing the catalytic domain of DNMT1, DNMT3A, or DNMT3B to the C-terminal end of dCas9,  
13 311 linked by a triple tandem repeated flexible linker (3XG4S, Gly-Gly-Gly-Gly-Ser) and a blue  
14 312 fluorescent protein (BFP) (**Fig. 1a and Supplementary Fig. 1a**). Expression of the fusion  
15 313 proteins were validated by BFP-based Fluorescence Activated Cell Sorting (FACS)  
16 314 (**Supplementary Fig. 1b**) and immunofluorescence staining using anti-HA tag antibody  
17 315 (**Supplementary Fig. 1c**).  
18  
19  
20  
21  
22  
23  
24

25 316  
26 317 To validate whether CRISPRme can methylate endogenous CpGs, the dCas9 methyltransferases  
27 318 were first targeted to the *uPA* promoter in HEK293T cells by co-expression with five gRNAs (*uPA*  
28 319 gRNA T1 to T5, **Fig. 1b**). The *uPA* promoter was chosen because it contains a dense CpG island  
29 320 that is hypomethylated in human cancer cells [18]. Cells were transfected with expression vectors  
30 321 for all five *uPA* gRNAs and an expression vector for dCas9-BFP-DNMT1, dCas9-BFP-DNMT3A,  
31 322 dCas9-BFP-DNMT3B, or dCas9-BFP-EGFP. 48 hours after transfection, cells were sorted into  
32 323 BFP negative (BFPn) and BFP positive (BFPp) populations by FACS. Control cells were  
33 324 transfected with an equivalent amount of pUC19 vector, subjected to the same FACS procedure,  
34 325 and BFPn cells were collected. By bisulfite pyrosequencing [19] the percentage of methylated  
35 326 CpGs (mCpGs) at individual CpG sites was quantified for the *uPA* promoter (*uPA*-MR1 and *uPA*-  
36 327 MR2 genomic regions) (**Fig. 1c**). Compared to the pUC19 transfected control cells, cells  
37 328 expressing *uPA* gRNAs and either dCas9-BFP-DNMT3A or dCas9-BFP-DNMT3B, but not  
38 329 dCas9-BFP-DNMT1 or dCas9-BFP-EGFP, had significantly higher mCpG levels ( $P$  value < 0.01,  
39 330 ANOVA test). This is consistent with previous reports showing that the C-terminal catalytic  
40 331 domains of DNMT3A and DNMT3B, but not DNMT1, are active [20, 21]. The most efficiently *de*  
41 332 *nov*o methylated CpGs were located 10-50 bp upstream and downstream of the gRNA target  
42 333 sites. CpGs located in the gRNA binding sites were not methylated by CRISPRme, most likely  
43 334 because CRISPR/dCas9 binding blocks the interaction of the methyltransferase domain with the  
44 335 CpGs (**Fig. 1c**). *De novo* methylation by dCas9-BFP-DNMT3A and gRNAs was further validated  
45 336 by bisulfite Sanger sequencing (**Supplementary Fig. 1d**). We repeated this experiment three  
46 337 times and identified similar *de novo* methylation efficiencies of the *uPA* promoter by CRISPRme  
47 338 each time.  
48  
49  
50  
51  
52  
53  
54  
55  
56  
57  
58  
59  
60  
61  
62  
63  
64  
65

1  
2  
3  
4  
5  
6  
7  
8  
9  
10  
11  
12  
13  
14  
15  
16  
17  
18  
19  
20  
21  
22  
23  
24  
25  
26  
27  
28  
29  
30  
31  
32  
33  
34  
35  
36  
37  
38  
39  
40  
41  
42  
43  
44  
45  
46  
47  
48  
49  
50  
51  
52  
53  
54  
55  
56  
57  
58  
59  
60  
61  
62  
63  
64  
65

340 Since high frequency off-target mutagenesis has been observed in previous applications of  
341 CRISPR-Cas9 [22], we investigated the specificity of dCas9-BFP-DNMT3A and dCas9-BFP-  
342 DNMT3B. For this purpose, we repeated the *uPA* promoter methylation experiment including two  
343 additional controls: (1) cells expressing either dCas9-BFP-DNMT3A or dCas9-BFP-DNMT3B  
344 together with three scrambled gRNAs (gRNAs targeting the CMV promoter), and (2) cells  
345 expressing dCas9-BFP-DNMT3A or dCas9-BFP-DNMT3B only. Bisulfite pyrosequencing results  
346 further confirmed the *de novo* methylation of *uPA* promoter by CRISPRme and *uPA* gRNAs  
347 (**Supplementary Fig. 2a**). However, CRISPRme also caused *de novo* methylation of the *uPA*  
348 promoter with scrambled gRNAs, but to a lower extent compared with the result obtained for *uPA*  
349 gRNAs. A slight increase, although not significant, of % mCpG levels was also observed in cells  
350 expressing dCas9-BFP-DNMT3A or dCas9-BFP-DNMT3B only (**Supplementary Fig. 2a**). Taken  
351 together, this indicates the presence of non gRNA-targeted methylation by CRISPRme.

352  
353 To further assess the specificity of CRISPRme, we investigated two genomic regions with  
354 sequence similarity to the *uPA* gRNA target sites: *SH2D3C* (3 gRNA mismatches) and *FAM221A*  
355 (3 gRNA mismatches) as well as the *GAPDH* promoter (9 gRNA mismatches). We did not  
356 observe significant changes in CpG methylation at the examined *SH2D3C* and *FAM221A*  
357 genomic sites in cells expressing CRISPRme relative to pUC19 control cells (**Supplementary**  
358 **Fig. 2b, c**). Surprisingly, several CpG sites in the *GAPDH* promoter were significantly methylated  
359 in cells expressing dCas9-BFP-DNMT3A together with either *uPA* or scrambled (CMV) gRNAs  
360 (**Supplementary Fig. 3a, b**). The same was observed, to a lesser extent, in cells expressing  
361 dCas9-BFP-DNMT3B (**Supplementary Fig. 3b**). This effect was less prominent in cells  
362 expressing dCas9-BFP-DNMT3A without gRNAs, further indicating that unspecific methylation of  
363 the *GAPDH* promoter is to some extent dependent on co-expression of gRNAs.

364  
365 To investigate CRISPRme mediated methylation of another genomic locus, we generated three  
366 gRNAs targeting the transforming growth factor beta receptor 3 (*TGFBR3*) promoter. Similar on-  
367 target and off-target methylation effects as described above were observed for CRISPRme with  
368 *TGFBR3* gRNAs (**Fig. 1d-g; Supplementary Fig. 4, 5**). Our DNA methylation results collectively  
369 reveal that fusion of dCas9 to the catalytic domain of DNMT3A or DNMT3B can mediate targeted  
370 *de novo* DNA methylation. However, some off-target DNA methylation is also observed and this  
371 results from both gRNA-dependent and independent effects.

372  
373 **CRISPRme-mediated *de novo* DNA methylation is mediated by the methyltransferase**  
374 **activity of the DNMT3A and DNMT3B catalytic domains**

375 *De novo* methylation by CRISPRme could be mediated either by the catalytic activity of the fused  
376 DNMT3A or DNMT3B domains, or by the recruitment of additional DNA methylation enzymes to

1  
2  
3  
4  
5  
6  
7  
8  
9  
10  
11  
12  
13  
14  
15  
16  
17  
18  
19  
20  
21  
22  
23  
24  
25  
26  
27  
28  
29  
30  
31  
32  
33  
34  
35  
36  
37  
38  
39  
40  
41  
42  
43  
44  
45  
46  
47  
48  
49  
50  
51  
52  
53  
54  
55  
56  
57  
58  
59  
60  
61  
62  
63  
64  
65

377 the binding sites facilitated by protein interactions. To elucidate the mechanism of *de novo* DNA  
378 methylation by CRISPRme, we introduced the E752A and E697A catalytically inactivating  
379 mutations [23] in the DNMT3A and DNMT3B catalytic domains, respectively. HEK293T cells were  
380 transfected with CRISPRme (dCas9-BFP-DNMT3A or dCas9-BFP-DNMT3B) or CRISPRme  
381 mutants (dCas9-BFP-DNMT3A (E752A) or dCas9-BFP-DNMT3B (E697A)) together with either  
382 *uPA* gRNAs or *TGFBR3* gRNAs. 48 hours after transfection, cells were sorted into four  
383 populations based on BFP signal intensity (1. very low: +; 2. low: ++; 3. medium: +++; and 4.  
384 high: +++) (**Fig. 2a**). The populations represent different CRISPRme expression levels and thus  
385 allowed us to investigate the effect of CRISPRme expression levels on the efficiency of *de novo*  
386 DNA methylation. Bisulfite pyrosequencing analysis of 12 CpG sites in the *uPA* promoter region  
387 (**Fig. 2b**) and 14 CpG sites in the *TGFBR3* promoter region (**Fig. 2c**) revealed that only  
388 CRISPRme but not CRISPRme catalytic mutants cause *de novo* methylation, suggesting that *de*  
389 *novo* methylation by CRISPRme is mediated by the catalytic activity of the DNMT3A and  
390 DNMT3B domains (**Fig. 2b, c; Supplementary Fig. 6a**). In the FACS-sorted cells with very low  
391 BFP signal intensity, we observed an intermediate efficacy of *de novo* methylation between that  
392 of pUC19 transfected cells and the other BFP groups. The *de novo* methylation levels of CpGs  
393 were similar for the examined *uPA* and *TGFBR3* promoter regions between cells expressing low,  
394 medium or high levels of CRISPRme (**Fig. 2b, c and Supplementary Fig. 6a**).

395  
396 Given the observation that CRISPRme can cause unspecific methylation of the *GAPDH*  
397 promoter, we next investigated whether controlling the CRISPRme expression level could be  
398 used to reduce off-target effects. We therefore analyzed the methylation state of the *GAPDH*  
399 promoter in cells FACS sorted according to BFP signal intensity (+, ++, +++, and +++++).  
400 Consistent with previous results, co-expression of dCas9-BFP-DNMT3A (**Fig. 3a**) or dCas9-BFP-  
401 DNMT3B (**Fig. 3b**) with either *uPA* or *TGFBR3* gRNAs significantly increased *de novo*  
402 methylation of *GAPDH* promoter CpGs compared to cells expressing CRISPRme without gRNAs  
403 or pUC19. Furthermore, titrating CRISPRme expression levels decreased unspecific methylation  
404 of the *GAPDH* promoter (**Fig. 3**). However, since *de novo* methylation of gRNA-targeted genes  
405 was also decreased by CRISPRme titration (**Fig. 2**), our results collectively suggest that altering  
406 CRISPRme expression levels cannot efficiently reduce unspecific methylation relative to targeted  
407 methylation.

408  
409 To investigate global methylation levels, repetitive *LINE1* elements were investigated as they  
410 represent a surrogate marker for global DNA methylation[24]. We measured the *LINE1* 5'UTR  
411 methylation by bisulfite pyrosequencing which revealed that expression of dCas9-BFP-DNMT3A  
412 and *uPA* gRNAs did not result in significant *LINE1* methylation changes (**Fig. 3c**).

413



1  
2  
3  
4 **414 Effects of CRISPRme on gene expression**

5  
6 415 Methylation of promoter DNA can be correlated with inhibition of gene transcription. To determine  
7 416 whether the CRISPRme-mediated *uPA* and *TGFBR3* promoter methylation could inhibit gene  
8  
9 417 expression, we measured *uPA* and *TGFBR3* mRNA levels by quantitative PCR (qPCR) in  
10 418 HEK293T cells expressing dCas9 fusion proteins (dCas9-BFP-DNMT1, dCas9-BFP-DNMT3A,  
11 419 dCas9-BFP-DNMT3B, or dCas9-BFP-EGFP) either without gRNAs or in combination with gRNAs  
12 420 (**Supplementary Fig. 7**). Compared to pUC19 transfection controls, *uPA* expression was  
13 421 similarly decreased in cells expressing *uPA* gRNAs (T2-T5) and either dCas9-BFP-DNMT3A,  
14 422 dCas9-BFP-DNMT3B, dCas9-BFP-DNMT1, or dCas9-BFP-EGFP (**Supplementary Fig. 7a-c**).  
15 423 The reduced expression thus does not appear to be due to *de novo* DNA methylation by  
16 424 CRISPRme as dCas9-BFP-DNMT1 and dCas9-BFP-EGFP cause decreased levels of *uPA*  
17 425 expression similar to CRISPRme despite not causing *de novo* DNA methylation. Similar results  
18 426 were observed in HEK293T cells when expressing all five *uPA* (**Supplementary Fig. 7d**) or  
19 427 *TGFBR3* (**Supplementary Fig. 7e**) gRNAs together with CRISPRme. These results were further  
20 428 validated in cells expressing CRISPRme or CRISPRme mutants with either *uPA* or *TGFBR3*  
21 429 gRNAs, respectively (**Fig. 4a; Supplementary Fig. 6b**).  
22  
23  
24  
25  
26  
27  
28  
29

30 430  
31 431 To investigate whether longer term inhibition of gene expression can be facilitated by CRISPRme,  
32 432 five HEK293T fluorescent reporter cell clones carrying different copies of a CMV-mCherry  
33 433 expression cassette (**Supplementary Fig. 8a, b**) were generated. The reporter cells were co-  
34 434 transfected with three gRNAs targeting the CMV promoter and each of the dCas9 fusion proteins.  
35 435 As controls, the reporter cells were transfected with pUC19. BFP and mCherry signal were  
36 436 quantified by flow cytometry at 2, 5, 8, and 14 days after transfection. We observed that the  
37 437 number of CRISPRme-expressing cells peaked on day 2 and decreased gradually  
38 438 (**Supplementary Fig. 8c**). Maximal inhibition of mCherry levels were observed on day 5 post  
39 439 transfection (**Supplementary Fig. 8d-h**). Compared to other dCas9 fusion proteins, the dCas-  
40 440 BFP-DNMT3A fusion resulted in the highest and longest inhibition of mCherry expression in the  
41 441 reporter cells (four out of five clones) (**Supplementary Fig. 8d-h**). The transient and prolonged  
42 442 inhibition efficacy varied among the five cell clones. For example, clone 2, which has the lowest  
43 443 copy number of transgene, showed the highest transient and longest inhibition by dCas-BFP-  
44 444 DNMT3A (**Supplementary Fig. 8e**). However, expression of mCherry was, in all clones, not  
45 445 significantly different from the pUC19 control after two weeks, suggesting that inhibition of gene  
46 446 expression by CRISPRme is not stably maintained.  
47  
48  
49  
50  
51  
52  
53  
54  
55

56 448 To investigate whether the inhibition of gene expression is specific to the gRNA targeted genes,  
57 449 we conducted RNA sequencing in HEK293T cells expressing all five *uPA* gRNAs (500 ng) and  
58 450 CRISPRme (500 ng). A large number of genes (> 1000) were differentially expressed (FDR *P*

1  
2  
3  
4  
5  
6  
7  
8  
9  
10  
11  
12  
13  
14  
15  
16  
17  
18  
19  
20  
21  
22  
23  
24  
25  
26  
27  
28  
29  
30  
31  
32  
33  
34  
35  
36  
37  
38  
39  
40  
41  
42  
43  
44  
45  
46  
47  
48  
49  
50  
51  
52  
53  
54  
55  
56  
57  
58  
59  
60  
61  
62  
63  
64  
65

451 value < 0.001, fold change > 2) in cells expressing *uPA* gRNAs and either dCas9-BFP-DNMT3A  
452 or dCas9-BFP-DNMT3B (**Fig. 4c, d**). However, similar effects on the global transcription profile  
453 were observed in cells expressing *uPA* gRNAs with dCas9-BFP-DNMT1 or with dCas9-BFP-  
454 EGFP lacking *de novo* DNA methylation activity (**Fig. 4b, e**), suggesting that the broad non-  
455 specific alteration of transcription is not related to the dCas9 methyltransferase activity. Since  
456 *uPA* is an important factor in regulating cell proliferation and functions, the large number of  
457 differentially expressed genes might be a result of both off-target effects and inhibition of *uPA*  
458 expression. Taken together, our results clearly indicate that inhibition of *uPA* and *TGFBR3*  
459 expression by CRISPRme and corresponding gRNAs is not primarily due to *de novo* DNA  
460 methylation of their promoters. The transcriptional repression could instead be caused by  
461 interference with the transcriptional initiation or elongation complexes by a mechanism similar to  
462 the one observed for the CRISPR interference (CRISPRi) system [8].

463  
464 **Generation of an alternative version of the CRISPRme system (CRISPRme2.0) with**  
465 **enhanced nuclear entry efficiency**

466 Upon staining of the CRISPRme fusion proteins in HEK293T cells, it is evident that most  
467 CRISPRme protein is located in the cytoplasm rather than in the nucleus (**Supplementary Fig.**  
468 **1c**). This is probably due to the large size of the fusion proteins hindering efficient nuclear entry.  
469 We therefore reduced the size of the CRISPRme fusion proteins by removing the BFP domain in  
470 order to increase the nuclear entry efficiency of CRISPRme. Furthermore, to enable enrichment  
471 of CRISPRme expressing cells, we used a system similar to the CRISPR activation (CRISPRa)  
472 system, in which transfected cells can be enriched by antibiotic selection [25].

473  
474 Five expression vectors were constructed encoding the human-codon-optimized dCas9 protein  
475 flanked by two copies of an NLS and conjugated to the DNMT3A or DNMT3B catalytic domains,  
476 or DNMT3A (E752A), DNMT3B (E697A) or GFP, as well as a blasticidin resistance domain (**Fig.**  
477 **5a**). In the system utilized for the experiment, the blasticidin domain is cleaved from the fusion  
478 protein upon translation via the self-cleaving 2A peptide. This can be used for drug-based  
479 enrichment of transfected cells. To distinguish the two CRISPRme systems, the previously  
480 described BFP-based version is denoted CRISPRme 1.0, and the antibiotic-based enrichment  
481 system is denoted CRISPRme 2.0.

482  
483 Firstly, to evaluate the *de novo* DNA methylation efficiency of CRISPRme 2.0, HEK293T cells  
484 were transfected with *TGFBR3* gRNAs and either dCas9-DNMT3A or dCas9-DNMT3B. Control  
485 cells were transfected with (1) pUC19; (2) CRISPRme 2.0 alone; (3) *TGFBR3* gRNAs and either  
486 dCas9-DNMT3A (E752A) or dCas9-DNMT3B (E697A); (4) *TGFBR3* gRNAs and dCas9-EGFP  
487 (**Fig. 5a**). Analysis of the 14 CpG sites of the *TGFBR3* promoter (*TGFBR3*-MR1) revealed that

1  
2  
3  
4  
5  
6  
7  
8  
9  
10  
11  
12  
13  
14  
15  
16  
17  
18  
19  
20  
21  
22  
23  
24  
25  
26  
27  
28  
29  
30  
31  
32  
33  
34  
35  
36  
37  
38  
39  
40  
41  
42  
43  
44  
45  
46  
47  
48  
49  
50  
51  
52  
53  
54  
55  
56  
57  
58  
59  
60  
61  
62  
63  
64  
65

488 expressing *TGFBR3* gRNAs with either dCas9-DNMT3A or dCas9-DNMT3B resulted in *de novo*  
489 methylation of the CpGs flanking the T2 gRNA binding site ( $P < 0.05$ , ANOVA, **Fig. 5b**). 10-fold  
490 and 3-fold increases of *de novo* methylation of the *TGFBR3* promoter were achieved in cells  
491 expressing *TGFBR3* gRNAs with either dCas9-DNMT3A or dCas9-DNMT3B, respectively,  
492 compared to pUC19 or dCas9-EGFP controls ( $P$  value  $< 0.001$ , ANOVA)(**Fig. 5c**). Similar to the  
493 observations using CRISPRme1.0, DNMT3A (E752A) and DNMT3B (E697A) catalytic mutants in  
494 the CRISPRme2.0 system lacked *de novo* methylation capacity (**Fig. 5b, c**). However, compared  
495 to the CRISPRme1.0 (**Figure 1f**), CRISPRme 2.0 appeared to have lower on-target methylation  
496 efficiency and higher unspecific methylation (**Fig. 5b, c**). Analysis of transient and long-term  
497 *TGFBR3* expression and promoter methylation in cells expressing CRISPRme 2.0 further proved  
498 that inhibition of *TGFBR3* expression was not due to CRISPRme-mediated *TGFBR3* promoter  
499 methylation (**Fig. 5d**) and not stably maintained (**Supplementary Fig. 9**).

500  
501 Since both CRISPRme 1.0 and CRISPRme 2.0 systems use the same catalytic domain of  
502 DNMT3A, we speculated that the increased unspecific methylation by CRISPRme 2.0 was  
503 related to increased CRISPRme expression levels and/or nuclear localization efficiency. The  
504 CRISPRme 1.0 and CRISPRme 2.0 systems utilize different promoters for expression of the  
505 fusion proteins. Furthermore, the BFP tag was not included in the CRISPRme 2.0 system, which  
506 might increase nuclear entry efficiency of the fusion protein. Thus, we next investigated the  
507 potential role of differential nuclear localization and expression patterns. Using fluorescence  
508 imaging to quantify the expression level and nuclear localization of the three EGFP control  
509 plasmids: dCas9-BFP-EGFP, dCas9-EGFP, and EF1a-EGFP, our results showed that both  
510 expression and nuclear entry levels of dCas9-EGFP is significantly higher ( $P$  value  $< 0.05$ ,  
511 ANOVA) than dCas9-BFP-EGFP (**Supplementary Fig. 10a**). Furthermore, we analyzed  
512 unspecific methylation of the *GAPDH* promoter in cells expressing dCas9-BFP-DNMT3A, dCas9-  
513 DNMT3A, or EF1a-DNMT3A (a control plasmid expressing the DNMT3A catalytic domain under  
514 transcriptional control of the EF1a promoter). Our results showed that cells expressing dCas9-  
515 DNMT3A (CRISPRme 2.0) and EF1a-DNMT3A showed notably higher mCpG levels than cells  
516 transfected with pUC19 (mean diff. mCpG level = 11.7% and 38.5%,  $P$  value = 0.012, Wilcoxon  
517 matched-pairs signed-rank test), while the difference between cells expressing dCas9-BFP-  
518 DNMT3A (CRISPRme1.0) and pUC19 was much smaller (mean diff. mCpG level = 2.3%,  $P$  value  
519 = 0.012, Wilcoxon matched-pairs signed-rank test) (**Supplementary Fig. 10b**). We next  
520 measured *LINE1* 5'UTR methylation. There was no significant difference in *LINE1* 5'UTR DNA  
521 methylation between cells expressing dCas9-BFP-DNMT3A and dCas9-DNMT3A  
522 (**Supplementary Fig. 10c**). However, cells transfected with the expression vector EF1a-DNMT3A  
523 had significantly higher *LINE1* methylation levels compared to pUC19 control cells (mean diff. %  
524 mCpG = 3.1,  $P$  value = 0.028, Wilcoxon matched-pairs signed-rank test) (**Supplementary Fig.**

1  
2  
3  
4  
5  
6  
7  
8  
9  
10  
11  
12  
13  
14  
15  
16  
17  
18  
19  
20  
21  
22  
23  
24  
25  
26  
27  
28  
29  
30  
31  
32  
33  
34  
35  
36  
37  
38  
39  
40  
41  
42  
43  
44  
45  
46  
47  
48  
49  
50  
51  
52  
53  
54  
55  
56  
57  
58  
59  
60  
61  
62  
63  
64  
65

525 **10c**), suggesting that increased CRISPRme expression and nuclear entry is accompanied by  
526 increased off-target methylation.

527

528 **Titration of dCas9-DNMT3A or gRNA transfection quantities decreases both on-target and**  
529 **off-target methylation**

530 Based on the above observation, we investigated whether titration of the amounts of CRISPRme  
531 2.0 plasmids used for transfection could improve DNA methylation specificity. Thus, we  
532 transfected HEK293T cells with a varying amount of dCas9-DNMT3A (5, 25, 50, 100, 250, and  
533 500 ng) alone or together with *TGFBR3* gRNAs. Control cells were transfected with pUC19  
534 plasmid in the same concentrations. We analyzed *TGFBR3* (**Fig. 6a, b**) and *GAPDH* (**Fig. 6c, d**)  
535 promoter methylation and observed that titration of dCas9-DNMT3A caused a concordant  
536 decrease in both *TGFBR3* and *GAPDH* methylation. Quantification of *TGFBR3* expression further  
537 revealed that *TGFBR3* expression decreased with increasing dCas9-DNMT3A plasmid amounts  
538 and was not related to the methylation level of the investigated *TGFBR3* promoter region (**Fig.**  
539 **6e**). Next, we tested whether decreasing the gRNA expression level could minimize gRNA-  
540 dependent off-target effects. We transfected HEK293T cells with various combinations of the  
541 amounts of dCas9-DNMT3A (5, 25, and 50 ng) and *TGFBR3* gRNAs (5, 25, 50, and 500 ng) and  
542 analyzed the methylation status of the *TGFBR3* (**Fig. 6f, g**) and *GAPDH* promoters (**Fig. 6h, i**).  
543 Bisulfite pyrosequencing results showed that titration of gRNA transfection quantities decreased  
544 both on-target (*TGFBR3*) and off-target (*GAPDH*) methylation concordantly (**Fig. 6f-i**).  
545 Collectively, our results suggest that increasing the expression of dCas9-DNMT3A and gRNAs  
546 results in enhancement of both on-target and off-target DNA methylation.

547

548 **Genome-wide bisulfite sequencing revealed off-target methylation by CRISPRme**

549 We have consistently observed that expression of CRISPRme alone or together with gRNAs  
550 results in off target DNA methylation and therefore performed whole-genome bisulfite sequencing  
551 (WGBS) to further characterize off-target effects. Nine groups of HEK293T cells were generated  
552 representing cells transfected with pUC19 (control), CRISPRme1.0 only (dCas9-BFP-DNMT3A or  
553 dCas9-BFP-DNMT3B), and CRISPRme1.0 with either *uPA* gRNAs or *TGFBR3* gRNAs  
554 (**Supplementary Fig. 11a**). Using the Illumina HiSeq X platform, we generated over 100 Gb of  
555 clean data for each sample (more than 30X coverage with a 99.5% bisulfite conversion rate). This  
556 allowed us to analyze the methylation pattern at single-base pair resolution (**Supplementary Fig.**  
557 **11a**). Since mainly CpG dinucleotides are subject to methylation in HEK293T cells  
558 (**Supplementary Fig. 11b**), all following analyses are based on CpG methylation in the entire  
559 genome (approximately 40,000,000 CpG sites). We firstly examined *uPA*, *TGFBR3* and *GAPDH*  
560 promoter methylation as revealed by WGBS in all nine groups. As illustrated in **Fig. 7**, WGBS  
561 clearly showed that the *uPA* and *TGFBR3* gRNAs could target dCas9-BFP-DNMT3A and dCas9-

1  
2  
3  
4 562 BFP-DNMT3B to the *uPA* and *TGFBR3* loci and efficiently methylate CpGs flanking the gRNA  
5 563 binding sites. Furthermore, our WGBS data revealed that CRISPRme-mediated *de novo*  
6 564 methylation of *TGFBR3* and *GAPDH* promoters occurred in a much broader region surrounding  
7 565 the gRNA binding site than previously established.  
8  
9

10 566  
11 567 Next, we analyzed the global DNA methylation profile in these nine groups of HEK293T cells.  
12 568 Consistent with the LINE1 assay, WGBS revealed that expression of CRISPRme 1.0 alone or  
13 569 together with gRNAs was not associated with global methylation changes (**Fig. 8a**,  
14 570 **Supplementary Fig. 12a**). Since we have only one replicate per group and stochastic  
15 571 methylations frequently occur in cancer cells during cultivation [26], we firstly used the DSS  
16 572 statistical method, developed by Wu et al [27], to identify the authentic off-target differentially  
17 573 methylated regions (DMRs) caused by expression of CRISPRme with gRNAs. Initially, we  
18 574 compared group 1 (dCas9-BFP-DNMT3A and uPA gRNAs, 500 ng) or group 3 (dCas9-BFP-  
19 575 DNMT3A and *TGFBR3* gRNAs, 500 ng) to group 9 (pUC19 control) using DSS. Over 10,000  
20 576 DMRs were identified (group 1: hypermethylated DMR (hyper-DMR) = 16169, hypomethylated  
21 577 DMR (hypo-DMR) = 11172; group 3: hyper-DMR = 12500, hypo-DMR = 11996). The hypo-DMRs  
22 578 most likely resulted from stochastic methylation and are not included in the following analysis.  
23 579 Secondly, based on the *de novo* methylation efficiency of *uPA* and *TGFBR3*, we applied an extra  
24 580 filtering step to exclude potential stochastic DMRs (described in the methods). Following this  
25 581 filtering, we identified two clusters of hyper-DMRs caused by expressing dCas9-BFP-DNMT3A  
26 582 together with either uPA gRNAs (denoted uPA-DMRs, n = 6236, **supplementary Table 1**) or  
27 583 *TGFBR3* gRNAs (denoted *TGFBR3*-DMRs, n = 4159, **supplementary Table 2**). The majority of  
28 584 the DMRs were < 120 bp containing 3-6 CpGs (**Supplementary Fig. 13**). The average  
29 585 methylation level of these hyper-DMRs increased significantly from pUC19 control cells to cells  
30 586 expressing CRISPRme only, low amounts of CRISPRme and gRNAs, and high amounts of  
31 587 CRISPRme and gRNAs (**Fig. 8b-c**, **Supplementary Fig. 12b-c**), in a pattern similar to the on-  
32 588 target methylation pattern previously described (**Fig. 7**). Our WGBS result revealed that  
33 589 expression of CRISPRme together with gRNAs can result in substantial off-target methylations  
34 590 throughout the genome.  
35  
36  
37  
38  
39  
40  
41  
42  
43  
44  
45  
46  
47  
48  
49

#### 50 592 **Characteristics of off-target methylation by CRISPRme**

51 593 To better understand the pattern of off-target methylation by CRISPRme, we stratified each DMR  
52 594 according to its localization in particular types of genomic regions, including promoters, coding  
53 595 sequences (CDS), introns, 5' un-translated regions (5'UTR), 3' UTR, CpG islands (CGI), CGI  
54 596 shores, Alu sequences, LINE1 sequences, and LINE2 sequences. Our results showed that both  
55 597 uPA-DMRs (**Fig. 8d**) and *TGFBR3*-DMRs (**Supplementary Fig. 12d**) were predominantly  
56 598 enriched in promoters, 5'UTR and CGI. Consistent with this finding, a metaplot of average  
57  
58  
59  
60  
61  
62  
63  
64  
65

1  
2  
3  
4  
5  
6  
7  
8  
9  
10  
11  
12  
13  
14  
15  
16  
17  
18  
19  
20  
21  
22  
23  
24  
25  
26  
27  
28  
29  
30  
31  
32  
33  
34  
35  
36  
37  
38  
39  
40  
41  
42  
43  
44  
45  
46  
47  
48  
49  
50  
51  
52  
53  
54  
55  
56  
57  
58  
59  
60  
61  
62  
63  
64  
65

599 methylation levels for all genes before the DSS call also showed that transcription start site  
600 flanking regions (overlapping with promoters and 5'UTR) were hypermethylated in cells  
601 expressing CRISPRme and gRNAs (**Supplementary Fig. 14**).

602  
603 Since dCas9 preferentially binds open chromatin regions [28], we further analyzed DNase I  
604 hypersensitivity regions based on ENCODE data from HEK293T cells (GEO#: GSM1008573) and  
605 quantified the average methylation level in DNase I hypersensitivity sites (DHS) (as an indication  
606 of sites with an open chromatin state). The DHS flanking regions (1 kb upstream and  
607 downstream) were used as a control. Compared to cells transfected with pUC19, cells expressing  
608 CRISPRme alone or together with gRNAs had significantly higher mCpG levels in the DHS sites  
609 ( $P$  value < 0.05; Wilcoxon matched-pairs signed-rank test) (**Fig. 8e, Supplementary Fig. 12e**).  
610 Whereas, the mCpG level was slightly decreased in the DNS site flanking regions (representative  
611 of less open chromatin regions with high background methylation levels). Compared to a  
612 background control sample containing the same number of randomly selected, similar-sized  
613 genomic windows as the DMRs, both uPA-DMRs and TGFBR3-DMRs were significantly enriched  
614 in DHS ( $P$  value <  $1e-300$ , Fisher's exact test, **Fig. 8f and Supplementary Fig. 12f**).

615  
616 Previous studies have discovered that complimentary base pairing between gRNA guide  
617 sequences and the PAM-proximal 5nt region (5ntSEED-PAM) is crucial for off-target binding [28,  
618 29]. We assessed the density of individual gRNA 5ntSEED-PAM sequence (5'-NNNNNNGG-3') in  
619 the hypermethylated DMRs. For each DMR, we included the 100-bp flanking sequences when  
620 calculating the presence of 5ntSEED-PAM sequence density. This is based on the previous  
621 observation that CRISPRmeonly methylates CpGs flanking the gRNA binding site. We  
622 consistently observed significant enrichment of 5ntSEED-PAM sequences for all gRNAs in these  
623 DMRs compared to the background (**Fig. 8g, Supplementary Fig. 12g**).

624  
625 **CRISPRme-mediated hypermethylated DMRs are weakly correlated with off-target binding**

626 To investigate whether CRISPRme-mediated off-target methylation is related to unspecific DNA  
627 binding by dCas9 and gRNA, we studied off-target binding sites in HEK293T cells expressing  
628 dCas9-BFP-DNMT3A and uPA gRNAs using ChIP-seq. 7754 enriched peaks ( $P$  value < 0.001,  
629 **Supplementary File 15**) were identified by ChIP-seq. These were scattered throughout the  
630 genome and mainly enriched in intron, 5'UTR, LINE 2 and DHS genomic regions (**Fig. 9a, b**).  
631 Using MEME motif scanning of ChIP peaks [30], we identified the most significant motif  
632 GAGAGGGAGNGG ( $P = 1.0e-318$ ). This motif is identical to the 9-bp sequence immediately  
633 upstream of the PAM (NGG) site of uPA gRNA T2 (GAGCCGGGCGG**GAGAGGGAG(GGG)**)  
634 (**Fig. 9b**), suggesting that T2 is dominant compared to other uPA gRNAs in mediating off-target

1  
2  
3  
4 635 binding. Analysis of 5ntSEED-PAM sequence density further confirmed that uPA T2 binding sites  
5  
6 636 were over-represented in the ChIP peaks.

7 637 We next analyzed the correlation between the ChIP peaks and the uPA-DMRs (including the  
8  
9 638 flanking 100 bp of each DMR). We found that there seems to be an increased overlap between  
10 639 ChIP peaks and uPA-DMR (+ flanking 100 bp) compared to the background control. However,  
11 640 this increase is not statically significant ( $P = 0.09$ , Fisher's exact test). Since the average  
12 641 methylation level of all ChIP peak regions exceeds 60% (**Supplementary Fig. 15**), and this may  
13 642 partially explain why there is a low correlation between ChIP peaks and DMRs given potential  
14 643 functional difficulty in further increasing the methylation level. Furthermore, ChIP-seq only  
15 644 identified sites that CRISPRme binds to strongly, whereas CRISPRme could potentially methylate  
16 645 CpGs that lie within the active regions that CRISPRme interrogate momentarily.  
17  
18  
19  
20  
21  
22

## 23 647 **Discussion**

24  
25 648 Our results demonstrate that fusing the catalytic domain of human methyltransferases (DNMT3A  
26 649 and DNMT3B) to dCas9 can be used to program DNA methylation in human cells. Since the  
27 650 dCas9 methyltransferases are targeted to a specific genomic locus simply by a small gRNA, the  
28 651 CRISPRme system is more convenient than ZF- or TALE-based methyltransferases [23, 31, 32].  
29 652 Recently, Vojta *et al.* and McDonald *et al.* reported that directly fusing the catalytic domain of  
30 653 DNMT3A to dCas9 could be used to induce DNA methylation at specific loci in HEK293T cells  
31 654 [15, 16], a method similar to the CRISPR2.0 system (dCas9-DNMT3A) in our study. Additionally,  
32 655 Peter *et al.* showed that the dCas9-DNMT3A-DNMT3L fusion can further improve *de novo*  
33 656 methylation efficiency compared to dCas9-DNMT3A [33]. Here we also show that dCas9-  
34 657 DNMT3A can methylate CpGs flanking the gRNA binding sites in genomic loci, further proving the  
35 658 general applicability of dCas9 methyltransferases for targeted DNA methylation in mammalian  
36 659 cells. In addition, our study shows for the first time that the fusion of dCas9 to the catalytic domain  
37 660 of DNMT3B is also capable of inducing specific DNA methylation, although the efficiency is lower  
38 661 than that of DNMT3A. Furthermore, in this study, we have generated the FACS-based  
39 662 CRISPR1.0 system, which provides alternative tools for programmable DNA methylation.  
40 663 Together with the reported systems, the CRISPRme systems reported in this study further  
41 664 broadens the availability and applicability of CRISPR-based reprogramming of DNA methylation.  
42 665 Based on the observation that CRISPRme can efficiently methylate the flanking CpG sites from  
43 666 the gRNA binding site, we developed an open-source web-based gRNA designing tool for  
44 667 CRISPRme gRNAs (<http://luolab.au.dk/views/gRNA.cgi>).  
45  
46  
47  
48  
49  
50  
51  
52  
53  
54  
55  
56

57 668  
58 669 On the basis of extensive gene-specific and whole-genome bisulfite sequencing (WGBS), we  
59 670 identified novel off-target methylation characteristics that appear to be predominantly enriched in  
60  
61  
62  
63  
64  
65

1  
2  
3  
4  
5  
6  
7  
8  
9  
10  
11  
12  
13  
14  
15  
16  
17  
18  
19  
20  
21  
22  
23  
24  
25  
26  
27  
28  
29  
30  
31  
32  
33  
34  
35  
36  
37  
38  
39  
40  
41  
42  
43  
44  
45  
46  
47  
48  
49  
50  
51  
52  
53  
54  
55  
56  
57  
58  
59  
60  
61  
62  
63  
64  
65

671 promoter, 5'UTR, CGI, and open chromatin regions. Since most of these genomic regions are  
672 hypomethylated in HEK293T cells (**Fig. 8e, Supplementary Fig. 12e, 13**), it is not surprising that  
673 the off-target DMRs were enriched in these regions. While for other genomic regions which  
674 already have methylated cytosine, it is not possible for CRISPRme to methylate them further. Our  
675 study also revealed the gRNA-dependent off-target methylation, which is consistent with the  
676 observations of McDonald *et al.* and Vojta *et al.* [15, 16]. Additionally, we have discovered that  
677 even in the absence of gRNAs, expression of the dCas9 methyltransferase construct alone can  
678 cause unspecific DNA methylation. Our WGBS results show that CRISPRme can cause some  
679 off-target DNA methylation throughout the genome. Our study is the first to characterize the on-  
680 target and off-target DNA methylation characteristics by dCas9 methyltransferases on a genome-  
681 wide scale with single-base resolution.

682  
683 As is the case for other CRISPR/dCas9-based epigenome engineering technologies [11, 12],  
684 improvement of CRISPRme specificity to minimize the gRNA-dependent and gRNA-independent  
685 off-target activity is crucial for future applications of the technology. McDonald, et al., has  
686 observed significant reduction in off-target methylation using DOX inducible dCas9-DNMT3A-CD.  
687 Consistent with these findings, we found that reducing the CRISPRme and gRNA expression  
688 levels, as well as lowering the CRISPRme nuclear entry efficiency, can reduce off-target  
689 methylation. However, this approach also reduced on-target methylation levels accordingly, this  
690 may not represent a plausible way of increasing the specificity of the system. Thus, new  
691 approaches should be developed to reduce off-target methylation to insignificant levels, while  
692 maintaining sufficient on-target methylation efficiencies. The results presented in this study  
693 highlight the importance of extensive control experiments in subsequent experiments, such as the  
694 use of CRISPRme mutants, scrambled gRNAs, or no gRNAs. This is necessary for reliable  
695 interpretations of correlations between specific DNA methylation events by CRISPRme and  
696 phenotypic effects.

697  
698 In this study, we have observed that CRISPRme can efficiently inhibit expression of genes in  
699 human cells. However, the transient inhibition of gene expression is not directly related to specific  
700 methylation by CRISPRme. A previous study reported that targeted DNA methylation by a zinc  
701 finger-based methyltransferase is not stably maintained [34]. Our time-course experiments to  
702 study the inhibition of gene expression and maintenance of CRISPRme *de novo* DNA methylation  
703 demonstrate that the established *de novo* methylation is gradually lost during *in vitro* expansion of  
704 the transfected cells. This could be the result of removal of the *de novo* established epigenetic  
705 marks, dilution of the CRISPRme expression plasmids, and/or negative selection of the cells  
706 expressing CRISPRme. We also realized that, in this study, DNA methylation and gene  
707 expression were conducted in cells transiently transfected with CRISPRme expression plasmids,



1  
2  
3  
4  
5  
6  
7  
8  
9  
10  
11  
12  
13  
14  
15  
16  
17  
18  
19  
20  
21  
22  
23  
24  
25  
26  
27  
28  
29  
30  
31  
32  
33  
34  
35  
36  
37  
38  
39  
40  
41  
42  
43  
44  
45  
46  
47  
48  
49  
50  
51  
52  
53  
54  
55  
56  
57  
58  
59  
60  
61  
62  
63  
64  
65

708 which would lead to overexpression of the CRISPRme proteins. Thus, future studies should be  
709 conducted in cells stably (or conditionally) expressing one copy of CRISPRme to minimize off-  
710 target methylation.

711

712 **Conclusions**

713 The two CRISPRme systems presented here and other dCas9 fusion protein systems described  
714 previously [11, 12, 15, 16] provide useful tools for targeted epigenome editing. Continued  
715 improvement of the specificities of these systems and combining tools to enable simultaneous  
716 modification of multiple histones and DNA loci will enable more precise and stable regulation of  
717 gene expression. Such CRISPR gRNA-guided programmable epigenetic modification tools will  
718 hopefully have broad research applications to delineate the association between specific  
719 epigenetic changes, gene-expression regulation, and phenotypes.

720

721 **Availability of supporting data**

722 RNA sequencing, WGBS, and ChIP-seq data are available from the publicly available repository  
723 (GEO).

724 RNA-seq: GSE74935

725 CRISPRme: GSE92311

726 WGBS: GSE92310

727 ChIP-seq: GSE92261

728

729 **Declarations**

730 **Competing Interests Statement**

731 The authors declare no competing financial interests.

732

733 **Author contributions**

734 L.L., L.B. and Y.L., conceived the idea.

735 H.Y., J.W., L.B., X.X., A.L.N., and Y.L. planned and oversaw the study

736 L.L., Y.Liu., J.H., F.X., T.F.D., T.S.P., B.H., L.Y., Q.Z., F.F., S.L., K.T.J. L.F., E.S., and Y.L.

737 performed experiments and analyzed the data.

738 L.L., J.H., and Y.L. prepared the figures.

739 L.L. and Y.L. drafted the manuscript and all authors revised the manuscript.

740

741 **Acknowledgements**

742 This work was partially supported by grants from Danish Research Council for Independent  
743 Research DFF-1337-00128 (Y.L.), the Sapere Aude Young Research Talent Prize DFF-1335-

1  
2  
3  
4  
5  
6  
7  
8  
9  
10  
11  
12  
13  
14  
15  
16  
17  
18  
19  
20  
21  
22  
23  
24  
25  
26  
27  
28  
29  
30  
31  
32  
33  
34  
35  
36  
37  
38  
39  
40  
41  
42  
43  
44  
45  
46  
47  
48  
49  
50  
51  
52  
53  
54  
55  
56  
57  
58  
59  
60  
61  
62  
63  
64  
65

744 00763A (Y.L.), the Innovation Fund Denmark (BrainStem, Y.L.) and the Lundbeck Foundation:  
745 R173-2014-1105 (Y.L.); R151-2013-14439 (L.B.); R219-2016-1375 (L.L.) A.L.N. was supported  
746 by the Toyota-Foundation and the Lundbeck Foundation. FACS was performed with help from  
747 Charlotte Christie Petersen and Anni Skovbo at the FACS Core Facility, Aarhus University,  
748 Denmark.

749

750 **Abbreviations**

751 CRISPRme: CRISPR-guided DNA methyltransferase or dCas9 methyltransferase

752 CRISPR: Clustered Regularly Interspaced Short Palindromic Repeats

753 Cas9: CRISPR-associated protein 9

754 dCas9: Nuclease deficient Cas9 or dead Cas9

755 FACS: Fluorescence-activated cell sorting

756 WGBS: whole-genome bisulfite sequencing

757 CGI: CpG island

758 UTR: Untranslated region

759 DHS: DNase I hypersensitivity sites

760 PAM: Protospacer adjacent motif

761 gRNA: guide RNA

762 ZF: zinc finger protein

763 TALE: transcription-activator-like effectors

764 qPCR: Quantitative PCR

1  
2  
3  
4  
5  
6  
7  
8  
9  
10  
11  
12  
13  
14  
15  
16  
17  
18  
19  
20  
21  
22  
23  
24  
25  
26  
27  
28  
29  
30  
31  
32  
33  
34  
35  
36  
37  
38  
39  
40  
41  
42  
43  
44  
45  
46  
47  
48  
49  
50  
51  
52  
53  
54  
55  
56  
57  
58  
59  
60  
61  
62  
63  
64  
65

765 **Reference:**

- 766 1. Jinek M, Chylinski K, Fonfara I, Hauer M, Doudna JA, Charpentier E: **A**  
767 **programmable dual-RNA-guided DNA endonuclease in adaptive**  
768 **bacterial immunity.** *Science* 2012, **337**:816-821.
- 769 2. Mali P, Yang L, Esvelt KM, Aach J, Guell M, Dicarlo JE, Norville JE, Church GM:  
770 **RNA-Guided Human Genome Engineering via Cas9.** *Science* 2013.
- 771 3. Jinek M, East A, Cheng A, Lin S, Ma E, Doudna J: **RNA-programmed genome**  
772 **editing in human cells.** *elife* 2013, **2**:e00471.
- 773 4. Cong L, Ran FA, Cox D, Lin S, Barretto R, Habib N, Hsu PD, Wu X, Jiang W,  
774 Marraffini LA, Zhang F: **Multiplex genome engineering using CRISPR/Cas**  
775 **systems.** *Science* 2013, **339**:819-823.
- 776 5. Johan Vad-Nielsen LL, Lars Bolund, Anders Lade Nielsen, Yonglun Luo  
777 **Golden-Gate assembly of CRISPR gRNA Expression Array for**  
778 **Simultaneously Targeting Multiple Genes.** *Cell Mol Life Sci* 2016.
- 779 6. Qi LS, Larson MH, Gilbert LA, Doudna JA, Weissman JS, Arkin AP, Lim WA:  
780 **Repurposing CRISPR as an RNA-Guided Platform for Sequence-Specific**  
781 **Control of Gene Expression.** *Cell* 2013, **152**:1173-1183.
- 782 7. Cheng AW, Wang H, Yang H, Shi L, Katz Y, Theunissen TW, Rangarajan S,  
783 Shivalila CS, Dadon DB, Jaenisch R: **Multiplexed activation of endogenous**  
784 **genes by CRISPR-on, an RNA-guided transcriptional activator system.**  
785 *Cell Res* 2013, **23**:1163-1171.
- 786 8. Gilbert LA, Larson MH, Morsut L, Liu Z, Brar GA, Torres SE, Stern-Ginossar N,  
787 Brandman O, Whitehead EH, Doudna JA, et al: **CRISPR-mediated modular**  
788 **RNA-guided regulation of transcription in eukaryotes.** *Cell* 2013,  
789 **154**:442-451.
- 790 9. Fujita T, Fujii H: **Efficient isolation of specific genomic regions and**  
791 **identification of associated proteins by engineered DNA-binding**  
792 **molecule-mediated chromatin immunoprecipitation (enChIP) using**  
793 **CRISPR.** *Biochem Biophys Res Commun* 2013, **439**:132-136.
- 794 10. Chen B, Gilbert LA, Cimini BA, Schnitzbauer J, Zhang W, Li GW, Park J,  
795 Blackburn EH, Weissman JS, Qi LS, Huang B: **Dynamic imaging of genomic**  
796 **loci in living human cells by an optimized CRISPR/Cas system.** *Cell* 2013,  
797 **155**:1479-1491.
- 798 11. Kearns NA, Pham H, Tabak B, Genga RM, Silverstein NJ, Garber M, Maehr R:  
799 **Functional annotation of native enhancers with a Cas9-histone**  
800 **demethylase fusion.** *Nat Methods* 2015, **12**:401-403.
- 801 12. Hilton IB, D'Ippolito AM, Vockley CM, Thakore PI, Crawford GE, Reddy TE,  
802 Gersbach CA: **Epigenome editing by a CRISPR-Cas9-based**  
803 **acetyltransferase activates genes from promoters and enhancers.** *Nat*  
804 *Biotechnol* 2015, **33**:510-517.
- 805 13. Jones PA, Baylin SB: **The fundamental role of epigenetic events in cancer.**  
806 *Nat Rev Genet* 2002, **3**:415-428.
- 807 14. Brena RM, Costello JF: **Genome-epigenome interactions in cancer.** *Hum*  
808 *Mol Genet* 2007, **16 Spec No 1**:R96-105.

1  
2  
3  
4  
5  
6  
7  
8  
9  
10  
11  
12  
13  
14  
15  
16  
17  
18  
19  
20  
21  
22  
23  
24  
25  
26  
27  
28  
29  
30  
31  
32  
33  
34  
35  
36  
37  
38  
39  
40  
41  
42  
43  
44  
45  
46  
47  
48  
49  
50  
51  
52  
53  
54  
55  
56  
57  
58  
59  
60  
61  
62  
63  
64  
65

809 15. Vojta A, Dobrinic P, Tadic V, Bockor L, Korac P, Julg B, Klasic M, Zoldos V:  
810 **Repurposing the CRISPR-Cas9 system for targeted DNA methylation.**  
811 *Nucleic Acids Res* 2016.

812 16. McDonald JI, Celik H, Rois LE, Fishberger G, Fowler T, Rees R, Kramer A,  
813 Martens A, Edwards JR, Challen GA: **Reprogrammable CRISPR/Cas9-based**  
814 **system for inducing site-specific DNA methylation.** *Biol Open* 2016, **5**:866-  
815 874.

816 17. Law JA, Jacobsen SE: **Establishing, maintaining and modifying DNA**  
817 **methylation patterns in plants and animals.** *Nat Rev Genet* 2010, **11**:204-  
818 220.

819 18. Pakneshan P, Szyf M, Farias-Eisner R, Rabbani SA: **Reversal of the**  
820 **hypomethylation status of urokinase (uPA) promoter blocks breast**  
821 **cancer growth and metastasis.** *J Biol Chem* 2004, **279**:31735-31744.

822 19. Dejeux E, El abdalaoui H, Gut IG, Tost J: **Identification and quantification of**  
823 **differentially methylated loci by the pyrosequencing technology.**  
824 *Methods Mol Biol* 2009, **507**:189-205.

825 20. Gowher H, Jeltsch A: **Molecular enzymology of the catalytic domains of**  
826 **the Dnmt3a and Dnmt3b DNA methyltransferases.** *J Biol Chem* 2002,  
827 **277**:20409-20414.

828 21. Margot JB, Aguirre-Arteta AM, Di Giacco BV, Pradhan S, Roberts RJ, Cardoso  
829 MC, Leonhardt H: **Structure and function of the mouse DNA**  
830 **methyltransferase gene: Dnmt1 shows a tripartite structure.** *J Mol Biol*  
831 2000, **297**:293-300.

832 22. Fu Y, Foden JA, Khayter C, Maeder ML, Reyon D, Joung JK, Sander JD: **High-**  
833 **frequency off-target mutagenesis induced by CRISPR-Cas nucleases in**  
834 **human cells.** *Nat Biotechnol* 2013.

835 23. Rivenbark AG, Stolzenburg S, Beltran AS, Yuan X, Rots MG, Strahl BD,  
836 Blancafort P: **Epigenetic reprogramming of cancer cells via targeted DNA**  
837 **methylation.** *Epigenetics* 2012, **7**:350-360.

838 24. Yang AS, Estecio MR, Doshi K, Kondo Y, Tajara EH, Issa JP: **A simple method**  
839 **for estimating global DNA methylation using bisulfite PCR of repetitive**  
840 **DNA elements.** *Nucleic Acids Res* 2004, **32**:e38.

841 25. Konermann S, Brigham MD, Trevino AE, Joung J, Abudayyeh OO, Barcena C,  
842 Hsu PD, Habib N, Gootenberg JS, Nishimasu H, et al: **Genome-scale**  
843 **transcriptional activation by an engineered CRISPR-Cas9 complex.**  
844 *Nature* 2015, **517**:583-588.

845 26. Landan G, Cohen NM, Mukamel Z, Bar A, Molchadsky A, Brosh R, Horn-Saban  
846 S, Zalcenstein DA, Goldfinger N, Zundeleovich A, et al: **Epigenetic**  
847 **polymorphism and the stochastic formation of differentially methylated**  
848 **regions in normal and cancerous tissues.** *Nat Genet* 2012, **44**:1207-1214.

849 27. Wu H, Xu T, Feng H, Chen L, Li B, Yao B, Qin Z, Jin P, Conneely KN: **Detection**  
850 **of differentially methylated regions from whole-genome bisulfite**  
851 **sequencing data without replicates.** *Nucleic Acids Res* 2015, **43**:e141.

852 28. Kuscu C, Arslan S, Singh R, Thorpe J, Adli M: **Genome-wide analysis reveals**  
853 **characteristics of off-target sites bound by the Cas9 endonuclease.** *Nat*  
854 *Biotechnol* 2014, **32**:677-683.

1  
2  
3  
4  
5  
6  
7  
8  
9  
10  
11  
12  
13  
14  
15  
16  
17  
18  
19  
20  
21  
22  
23  
24  
25  
26  
27  
28  
29  
30  
31  
32  
33  
34  
35  
36  
37  
38  
39  
40  
41  
42  
43  
44  
45  
46  
47  
48  
49  
50  
51  
52  
53  
54  
55  
56  
57  
58  
59  
60  
61  
62  
63  
64  
65

855 29. Wu X, Scott DA, Kriz AJ, Chiu AC, Hsu PD, Dadon DB, Cheng AW, Trevino AE,  
856 Konermann S, Chen S, et al: **Genome-wide binding of the CRISPR**  
857 **endonuclease Cas9 in mammalian cells.** *Nat Biotechnol* 2014, **32**:670-676.  
858 30. Bailey TL, Elkan C: **Fitting a mixture model by expectation maximization**  
859 **to discover motifs in biopolymers.** *Proc Int Conf Intell Syst Mol Biol* 1994,  
860 **2**:28-36.  
861 31. Bernstein DL, Le Lay JE, Ruano EG, Kaestner KH: **TALE-mediated epigenetic**  
862 **suppression of CDKN2A increases replication in human fibroblasts.** *J*  
863 *Clin Invest* 2015, **125**:1998-2006.  
864 32. Meister GE, Chandrasegaran S, Ostermeier M: **Heterodimeric DNA**  
865 **methyltransferases as a platform for creating designer zinc finger**  
866 **methyltransferases for targeted DNA methylation in cells.** *Nucleic Acids*  
867 *Res* 2010, **38**:1749-1759.  
868 33. Stepper P, Kungulovski G, Jurkowska RZ, Chandra T, Krueger F, Reinhardt R,  
869 Reik W, Jeltsch A, Jurkowski TP: **Efficient targeted DNA methylation with**  
870 **chimeric dCas9-Dnmt3a-Dnmt3L methyltransferase.** *Nucleic Acids Res*  
871 2016.  
872 34. Kungulovski G, Nunna S, Thomas M, Zanger UM, Reinhardt R, Jeltsch A:  
873 **Targeted epigenome editing of an endogenous locus with chromatin**  
874 **modifiers is not stably maintained.** *Epigenetics Chromatin* 2015, **8**:12.  
875 35. Livak KJ, Schmittgen TD: **Analysis of relative gene expression data using**  
876 **real-time quantitative PCR and the 2(-Delta Delta C(T)) Method.** *Methods*  
877 2001, **25**:402-408.  
878 36. Rohde C, Zhang Y, Reinhardt R, Jeltsch A: **BISMA--fast and accurate**  
879 **bisulfite sequencing data analysis of individual clones from unique and**  
880 **repetitive sequences.** *BMC Bioinformatics* 2010, **11**:230.  
881 37. Wagner GP, Kin K, Lynch VJ: **Measurement of mRNA abundance using**  
882 **RNA-seq data: RPKM measure is inconsistent among samples.** *Theory*  
883 *Biosci* 2012, **131**:281-285.  
884 38. Xi Y, Li W: **BSMAP: whole genome bisulfite sequence MAPping program.**  
885 *BMC Bioinformatics* 2009, **10**:232.  
886  
887  
888

889 **Figure captions**

890 **Fig. 1**

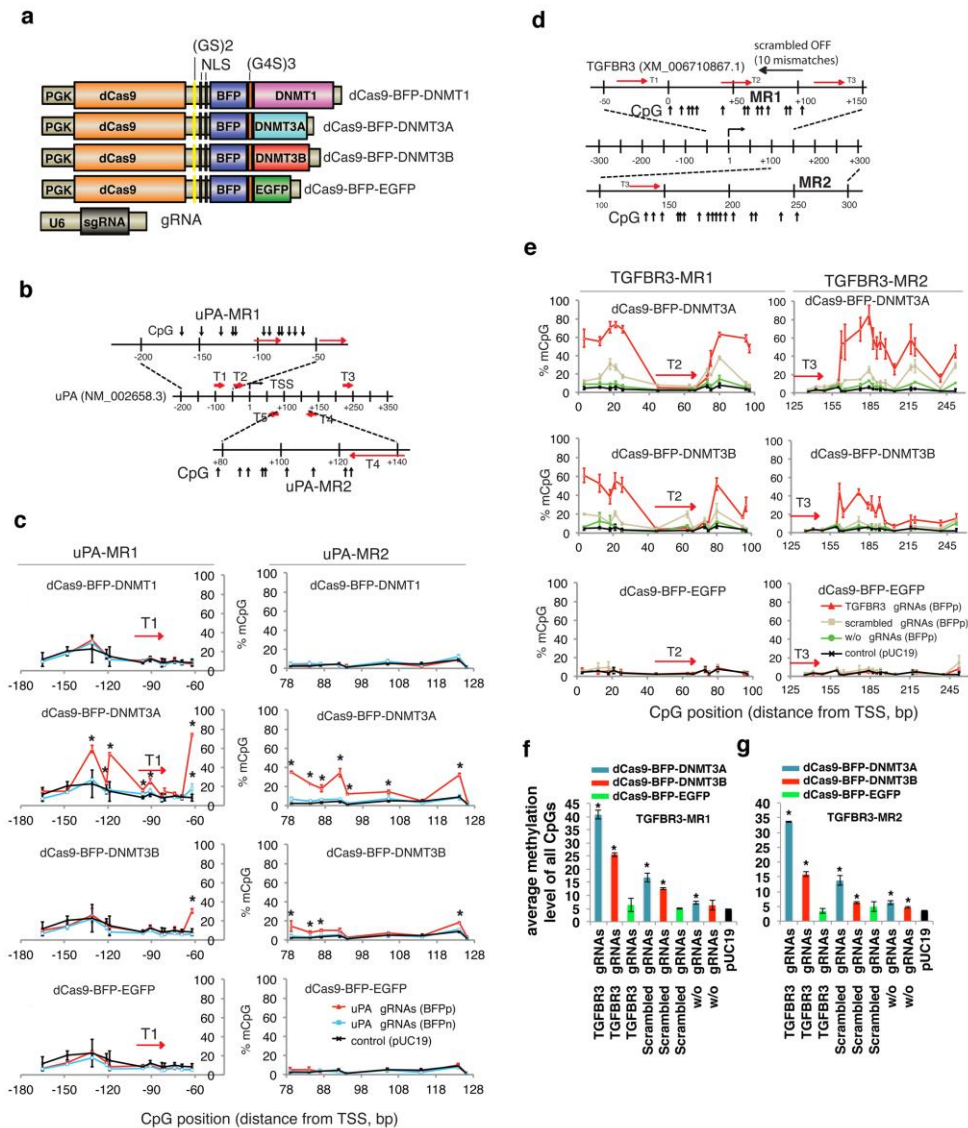

891 **Fig. 1 De novo uPA and TGFBR3 methylation by RNA-guided dCas9 methyltransferases (CRISPRme1.0)**

892 (a) Schematic illustration of the CRISPRme expression vectors. The catalytically inactive dCas9  
 893 was fused to blue fluorescent protein (BFP) and either (i) a methyltransferase catalytic domain  
 894 (DNMT1, DNMT3A, or DNMT3B), or (ii) green fluorescent protein (EGFP). These constructs are  
 895 constitutively driven by the PGK promoter. A stretch of Gly and Ser residues (GS or G4S) are  
 896 used as flexible linkers that connect the fused proteins. NLS denotes a nuclear localization signal.  
 897 The gRNA chimera is expressed from the human U6 polymerase III promoter. (b) Schematic  
 898 illustration of the uPA promoter with CRISPRme gRNA target sites (T1-T5), two uPA methylated  
 899 regions (uPA-MR1, uPA-MR2) and CpGs analyzed by bisulfite pyrosequencing. Transcription  
 900

1  
2  
3  
4  
5  
6  
7  
8  
9  
10  
11  
12  
13  
14  
15  
16  
17  
18  
19  
20  
21  
22  
23  
24  
25  
26  
27  
28  
29  
30  
31  
32  
33  
34  
35  
36  
37  
38  
39  
40  
41  
42  
43  
44  
45  
46  
47  
48  
49  
50  
51  
52  
53  
54  
55  
56  
57  
58  
59  
60  
61  
62  
63  
64  
65

901 start site (TSS) is annotated according to transcript NM\_002658.3 and numbers indicate  
902 distances in base pairs. **(c)** Line plots of the percentage of methylated CpGs (mCpG) in uPA-MR1  
903 (left) and uPA-MR2 (right) in the BFP positive (BFPP; red line) and BFP negative (BFPn; light  
904 blue line) cells co-transfected with *uPA* gRNAs (T1-T5) and either dCas9-BFP-DNMT1, dCas9-  
905 BFP-DNMT3A, dCas9-BFP-DNMT3B, or dCas9-BFP-EGFP. Note that %mCpG in control cells  
906 transfected with pUC19 has been re-plotted as a reference (black line). BFPn cells include cells  
907 expressing very low level of CRISPRme. Each data point represents mean  $\pm$  SD (n = 2-4).  
908 Asterisk (\*) indicates statistical significance (p < 0.05) compared to the control after Bonferroni  
909 correction. **(d)** Schematic illustration of the human *TGFBR3* promoter locus, *TGFBR3* gRNA  
910 binding sites (red arrows), potential off-target binding sites (black horizontal arrows) of the  
911 scrambled gRNA, and CpG sites. **(e)** Line plots of % mCpG at the *TGFBR3* promoter in cells  
912 expressing CRISPRme with (red line) or without (green line) *TGFBR3* gRNAs, or with the  
913 scrambled gRNAs (gray line). Note that %mCpG in control cells transfected with pUC19 has been  
914 re-plotted as a reference (black line). Each data point represents mean  $\pm$  SD (n = 2-5). **(f-g)** Bar  
915 chart of average methylation levels for TGFBR3-MR1 **(f)** and TGFBR3-MR2 **(g)** CpG sites.  
916 Values represent mean  $\pm$  SD (n = 3). Asterisk (\*) represents P value < 0.05 compared to pUC19  
917 (ANOVA).

Fig 2

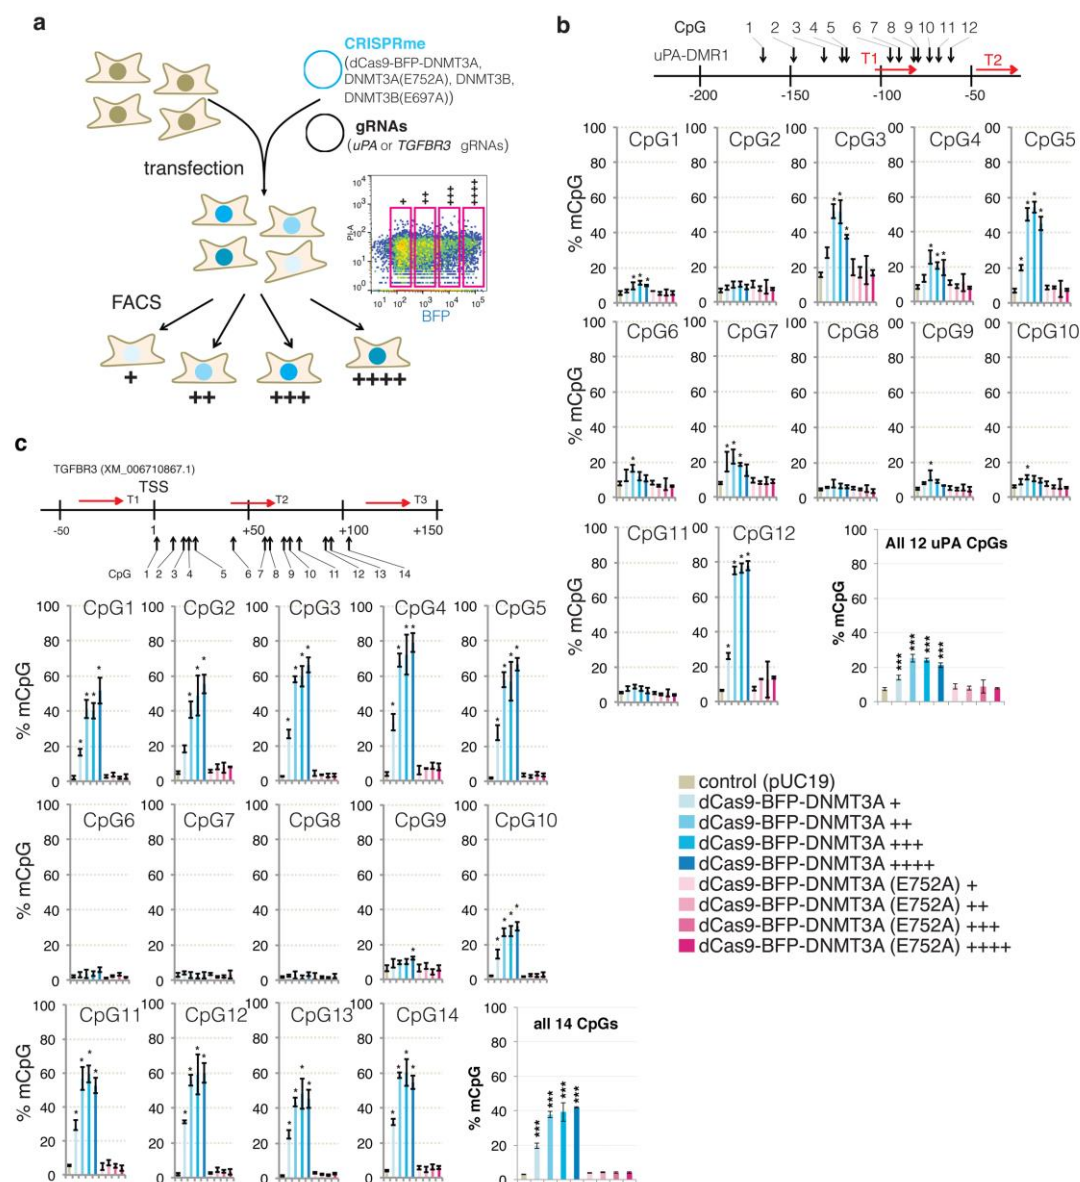

919  
920 **Fig. 2 CRISPRme-mediated DNA methylation is mediated by the methyltransferase**  
921 **catalytic activity**

922 (a) Schematic illustration of the experiment. CRISPRme mutations were generated by introducing  
923 the E752A and E697A mutations in the DNMT3A and DNMT3B catalytic domains, respectively.  
924 CRISPRme-expressing cells were enriched by FACS 48 hours after transfection and sorted  
925 according to the BPF signal: +, ++, +++, +++++. Right: Representative FACS plot and gating. (b-c)  
926 Bar charts indicating % mCpG for individual CpG and average values of all CpG sites in the *uPA*  
927 (b) and *TGFBR3* (c) target regions. The schematic illustrations above the bar graphs show gRNA  
928 binding sites and CpG sites analyzed. Value represents mean  $\pm$  SD (n = 3). Asterisk (\*) indicates



1  
2  
3  
4  
5  
6  
7  
8  
9  
10  
11  
12  
13  
14  
15  
16  
17  
18  
19  
20  
21  
22  
23  
24  
25  
26  
27  
28  
29  
30  
31  
32  
33  
34  
35  
36  
37  
38  
39  
40  
41  
42  
43  
44  
45  
46  
47  
48  
49  
50  
51  
52  
53  
54  
55  
56  
57  
58  
59  
60  
61  
62  
63  
64  
65

929 statistical significance ( $p < 0.05$ , ANOVA) compared to the control after Bonferroni correction.

930 Figure legend for bar graphs in **(b)** and **(c)** is presented at bottom-right.

931

Fig. 3

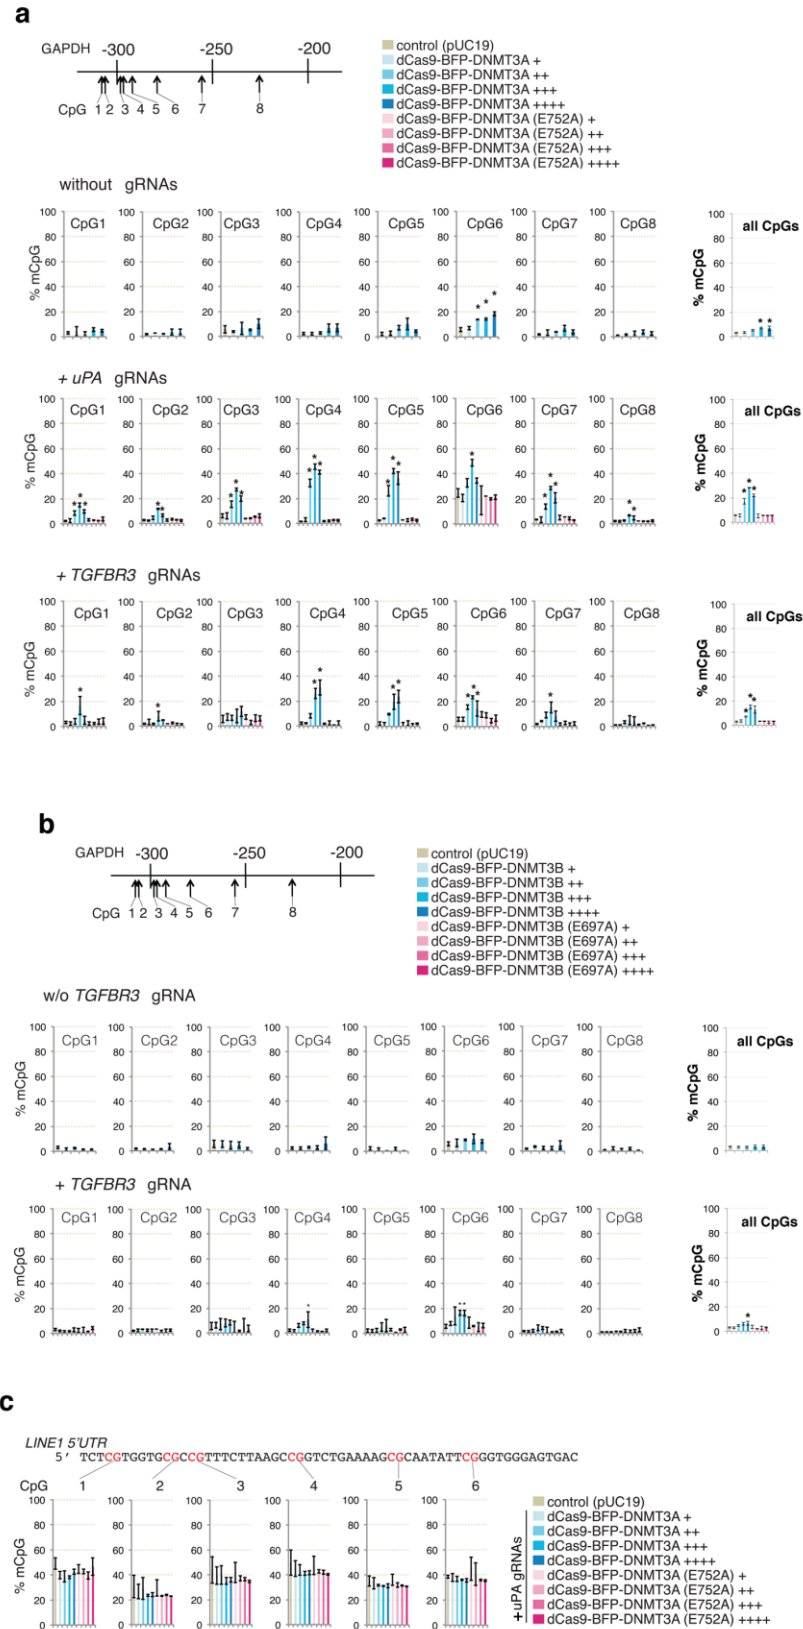

1  
2  
3  
4  
5  
6  
7  
8  
9  
10  
11  
12  
13  
14  
15  
16  
17  
18  
19  
20  
21  
22  
23  
24  
25  
26  
27  
28  
29  
30  
31  
32  
33  
34  
35  
36  
37  
38  
39  
40  
41  
42  
43  
44  
45  
46  
47  
48  
49  
50  
51  
52  
53  
54  
55  
56  
57  
58  
59  
60  
61  
62  
63  
64  
65

933 **Fig. 3 Effect of CRISPRme on *GAPDH* and *LINE1* methylation**

934 **(a)** Bar charts indicating % mCpG at individual CpGs and total % mCpG (8 CpG sites) for the  
935 *GAPDH* promoter in cells expressing different levels (BFP signal: +, ++, +++, +++) of dCas9-  
936 BFP-DNMT3A or dCas9-BFP-DNMT3A (E752A) alone or together with either *uPA* or *TGFBR3*  
937 gRNAs. **(b)** Bar charts indicating % mCpG in the *GAPDH* promote in cells expressing different  
938 levels (BFP signal: +, ++, +++, +++) of dCas9-BFP-DNMT3B or Cas9-BFP-DNMT3B (E697A)  
939 alone or with *TGFBR3* gRNAs. **(c)** *LINE1* 5'UTR methylation in cells expressing *uPA* gRNAs with  
940 different levels of either dCas9-BFP-DNMT3A or dCas9-BFP-DNMT3A (E752A). Cells  
941 transfected with pUC19 were used as controls. Values represent mean  $\pm$  SD (n = 3). Asterisks (\*)  
942 represent P value < 0.05 (ANOVA) compared to pUC19.

943  
944

Fig 4

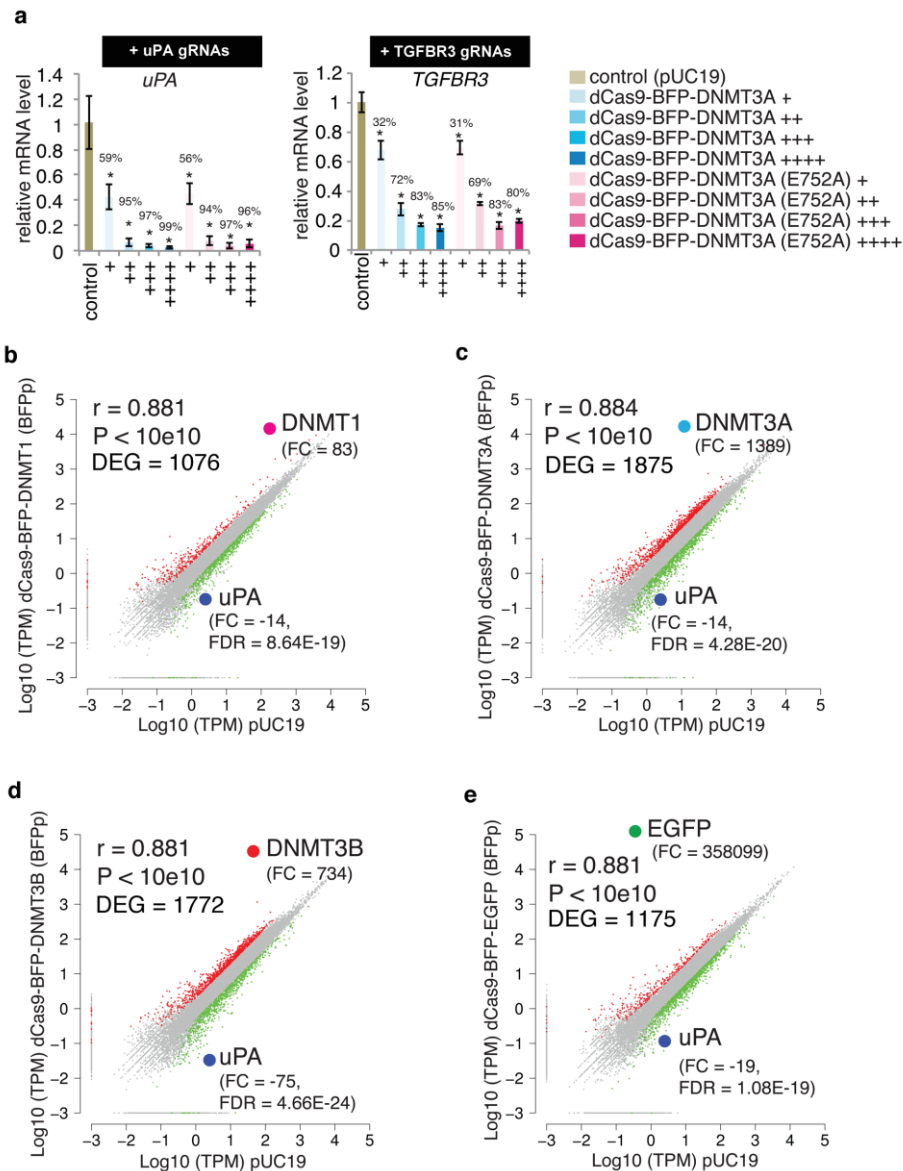

Fig. 4 Effect of CRISPRme on gene expression

(a) Relative gene expression levels of *uPA* (left) and *TGFBR3* (right) in cells expressing different levels of dCas9-BFP-DNMT3A or dCas9-BFP-DNMT3A (E752A), measured by qPCR and quantified as fold change compared to control cells transfected with pUC19. Bar charts depict mean change in mRNA level compared to pUC19 controls. Data represent mean  $\pm$  SD ( $n = 3$  independent transfections). Mean percentage decrease in mRNA level compared to pUC19 are presented on top of bars. Asterisks (\*) represent P value  $< 0.05$  compared to pUC19. (b-e) Dot plots of log<sub>10</sub> (transcripts per million (TPM)) for all genes expressed in the BFPp cells expressing *uPA* gRNAs (T1-T5) and dCas9-BFP-DNMT1 (b), dCas9-BFP-DNMT3A (c), dCas9-BFP-DNMT3B (d), or dCas9-BFP-EGFP (e) plotted against log<sub>10</sub> (TPM) in a pUC19 control group.

1  
2  
3  
4  
5  
6  
7  
8  
9  
10  
11  
12  
13  
14  
15  
16  
17  
18  
19  
20  
21  
22  
23  
24  
25  
26  
27  
28  
29  
30  
31  
32  
33  
34  
35  
36  
37  
38  
39  
40  
41  
42  
43  
44  
45  
46  
47  
48  
49  
50  
51  
52  
53  
54  
55  
56  
57  
58  
59  
60  
61  
62  
63  
64  
65

956 Differentially expressed genes (DEG) are marked in red (up-regulated) and green (down-  
957 regulated) (fold change  $\geq 2$ , FDR  $< 0.001$ ). Fold changes compared to the control (pUC19) and  
958 FDR p-values for DNMT1, DNMT3A, DNMT3B, EGFP, and uPA are shown.

959  
960

Fig 5

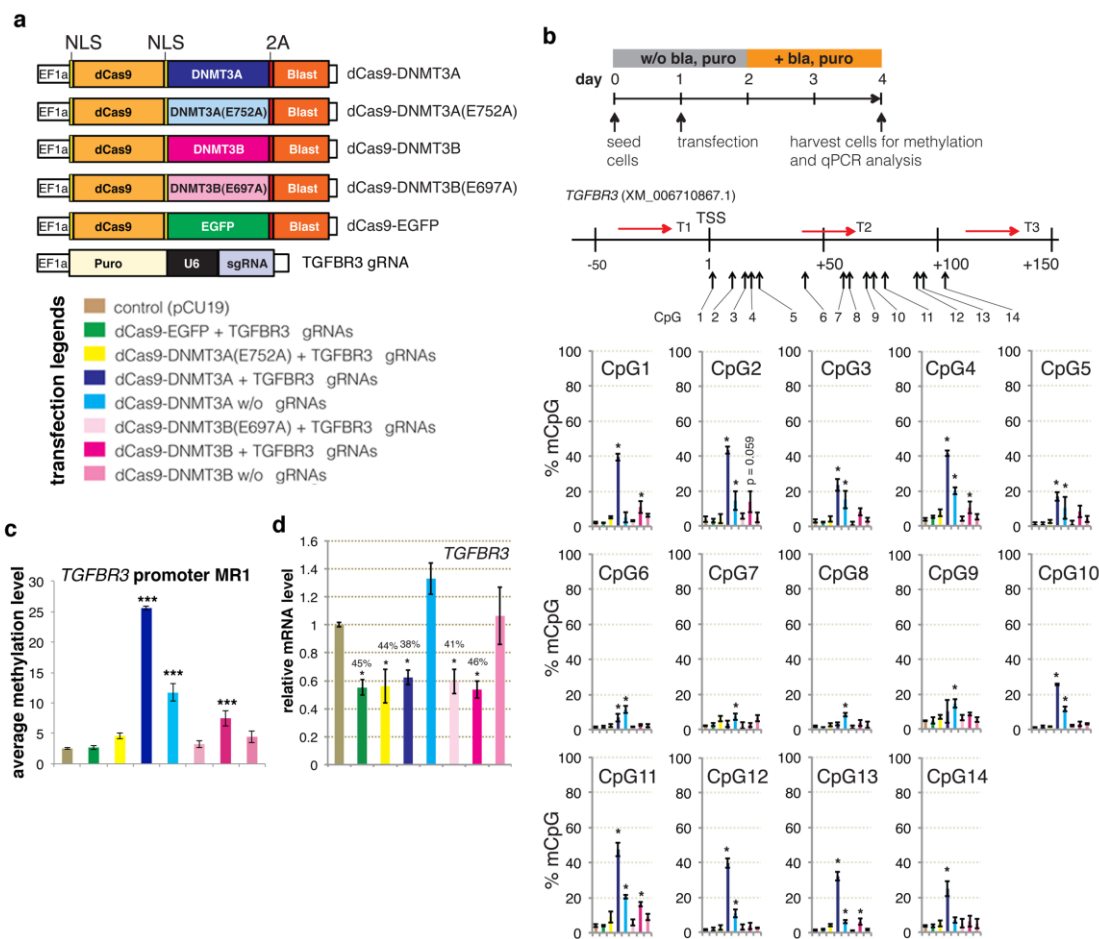

961  
962

**Fig. 5 Generation and validation of CRISPRme 2.0**

963 (a) (top) Schematic illustration of CRISPRme 2.0 expression vectors encoding dCas9 flanked by  
964 nuclear localization signals (NLS) and fused to (i) a DNMT3A or DNMT3B catalytic domain, (ii) a  
965 DNMT3A (E752A) or DNMT3B (E697A) catalytically inactivated domain, or (iii) EGFP, and a  
966 blasticidin resistance gene. Expression of the fusion proteins was constitutively driven by the  
967 elongation factor-1 alpha (EF1a) promoter. (bottom) Legends for different transfection groups  
968 used in (b-d). (b) (top) Schematic illustration of the experiment and the TGFBFR3 promoter with  
969 gRNA target sites and CpGs used for subsequent analysis by pyrosequencing. CRISPRme- and  
970 gRNA-expressing cells were enriched by blasticidin (10 ug/mL) and puromycin (10 ug/mL)  
971 antibiotic selection. (bottom) Bar charts depicting % mCpG for individual TGFBFR3 CpG sites in

1  
2  
3  
4  
5  
6  
7  
8  
9  
10  
11  
12  
13  
14  
15  
16  
17  
18  
19  
20  
21  
22  
23  
24  
25  
26  
27  
28  
29  
30  
31  
32  
33  
34  
35  
36  
37  
38  
39  
40  
41  
42  
43  
44  
45  
46  
47  
48  
49  
50  
51  
52  
53  
54  
55  
56  
57  
58  
59  
60  
61  
62  
63  
64  
65

972 cells expressing CRISPRme2.0 or CRISPRme2.0 mutants with or without *TGFBR3* gRNAs. Cells  
973 transfected with pUC19 or a dCas9-EGFP fusion were used as negative controls. (c) Bar chart  
974 illustrating average methylation levels of *TGFBR3-MR1*. (d) Bar chart illustrating relative *TGFBR3*  
975 mRNA levels compared to pUC19. % mCpG and relative gene expression values are presented  
976 as mean  $\pm$  SD (n = 3 independent transfections). Asterisks represent P value < 0.05 (\*) and <  
977 0.001 (\*\*\*)(ANOVA). Percentage decrease in gene expression levels compared to pUC19 are  
978 presented on top of bars in (d).  
979

Fig 6

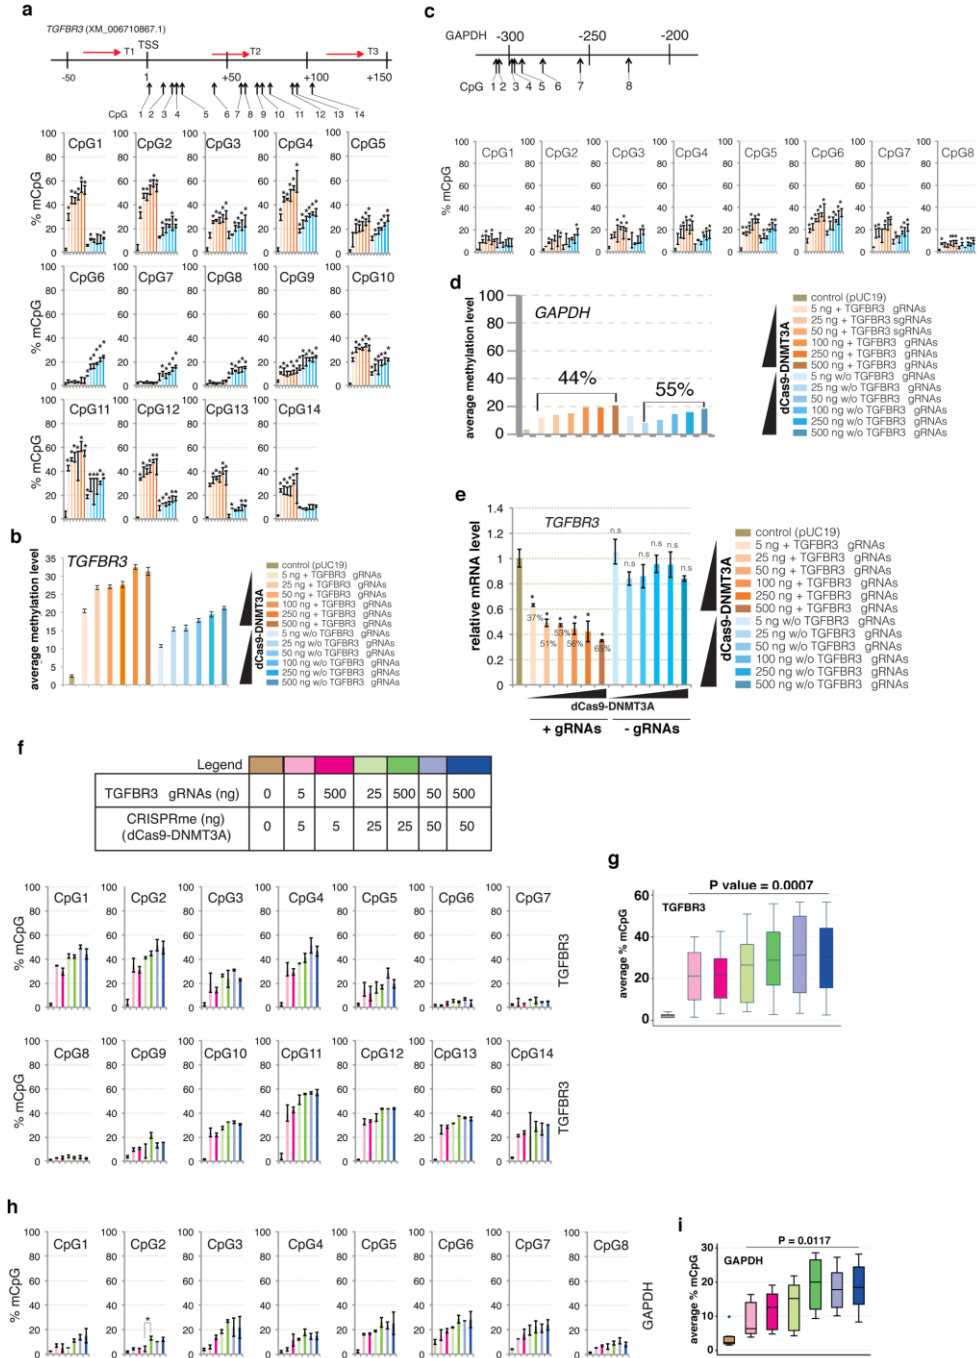

Fig. 6. Effects of titrating the amount of CRISPRme 2.0 and gRNA plasmids on on-target and off-target methylation

(a-b) Bar charts illustrating % mCpG levels for the 14 individual *TGFBR3* CpG sites (a) and the average methylation level for all 14 CpG sites (b) in HEK293T cells expressing various amounts (5, 25, 50, 100, 250, and 500 ng) of the dCas9-DNMT3A plasmid with or without (w/o) *TGFBR3*

1  
2  
3  
4  
5  
6  
7  
8  
9  
10  
11  
12  
13  
14  
15  
16  
17  
18  
19  
20  
21  
22  
23  
24  
25  
26  
27  
28  
29  
30  
31  
32  
33  
34  
35  
36  
37  
38  
39  
40  
41  
42  
43  
44  
45  
46  
47  
48  
49  
50  
51  
52  
53  
54  
55  
56  
57  
58  
59  
60  
61  
62  
63  
64  
65

986 gRNAs (500 ng). **(c-d)** Bar charts illustrating % mCpG levels for individual CpG sites **(c)** or  
987 average methylation levels **(d)** in the *GAPDH* promoter in cells expressing different levels (5, 25,  
988 50, 100, 250, and 500 ng) of dCas9-DNMT3A with or without *TGFBR3* gRNAs (500 ng). Cells  
989 transfected with pUC19 were used as controls. Asterisk (\*) indicates statistical significance ( $p <$   
990 0.05, ANOVA) after Bonferroni correction. **(e)** Bar charts of relative *TGFBR3* mRNA levels  
991 compared to control cells transfected with pUC19. Both CpG methylation and gene expression  
992 data represent mean  $\pm$  SD ( $n = 3$  independent transfections). Asterisk (\*) indicates statistical  
993 significance ( $P$  value  $< 0.05$ , ANOVA) after Bonferroni correction. **(f) (top)** Transfection legend.  
994 HEK293T cells were co-transfected with various amounts of dCas9-DNMT3A (5, 25, and 50 ng)  
995 and the *TGFBR3* gRNAs (5, 25, 50, and 500 ng). **(bottom)**, bar charts of % mCpG for individual  
996 CpG sites in the *TGFBR3* promoter (*TGFBR3*-DMR1). **(g)** Box plot of the average of % mCpG for  
997 all 14 CpG sites in the *TGFBR3* promoter for each experimental group. **(h)** Bar charts illustrating  
998 % mCpG for individual CpG sites in the *GAPDH* promoter. **(i)** Box plot of the average % mCpG  
999 for all 8 CpG sites in the *GAPDH* promoter for each experimental group. Figures **(f, h)** are plotted  
1000 as mean  $\pm$  SD ( $n = 2$ , independent transfections). **(g, i)**  $P$  values are from Wilcoxon matched-  
1001 pairs signed-rank tests between the 5 ng and 500 ng experimental groups.



Fig. 7

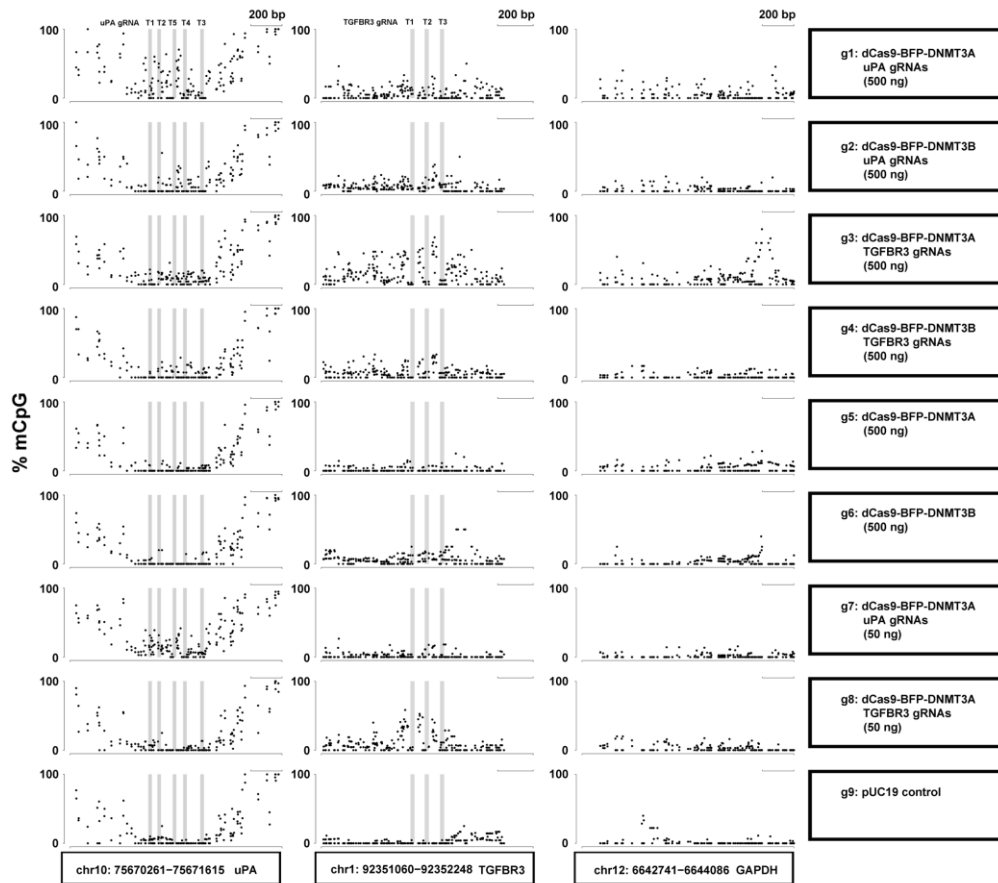

1004  
1005 **Fig. 7 De novo methylation of *uPA*, *TGFBR3* and *GAPDH* promoters by CRISPRme 1.0.** Dot  
1006 plots of % mCpG for individual CpG sites in the *uPA*, *TGFBR3* and *GAPDH* promoter regions.  
1007 Each dot represents one CpG site. Right panel indicates the treatment of cells (transfected  
1008 plasmids). mCpG levels were quantified by WGBS. Scale bar, 200 bp.

1010  
1011

Fig. 8

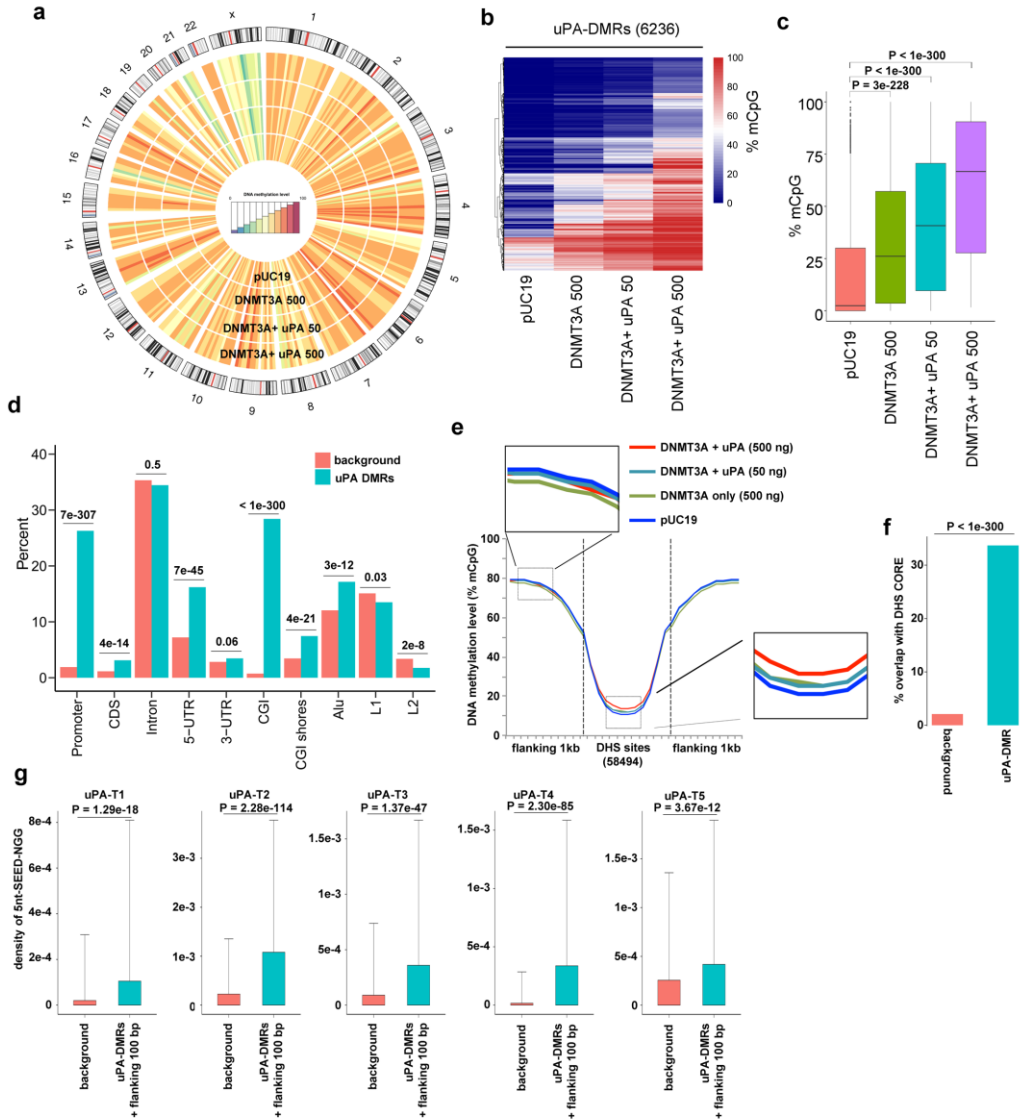

Fig. 8 Effect of overexpressing dCas9-BFP-DNMT3A and uPA gRNAs on global DNA methylation

(a) Circular plot of average methylation of 289 10Mb-genomic windows in cells transfected with either pUC19, 500 ng of dCas9-BFP-DNMT3A (DNMT3A 500), 50 ng each of dCas9-BFP-DNMT3A and uPA gRNAs (DNMT3A + uPA 50), or 500 ng each of dCas9-BFP-DNMT3A and uPA gRNAs (DNMT3A + uPA 500). (b) Heatmap clustering of the hypermethylated DMRs resulted from expressing high amount of 500 ng each of dCas9-BFP-DNMT3A and uPA gRNAs (DNMT3A + uPA 500) (denoted uPA-DMRs, n = 6236). (c) Box plot of uPA-DMRs methylation

1  
2  
3  
4  
5  
6  
7  
8  
9  
10  
11  
12  
13  
14  
15  
16  
17  
18  
19  
20  
21  
22  
23  
24  
25  
26  
27  
28  
29  
30  
31  
32  
33  
34  
35  
36  
37  
38  
39  
40  
41  
42  
43  
44  
45  
46  
47  
48  
49  
50  
51  
52  
53  
54  
55  
56  
57  
58  
59  
60  
61  
62  
63  
64  
65

1021 levels. P values (t-test) are given above the plot. (d) Bar chart illustrating the percentage of the  
1022 identified uPA-DMRs that fall into the different types of genomic regions indicated. Background  
1023 represents the percentage of a random sample of the same number of similar sized genomic  
1024 windows that fall into the categories indicated. Values above bars are P values between  
1025 background and uPA-DMRs, Fisher's exact test. (e) Metaplot of average CpG methylation levels  
1026 in 58,494 DNase I hypersensitive sites (DHS) and 1 kb upstream and downstream flanking  
1027 regions. (f) Bar chart of % uPA-DMRs falling into DHS core regions. (g) Density of 5nt-SEED-  
1028 NGG for uPA gRNAs (T1 to T5) in background genomic windows and uPA-DMRs + flanking 100  
1029 bp. Values represent median density with one standard deviation. P values (t-test) are given  
1030 above the bar charts.  
1031

Fig. 9

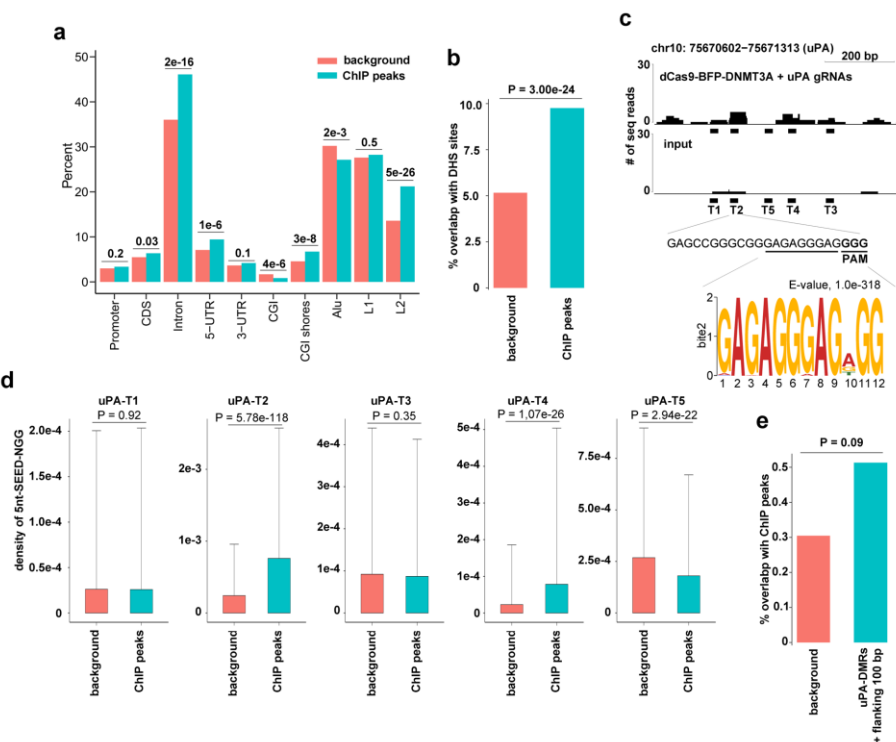

1032  
1033 **Fig. 9 Correlation between CRISPR off-target binding identified by ChIP-seq and off-target**  
1034 **methylation revealed by WGBS**

1035 (a) Bar chart illustrating the percentage of ChIP peaks from cells expressing dCas9-BFP-  
1036 DNMT3A and uPA gRNAs or background control regions (random sampling of the same number  
1037 of similar sized genomic windows as the ChIP peaks) falling into the different types of genomic  
1038 regions indicated. P-values between background and ChIP peaks indicated above bars, Fisher's  
1039 exact test. (b) Bar chart of % ChIP-peaks falling into DHS core regions. (c) Representative plot of

1  
2  
3  
4 1040 ChIP-seq reads in the uPA promoter, uPA gRNA T2 sequences, and the top motif identified by  
5 1041 MEME-ChIP. (d) Density of 5nt-SEED-NGG for uPA gRNAs (T1 to T5) ChIP peaks. Background  
6 1042 is a random sample of the same number of similar sized genomic windows as ChIP peaks.  
7 1043 Values represent median density with one standard deviation. P values are given for the indicated  
8 1044 comparisons, t-test. (e) Bar plot of % uPA-DMRs overlapping with ChIP peaks. Background is a  
9 1045 random sample of the same number of similar sized genomic windows as uPA-DMRs.  
10 1046  
11  
12  
13  
14  
15  
16  
17  
18  
19  
20  
21  
22  
23  
24  
25  
26  
27  
28  
29  
30  
31  
32  
33  
34  
35  
36  
37  
38  
39  
40  
41  
42  
43  
44  
45  
46  
47  
48  
49  
50  
51  
52  
53  
54  
55  
56  
57  
58  
59  
60  
61  
62  
63  
64  
65

1047 **Supplementary Figure Legends**

1048

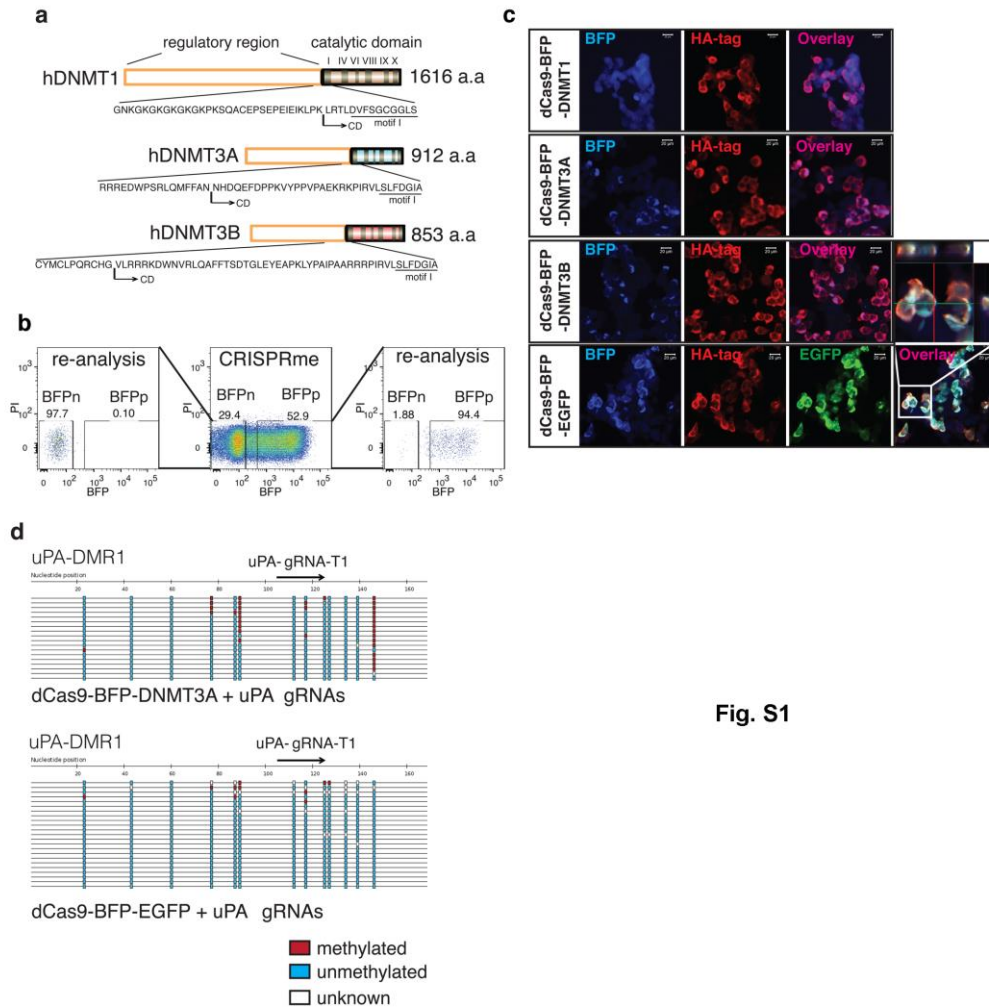

Fig. S1

1049 **Supplementary Fig. 1 Validation of CRISPRme expression and *uPA* promoter methylation**

1050  
 1051 (a) Schematic overview of the human DNA methyltransferases (DNMT1, DNMT3A and DNMT3B)  
 1052 with the N-terminal regulatory region, a C-terminal catalytic domain (CD), and the cytosine C5-  
 1053 DNA methyltransferase motifs highlighted. The first amino acid (a.a) residue of the C-terminal  
 1054 catalytic domain, which was fused to the dCas9, is indicated by an arrow. (b) Representative  
 1055 FACS sorting and Re-analysis of HEK293T cells 48 hours after CRISPRme transfection. Gating  
 1056 for BFP positive (BFPp) and negative (BFPn) cells are indicated. (c) Laser scanning microscopy  
 1057 of CRISPRme expression in HEK293T cells, 48 hours after transfection. The BFP signal from the  
 1058 dCas9-BFP-DNMT1 transfected cells was enhanced since the BFP signal from the dCas9-BFP-  
 1059 DNMT1 fusion was initially weaker compared to that from the other three fusion proteins. Scale

1  
2  
3  
4  
5  
6  
7  
8  
9  
10  
11  
12  
13  
14  
15  
16  
17  
18  
19  
20  
21  
22  
23  
24  
25  
26  
27  
28  
29  
30  
31  
32  
33  
34  
35  
36  
37  
38  
39  
40  
41  
42  
43  
44  
45  
46  
47  
48  
49  
50  
51  
52  
53  
54  
55  
56  
57  
58  
59  
60  
61  
62  
63  
64  
65

1060 bar: 20  $\mu$ m. **(d)** Validation of RNA-guided *uPA* methylation (uPA-MR1) by dCas9-BFP-DNMT3A  
1061 using bisulfite Sanger sequencing.

1062

Supplementary Fig. 2

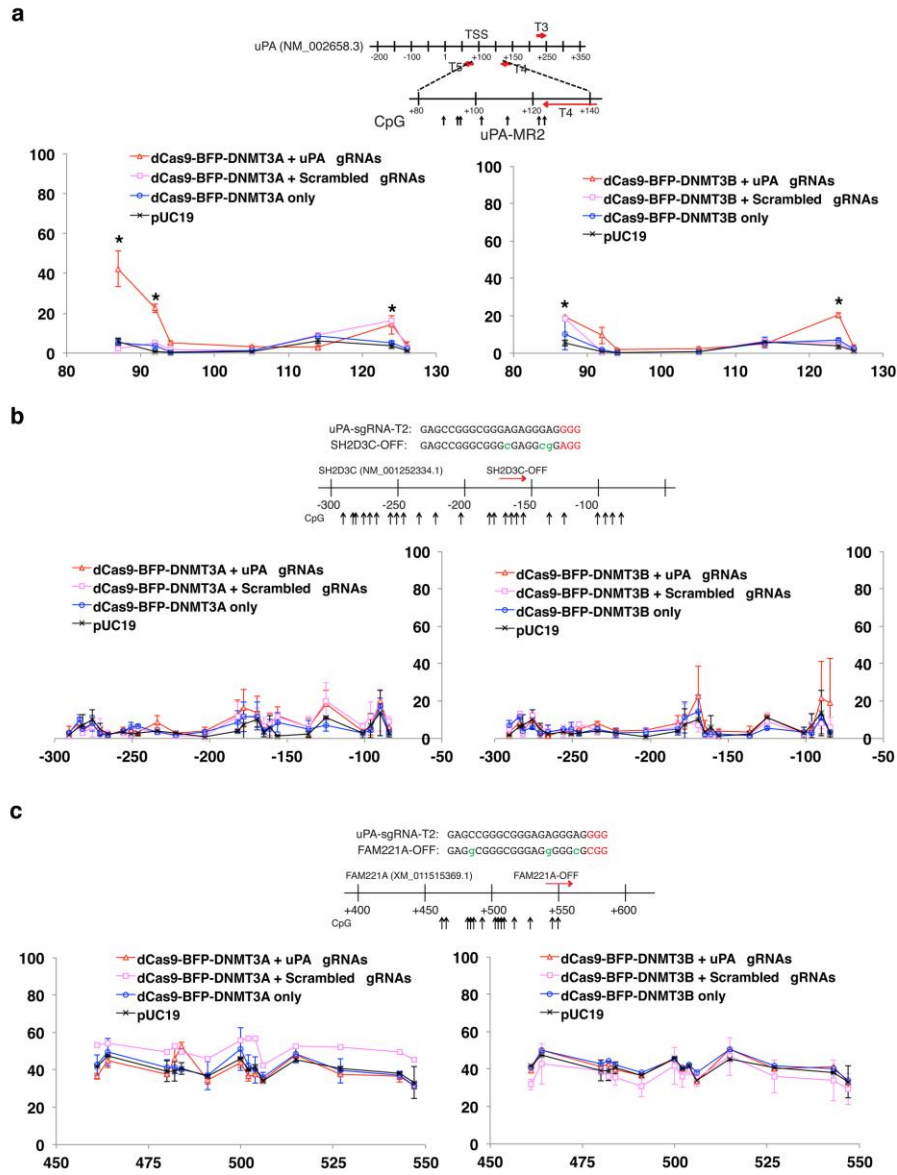

1063

1064

1065

Supplementary Fig. 2 Validation of de novo methylation of uPA by CRISPRme and effect of CRISPRme on two potential off-target sites (*SH2D3C* and *FAM221A*).

1  
2  
3  
4  
5  
6  
7  
8  
9  
10  
11  
12  
13  
14  
15  
16  
17  
18  
19  
20  
21  
22  
23  
24  
25  
26  
27  
28  
29  
30  
31  
32  
33  
34  
35  
36  
37  
38  
39  
40  
41  
42  
43  
44  
45  
46  
47  
48  
49  
50  
51  
52  
53  
54  
55  
56  
57  
58  
59  
60  
61  
62  
63  
64  
65

1066 (a) Line plots of uPA-MR2 methylation in cells transfected with pUC19 (control), dCas9-BFP-  
1067 DNMT3A or dCas9-BFP-DNMT3A only, and dCas9-BFP-DNMT3A or dCas9-BFP-DNMT3A  
1068 together with either *uPA* gRNAs or scrambled gRNAs. (b-c) Schematic illustration of the *SH2D3C*  
1069 (b) and *FAM221A* (c) off-target loci, with off-target sites indicated by red arrows. Sequences of  
1070 *uPA* gRNA (T2), *SH2D3C*, and *FAM221A* off-target sites are given above, with the PAM (red  
1071 letters) and mismatches (green letters) indicated. CpGs analyzed are indicated by black arrows;  
1072 numbers indicate distances (in bp) from the transcription start site (TSS) of the gene (*SH2D3C*,  
1073 NM\_001252334.1) or (*FAM221A*, XM\_011515369.1). Y-axis represents % mCpG level for each  
1074 CpG site and X-axis represents distance (in bp) from TSS. The CpG methylation level from the  
1075 control samples (pUC19 transfection) was re-plotted as a reference. Each data point in the graph  
1076 represents the mean percentage of CpGs methylated  $\pm$  SD (n = 2, independent transfections).  
1077



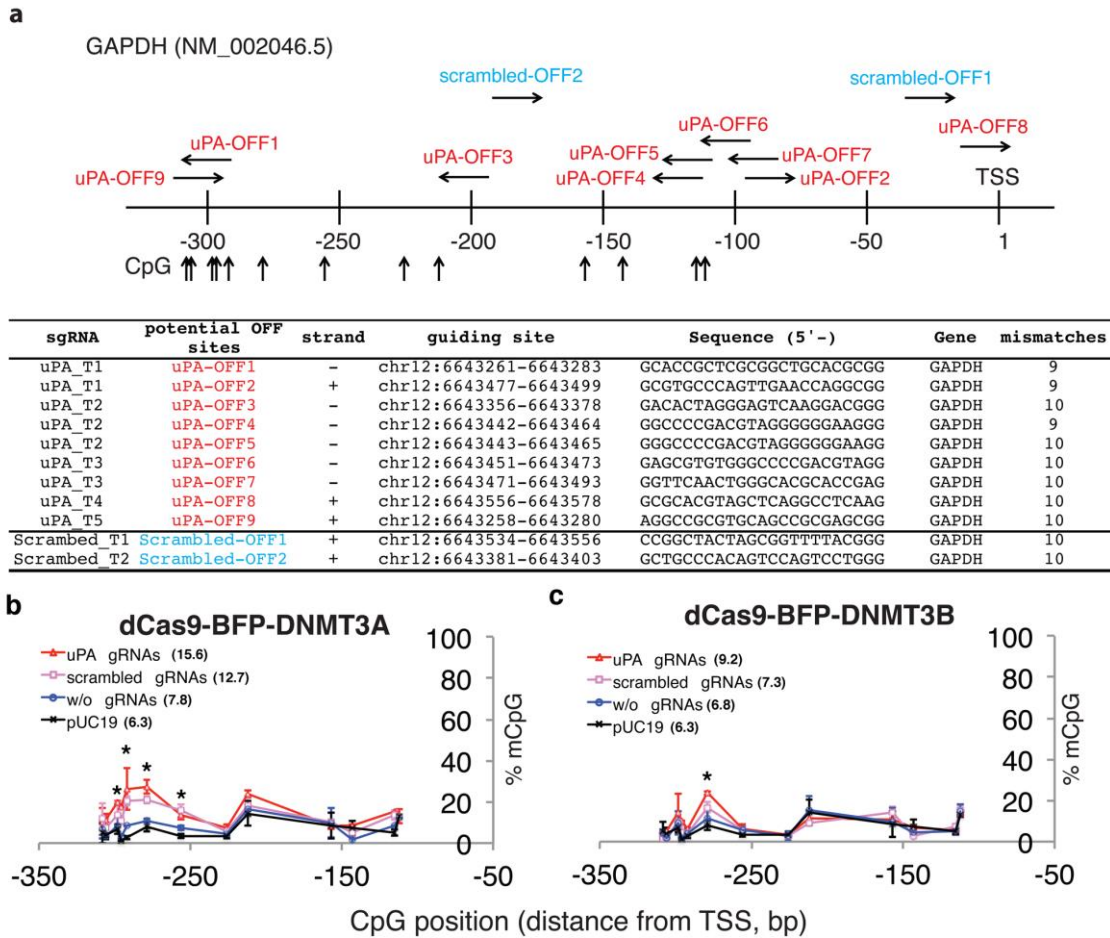

**Fig S3**

**Supplementary Fig. 3 Effects of expressing CRISPRme and uPA gRNAs on GAPDH promoter methylation**

(a) Schematic illustration of the *GAPDH* promoter. Potential off target sites and CpGs analyzed by bisulfite pyrosequencing are indicated. Sequences of the *uPA* or scrambled gRNAs with maximum 10 mismatches are listed. (b-c) Line plots *GAPDH* promoter methylation in FACS-sorted BFPp HEK293T cells 48 hours after transfection with dCas9-BFP-DNMT3A (b) or dCas9-BFP-DNMT3B (c), alone or together with either scrambled or *uPA* gRNAs. The methylation profiles from the pUC19-transfected samples were re-plotted as reference. Each data point in the

1  
2  
3  
4 1087  
5 1088  
6 1089  
7 1090  
8 1091

graph represents the mean  $\pm$  SD ( $n = 2$ , independent transfections). Mean methylation levels for all CpGs analyzed are presented next to line legends. Asterisks (\*) represent P value  $< 0.05$  compared to pUC19, ANOVA.

Fig S4

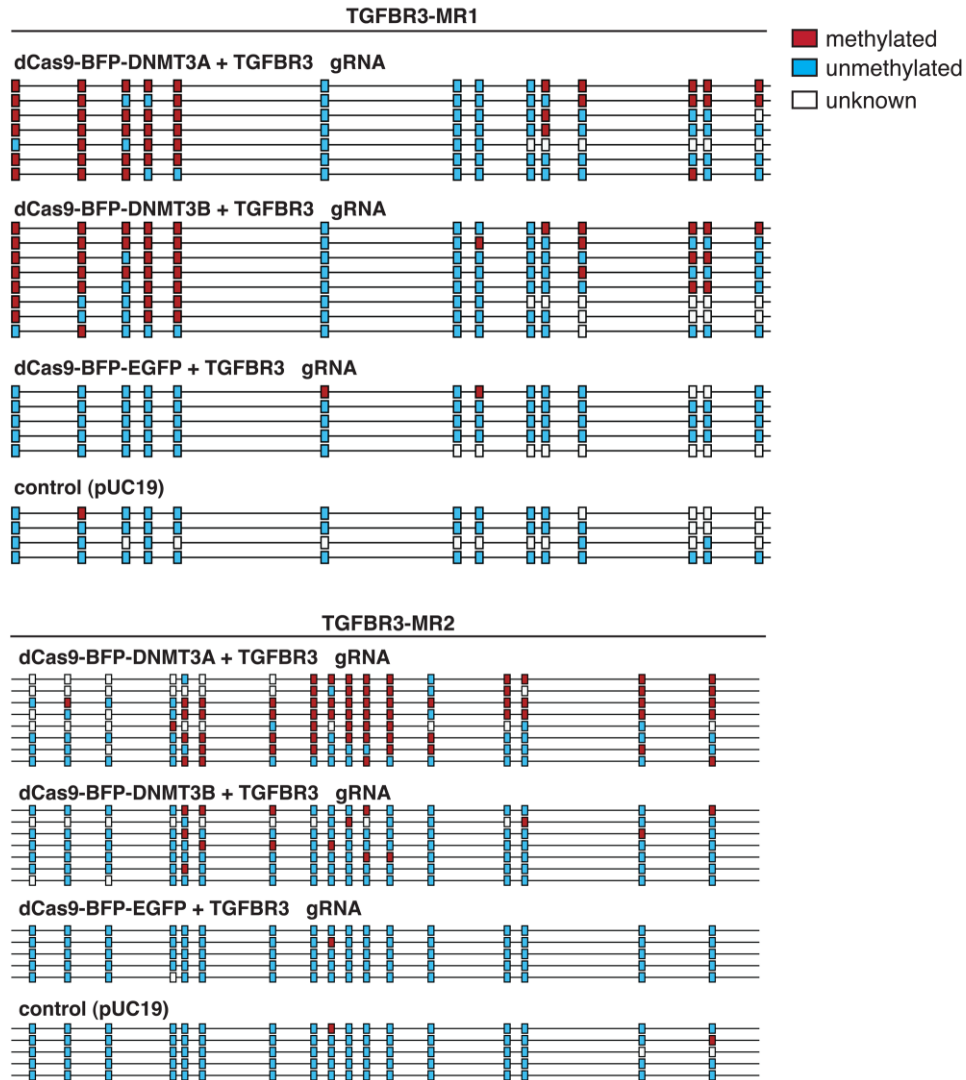

1092  
1093  
1094  
1095  
1096  
1097  
1098  
1099

**Supplementary Fig. 4 Validation of CRISPRme-mediated *TGFBR3* methylation in HEK293T cells by bisulfite Sanger sequencing**

*TGFBR3* methylation by CRISPRme was validated by bisulfite Sanger sequencing. CpG methylation status is indicated according to the absolute nucleotide position and color-coded as red, methylated; blue, unmethylated; or white, unknown methylation state based on the sequencing signal.

1100

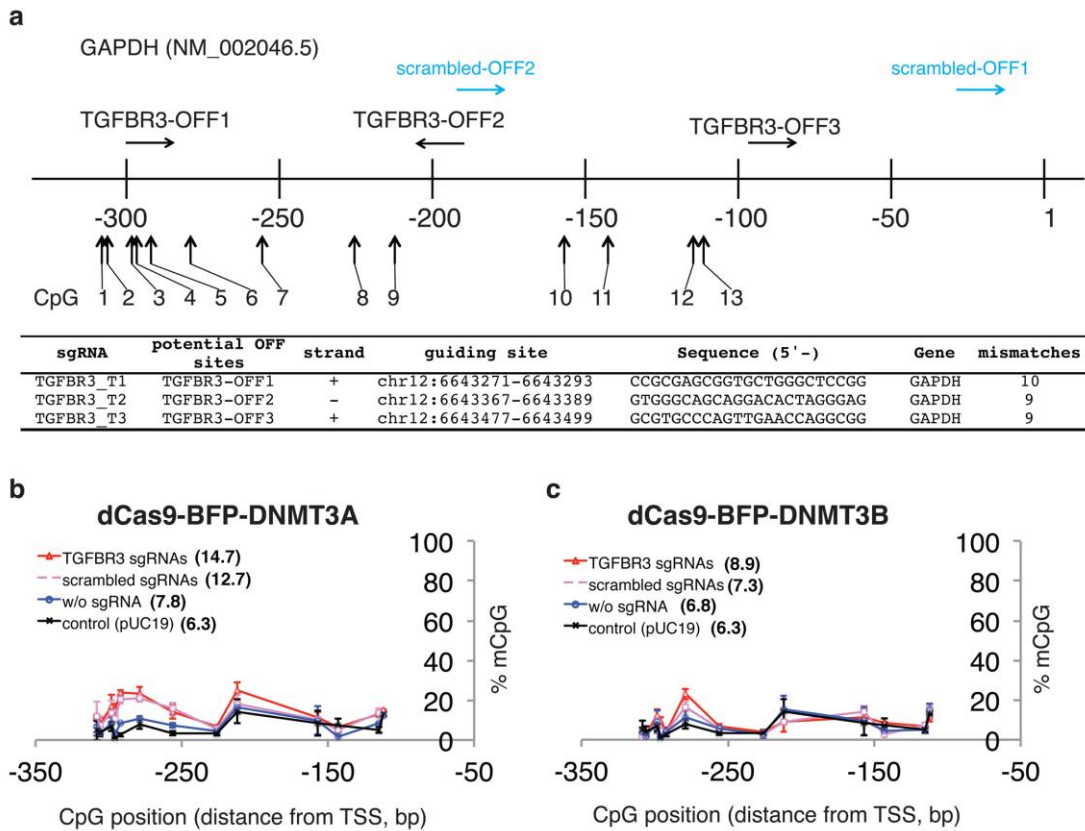

**Fig S5**

**Supplementary Fig. 5 Effects of expressing CRISPRme and *TGFBR3* gRNAs on *GAPDH* promoter methylation**

(a) Schematic illustration of the *GAPDH* promoter, potential off-target sites of *TGFBR3* gRNAs and scrambled gRNAs, and the CpGs analyzed by bisulfite pyrosequencing. Percentage of CpGs methylated within the *GAPDH* promoter was analyzed in the CRISPRme-expressing HEK293T cells. The BFP positive cells were FACS-sorted 48 hours after co-transfection with the *TGFBR3* or scrambled gRNAs and either dCas9-BFP-DNMT3A (b) or dCas9-BFP-DNMT3B (c). Note that data points for groups with scrambled gRNAs, without (w/o) gRNAs and with pUC19 are re-plotted from **Supplementary Fig. 3** for reference. Each data point in the graph represents the mean  $\pm$  SD (n = 2, independent transfections). Mean methylation levels for all CpGs analyzed are

1112 presented next to line legends. (c) Schematic plot of PAM (NGG) and CpG sites in the *GAPDH*  
 1113 promoter.  
 1114

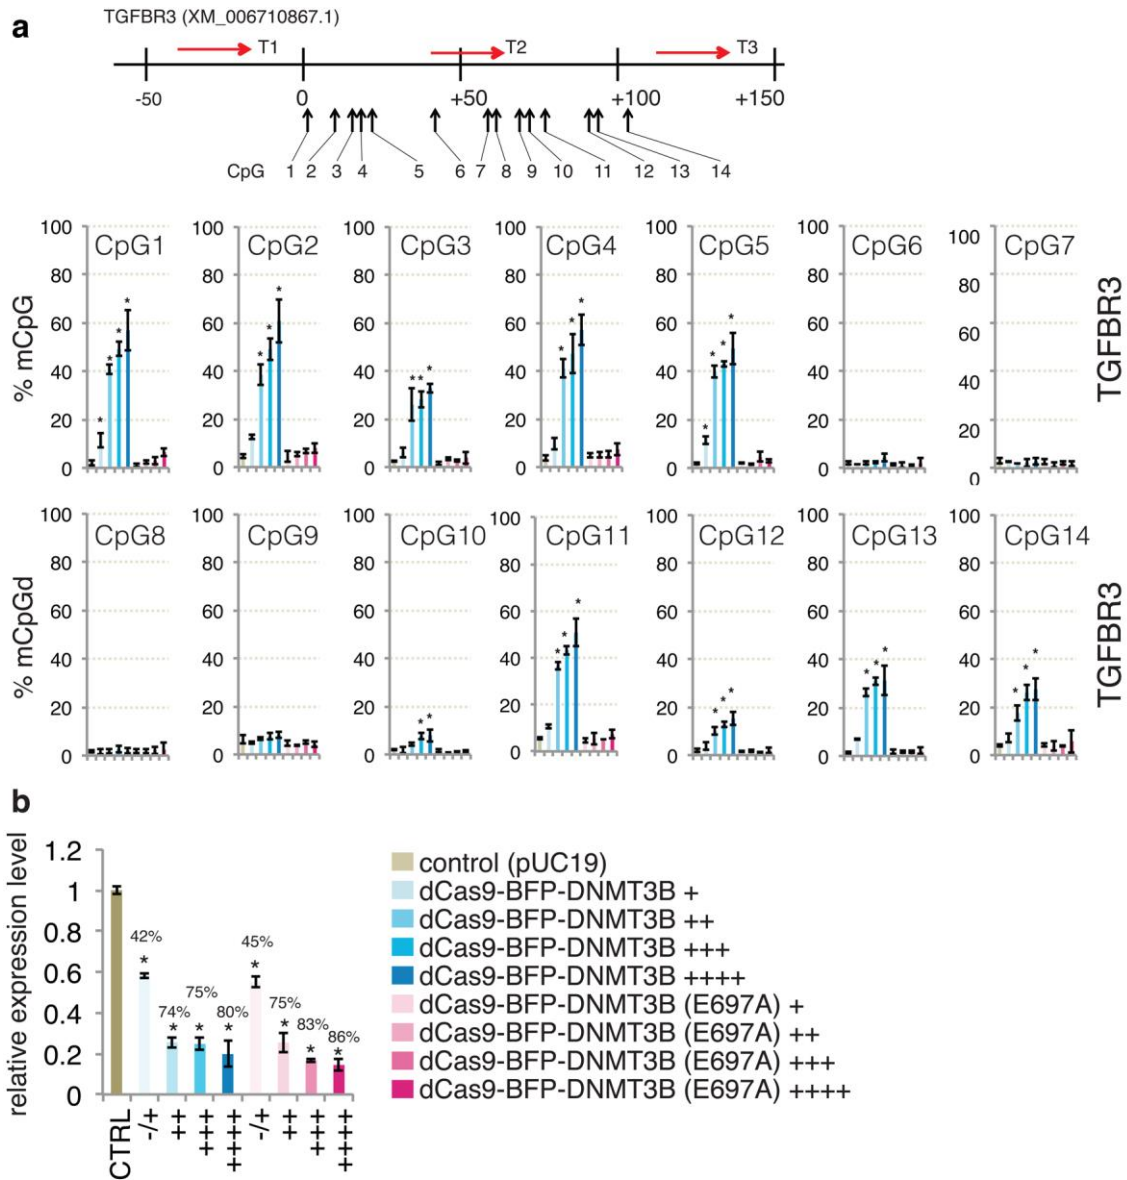

Fig S6

1115  
 1116 **Supplementary Fig. 6 Evaluation of *De novo* *TGFBR3* methylation and expression**  
 1117 **inhibition by *TGFBR3* gRNAs together with either dCas9-BFP-DNMT3B or dCas9-BFP-**  
 1118 **DNMT3B (E697A).**

1119 (a) Bar charts of % mCpG level for individual CpG sites of the *TGFBR3* targeted regions in  
 1120 CRISPRme-expressing cells. Cells were enriched by FACS 48 hours after transfection and sorted  
 1121 according to the BPF signal: +, ++, +++, +++++. The schematic illustrations above the bar charts

1  
2  
3  
4  
5  
6  
7  
8  
9  
10  
11  
12  
13  
14  
15  
16  
17  
18  
19  
20  
21  
22  
23  
24  
25  
26  
27  
28  
29  
30  
31  
32  
33  
34  
35  
36  
37  
38  
39  
40  
41  
42  
43  
44  
45  
46  
47  
48  
49  
50  
51  
52  
53  
54  
55  
56  
57  
58  
59  
60  
61  
62  
63  
64  
65

1122 show gRNA binding sites and CpG sites analyzed. **(b)** Bar chart of relative *TGFBR3* expression  
1123 (% of pUC19). Both %mCpG and relative gene expression values represent mean  $\pm$  SD (n = 3,  
1124 independent transfections). Asterisk (\*) indicates statistical significance (p < 0.05, ANOVA)  
1125 compared to the pUC19 control group after Bonferroni correction. Percentage values represent %  
1126 decrease of *TGFBR3* expression compared to pUC19.

1127  
1128

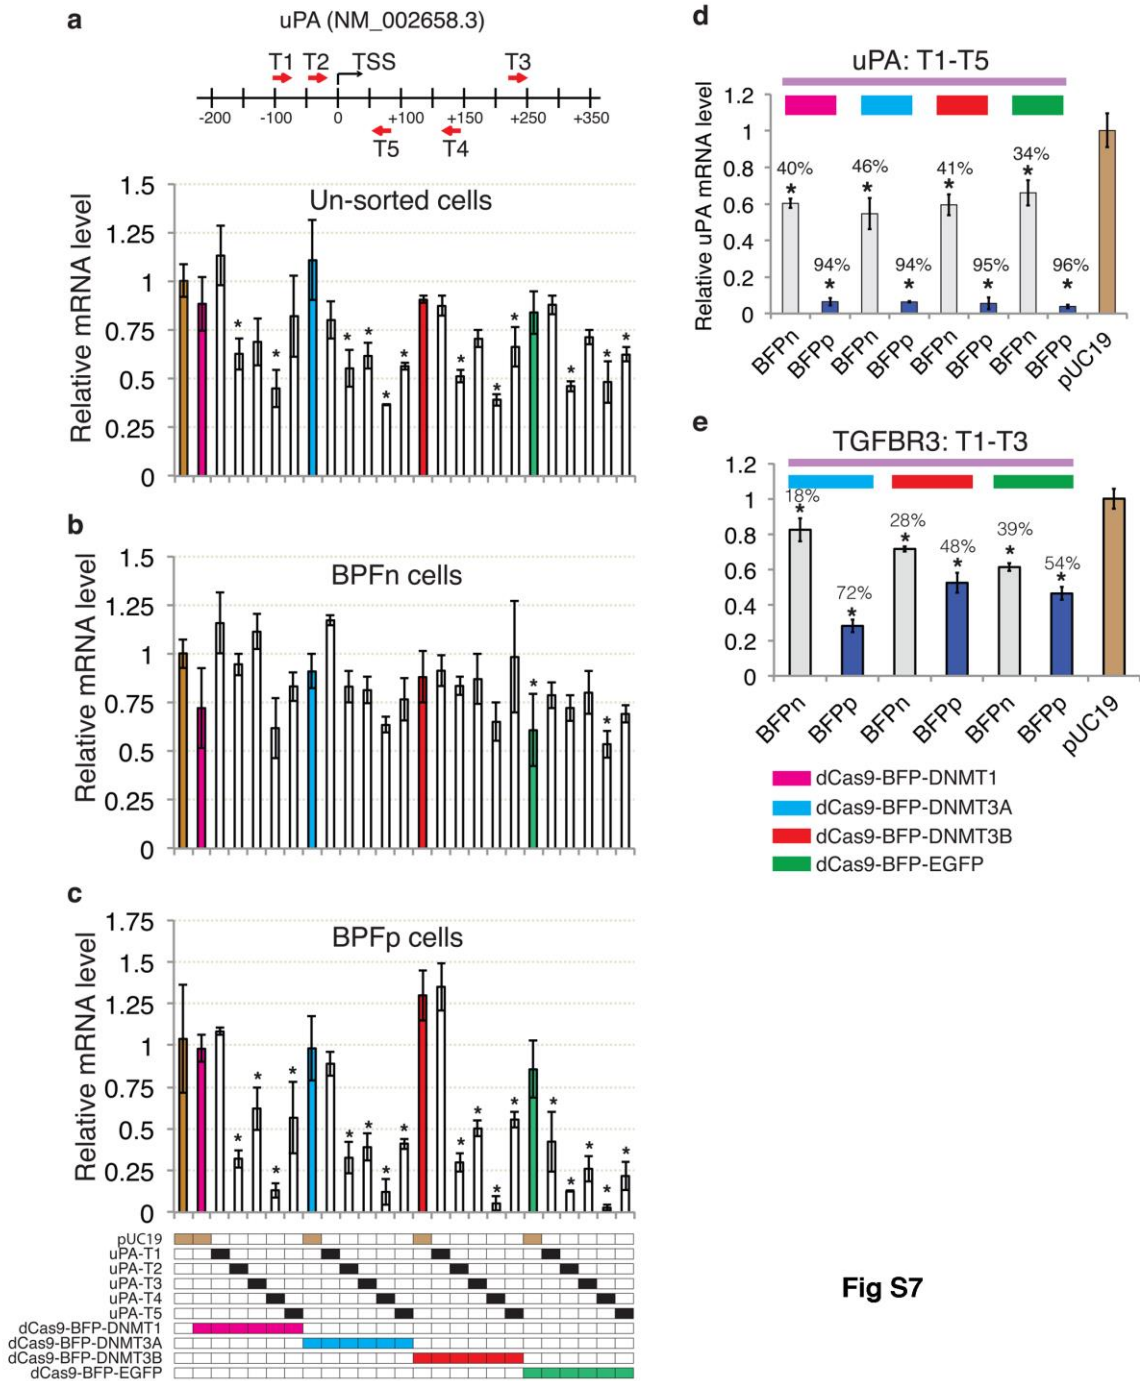

Fig S7

**Supplementary Fig. 7 Inhibition of *uPA* and *TGFB3* expression in HEK293T cells by CRISPRme 1.0 and gRNAs**

Relative *uPA* mRNA level in unsorted (a), FACS-sorted BFP negative (BFPn, b), or BFP positive (BFPp, c) HEK293T cells 48 hours after co-transfection of a single *uPA* gRNA and a dCas9 fusion protein. Note that BFPn groups contain cells with weak BFP signals. The transfection

1  
2  
3  
4  
5  
6  
7  
8  
9  
10  
11  
12  
13  
14  
15  
16  
17  
18  
19  
20  
21  
22  
23  
24  
25  
26  
27  
28  
29  
30  
31  
32  
33  
34  
35  
36  
37  
38  
39  
40  
41  
42  
43  
44  
45  
46  
47  
48  
49  
50  
51  
52  
53  
54  
55  
56  
57  
58  
59  
60  
61  
62  
63  
64  
65

1135 scheme for for the experiment is indicated in the bottom panel of the figure; filled boxes indicate  
1136 the inclusion of the corresponding plasmid in the transfection. **(d-e)** Relative mRNA levels in cells  
1137 expressing the corresponding dCas9 fusion protein and either five *uPA* gRNAs **(d)** or three  
1138 *TGFBR3* gRNAs **(e)**. Relative *uPA* and *TGFBR3* mRNA levels were calculated as fold changes  
1139 compared to the control (pUC19 transfection). Each data point is presented as mean  $\pm$  SD (n = 3,  
1140 independent transfections). Asterisk (\*) indicates a p-value < 0.05 compared to the control  
1141 (pUC19).

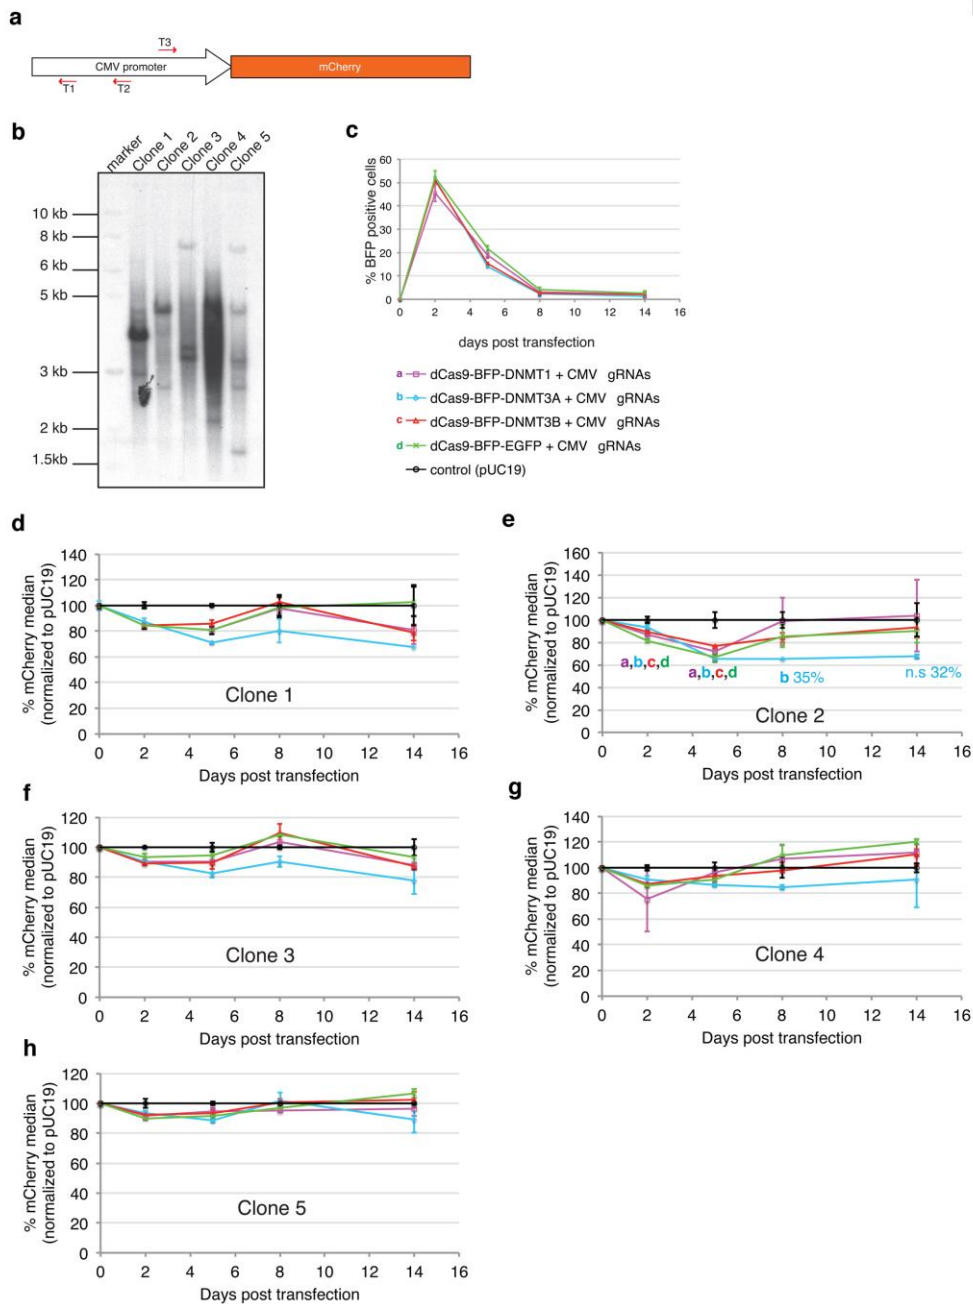

1143  
1144 **Supplementary Fig. 8 Effects of CRISPRme on mCherry expression in fluorescence**  
1145 **reporter cell lines**

1146 (a) Schematic illustration of the mCherry fluorescence transgene expression cassette. The target  
1147 sites of the CRISPRme gRNAs within the CMV promoter are indicated by red arrows (5'-3',  
1148 targeting sense or antisense strands). (b) Southern blot analysis of five cell clones with the  
1149 transgene cassette randomly and stably integrated into the genome. (c) Flow cytometry-based  
1150 analysis of the percentage of BFP positive cells in the fluorescence reporter cells at 2, 5, 8 and 14



1  
2  
3  
4  
5  
6  
7  
8  
9  
10  
11  
12  
13  
14  
15  
16  
17  
18  
19  
20  
21  
22  
23  
24  
25  
26  
27  
28  
29  
30  
31  
32  
33  
34  
35  
36  
37  
38  
39  
40  
41  
42  
43  
44  
45  
46  
47  
48  
49  
50  
51  
52  
53  
54  
55  
56  
57  
58  
59  
60  
61  
62  
63  
64  
65

1151 days after transient transfection with CMV gRNAs (T1-T3) and dCas9-BFP-DNMT1, dCas9-BFP-  
1152 DNMT3A, dCas9-BFP-DNMT3B, or dCas9-BFP-EGFP. (**d-h**) % mCherry fluorescence median  
1153 intensity in these five clones at day 2, 5, 8, and 14 days following transient transfection with CMV  
1154 gRNAs (T1-T3) and dCas9-BFP-DNMT1, dCas9-BFP-DNMT3A, dCas9-BFP-DNMT3B, or  
1155 dCas9-BFP-EGFP. Control cells were transfected with pUC19. Percent inhibition of mCherry  
1156 expression was calculated by normalizing the median mCherry fluorescence intensity to that from  
1157 the pUC19 transfected cells at each time point. Figures are plotted using the mean % mCherry  
1158 median  $\pm$  SD (n = 3, independent transfections). ANOVA with Bonferroni comparison was  
1159 performed for cell clone 2. "a", "b", "c", and "d," indicates a p-value < 0.05 compared to the pUC19  
1160 control for the corresponding CRISPRme transfection group.

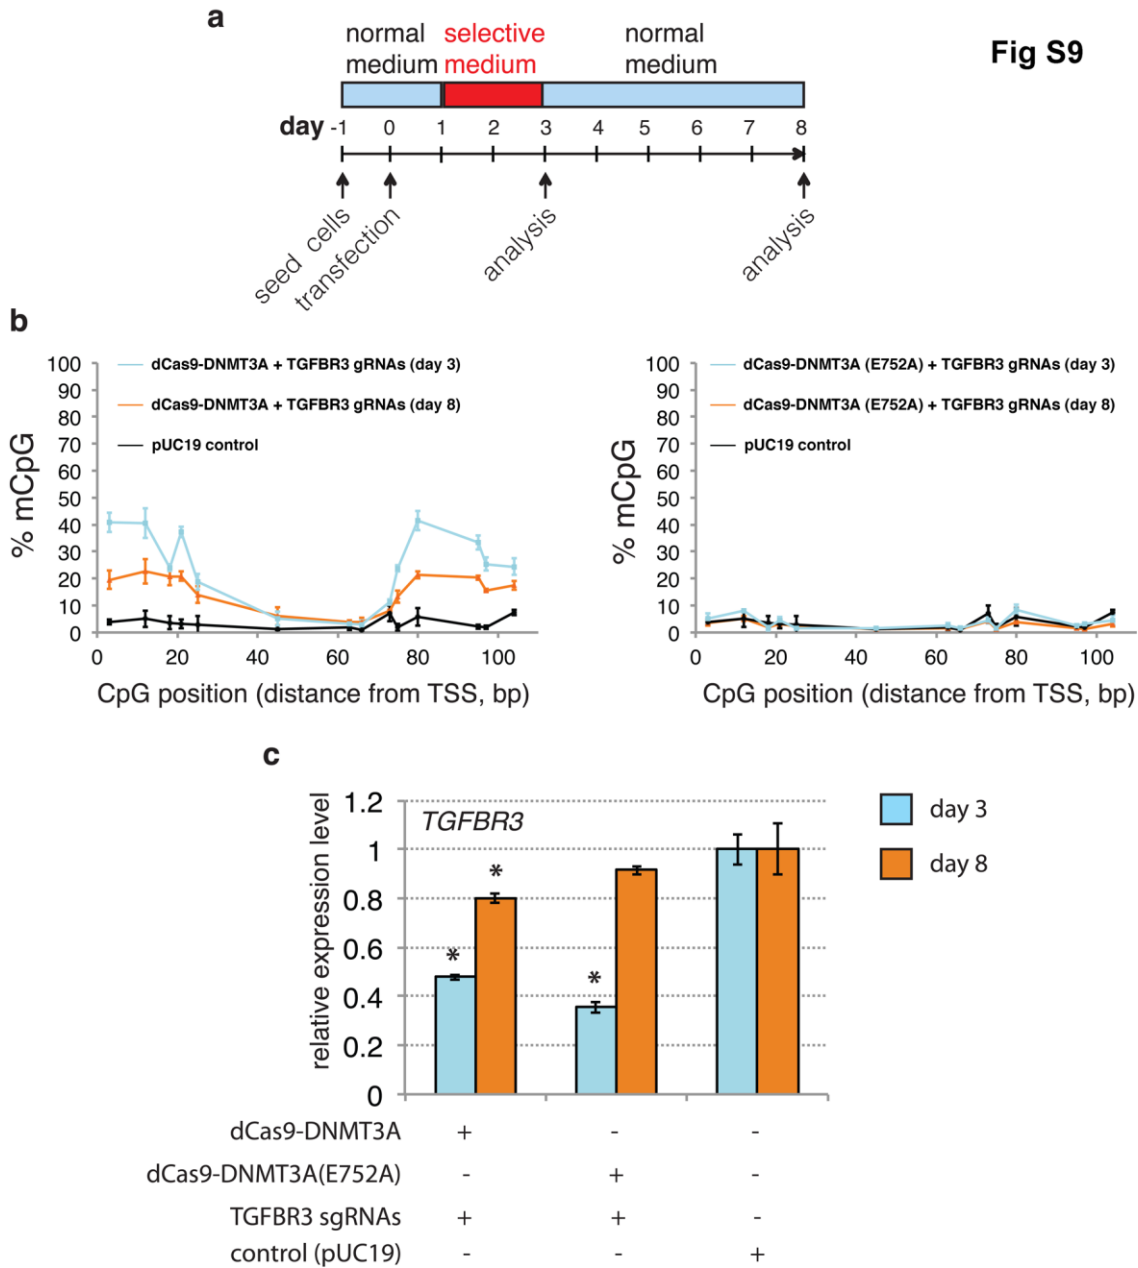

**Supplementary Fig. 9 Determination of long-term methylation and inhibition of *TGFBR3* by CRISPRme2.0**

(a) Schematic representation of the time-course of the experiment. HEK293T cells were transfected with the *TGFBR3* gRNAs and either lenti-dCas9-DNMT3A or lenti-dCas9-DNMT3A (E752A) at day 0, cultured in selective medium from day 1 to day 3, and cultured in non-selective medium from day 3. Control cells were transfected with an identical amount of the pUC19 plasmid. Transfected cells were harvested for methylation analysis of *TGFBR3*-MR1 using bisulfite pyrosequencing (b) and for *TGFBR3* expression analysis (c) at day 3 (blue lines or bars)

1  
2  
3  
4  
5  
6  
7  
8  
9  
10  
11  
12  
13  
14  
15  
16  
17  
18  
19  
20  
21  
22  
23  
24  
25  
26  
27  
28  
29  
30  
31  
32  
33  
34  
35  
36  
37  
38  
39  
40  
41  
42  
43  
44  
45  
46  
47  
48  
49  
50  
51  
52  
53  
54  
55  
56  
57  
58  
59  
60  
61  
62  
63  
64  
65

1172 and day 8 (orange lines or bars). Figures are plotted using mean  $\pm$  SD (n = 3, independent  
1173 transfections). Asterisk (\*) indicates a p-value < 0.05 compared to the control.

1174

1  
2  
3  
4  
5  
6  
7  
8  
9  
10  
11  
12  
13  
14  
15  
16  
17  
18  
19  
20  
21  
22  
23  
24  
25  
26  
27  
28  
29  
30  
31  
32  
33  
34  
35  
36  
37  
38  
39  
40  
41  
42  
43  
44  
45  
46  
47  
48  
49  
50  
51  
52  
53  
54  
55  
56  
57  
58  
59  
60  
61  
62  
63  
64  
65

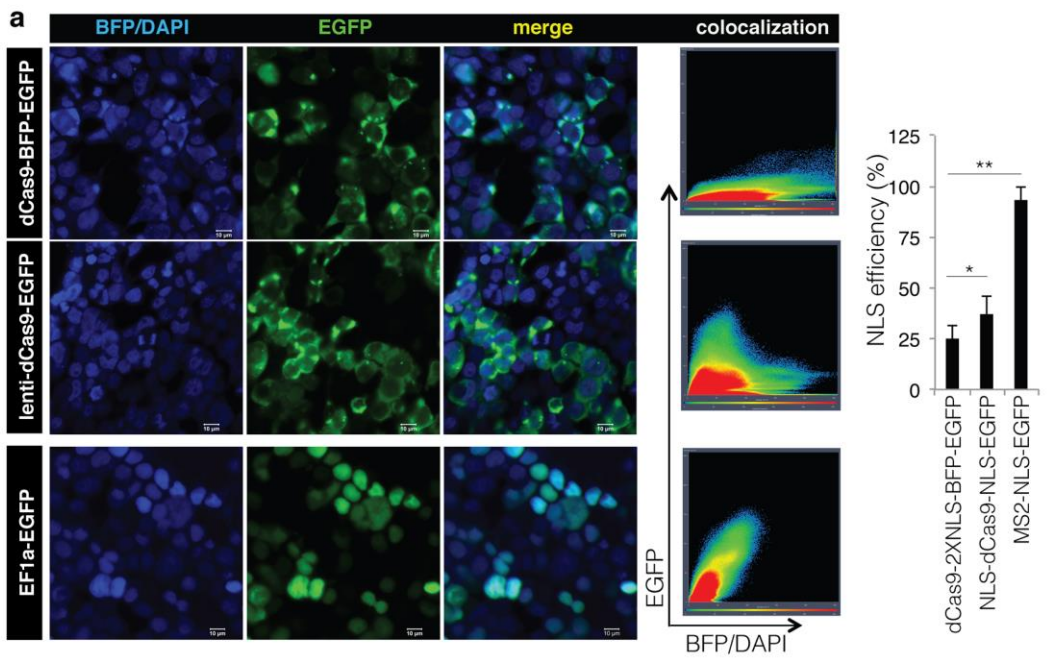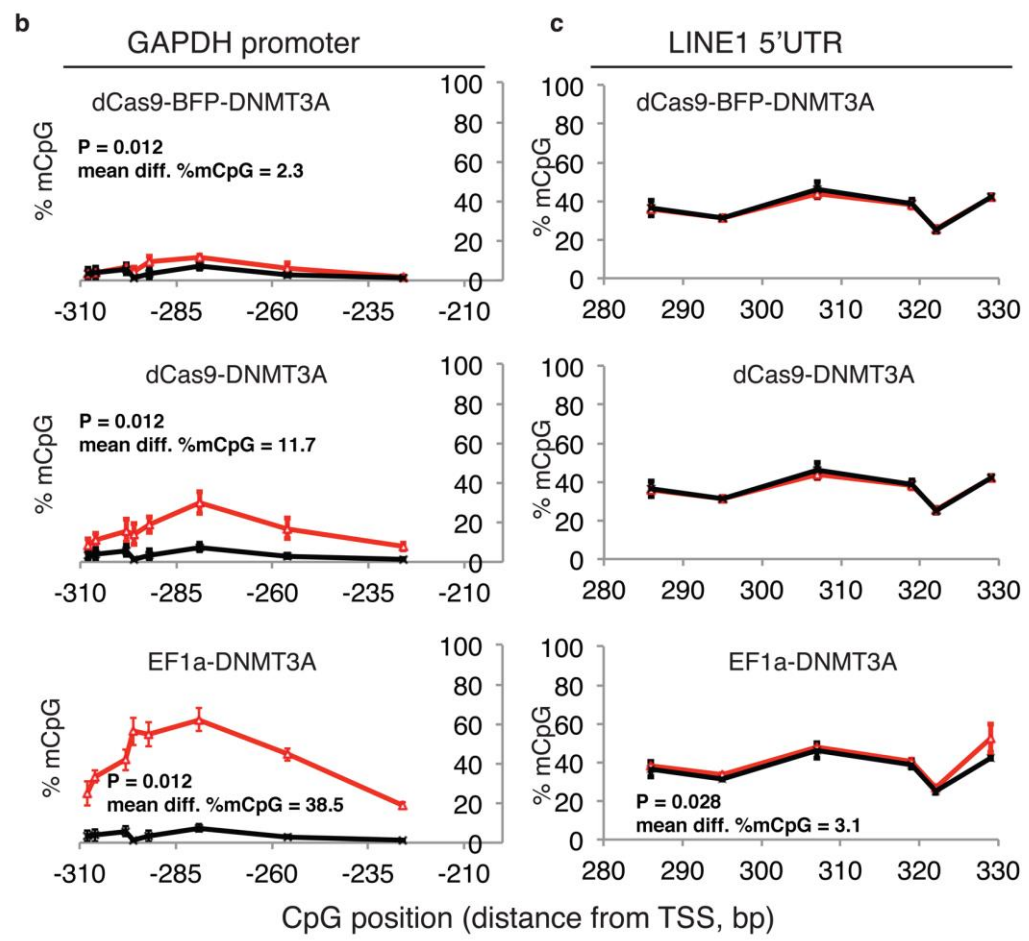

**Fig S10**

1175

1  
2  
3  
4  
5  
6  
7  
8  
9  
10  
11  
12  
13  
14  
15  
16  
17  
18  
19  
20  
21  
22  
23  
24  
25  
26  
27  
28  
29  
30  
31  
32  
33  
34  
35  
36  
37  
38  
39  
40  
41  
42  
43  
44  
45  
46  
47  
48  
49  
50  
51  
52  
53  
54  
55  
56  
57  
58  
59  
60  
61  
62  
63  
64  
65

**Supplementary Fig. 10 Comparison of dCas9 methyltransferase expression, nuclear entry efficiency, and the effects on specificity**

(a) Laser scanning fluorescent microscopy of HEK293T cells expressing three EGFP fusion proteins. NLS, nuclear localization signal; BFP, blue fluorescent protein; MS2, the MS2 bacteriophage coat protein. Co-localization of EGFP and BFP/DAPI is observed. Nuclear localization was estimated using Image J. \*, p-value < 0.05; \*\*, p-value < 0.01 by ANOVA. (b-c) Percentage methylation of *GAPDH* (b) and *LINE1* 5'UTR (c). Each data point is presented as mean ± SD (n = 3, independent transfections). % mCpG levels were analyzed in cells 48 hours after transfection with dCas9-BFP-DNMT3A, lenti-dCas9-DNMT3A, or EF1a-DNMT3A plasmids (500 ng). Cells transfected with an identical amount of the pUC19 plasmid were used as control and re-plotted for the different treatments as reference. Average difference in % mCpG levels between experimental groups and controls are shown together with Wilcoxon matched-pairs signed-rank test P values.

a

| Sample ID | Description                                       | Clean Data Size(bp) | Clean Reads Number | Clean Rate(%) | Mapped Reads | Mapping Rate (%) | Uniquely Mapped Reads | Uniquely Mapping Rate (%) | Bisulfite Conversion Rate (%) |
|-----------|---------------------------------------------------|---------------------|--------------------|---------------|--------------|------------------|-----------------------|---------------------------|-------------------------------|
| g1        | dCas9-BFP-DNMT3A (500 ng) + uPA gRNAs (500 ng)    | 100,601,409,600     | 670,676,064        | 95.06         | 558316453    | 83.25            | 558316453             | 83.25                     | 99.63                         |
| g2        | dCas9-BFP-DNMT3B (500 ng) + uPA gRNAs (500 ng)    | 103,778,694,600     | 691,857,964        | 95.64         | 575422550    | 83.17            | 575422550             | 83.17                     | 99.52                         |
| g3        | dCas9-BFP-DNMT3A (500 ng) + TGFBR3 gRNAs (500 ng) | 117,505,796,100     | 783,371,974        | 94.06         | 651431832    | 83.16            | 651431832             | 83.16                     | 99.65                         |
| g4        | dCas9-BFP-DNMT3B (500 ng) + TGFBR3 gRNAs (500 ng) | 109,001,895,600     | 726,679,304        | 90.65         | 604104613    | 83.13            | 604104613             | 83.13                     | 99.63                         |
| g5        | dCas9-BFP-DNMT3A (500 ng) only                    | 105,265,839,000     | 701,772,260        | 90.36         | 582484794    | 83               | 582484794             | 83                        | 99.62                         |
| g6        | dCas9-BFP-DNMT3B (500 ng) only                    | 118,394,522,400     | 789,296,816        | 95.6          | 660303371    | 83.66            | 660303371             | 83.66                     | 99.6                          |
| g7        | dCas9-BFP-DNMT3A (50 ng) + uPA gRNAs (50 ng)      | 117,366,362,100     | 782,442,414        | 87.18         | 645181340    | 82.46            | 645181340             | 82.46                     | 99.6                          |
| g8        | dCas9-BFP-DNMT3A (50 ng) + TGFBR3 gRNAs (50 ng)   | 101,372,416,500     | 675,816,110        | 85.25         | 561172295    | 83.04            | 561172295             | 83.04                     | 99.49                         |
| g9        | pUC19 control                                     | 80,429,413,800      | 536,196,092        | 90.08         | 444407297    | 82.88            | 444407297             | 82.88                     | 99.46                         |

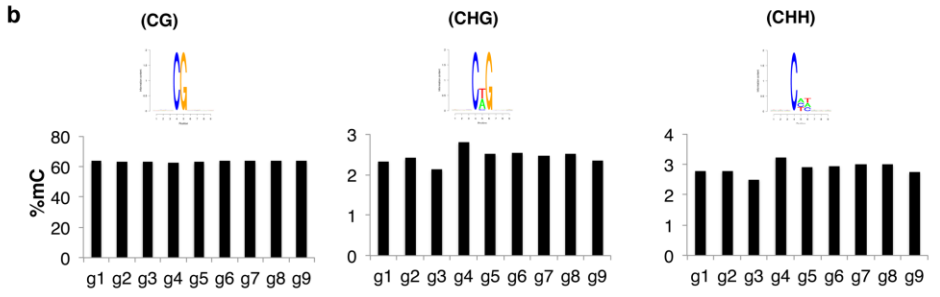

Fig S11

**Supplementary Fig. 11 WGBS analysis of cells expressing CRISPRme1.0 and gRNAs**

(a) Summary of WGBS including clean data, clean reads, clean rate, mapped reads, uniquely mapped reads and rate, and bisulfite conversion rate, for each experimental group and control (pUC19). (b) Average percentage of methylated cytosine (% mC) for whole-genome CpG sites, CHG sites, and CHH sites. “H” represents A, C, and T.

Fig. S12

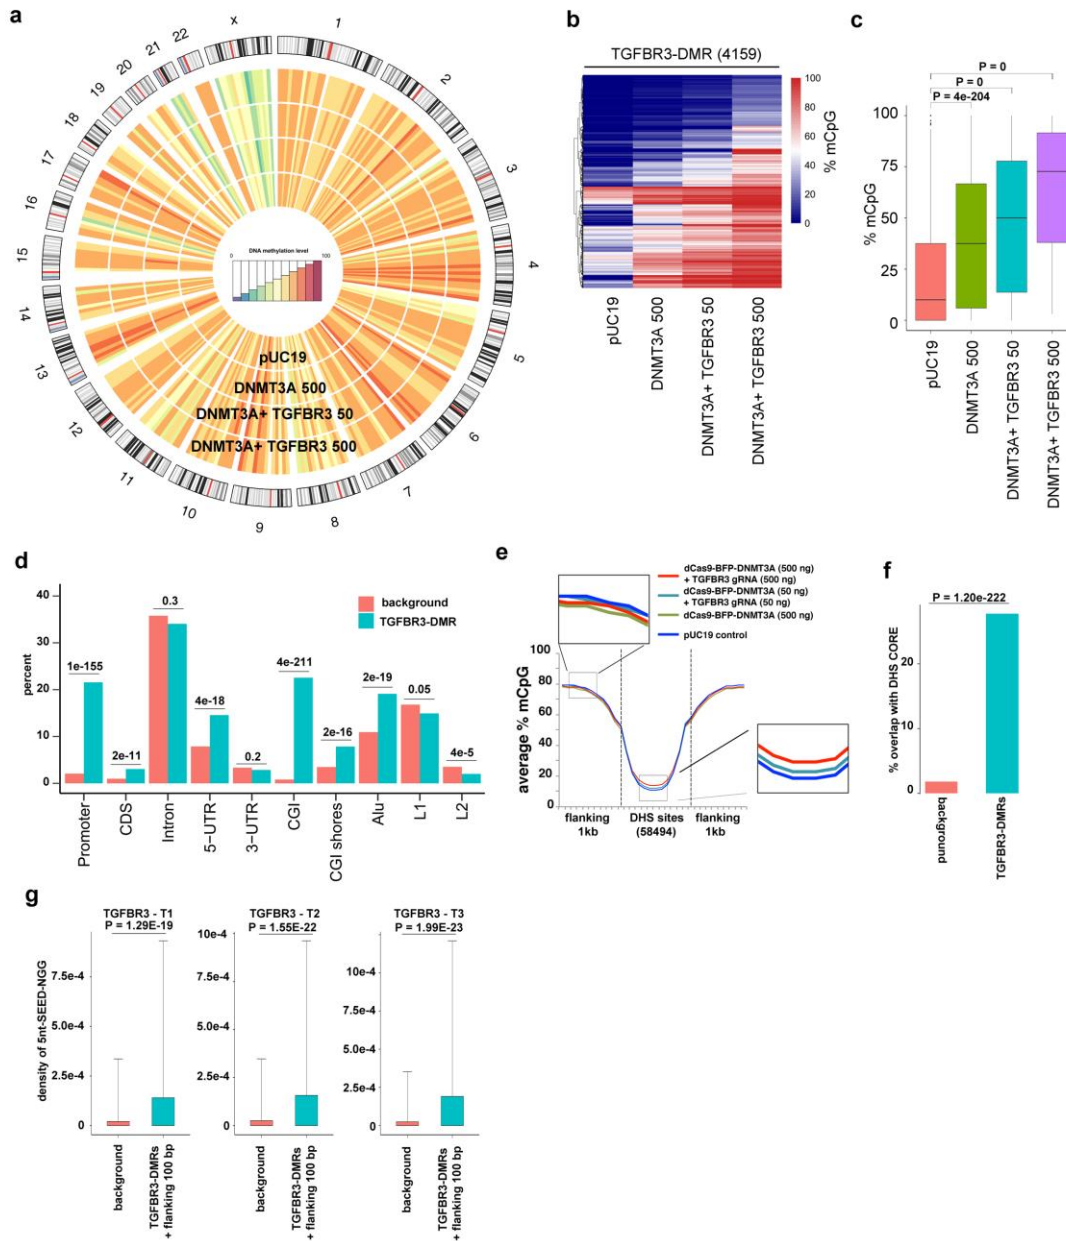

1198

1199

**Supplementary Fig. 12 Effect of overexpressing dCas9-BFP-DNMT3A and *TGFBR3* gRNAs on global DNA methylation**

1200

1201

1202

1203

1204

(a) Circular plot of average methylation of 289 10Mb-genomic windows in cells transfected with either pUC19, 500 ng of dCas9-BFP-DNMT3A (DNMT3A 500), 50 ng each of dCas9-BFP-DNMT3A and *TGFBR3* gRNAs (DNMT3A + *TGFBR3* 50), or 500 ng each of dCas9-BFP-DNMT3A and *TGFBR3* gRNAs (DNMT3A + *TGFBR3* 500). (b) Heatmap clustering of the

1  
2  
3  
4 1205  
5 1206  
6 1207  
7 1208  
8 1209  
9 1210  
10 1211  
11 1212  
12 1213  
13 1214  
14 1215  
15 1216  
16 1217

hypermethylated DMRs resulted from expressing high amount of 500 ng each of dCas9-BFP-DNMT3A and *TGFBR3* gRNAs (DNMT3A + *TGFBR3* 500) (denoted *TGFBR3*-DMRs, n = 4159). (c) Box plot of *TGFBR3*-DMRs methylation levels. P values (t-test) are given above the plot. (d) Bar chart illustrating the percentage of the identified *TGFBR3*-DMRs that fall into the different types of genomic regions indicated. Background represents the percentage of a random sample of the same number of similar sized genomic windows that fall into the categories indicated. Values above bars are P values between background and *TGFBR3*-DMRs, Fisher's exact test. (e) Metaplot of average CpG methylation levels in 58,494 DNase I hypersensitive sites (DHS) and 1 kb upstream and downstream flanking regions. (f) Bar chart of % *TGFBR3*-DMRs falling into DHS core regions. (g) Density of 5nt-SEED-NGG for *TGFBR3* gRNAs (T1 to T3) in background genomic windows and *TGFBR3A*-DMRs + flanking 100 bp. Values represent median density with one standard deviation. P values (t-test) are given above the bar charts.

Fig. S13

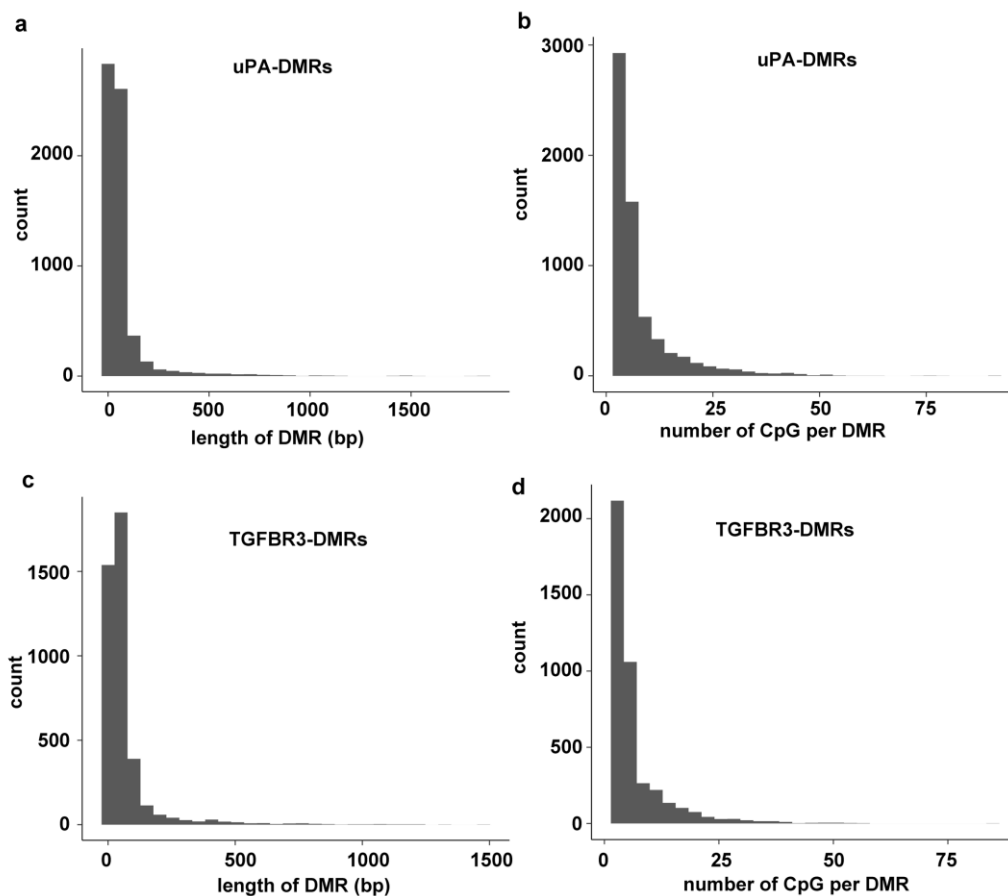

1218  
1219

Supplementary Fig. 13 Histogram charts of the distribution of DMR length (bp), and



1220 number of CpGs per DMR. (a-b) Distribution of DMR length and CpG number for the uPA-  
 1221 DMRs. (c-d) Distribution of DMR length and CpG number for the TGFBR3-DMRs  
 1222

Fig. S14

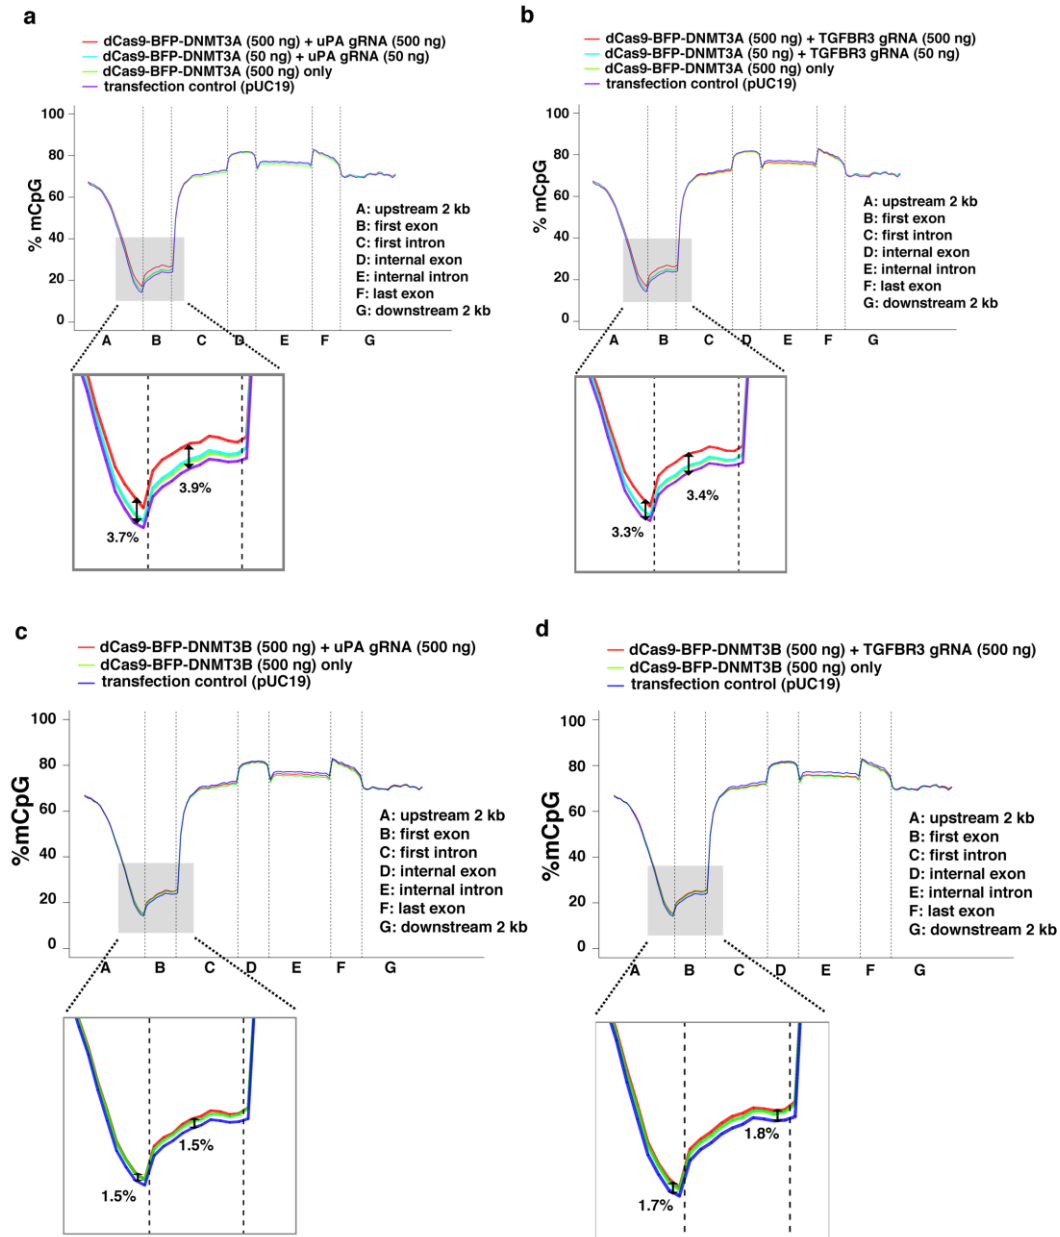

1223 **Supplementary Fig. 14 Average methylation levels of seven genomic regions in all**  
 1224 **annotated genes (hg19).** (a-d) Each line indicates the genome-wide average methylation levels  
 1225 across seven genomic regions: upstream 2kb of the transcription start site, first exon,  
 1226 internal exons, internal introns, last exon, and downstream 2kb of the last exon.  
 1227

1228

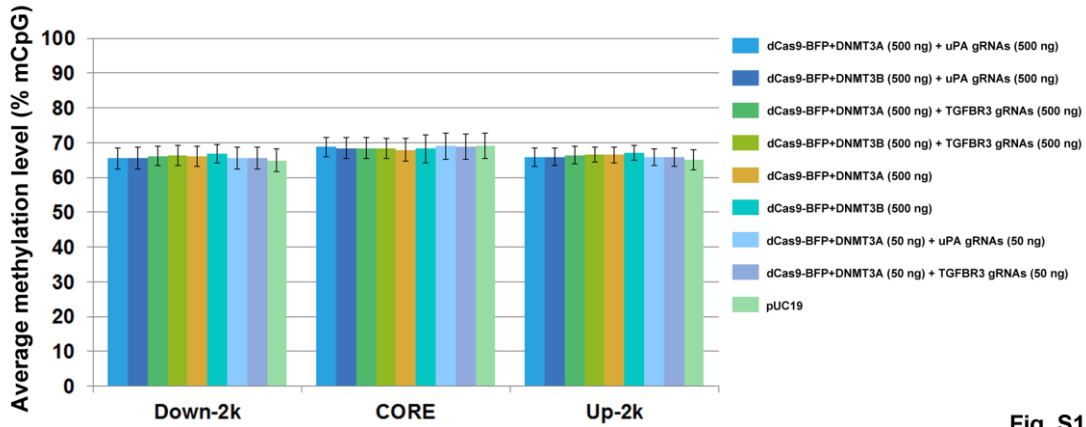

Fig. S15

**Supplementary Fig. 15 The average methylation level in ChIP-peaks and flanking regions.**

Bar chart presents the average methylation level of all dCas9-BFP-DNMT3A and uPA gRNAoff-target binding sites (n = 7754) found by ChIP-seq, as well as the 2kb upstream and downstream region.

**Supplementary Table 1 List of uPA-DMRs**

**Supplementary Table 2 List of TGFBR3-DMRs**

**Supplementary Table 3 List of ChIP peaks**

**Supplementary Table 4** List of plasmids deposited to Addgene, qPCR primers, CRISPRme gRNA sequences, bisulfite PCR primers, bisulfite pyrosequencing primers, and DNA regions analyzed for methylation.

Fig. 1

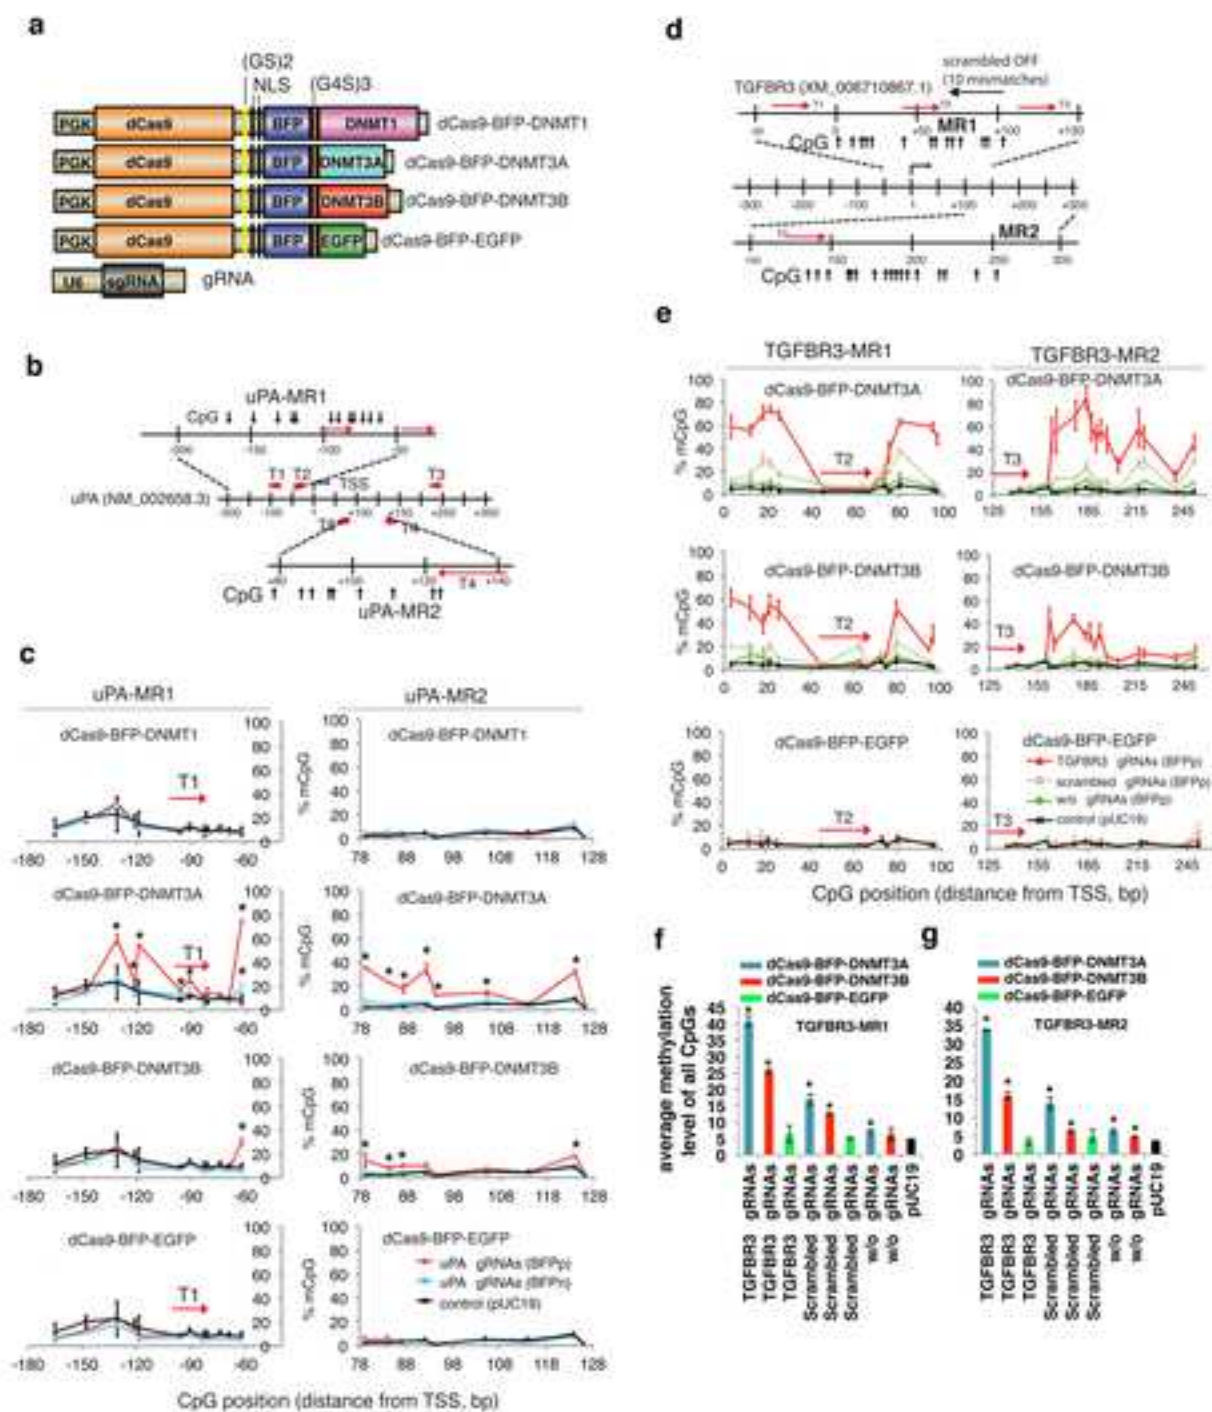

Fig 2

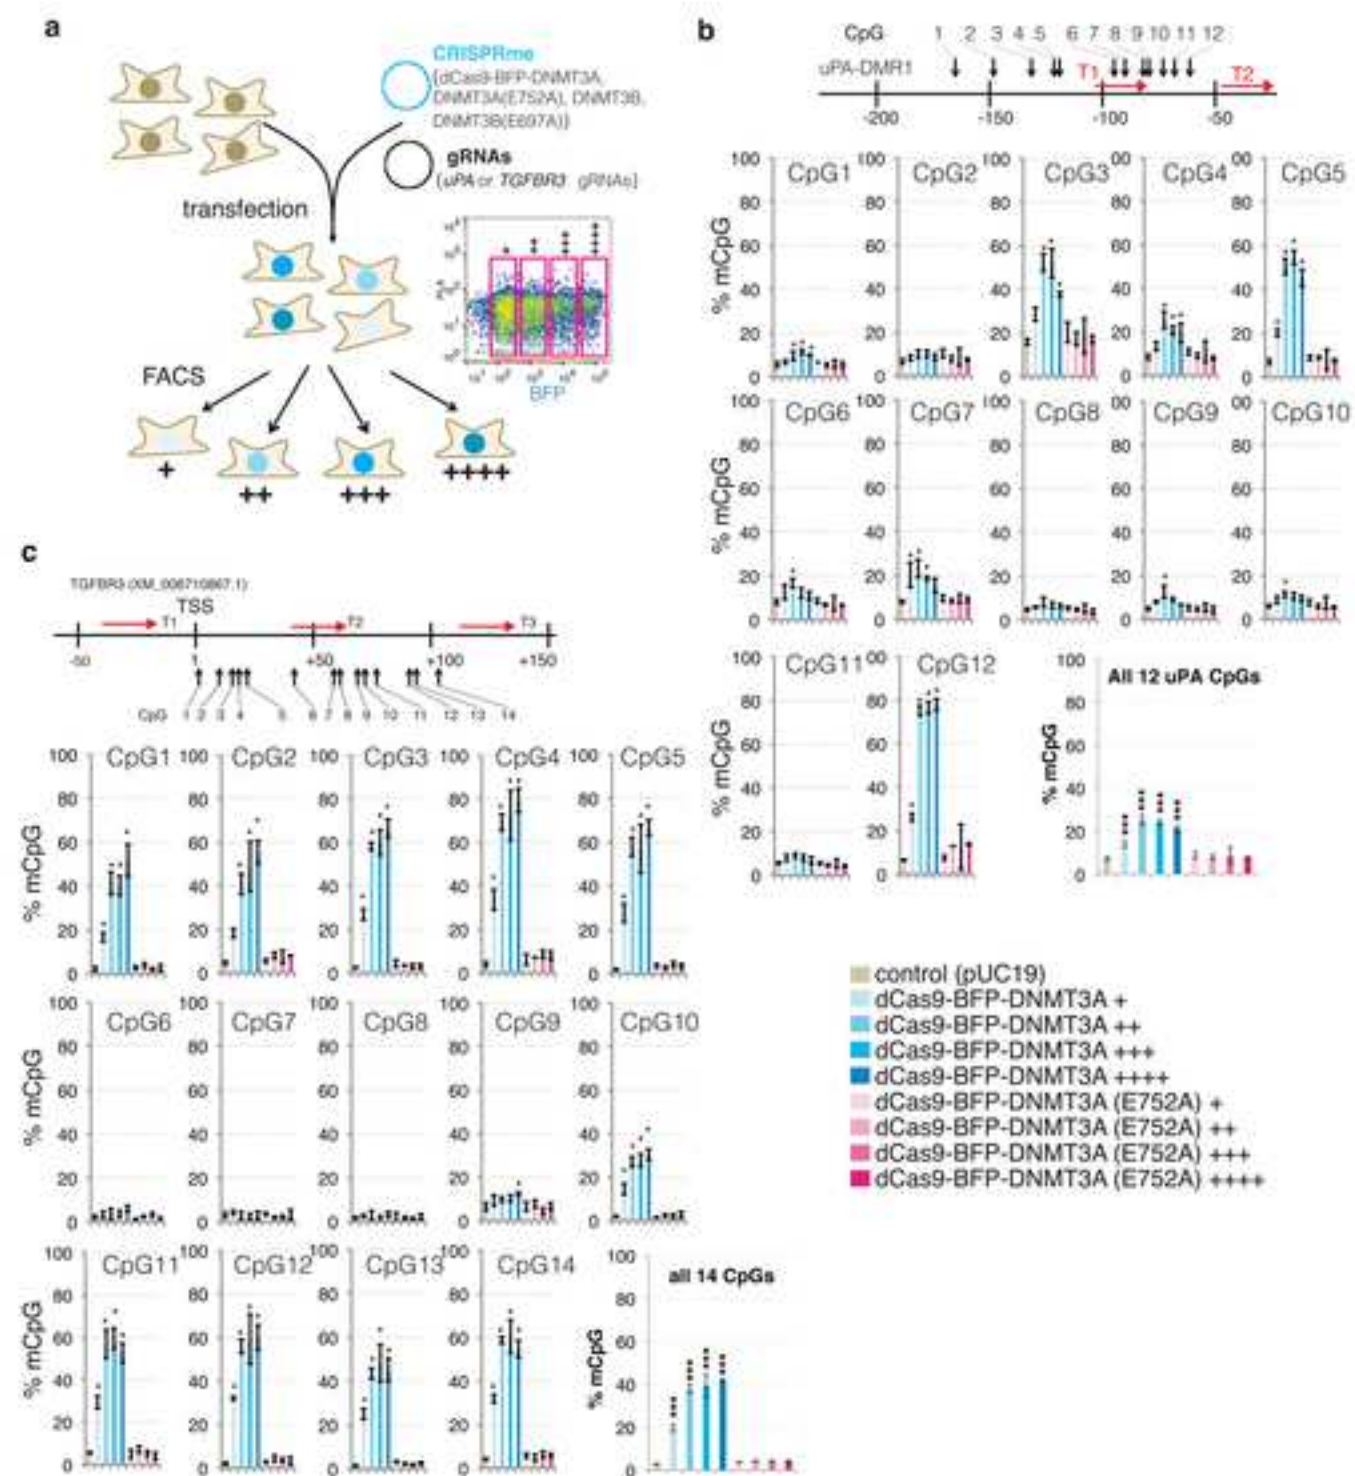

Fig. 3

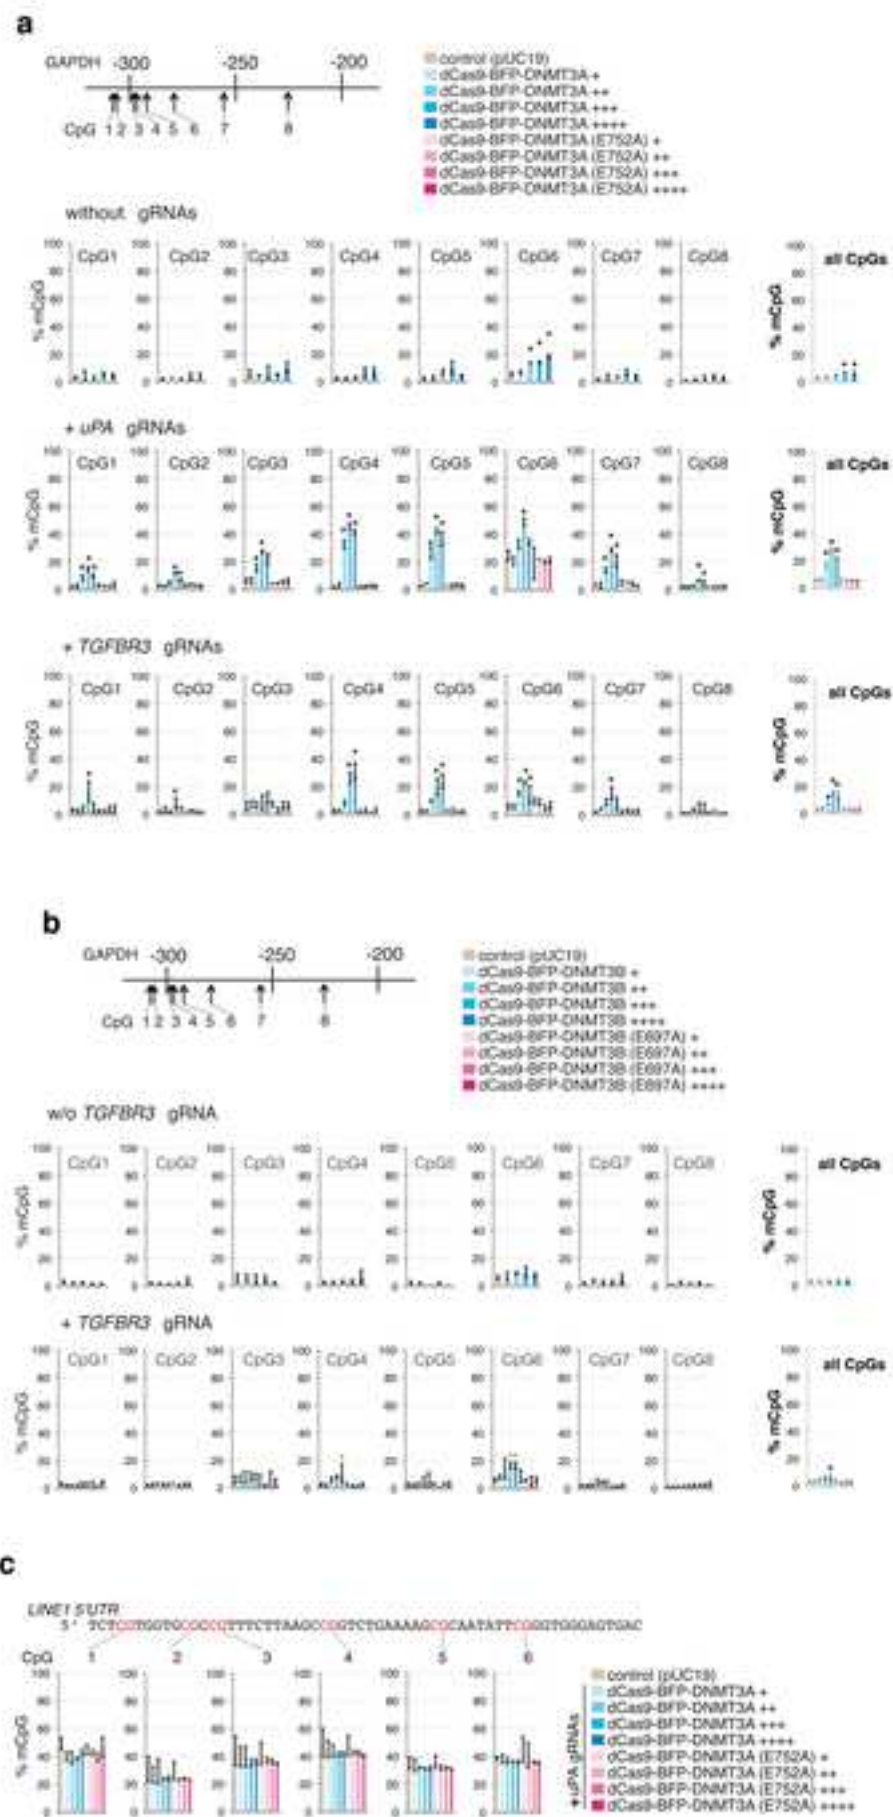

Fig 4

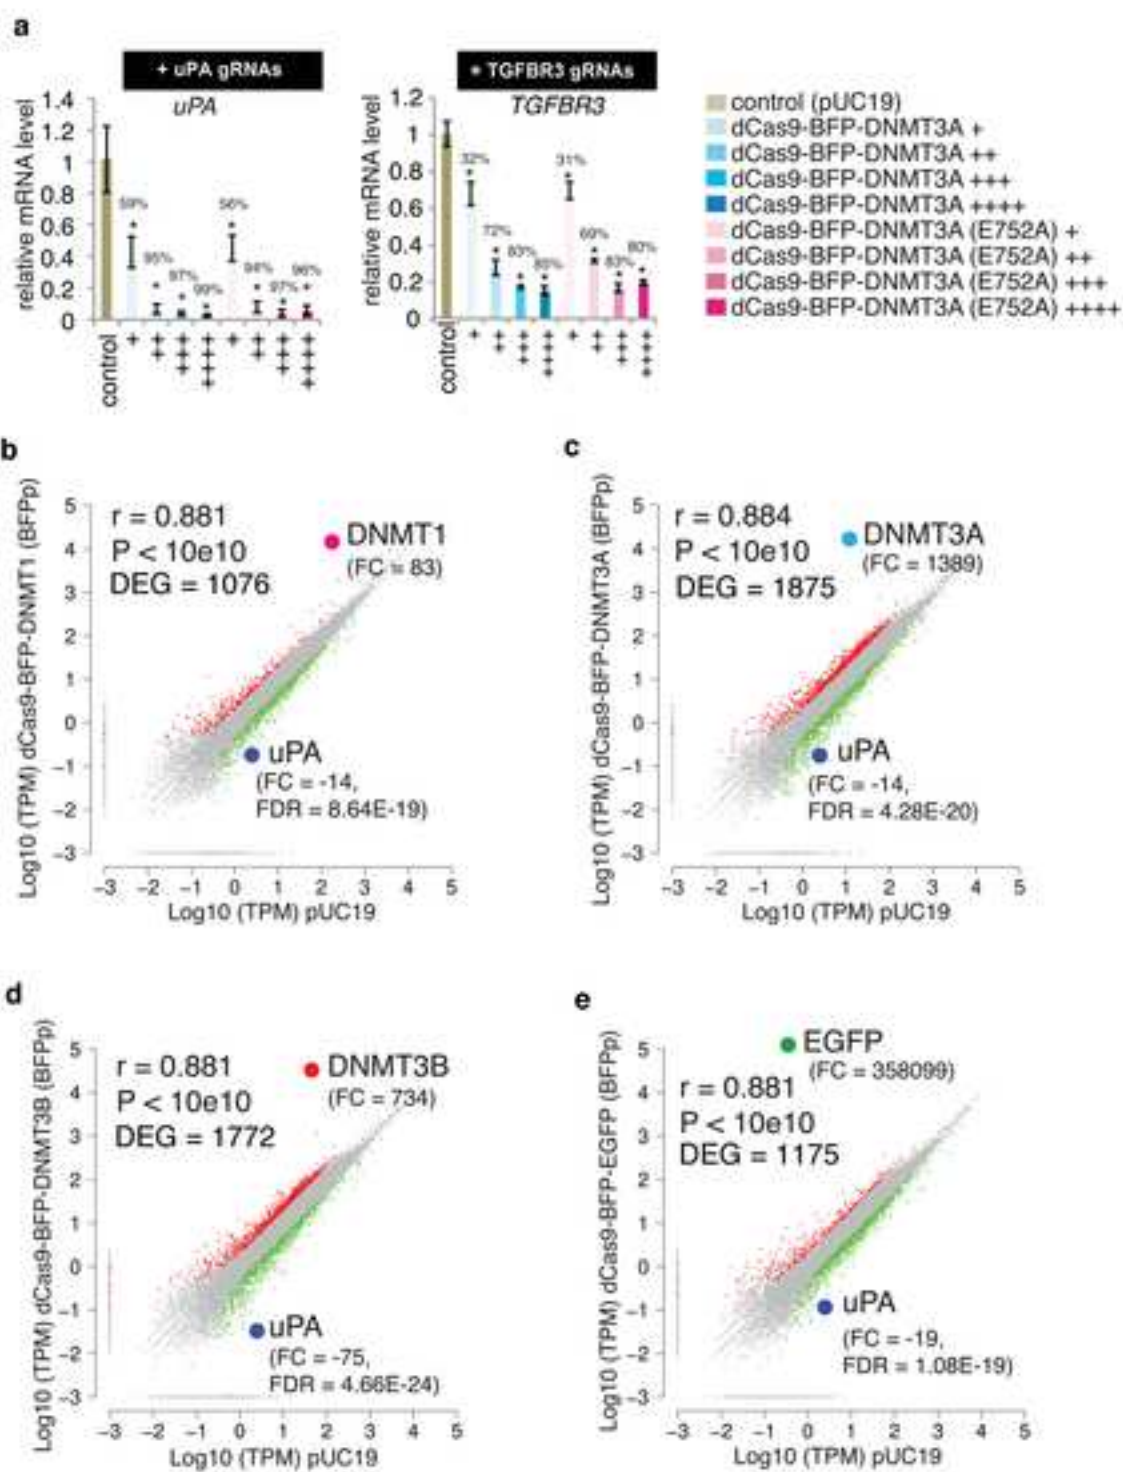

Fig 5

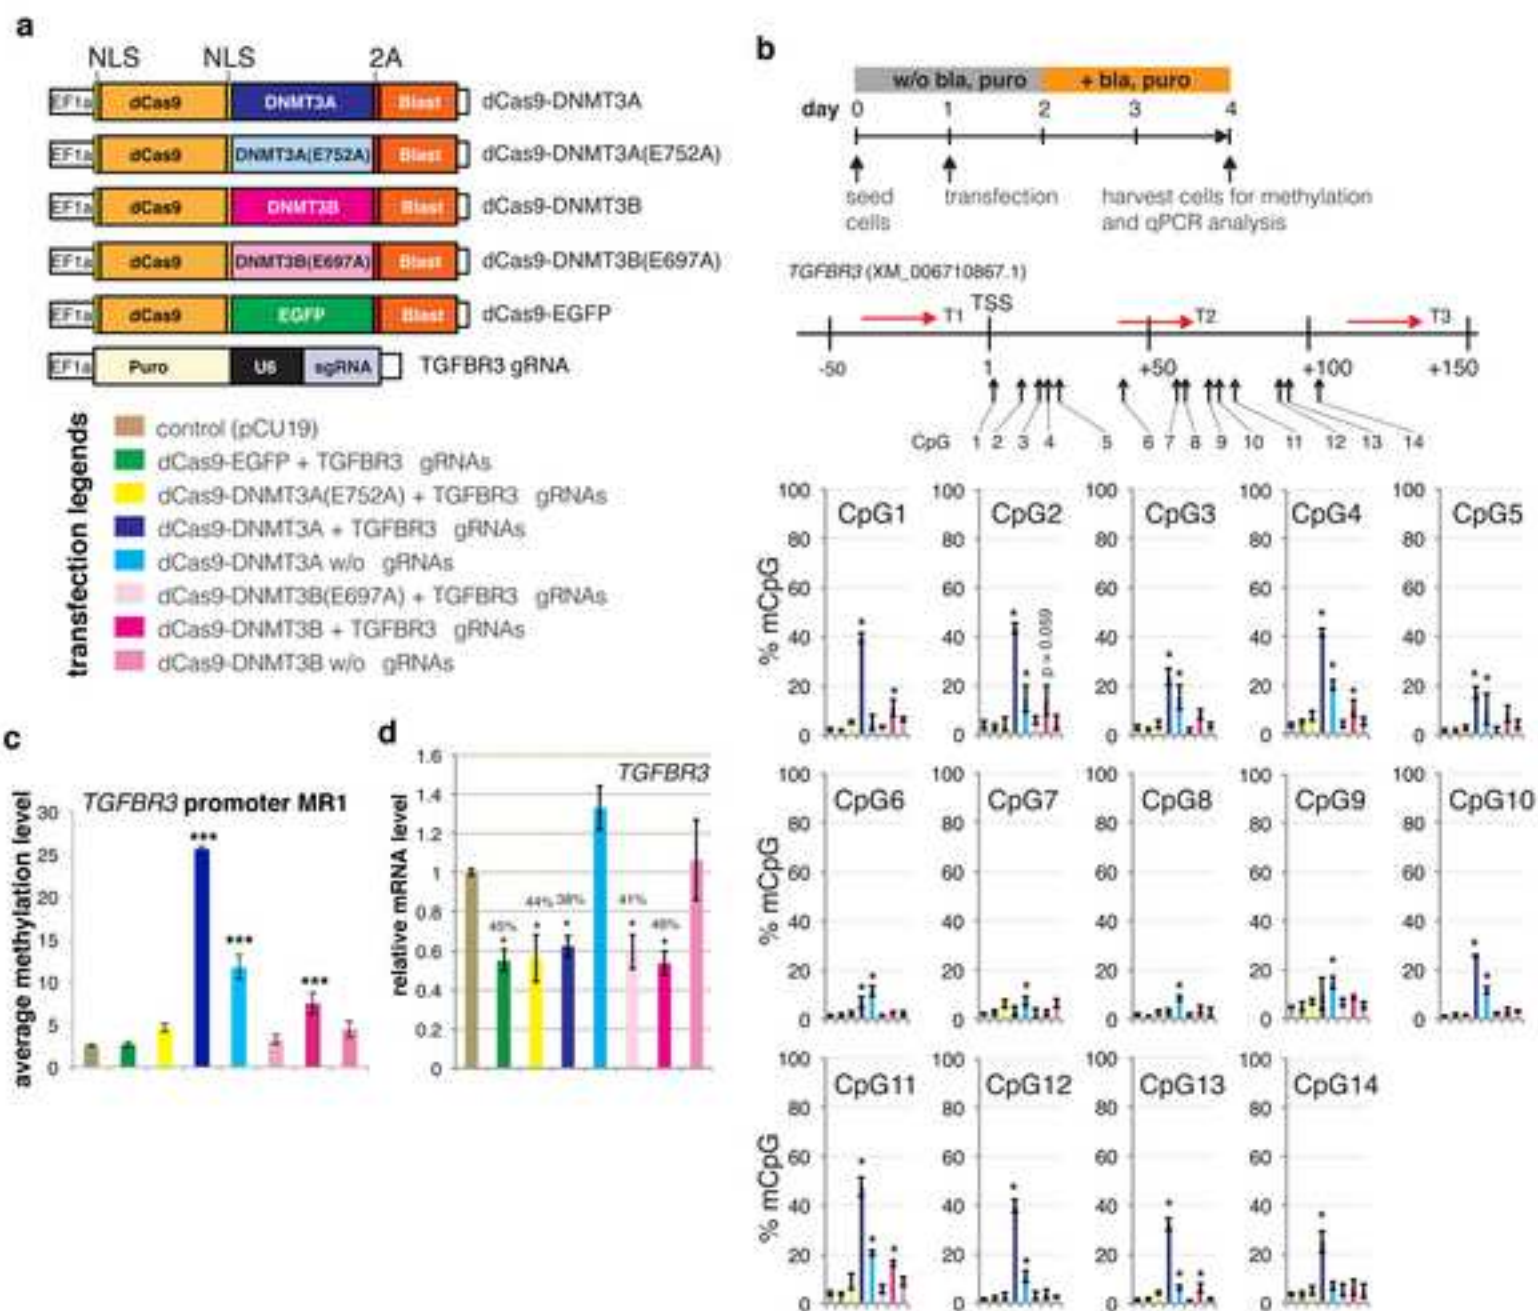

Fig 6

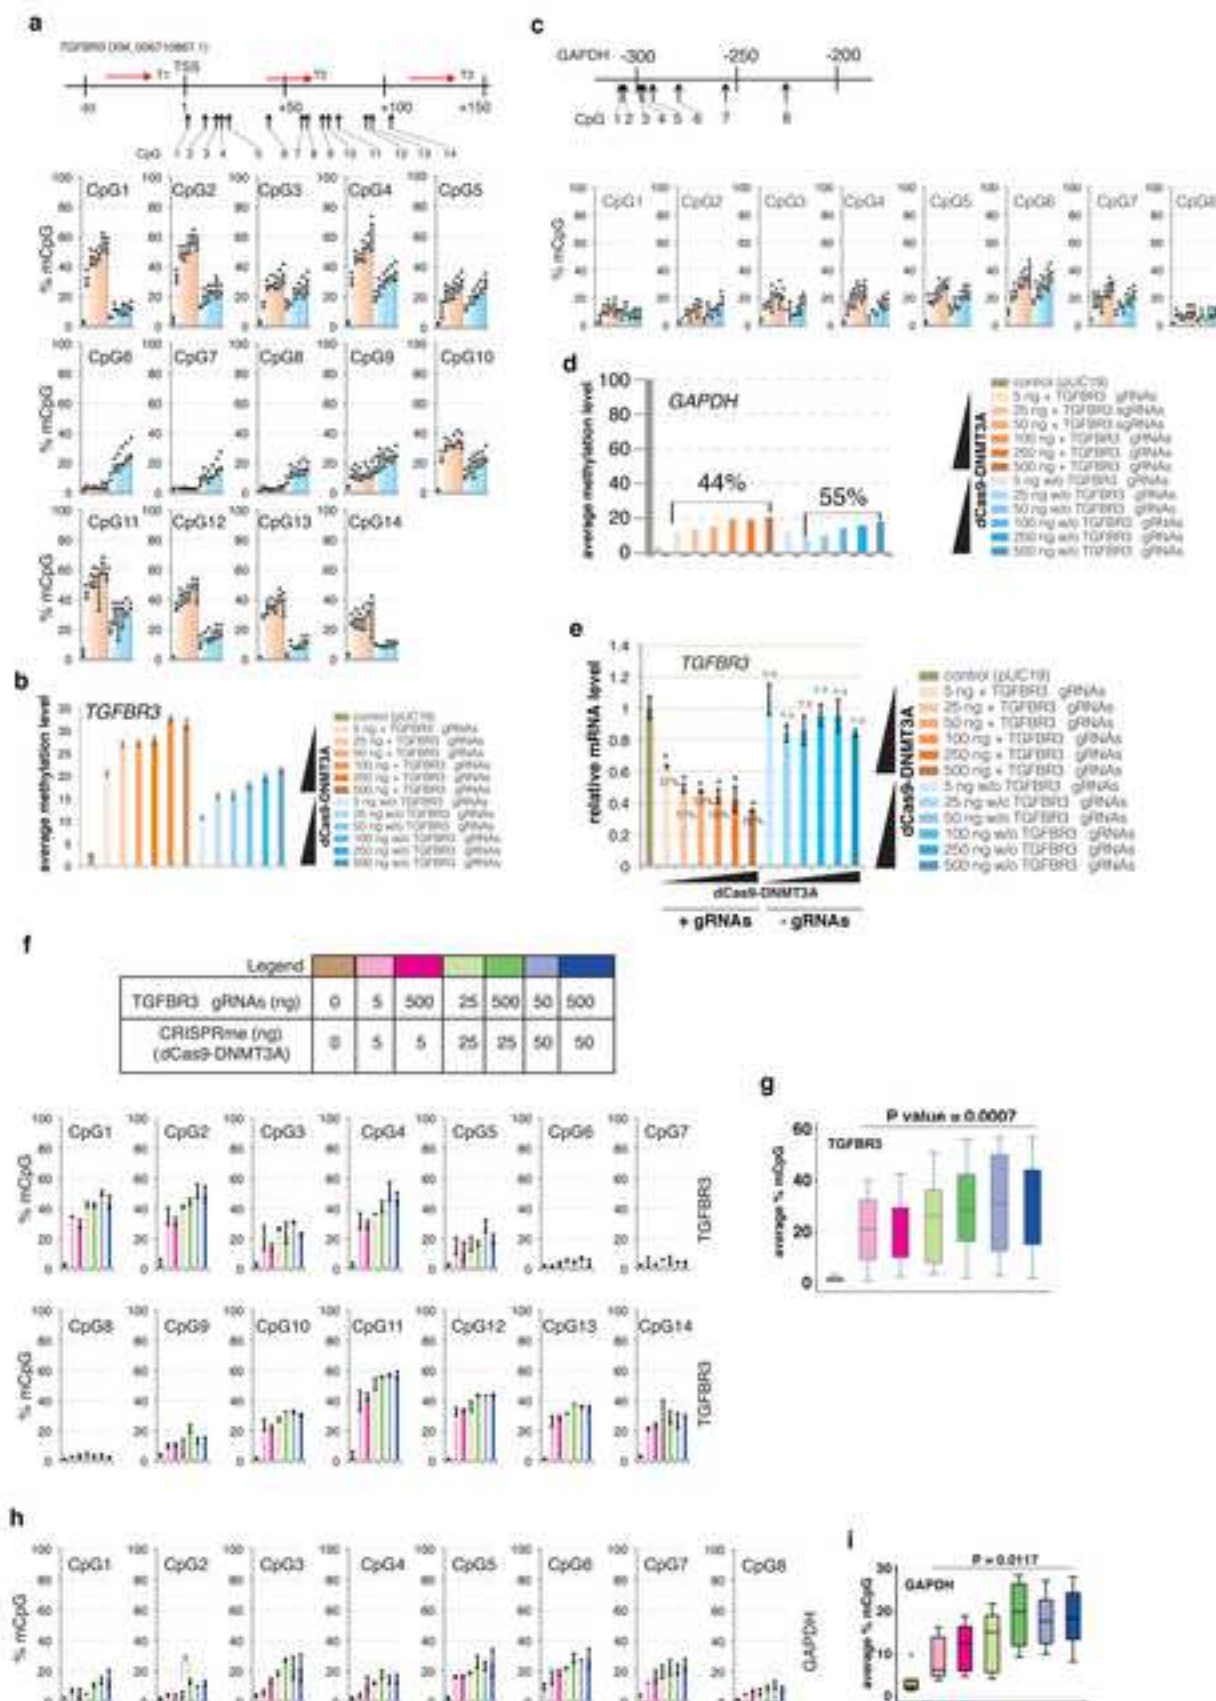



Fig. 7

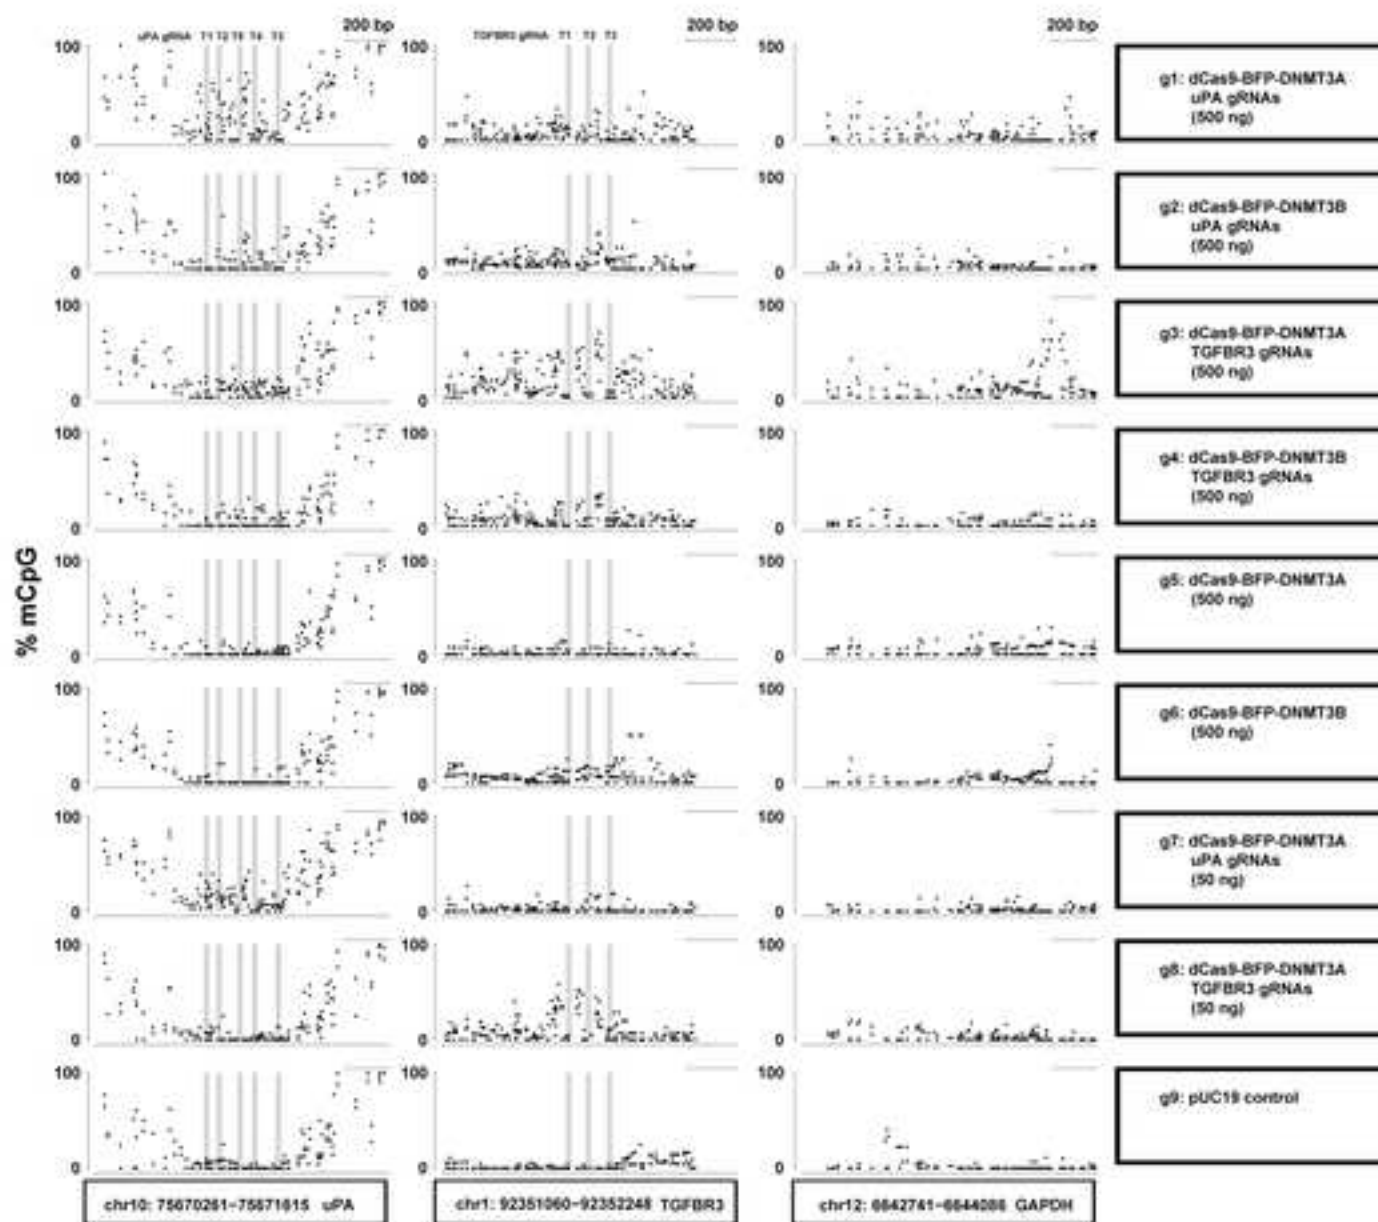

Fig. 8

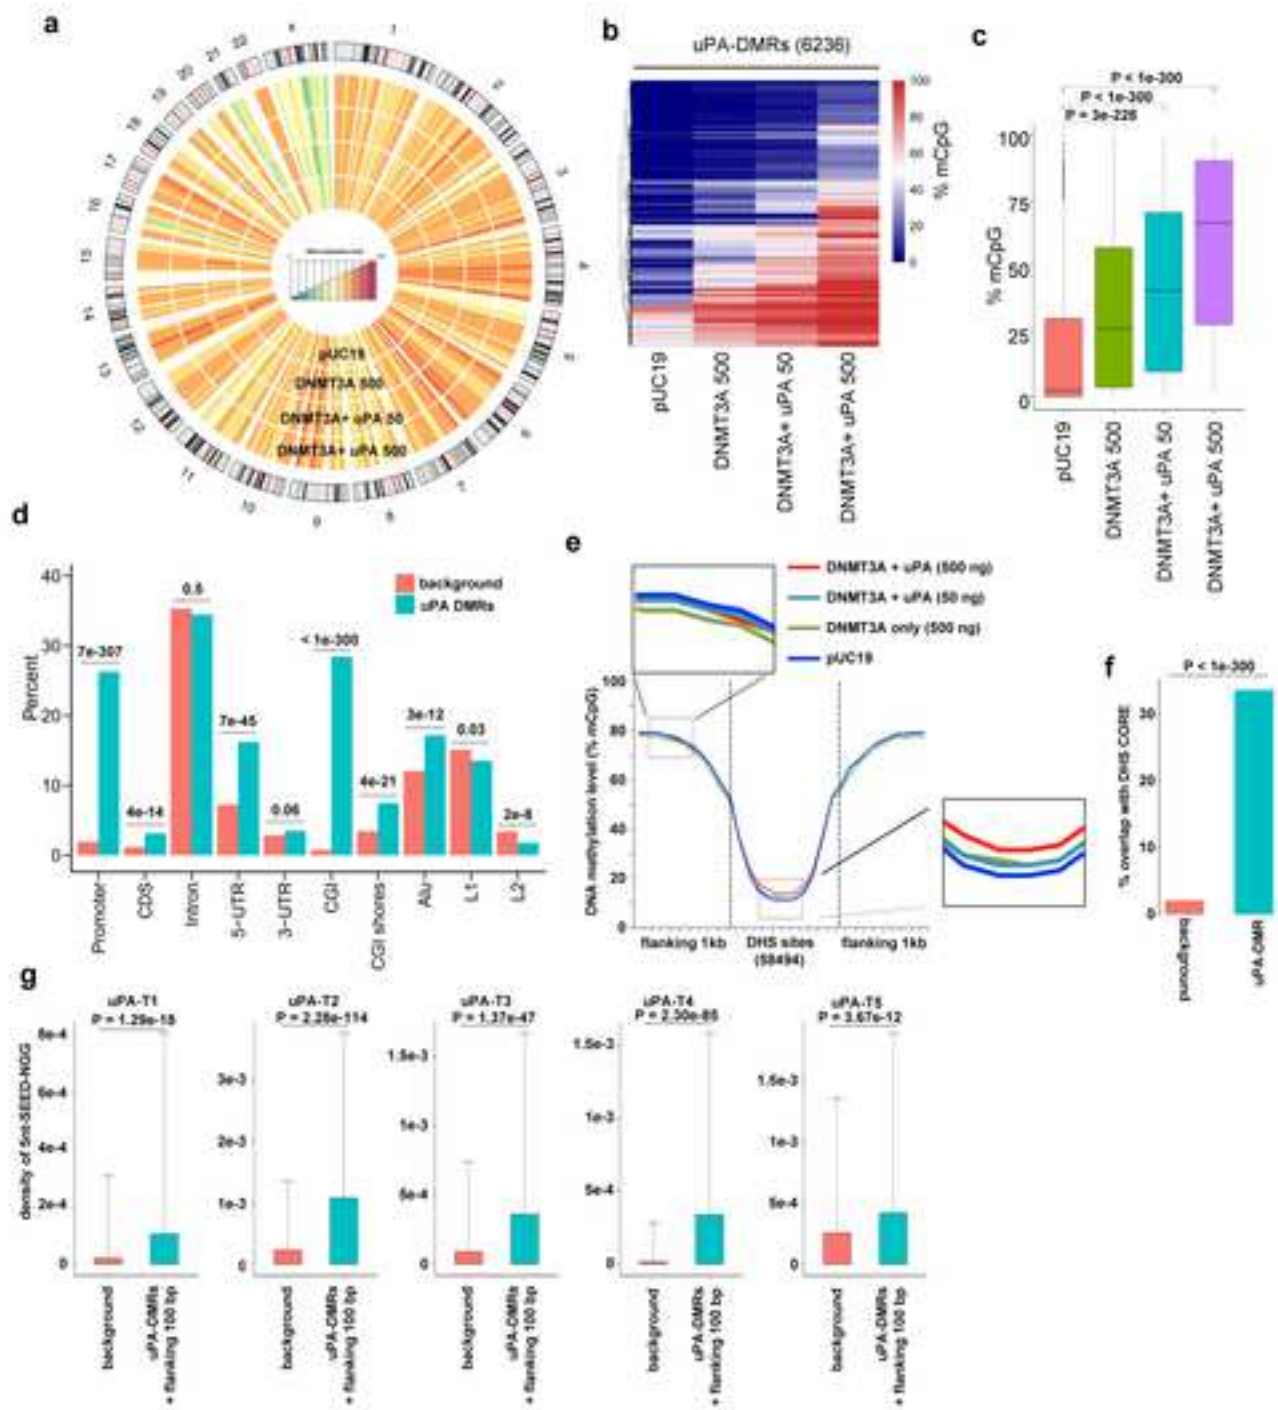

Fig. 9

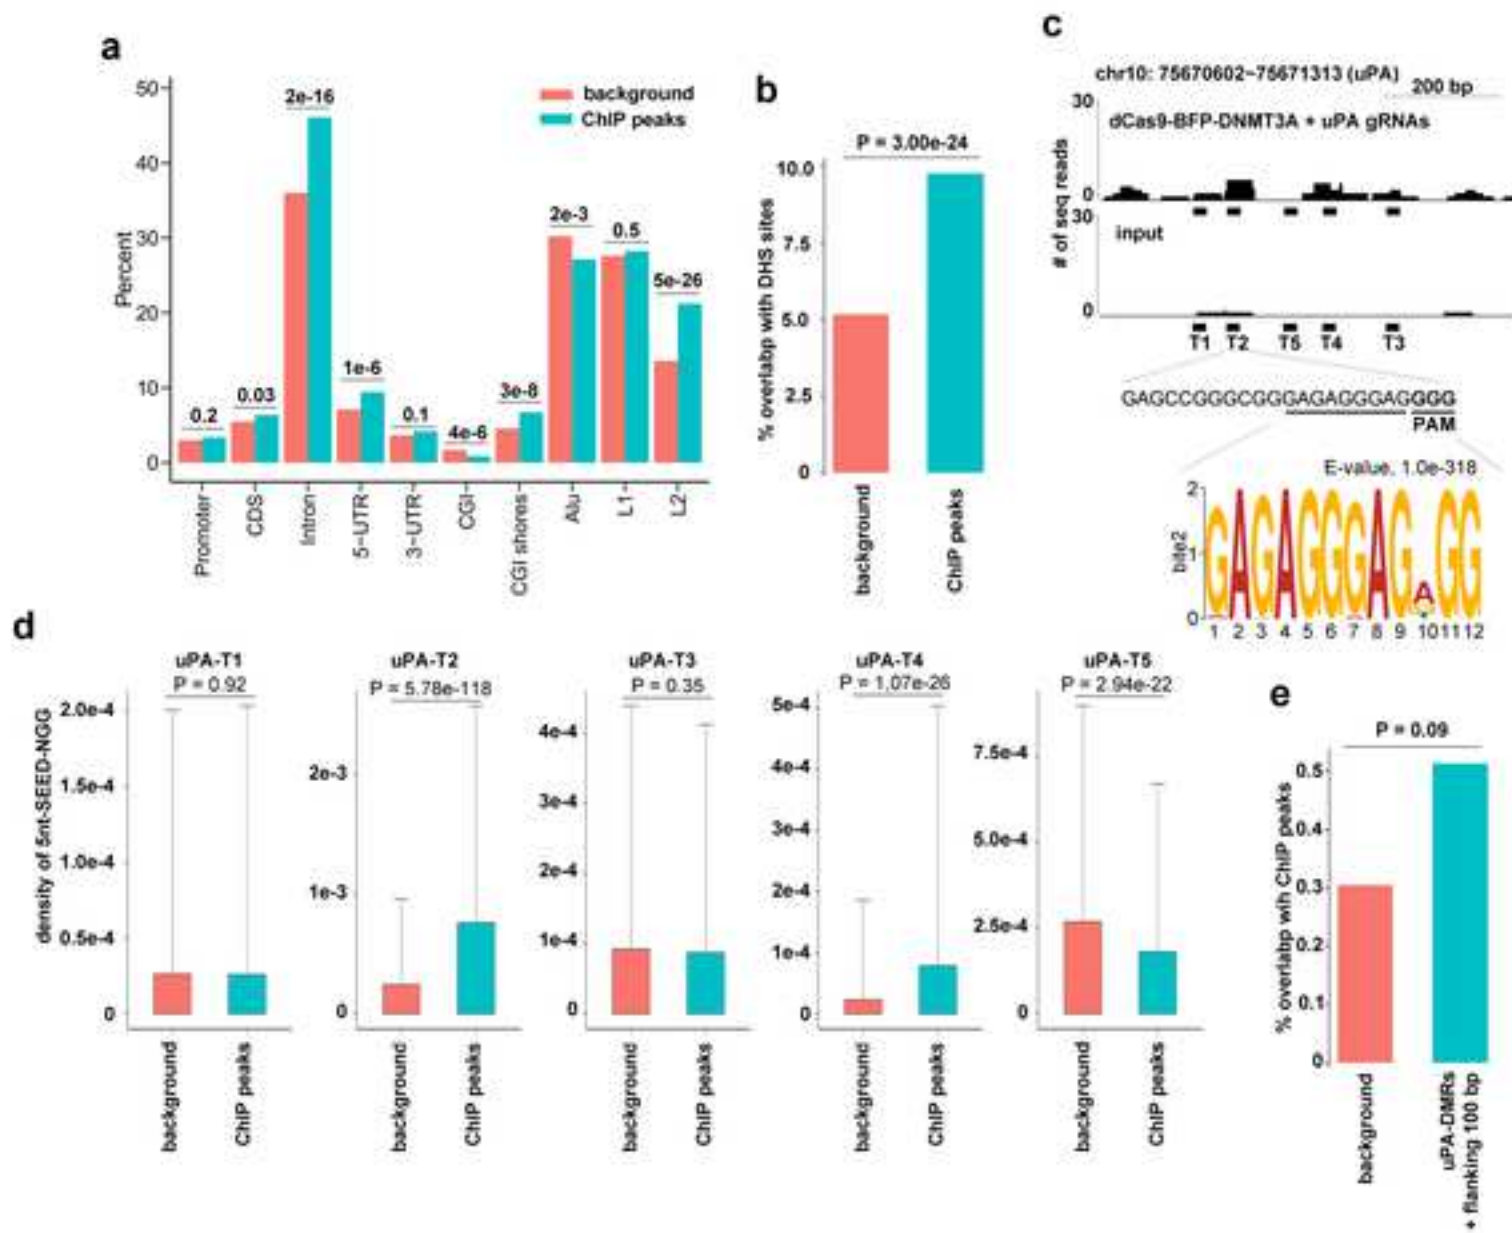



Click here to access/download  
**Supplementary Material**  
Fig.S1 dpi300.tif



Click here to access/download  
**Supplementary Material**  
Fig.S2 dpi300.tif





Click here to access/download  
**Supplementary Material**  
Fig.S3 dpi300.tif





Click here to access/download  
**Supplementary Material**  
Fig.S4 dpi300.tif



Click here to access/download  
**Supplementary Material**  
Fig.S5 dpi300.tif







Click here to access/download  
**Supplementary Material**  
Fig.S6 dpi300.tif





Click here to access/download  
**Supplementary Material**  
Fig.S7 dpi300.tif





Click here to access/download  
**Supplementary Material**  
Fig.S8 dpi300.tif





Click here to access/download  
**Supplementary Material**  
Fig.S9 dpi300.tif



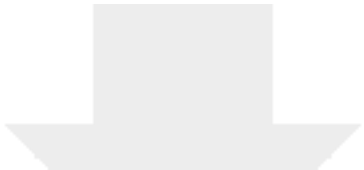

Click here to access/download  
**Supplementary Material**  
Fig.S10 dpi300.tif



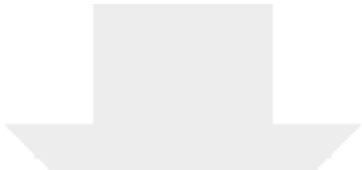

Click here to access/download  
**Supplementary Material**  
Fig.S11 dpi300.tif



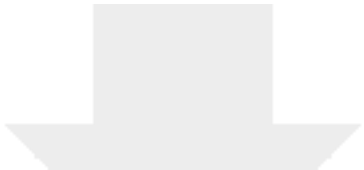

Click here to access/download  
**Supplementary Material**  
Fig.S12 dpi300.tif



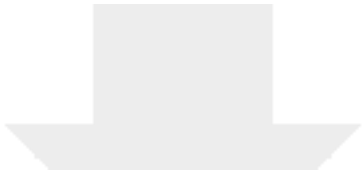

Click here to access/download  
**Supplementary Material**  
Fig.S13 dpi300.tif





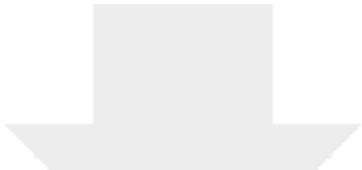

Click here to access/download  
**Supplementary Material**  
Fig.S14 dpi300.tif



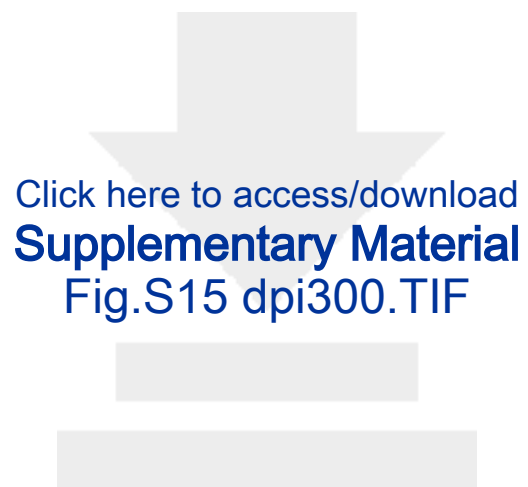

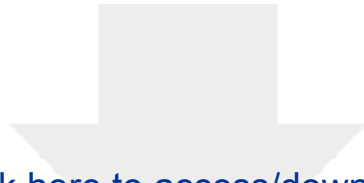

[Click here to access/download](#)

**Supplementary Material**

Supplementary Table 1. uPA-DMRs.xlsx

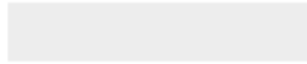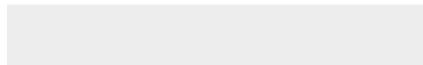

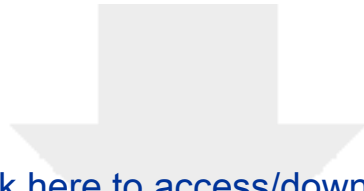

[Click here to access/download](#)

**Supplementary Material**

Supplementary Table 2. TGFBR3-DMRs.xlsx



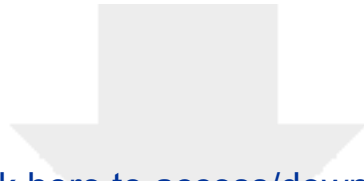

[Click here to access/download](#)

**Supplementary Material**

Supplementary Table 3 CHIP peaks.xlsx

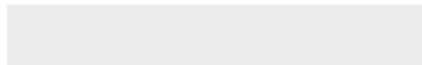

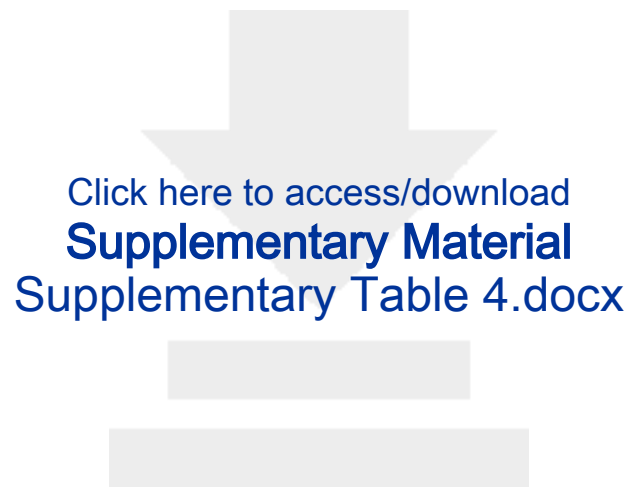

Click here to access/download  
**Supplementary Material**  
Supplementary Table 4.docx
