# Supplementary material for: Genome-wide determination of on-target and off-target characteristics for RNA-guided DNA methylation by dCas9 methyltransferases
Source: Oxford University Press journal article supplement (doi:10.1093/gigascience/giy011), 2018-02-19
Supplement: giy011_giga-d-17-00040_revision_1.pdf [file giy011_giga-d-17-00040_revision_1.pdf]

## Genome wide determination of on-target and off-target characteristics for RNA-guided DNA Methylation by dCas9 methyltransferases --Manuscript Draft--

|                                                                   |                                                                                                                                                                                                                                                                                                                                                                                                                                                                                                                                                                                                                                                                                                                                                                                                                                                                                                                                                                                                                                                                                                                                                                                                                                                                                                                                                                                                                                                                                                                                                                                                                                                                                                                                                                                                                                                                                                                                                                                                                                                                                                                                                                                                                                                                                                                                                                                     |  |                                                                  |                   |                                                                   |                   |                                     |                   |                                 |                   |                                  |                   |                                 |             |                        |                           |                |                           |
|-------------------------------------------------------------------|-------------------------------------------------------------------------------------------------------------------------------------------------------------------------------------------------------------------------------------------------------------------------------------------------------------------------------------------------------------------------------------------------------------------------------------------------------------------------------------------------------------------------------------------------------------------------------------------------------------------------------------------------------------------------------------------------------------------------------------------------------------------------------------------------------------------------------------------------------------------------------------------------------------------------------------------------------------------------------------------------------------------------------------------------------------------------------------------------------------------------------------------------------------------------------------------------------------------------------------------------------------------------------------------------------------------------------------------------------------------------------------------------------------------------------------------------------------------------------------------------------------------------------------------------------------------------------------------------------------------------------------------------------------------------------------------------------------------------------------------------------------------------------------------------------------------------------------------------------------------------------------------------------------------------------------------------------------------------------------------------------------------------------------------------------------------------------------------------------------------------------------------------------------------------------------------------------------------------------------------------------------------------------------------------------------------------------------------------------------------------------------|--|------------------------------------------------------------------|-------------------|-------------------------------------------------------------------|-------------------|-------------------------------------|-------------------|---------------------------------|-------------------|----------------------------------|-------------------|---------------------------------|-------------|------------------------|---------------------------|----------------|---------------------------|
| <b>Manuscript Number:</b>                                         | GIGA-D-17-00040R1                                                                                                                                                                                                                                                                                                                                                                                                                                                                                                                                                                                                                                                                                                                                                                                                                                                                                                                                                                                                                                                                                                                                                                                                                                                                                                                                                                                                                                                                                                                                                                                                                                                                                                                                                                                                                                                                                                                                                                                                                                                                                                                                                                                                                                                                                                                                                                   |  |                                                                  |                   |                                                                   |                   |                                     |                   |                                 |                   |                                  |                   |                                 |             |                        |                           |                |                           |
| <b>Full Title:</b>                                                | Genome wide determination of on-target and off-target characteristics for RNA-guided DNA Methylation by dCas9 methyltransferases                                                                                                                                                                                                                                                                                                                                                                                                                                                                                                                                                                                                                                                                                                                                                                                                                                                                                                                                                                                                                                                                                                                                                                                                                                                                                                                                                                                                                                                                                                                                                                                                                                                                                                                                                                                                                                                                                                                                                                                                                                                                                                                                                                                                                                                    |  |                                                                  |                   |                                                                   |                   |                                     |                   |                                 |                   |                                  |                   |                                 |             |                        |                           |                |                           |
| <b>Article Type:</b>                                              | Research                                                                                                                                                                                                                                                                                                                                                                                                                                                                                                                                                                                                                                                                                                                                                                                                                                                                                                                                                                                                                                                                                                                                                                                                                                                                                                                                                                                                                                                                                                                                                                                                                                                                                                                                                                                                                                                                                                                                                                                                                                                                                                                                                                                                                                                                                                                                                                            |  |                                                                  |                   |                                                                   |                   |                                     |                   |                                 |                   |                                  |                   |                                 |             |                        |                           |                |                           |
| <b>Funding Information:</b>                                       | <table border="1"> <tr> <td>Teknologi og Produktion, Det Frie Forskningsråd (DFF-1337-00128)</td> <td>Prof. Yonglun Luo</td> </tr> <tr> <td>Teknologi og Produktion, Det Frie Forskningsråd (DFF-1335-00763A)</td> <td>Prof. Yonglun Luo</td> </tr> <tr> <td>Innovation Fund Denmark (BrainStem)</td> <td>Prof. Yonglun Luo</td> </tr> <tr> <td>Lundbeckfonden (R173-2014-1105)</td> <td>Prof. Yonglun Luo</td> </tr> <tr> <td>Lundbeckfonden (R151-2013-14439)</td> <td>Prof. Lars Bolund</td> </tr> <tr> <td>Lundbeckfonden (R219-2016-1375)</td> <td>Dr. Lin Lin</td> </tr> <tr> <td>Toyota Foundation (JP)</td> <td>Prof. Anders Lade Nielsen</td> </tr> <tr> <td>Lundbeckfonden</td> <td>Prof. Anders Lade Nielsen</td> </tr> </table>                                                                                                                                                                                                                                                                                                                                                                                                                                                                                                                                                                                                                                                                                                                                                                                                                                                                                                                                                                                                                                                                                                                                                                                                                                                                                                                                                                                                                                                                                                                                                                                                                                         |  | Teknologi og Produktion, Det Frie Forskningsråd (DFF-1337-00128) | Prof. Yonglun Luo | Teknologi og Produktion, Det Frie Forskningsråd (DFF-1335-00763A) | Prof. Yonglun Luo | Innovation Fund Denmark (BrainStem) | Prof. Yonglun Luo | Lundbeckfonden (R173-2014-1105) | Prof. Yonglun Luo | Lundbeckfonden (R151-2013-14439) | Prof. Lars Bolund | Lundbeckfonden (R219-2016-1375) | Dr. Lin Lin | Toyota Foundation (JP) | Prof. Anders Lade Nielsen | Lundbeckfonden | Prof. Anders Lade Nielsen |
| Teknologi og Produktion, Det Frie Forskningsråd (DFF-1337-00128)  | Prof. Yonglun Luo                                                                                                                                                                                                                                                                                                                                                                                                                                                                                                                                                                                                                                                                                                                                                                                                                                                                                                                                                                                                                                                                                                                                                                                                                                                                                                                                                                                                                                                                                                                                                                                                                                                                                                                                                                                                                                                                                                                                                                                                                                                                                                                                                                                                                                                                                                                                                                   |  |                                                                  |                   |                                                                   |                   |                                     |                   |                                 |                   |                                  |                   |                                 |             |                        |                           |                |                           |
| Teknologi og Produktion, Det Frie Forskningsråd (DFF-1335-00763A) | Prof. Yonglun Luo                                                                                                                                                                                                                                                                                                                                                                                                                                                                                                                                                                                                                                                                                                                                                                                                                                                                                                                                                                                                                                                                                                                                                                                                                                                                                                                                                                                                                                                                                                                                                                                                                                                                                                                                                                                                                                                                                                                                                                                                                                                                                                                                                                                                                                                                                                                                                                   |  |                                                                  |                   |                                                                   |                   |                                     |                   |                                 |                   |                                  |                   |                                 |             |                        |                           |                |                           |
| Innovation Fund Denmark (BrainStem)                               | Prof. Yonglun Luo                                                                                                                                                                                                                                                                                                                                                                                                                                                                                                                                                                                                                                                                                                                                                                                                                                                                                                                                                                                                                                                                                                                                                                                                                                                                                                                                                                                                                                                                                                                                                                                                                                                                                                                                                                                                                                                                                                                                                                                                                                                                                                                                                                                                                                                                                                                                                                   |  |                                                                  |                   |                                                                   |                   |                                     |                   |                                 |                   |                                  |                   |                                 |             |                        |                           |                |                           |
| Lundbeckfonden (R173-2014-1105)                                   | Prof. Yonglun Luo                                                                                                                                                                                                                                                                                                                                                                                                                                                                                                                                                                                                                                                                                                                                                                                                                                                                                                                                                                                                                                                                                                                                                                                                                                                                                                                                                                                                                                                                                                                                                                                                                                                                                                                                                                                                                                                                                                                                                                                                                                                                                                                                                                                                                                                                                                                                                                   |  |                                                                  |                   |                                                                   |                   |                                     |                   |                                 |                   |                                  |                   |                                 |             |                        |                           |                |                           |
| Lundbeckfonden (R151-2013-14439)                                  | Prof. Lars Bolund                                                                                                                                                                                                                                                                                                                                                                                                                                                                                                                                                                                                                                                                                                                                                                                                                                                                                                                                                                                                                                                                                                                                                                                                                                                                                                                                                                                                                                                                                                                                                                                                                                                                                                                                                                                                                                                                                                                                                                                                                                                                                                                                                                                                                                                                                                                                                                   |  |                                                                  |                   |                                                                   |                   |                                     |                   |                                 |                   |                                  |                   |                                 |             |                        |                           |                |                           |
| Lundbeckfonden (R219-2016-1375)                                   | Dr. Lin Lin                                                                                                                                                                                                                                                                                                                                                                                                                                                                                                                                                                                                                                                                                                                                                                                                                                                                                                                                                                                                                                                                                                                                                                                                                                                                                                                                                                                                                                                                                                                                                                                                                                                                                                                                                                                                                                                                                                                                                                                                                                                                                                                                                                                                                                                                                                                                                                         |  |                                                                  |                   |                                                                   |                   |                                     |                   |                                 |                   |                                  |                   |                                 |             |                        |                           |                |                           |
| Toyota Foundation (JP)                                            | Prof. Anders Lade Nielsen                                                                                                                                                                                                                                                                                                                                                                                                                                                                                                                                                                                                                                                                                                                                                                                                                                                                                                                                                                                                                                                                                                                                                                                                                                                                                                                                                                                                                                                                                                                                                                                                                                                                                                                                                                                                                                                                                                                                                                                                                                                                                                                                                                                                                                                                                                                                                           |  |                                                                  |                   |                                                                   |                   |                                     |                   |                                 |                   |                                  |                   |                                 |             |                        |                           |                |                           |
| Lundbeckfonden                                                    | Prof. Anders Lade Nielsen                                                                                                                                                                                                                                                                                                                                                                                                                                                                                                                                                                                                                                                                                                                                                                                                                                                                                                                                                                                                                                                                                                                                                                                                                                                                                                                                                                                                                                                                                                                                                                                                                                                                                                                                                                                                                                                                                                                                                                                                                                                                                                                                                                                                                                                                                                                                                           |  |                                                                  |                   |                                                                   |                   |                                     |                   |                                 |                   |                                  |                   |                                 |             |                        |                           |                |                           |
| <b>Abstract:</b>                                                  | <p><b>Background</b><br/>Fusion of DNA methyltransferase domains to the nuclease-deficient clustered regularly interspaced short palindromic repeat (CRISPR) associated protein 9 (dCas9) has been used for epigenome editing, but the specificities of these dCas9 methyltransferases have not been fully investigated.</p> <p><b>Findings</b><br/>We generated CRISPR-guided DNA methyltransferases by fusing the catalytic domain of DNMT3A or DNMT3B to the C terminus of the dCas9 protein from <i>S. pyogenes</i> and validated its on-target and global off-target characteristics. Using targeted quantitative bisulfite pyrosequencing, we prove that dCas9-BFP-DNMT3A and dCas9-BFP-DNMT3B can efficiently methylate the CpG dinucleotides flanking its target sites at different genomic loci (uPA and TGFBR3) in human embryonic kidney cells (HEK293T). Furthermore, we conducted whole genome bisulfite sequencing (WGBS) to address the specificity of our dCas9 methyltransferases. WGBS revealed that although dCas9-BFP-DNMT3A and dCas9-BFP-DNMT3B did not cause global methylation changes, a substantial number (over 1000) of off-target differentially methylated regions (DMRs) were identified. The off-target DMRs, which were hypermethylated in cells expressing dCas9 methyltransferase and gRNAs, were predominantly found in promoter regions, 5' untranslated regions, CpG islands, and DNase I hypersensitivity sites, whereas, unexpected hypomethylated off-target DMRs were significantly enriched in repeated sequences. Through chromatin immunoprecipitation with massive parallel DNA sequencing analysis, we further revealed that these off-target DMRs were weakly correlated with dCas9 off-target binding sites. Using qPCR, RNA sequencing and fluorescence reporter cells, we also found that dCas9-BFP-DNMT3A and dCas9-BFP-DNMT3B can mediate transient inhibition of gene expression, which might be caused by dCas9-mediated de novo DNA methylation as well as interference with transcription.</p> <p><b>Conclusion</b><br/>Our results prove that dCas9 methyltransferases cause efficient RNA-guided methylation of specific endogenous CpGs. However, there is significant off-target methylation indicating that further improvements of the specificity of CRISPR-dCas9 based DNA methylation modifiers are required.</p> |  |                                                                  |                   |                                                                   |                   |                                     |                   |                                 |                   |                                  |                   |                                 |             |                        |                           |                |                           |

|                                                      |                                                                                                                                                                                                                                                                                                                                                                                                                                                                                                                                                                                                                                                                                                                                                                                                                                                                                                                                  |
|------------------------------------------------------|----------------------------------------------------------------------------------------------------------------------------------------------------------------------------------------------------------------------------------------------------------------------------------------------------------------------------------------------------------------------------------------------------------------------------------------------------------------------------------------------------------------------------------------------------------------------------------------------------------------------------------------------------------------------------------------------------------------------------------------------------------------------------------------------------------------------------------------------------------------------------------------------------------------------------------|
| <b>Corresponding Author:</b>                         | Yonglun Luo<br>Aarhus Universitet Health<br>Aarhus, DENMARK                                                                                                                                                                                                                                                                                                                                                                                                                                                                                                                                                                                                                                                                                                                                                                                                                                                                      |
| <b>Corresponding Author Secondary Information:</b>   |                                                                                                                                                                                                                                                                                                                                                                                                                                                                                                                                                                                                                                                                                                                                                                                                                                                                                                                                  |
| <b>Corresponding Author's Institution:</b>           | Aarhus Universitet Health                                                                                                                                                                                                                                                                                                                                                                                                                                                                                                                                                                                                                                                                                                                                                                                                                                                                                                        |
| <b>Corresponding Author's Secondary Institution:</b> |                                                                                                                                                                                                                                                                                                                                                                                                                                                                                                                                                                                                                                                                                                                                                                                                                                                                                                                                  |
| <b>First Author:</b>                                 | Lin Lin                                                                                                                                                                                                                                                                                                                                                                                                                                                                                                                                                                                                                                                                                                                                                                                                                                                                                                                          |
| <b>First Author Secondary Information:</b>           |                                                                                                                                                                                                                                                                                                                                                                                                                                                                                                                                                                                                                                                                                                                                                                                                                                                                                                                                  |
| <b>Order of Authors:</b>                             | Lin Lin                                                                                                                                                                                                                                                                                                                                                                                                                                                                                                                                                                                                                                                                                                                                                                                                                                                                                                                          |
|                                                      | Yong Liu                                                                                                                                                                                                                                                                                                                                                                                                                                                                                                                                                                                                                                                                                                                                                                                                                                                                                                                         |
|                                                      | Fengping Xu                                                                                                                                                                                                                                                                                                                                                                                                                                                                                                                                                                                                                                                                                                                                                                                                                                                                                                                      |
|                                                      | Jingrong Huang                                                                                                                                                                                                                                                                                                                                                                                                                                                                                                                                                                                                                                                                                                                                                                                                                                                                                                                   |
|                                                      | Tina Fuglsang Daugaard                                                                                                                                                                                                                                                                                                                                                                                                                                                                                                                                                                                                                                                                                                                                                                                                                                                                                                           |
|                                                      | Trine Skov Petersen                                                                                                                                                                                                                                                                                                                                                                                                                                                                                                                                                                                                                                                                                                                                                                                                                                                                                                              |
|                                                      | Bettina Hansen                                                                                                                                                                                                                                                                                                                                                                                                                                                                                                                                                                                                                                                                                                                                                                                                                                                                                                                   |
|                                                      | Lingfei ye                                                                                                                                                                                                                                                                                                                                                                                                                                                                                                                                                                                                                                                                                                                                                                                                                                                                                                                       |
|                                                      | Qing Zhou                                                                                                                                                                                                                                                                                                                                                                                                                                                                                                                                                                                                                                                                                                                                                                                                                                                                                                                        |
|                                                      | Fang Fang                                                                                                                                                                                                                                                                                                                                                                                                                                                                                                                                                                                                                                                                                                                                                                                                                                                                                                                        |
|                                                      | Shengting Li                                                                                                                                                                                                                                                                                                                                                                                                                                                                                                                                                                                                                                                                                                                                                                                                                                                                                                                     |
|                                                      | Lasse Fløe                                                                                                                                                                                                                                                                                                                                                                                                                                                                                                                                                                                                                                                                                                                                                                                                                                                                                                                       |
|                                                      | Kristopher Torp Jensen                                                                                                                                                                                                                                                                                                                                                                                                                                                                                                                                                                                                                                                                                                                                                                                                                                                                                                           |
|                                                      | Ellen Shrock                                                                                                                                                                                                                                                                                                                                                                                                                                                                                                                                                                                                                                                                                                                                                                                                                                                                                                                     |
|                                                      | Huanming Yang                                                                                                                                                                                                                                                                                                                                                                                                                                                                                                                                                                                                                                                                                                                                                                                                                                                                                                                    |
|                                                      | Jian Wang                                                                                                                                                                                                                                                                                                                                                                                                                                                                                                                                                                                                                                                                                                                                                                                                                                                                                                                        |
|                                                      | Xun Xu                                                                                                                                                                                                                                                                                                                                                                                                                                                                                                                                                                                                                                                                                                                                                                                                                                                                                                                           |
|                                                      | Lars Bolund                                                                                                                                                                                                                                                                                                                                                                                                                                                                                                                                                                                                                                                                                                                                                                                                                                                                                                                      |
|                                                      | Anders Lade Nielsen                                                                                                                                                                                                                                                                                                                                                                                                                                                                                                                                                                                                                                                                                                                                                                                                                                                                                                              |
|                                                      | Yonglun Luo                                                                                                                                                                                                                                                                                                                                                                                                                                                                                                                                                                                                                                                                                                                                                                                                                                                                                                                      |
| <b>Order of Authors Secondary Information:</b>       |                                                                                                                                                                                                                                                                                                                                                                                                                                                                                                                                                                                                                                                                                                                                                                                                                                                                                                                                  |
| <b>Response to Reviewers:</b>                        | <p>Responses to Reviewers:</p> <p>Reviewer one:<br/>Major comments<br/>1. There seems to be a lack of integration for the analyses of the three genome-wide datasets, i.e. RNA-seq, bisulfite sequencing, and ChIP. An integrated analysis would potentially uncover the molecular mechanisms for off-target gene expression changes. The authors commented on the lack of strong correlation between ChIP signal and methylation changes, but it is equally important to know whether gene expression changes can be explained by dCas9 binding and / or methylation changes at the promoter/enhancer.</p> <p>Re: In the revision, we have conducted integrative analysis between gene expression and methylation changes in promoter, between gene expression and dCas9 binding. In general, the correlation between changes in gene expression and either promoter methylation or binding is very weak (Revised Fig. 8g).</p> |

2.It's been known ChIP signal can be highly biased towards open chromatin in a non-specific manner, and thus it is crucial to call peaks with a control IP sample. It is unclear whether this is what the authors have done. My previous experience with dCas9 ChIP is that a pairwise peak calling strategy helps remove the majority of non-specific peaks (Wu et al 2014 Nat Biotech). A cleaner set of peaks may reveal much stronger correlation between binding and methylation changes, and / or gene expression changes. Similar strategy may be used for calling differentially methylated regions.

Re: In the revision, we have conducted two more ChIP repeats. The peak call was conducted pairwise to the control input sample, which is now described in the revised manuscript. Only peaks that were found in the three independent ChIP repeats were considered as off-target binding peaks. Peaks in repeated sequences and rDNA regions were removed similar to Wu et al.

For finding the differentially methylation regions, we in the revision used a more stringent parameter for filtering. First pairwise comparison was firstly conducted between control transfection and cells transfecting with higher amount of dCas9 fusion and gRNAs. These DMRs was then subjected to a dose- and gRNA-dependent methylation/demethylation filtering.

3.As the authors suggested, a single guide RNA, uPA T2, that is highly G-rich, or AG-rich in the seed region, can potentially be the cause of most off-target activities. Once the authors cleaned up the ChIP peaks using strategies recommend above, they can check the seed matches and see if peaks are dominated by this gRNA. If there is a strong correlation between binding and gene expression change, one can then also see if off-target binding of a particular gRNA is causing more gene expression changes. We previously showed the choice of gRNAs have huge effect on ChIP binding, it would be great to know whether similar design can help reduce off-targets in methylation and gene expression change.

Re: Thanks for the suggestions. We have included the discussion on why uPA T2 gRNA causes most off-target activity in the revision (Figure 8 and page 14-15).

4.The authors showed in Fig. 4 that thousands of genes changed expression upon transfecting uPA gRNAs and four fusion proteins (DNMT1, DNMT3A, DNMT3B, EGFP). However, it is unclear if the same set of genes changed in the same direction in all four cases. If this is the case, it would be more direct support for the model that the changes are caused by CRISPRi-type of effect, as proposed by the authors (line 460-462).

Re: Crossed-comparison was performed for the four groups of DEGs (Figure 8f). Only 18-32% of the genes were commonly found, indicating the existence other factors on gene expression changes. We have revised our previous conclusion of the findings.

#### Minor comments

1.Line 109: correct citations

2.Cite and comment on a previous work (PMID: 27662091) that studied the same question using ChIP-seq

3.The off-target activity at the GAPDH locus shown in supplementary fig 3 and supplementary figure 5 is very interesting. The pattern looks almost identical between fig s3b and fig s5b. It suggests that the off-target activity depends on dCas9 to be loaded with some guide RNA but doesn't matter what guide RNA is loaded. This seems to be consistent with the idea that loading of a guide RNA stabilizes the dCas9 protein, and higher abundance of the dCas9 protein leads to off-target activity at the GAPDH locus. The presence of off-target activity at the GAPDH locus but not SH2D3C/FAM221A loci despite the other way predicted by gRNA mismatches, suggest the GAPDH loci may be highly accessible and facilitates dCas9 binding. Is this supported by DHS and ChIP data?

4.Fig. 4: define FC. P values should be 1e-11 not 10e10

Re: All above comments have been addressed in the revision.

#### Reviewer #2:

1)In general, this study should be presented in a shorter format. The authors have undoubtedly created a lot of data and invested time and money in the study, however, the manuscript is difficult to read and is not very cohesive. For example, the CRISPRme1 and CRISPRme2 should probably be compared side by side.

RE: We have significantly streamlined the revised manuscript. Instead of presenting CRISPRme1 and CRISPRme 2 side by side. In the revised manuscript, we have supplemented the CRISPRme2 study as extended discussion in the supplementary file and cite this in the discussion. The CRISPRme2 system mainly address the question of gRNA-independent off-target effects.

2)I don't understand the argument that hypomethylated regions are "likely stochastic DMRs resulted from in vitro cell cultivation and manipulations", while hypermethylated regions have to be the consequence of CRISPRme off-targeting. Hypomethylated regions should be used as a metric for noise in the experiments and to access false positive rates. I am very worried that the number of hypomethylated DMRs is in the same range as the number of hypermethylated DNA (group 1: hypermethylated DMR (hyper-DMR) = 16169, hypomethylated DMR (hypo-DMR) = 11172; group 3: hyper-DMR = 12500, hypo-DMR = 11996). To me this suggests that the off target effects the authors see are merely an expression of noise in the system. Unless the authors can rectify this relation, I am afraid their study remains inconclusive or underpowered for a majority of the claims.

RE: To ensure the DMRs are resulted from expressing dCas9 methyltransferases and gRNAs, we have included a more stringent filtering steps for the identification of both hypermethylated and hypomethylated DMRs. There are clearly more hyper-methylated DMRs than hypomethylated ones. Furthermore, the genomic distributions of hypermethylated DMRs and hypomethylated DMRs are different (Revised Fig. 6 and Supplementary Fig. S9). In the revised manuscript, we have included both types of DMRs into analysis.

3)The authors find significant de novo methylation in of the uPA promoter with scrambled gRNAs, although to a slightly lower extent than the uPA targeting gRNA. I am surprised that these off target effects the authors describe (there was another one on GAPDH, I think) sampling so few loci do not translate into genome-wide elevations of methylation levels.

Re: Both uPA and GAPDH promoter are hypomethylated in HEK293T cells and located in open chromatin regions. Our study discovers that these off target hypermethylated DMRs are highly enriched in promoters, 5'UTR and CpG islands. Furthermore, even in the same promoter, e.g. GAPDH promoter, not all CpG sites are equally un-specifically methylated. This also explain why previous published dCas9 methyltransferase studies could find identify this off-target effect, as they only study a few selected CpGs.

Regarding the genome-wide elevations of methylation, since there are also sites which are demethylated due to expression of dCas9 and gRNAs, this will neutralize the general methylation level in cells.

In conclusion, I think the authors have done a significant amount of work, but I am wondering whether they are presenting the data in the best way possible and whether they are drawing the right conclusions. Maybe it would be best to concentrate on some core messages (inhibition not being methylation dependent, for example). I am especially worried about the off target effect conclusions, which in my opinion are not supported by the data.

Re: We have in the revision carefully re-analyzed our WGBS data, by including a more stringent filtering criteria, to ensure that the hypermethylated DMRs are off-target effects resulted from expressing dCas9 methyltransferase and gRNAs. Our data and results both WGBS and bisulfite pyrosequencing consistently support the finding that dCas9 methyltransferase can cause quite a number > 1,000 off-target DMRs, which is predominantly guided gRNAs. The off-target methylation effect is that robust as we had presented in the previous version. But the existence should definitely be aware, especially for those located in open chromatin regions.

Reviewer #3:

1)The methods part is describing in enough detail the experimental procedure, except for the WGBS sequencing section, where no protocol for library generation was provided. The authors should specify how the sequencing samples were prepared (library prep, which protocol PBAT or tagmentation or any other, number of amplification rounds that were used).

Re: Detail description of the WGBS protocol is now provided in the revision.

2)I have very serious doubts regarding the specificity analysis with WGBS. First, the authors performed only one biological repeat for WGBS per experimental sample, which does not allow to assess the natural variability (what they call as stochastic DMRs) in methylation state in the samples. Second, what, I consider even more troublesome a biased selection of the "valid" results is performed. As they write on pp.10 lines 275-277, the hypomethylated regions were omitted in the analysis and they argue that these are most likely caused by stochastic methylation changes. Of course methylation changes are observed in a cell population as reported in many published reports, however these can be both gain and loss of DNA methylation at various loci, otherwise in a longer run the global DNA methylation levels would become higher if only gain is observed. Therefore, I find it unjustified to select only DMRs that gain methylation and conclude that methylation gain is observed. The authors should show all the DMRs that are observed (with gain and loss of DNA). Because the second biological repeat for WGBS is missing, no conclusions about the stochasticity for the DMR can be made (even when using sophisticated statistical tests on a weak data basis).

Re: We really appreciate the comments and suggestions to the WGBS DMR analysis. In the revision, we have included both hypermethylated and hypomethylated DMRs into our results and discussion. Furthermore, since we have observed there is a dose-dependent and gRNA dependent methylation efficacy of the dCas9 methyltransferase, in addition to using the statistical test, we have applied a more stringent filtering step to identification of real DMRs.

3)Pp. 12, line 344: Regarding the repression results of the targeted genes. The authors observe a similar repression of the genes when targeted with wt or catalytically inactive MTase variants and conclude that the deposited DNA methylation does not repress transcription, but rather the sole dCas9-binding is responsible for this effect. However, the for both dCas9 binding and the location of DNA methylation regarding genes regulatory elements is critical, therefore these experiments by themselves do not allow to draw this conclusion.

Re: The previous conclusion has revised (page 15, last paragraph).

4)pp. 14, line 423-429: The authors note that reduced expression "does not appear to be due to de novo methylation" as similar repression effects are observed with dCas9 control fusions. However, it is known that dCas9 can interfere with binding RNA polymerase and/or other components in the TSS/gene body, yet the exact position of gRNA/dCas9 binding is important for blockage and in this case can have a major effect, nevertheless the effect of DNA methylation cannot be excluded. Especially, since targeted DNA methylation is not stable and gradually disappears with cell division, similarly as the expression of the targeting constructs.

Re: Our conclusion for methylation and expression changes have been carefully revised in the revision (section 4.7 and discussion).

5)Page 18, lines 575-578: I don't understand how hypomethylated DMRs are due to stochastic methylation, yet the hypermethylated DMRs are due to off-target methylation. This assumption made by the authors introduces a very strong bias in the data analysis and leads to wrong conclusions! Moreover, in the absence of a second biological replicate, it is impossible to discern which DMRs are due to stochastic or targeted methylation. Overall, for me, no valid conclusions can be drawn from this analysis in the current form.

Re: In the revision, we have included both hyper and hypo DMRs in the analysis. Furthermore, more carefully and detailed analyses of these DMRs were conducted.

Minor points:

1)pp. 12, line 376: Previous work of others, where Dnmt3a or Dnmt3a3L catalytic mutants were targeted using dCas9, showed that the cellular DNA methylation machinery is not recruited as there was no targeted methylation observed when targeting the mutants.

2)Page 16, line 495: It seems to me that the CRISPRme2.0 might suffer from protein folding issues possibly due to shorter linker between the dCas9 and the MTase

Re: Above points have been addressed in the revision. For the CRISPRme2.0, we have seen that expressing the DNMT3A only cause dramatic off-target methylation of the GAPHD promoter. The shorter linker makes dCas9-DNMT3A more easily entering the nucleus compared to dCas9-BFP-DNMT3A. In addition, to streamline the

|                                                                                                                                                                                                                                                                                                                                                                                                                                                                                                                                     |                                                                                                                                                                                                                                                                                                                                                                                                                                                                                                                                                                                                                                                                                                                                                                                                                                                                                                                                               |
|-------------------------------------------------------------------------------------------------------------------------------------------------------------------------------------------------------------------------------------------------------------------------------------------------------------------------------------------------------------------------------------------------------------------------------------------------------------------------------------------------------------------------------------|-----------------------------------------------------------------------------------------------------------------------------------------------------------------------------------------------------------------------------------------------------------------------------------------------------------------------------------------------------------------------------------------------------------------------------------------------------------------------------------------------------------------------------------------------------------------------------------------------------------------------------------------------------------------------------------------------------------------------------------------------------------------------------------------------------------------------------------------------------------------------------------------------------------------------------------------------|
|                                                                                                                                                                                                                                                                                                                                                                                                                                                                                                                                     | <p>manuscript as suggested by the 2nd reviewer. We have separated the CRISPRme2.0 system as one additional supplementary file.</p> <p>Overall, I recognize that the authors performed lots of high-end experiments that attempt to investigate the specificity of targeted DNA methylation in the cells. However, in my opinion the work partially suffers from lack of novelty (for the dCas9 targeting constructs - despite having Dnmt3b), the WGBS data analysis and interpretation suffers from the lack of second repeat and strong bias in DMR analysis and in my opinion the conclusion that DNA methylation does not contribute to gene repression is not enough supported by experimental results presented and alternative explanations are possible.</p> <p>Re: In the revision, we have carefully analyzed our WGBS data, repeated the ChIP experiments, and revised our conclusions on gene expression and DNA methylation.</p> |
| <b>Additional Information:</b>                                                                                                                                                                                                                                                                                                                                                                                                                                                                                                      |                                                                                                                                                                                                                                                                                                                                                                                                                                                                                                                                                                                                                                                                                                                                                                                                                                                                                                                                               |
| <b>Question</b>                                                                                                                                                                                                                                                                                                                                                                                                                                                                                                                     | <b>Response</b>                                                                                                                                                                                                                                                                                                                                                                                                                                                                                                                                                                                                                                                                                                                                                                                                                                                                                                                               |
| Are you submitting this manuscript to a special series or article collection?                                                                                                                                                                                                                                                                                                                                                                                                                                                       | No                                                                                                                                                                                                                                                                                                                                                                                                                                                                                                                                                                                                                                                                                                                                                                                                                                                                                                                                            |
| <p><b>Experimental design and statistics</b></p> <p>Full details of the experimental design and statistical methods used should be given in the Methods section, as detailed in our <a href="#">Minimum Standards Reporting Checklist</a>. Information essential to interpreting the data presented should be made available in the figure legends.</p> <p>Have you included all the information requested in your manuscript?</p>                                                                                                  | Yes                                                                                                                                                                                                                                                                                                                                                                                                                                                                                                                                                                                                                                                                                                                                                                                                                                                                                                                                           |
| <p><b>Resources</b></p> <p>A description of all resources used, including antibodies, cell lines, animals and software tools, with enough information to allow them to be uniquely identified, should be included in the Methods section. Authors are strongly encouraged to cite <a href="#">Research Resource Identifiers</a> (RRIDs) for antibodies, model organisms and tools, where possible.</p> <p>Have you included the information requested as detailed in our <a href="#">Minimum Standards Reporting Checklist</a>?</p> | Yes                                                                                                                                                                                                                                                                                                                                                                                                                                                                                                                                                                                                                                                                                                                                                                                                                                                                                                                                           |
| <p><b>Availability of data and materials</b></p> <p>All datasets and code on which the conclusions of the paper rely must be either included in your submission or deposited in <a href="#">publicly available repositories</a> (where available and ethically appropriate), referencing such data using</p>                                                                                                                                                                                                                        | Yes                                                                                                                                                                                                                                                                                                                                                                                                                                                                                                                                                                                                                                                                                                                                                                                                                                                                                                                                           |

a unique identifier in the references and in the "Availability of Data and Materials" section of your manuscript.

Have you have met the above requirement as detailed in our [Minimum Standards Reporting Checklist?](#)

1  
2  
3  
4 **1 Genome wide determination of on-target and off-target characteristics for RNA-guided**  
5 **2 DNA Methylation by dCas9 methyltransferases**

6  
7  
8 4 Lin Lin <sup>1, 7, §</sup>, Yong Liu <sup>1, §</sup>, [Fengping Xu](#) <sup>2, 3, 4, §</sup>, [Jinrong Huang](#) <sup>2, 3, §</sup>, Tina Fuglsang Daugaard <sup>1</sup>,  
9 5 Trine Skov Petersen <sup>1</sup>, Bettina Hansen <sup>1</sup>, Lingfei Ye <sup>2</sup>, Qing Zhou <sup>2, 3</sup>, Fang Fang <sup>2, 3</sup>, Shengting Li  
10 6 <sup>1, 2</sup>, Lasse Fløe <sup>1</sup>, Kristopher Torp Jensen <sup>1</sup>, Ellen Shrock <sup>6</sup>, Huanming Yang <sup>2, 4</sup>, Jian Wang <sup>2, 4</sup>,  
11 7 Xun Xu <sup>2, 3, \*</sup>, Lars Bolund <sup>1, 2, 3, 7</sup>, Anders Lade Nielsen <sup>1</sup>, Yonglun Luo <sup>1, 2, 7, 8\*</sup>  
12 8

13  
14 9 Initials for authors:

15 10 L.L., Y.Liu., F.X., J.H., T.F.D., T.S.P., B.H., L.Y., Q.Z., F.F., S.L., L.F., E.S., H.Y., J.W., X.X., L.B.,  
16 11 A.L.N., Y.L.  
17 12

18 13 Affiliations for authors:

- 19 14 1. Department of Biomedicine, Aarhus University, Aarhus, Denmark  
20 15 2. BGI-Shenzhen, Shenzhen 518083, China  
21 16 3. [BGI-Research, China National GeneBank-Shenzhen, Shenzhen 518083, China](#)  
22 17 4. Department of Biology, University of Copenhagen, Copenhagen, Denmark  
23 18 5. James D. Watson Institute of Genome Sciences, Hangzhou 310058, China  
24 19 6. Department of Genetics, Harvard Medical School, Boston, MA, USA.  
25 20 7. Danish Regenerative Engineering Alliance for Medicine (DREAM), Department of Biomedicine,  
26 21 Aarhus University, Aarhus, Denmark  
27 22 8. BrainStem - Stem Cell Center of Excellence in Neurology, Copenhagen, Denmark

28 23 §. These authors contributed equally to the study

29 24 \*. All correspondence should be addressed to Xun Xu ([XUXUN@GENOMICS.CN](mailto:XUXUN@GENOMICS.CN)) and Yonglun  
30 25 Luo ([ALUN@BIOMED.AU.DK](mailto:ALUN@BIOMED.AU.DK))  
31 26  
32 27

33 28 **Emails:**

34 29 Lin Lin: [lin.lin@biomed.au.dk](mailto:lin.lin@biomed.au.dk)  
35 30 Yong Liu: [liuyongbox@gmail.com](mailto:liuyongbox@gmail.com)  
36 31 Jinrong Huang: [huangjinrong@genomics.cn](mailto:huangjinrong@genomics.cn)  
37 32 Fengping Xu: [xufengping@genomics.cn](mailto:xufengping@genomics.cn)  
38 33 Tina Fuglsang Daugaard: [tfm@biomed.au.dk](mailto:tfm@biomed.au.dk)  
39 34 Trine Skov Petersen: [trinesp@biomed.au.dk](mailto:trinesp@biomed.au.dk)  
40 35 Bettina Hansen: [bhansen@biomed.au.dk](mailto:bhansen@biomed.au.dk)  
41 36 Lingfei Ye: [yelingfei@genomics.cn](mailto:yelingfei@genomics.cn)  
42  
43  
44  
45  
46  
47  
48  
49  
50  
51  
52  
53  
54  
55  
56  
57  
58  
59  
60  
61  
62  
63  
64  
65



1  
2  
3  
4 36 Qing Zhou: [zhouqing1@genomics.cn](mailto:zhouqing1@genomics.cn)  
5 37 Fang Fang: [fangfang@genomics.org.cn](mailto:fangfang@genomics.org.cn)  
6 38 Shengting Li: [lishengting@gmail.com](mailto:lishengting@gmail.com)  
7 39 Lasse Fløe: [lassefloe@gmail.com](mailto:lassefloe@gmail.com)  
8 40 Kristopher Torp Jensen: [kristopher.torp@gmail.com](mailto:kristopher.torp@gmail.com)  
9 41 Ellen Shrock: [ellen\\_shrock@g.harvard.edu](mailto:ellen_shrock@g.harvard.edu)  
10 42 Huanming Yang: [yanghm@genomics.cn](mailto:yanghm@genomics.cn)  
11 43 Jian Wang: [wangjian@genomics.cn](mailto:wangjian@genomics.cn)  
12 44 Xun Xu: [xuxun@genomics.cn](mailto:xuxun@genomics.cn)  
13 45 Lars Bolund: [bolund@biomed.au.dk](mailto:bolund@biomed.au.dk)  
14 46 Anders Lade Nielsen: [aln@biomed.au.dk](mailto:aln@biomed.au.dk)  
15 47 Yonglun Luo: [alun@biomed.au.dk](mailto:alun@biomed.au.dk)  
16  
17  
18  
19  
20  
21  
22  
23  
24  
25  
26  
27  
28  
29  
30  
31  
32  
33  
34  
35  
36  
37  
38  
39  
40  
41  
42  
43  
44  
45  
46  
47  
48  
49

1  
2  
3  
4  
5  
6  
7  
8  
9  
10  
11  
12  
13  
14  
15  
16  
17  
18  
19  
20  
21  
22  
23  
24  
25  
26  
27  
28  
29  
30  
31  
32  
33  
34  
35  
36  
37  
38  
39  
40  
41  
42  
43  
44  
45  
46  
47  
48  
49  
50  
51  
52  
53  
54  
55  
56  
57  
58  
59  
60  
61  
62  
63  
64  
65

50  
51

### Graphical Abstract

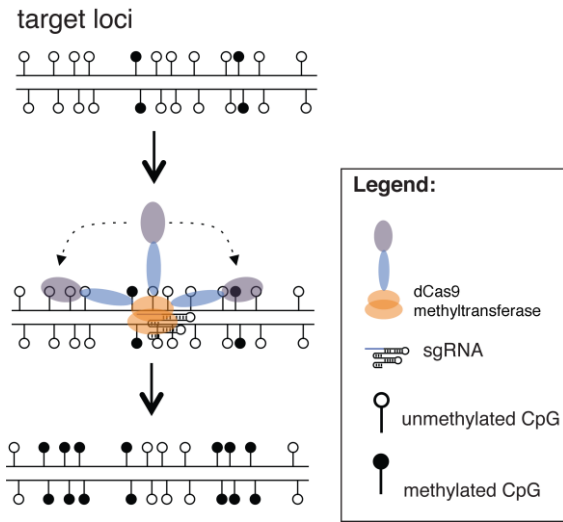

52

1  
2  
3  
4  
5  
6  
7  
8  
9  
10  
11  
12  
13  
14  
15  
16  
17  
18  
19  
20  
21  
22  
23  
24  
25  
26  
27  
28  
29  
30  
31  
32  
33  
34  
35  
36  
37  
38  
39  
40  
41  
42  
43  
44  
45  
46  
47  
48  
49  
50  
51  
52  
53  
54  
55  
56  
57  
58  
59  
60  
61  
62  
63  
64  
65  
66  
67  
68  
69  
70  
71  
72  
73  
74  
75  
76  
77  
78  
79  
80  
81  
82  
83  
84  
85  
86  
87  
88  
89  
90  
91

## 1. Abstract

### Background

Fusion of DNA methyltransferase domains to the nuclease-deficient clustered regularly interspaced short palindromic repeat (CRISPR) associated protein 9 (dCas9) has been used for epigenome editing, but the specificities of these dCas9 methyltransferases have not been fully investigated.

### Findings

We generated CRISPR-guided DNA methyltransferases by fusing the catalytic domain of DNMT3A or DNMT3B to the C terminus of the dCas9 protein from *S. pyogenes* and validated its on-target and global off-target characteristics. Using targeted quantitative bisulfite pyrosequencing, we prove that dCas9-BFP-DNMT3A and dCas9-BFP-DNMT3B can efficiently methylate the CpG dinucleotides flanking its target sites at different genomic loci (*uPA* and *TGFBR3*) in human embryonic kidney cells (HEK293T). Furthermore, we conducted whole genome bisulfite sequencing (WGBS) to address the specificity of our dCas9 methyltransferases. WGBS revealed that although dCas9-BFP-DNMT3A and dCas9-BFP-DNMT3B did not cause global methylation changes, a substantial number (over 1000) of off-target differentially methylated regions (DMRs) were identified. The off-target DMRs, which were hypermethylated in cells expressing dCas9 methyltransferase and gRNAs, were predominantly found in promoter regions, 5' untranslated regions, CpG islands, and DNase I hypersensitivity sites, whereas, unexpected hypomethylated off-target DMRs were significantly enriched in repeated sequences. Through chromatin immunoprecipitation with massive parallel DNA sequencing analysis, we further revealed that these off-target DMRs were weakly correlated with dCas9 off-target binding sites. Using qPCR, RNA sequencing and fluorescence reporter cells, we also found that dCas9-BFP-DNMT3A and dCas9-BFP-DNMT3B can mediate transient inhibition of gene expression, which might be caused by dCas9-mediated *de novo* DNA methylation as well as interference with transcription.

### Conclusion

Our results prove that dCas9 methyltransferases cause efficient RNA-guided methylation of specific endogenous CpGs. However, there is significant off-target methylation indicating that further improvements of the specificity of CRISPR-dCas9 based DNA methylation modifiers are required.

### Key words

DNA methylation – CRISPR – Cas9 – DNMT3A – DNMT3B – dCas9 – specificity – off-targets – genome wide

1  
2  
3  
4  
5  
6  
7  
8  
9  
10  
11  
12  
13  
14  
15  
16  
17  
18  
19  
20  
21  
22  
23  
24  
25  
26  
27  
28  
29  
30  
31  
32  
33  
34  
35  
36  
37  
38  
39  
40  
41  
42  
43  
44  
45  
46  
47  
48  
49  
50  
51  
52  
53  
54  
55  
56  
57  
58  
59  
60  
61  
62  
63  
64  
65

92 **2. Background**

93 Owing to its simplicity, efficiency and potential for multiplicity, the type II Clustered Regularly  
94 Interspaced Short Palindromic Repeats (CRISPR) and CRISPR-associated protein 9 (Cas9) with  
95 engineered variants have been widely used for genome and epigenome editing in many species  
96 [1-5]. The Cas9 protein is guided to a specific genomic locus containing a protospacer adjacent  
97 motif (PAM) by a small single guide RNA (gRNA), which contains a conserved scaffold sequence  
98 and a programmable guide sequence (typically 20 nt) for base pairing with the taret [1]. By  
99 introducing double mutations (D10A and H840A) in the *S.pyogenes* Cas9 protein (dCas9) to  
100 inactivate its catalytic activity and fusing functional effectors to the C terminus of the dCas9, the  
101 applications of CRISPR/Cas9 are expanded to regulation of gene expression (CRISPRa and  
102 CRISPRi) [6-8], targeted DNA purification [9], visualization of specific gene regions [10], and  
103 acetylation or methylation of chromatin components [11, 12].

104  
105 Genome-wide studies have revealed fundamental functional roles of DNA methylation as well as  
106 associations between aberrant DNA methylation and human diseases including cancer [13, 14].  
107 Methylation of cytosine residues (5mC) in the mammalian genome mainly occurs at CpG  
108 dinucleotides. In promoter regions CpG methylation normally associated with repression of gene  
109 expression. Currently, insights into DNA methylation-associated biological processes are largely  
110 based on correlative data. Methods have been developed to methylate desired gene loci  
111 selectively by fusing programmable DNA binding proteins (zinc finger proteins (ZFs) or  
112 transcription-activator-like effectors (TALEs)) to DNA methyltransferases<sup>3-9</sup>. However, the  
113 laborious generation of ZFs- and TALEs hampers their broader applications. Engineered dCas9  
114 has been harnessed for targeted DNA methylation by fusing dCas9 to the catalytic domain of  
115 mammalian DNA methyltransferases, thus providing an alternative tool for more easily  
116 programmable DNA methylation [15, 16].

117  
118 Currently, genome-wide characterization of the specificity of dCas9-based epigenetic modifiers is  
119 lacking. To gain more insights into the efficiency and specificity of targeted DNA methylation by  
120 CRISPR gRNA-guided dCas9 methyltransferases, we used quantitative bisulfite pyrosequencing,  
121 whole genome bisulfite sequencing, and CHIP-seq to investigate the characteristics of dCas9  
122 methyltransferase-mediated DNA methylation in human cells.

1  
2  
3  
4  
5  
6  
7  
8  
9  
10  
11  
12  
13  
14  
15  
16  
17  
18  
19  
20  
21  
22  
23  
24  
25  
26  
27  
28  
29  
30  
31  
32  
33  
34  
35  
36  
37  
38  
39  
40  
41  
42  
43  
44  
45  
46  
47  
48  
49  
50  
51  
52  
53  
54  
55  
56  
57  
58  
59  
60  
61  
62  
63  
64  
65

### 3. Methods

#### 3.1 Cell Culture

Human embryonic kidney HEK293T cells (ATCC) were cultured in Dulbecco's modified Eagle's medium (DMEM, Life Technologies), 10% fetal bovine serum (Sigma), 1% penicillin-streptomycin (Sigma), 1X GlutaMAX (Life Technologies) at 37 °C, 5% CO<sub>2</sub>.

#### 3.2 dCas9 methyltransferases plasmids

The dCas9 coding sequence was derived from pHR-SFFV-dCas9-BFP-KRAB (Addgene ID 46911) (a gift from Stanley Qi & Jonathan Weissman). The catalytic domains of DNMT1, DNMT3A and DNMT3B were PCR-amplified from pcDNA3/Myc-DNMT1 (Addgene ID 36939), pcDNA3/Myc-DNMT3A (Addgene ID 35521) and pcDNA3/Myc-DNMT3B1 (Addgene ID 35522) (a gift from Arthur Riggs), respectively. The DNMT3A (E752A) and DNMT3B (E697A) catalytically inactivating mutations were introduced by site-directed mutagenesis. All plasmids described in this study have been validated by Sanger sequencing and will be publically available through Addgene ([https://www.addgene.org/Yonglun\\_Luo/](https://www.addgene.org/Yonglun_Luo/)) ([Supplementary Table S1](#)).

#### 3.3 CRISPR gRNA design

Based on the observation that dCas9 methyltransferases could efficiently methylate the CpGs flanking the target sites, a web-based gRNA designing tool (dCas9 methyltransferases **gRNA finder**, <http://luolab.au.dk/views/gRNA.cgi>) was developed to facilitate dCas9 methyltransferase-based gRNA design. All updates regarding the dCas9 methyltransferase protocol are available on the website (<http://luolab.au.dk/>). All gRNA sequences are listed in [Supplementary Table S1](#).

#### 3.4 Transfection and enrichment transfected cells

Unless stated elsewhere, cells were transfected with gRNAs (total 500 ng) and a dCas9 methyltransferase expression vector (500 ng) in six-well plates using X-tremeGENE 9 DNA transfection reagent (Roche). For single gRNA or pUC19 control transfections, the amount of plasmid added was equivalent to the total amount of plasmid added for multiple gRNA transfections. For BFP-based enrichment, cells were harvested 48 hours after transfection, and dCas9 methyltransferase-expressing cells were sorted by FACS. Briefly, transfected cells were harvested by trypsinization, washed twice with 2% FBS-PBS, and re-suspended in 500 µL 2% FBS-PBS. Cells were stained with Propidium Iodide (PI) before sorting. PI negative and BFP positive or negative cells were sorted with a 4 Laser BD FACS Aria III instrument. All transfections were performed in at least two independent experiments.

#### 3.5 Quantitative PCR (qPCR)

Total RNA was extracted from cells with the RNeasy Plus Mini Kit (Qiagen, 74136) according to the manufacturer's instructions and quantified using a Nanodrop 1000 Spectrophotometer. The first strand cDNA was synthesized from 100-500 ng total RNA with the iScript cDNA synthesis kit (Bio-Rad, 170-8891) following the manufacturer's instructions. qPCR was performed in triplicate for each sample, using the Light Cycler 480 SYBR Green I Master mix (Roche Life Science, 04887352001) and a Light Cycler 480 qPCR machine. Each qPCR reaction contained 1 µL cDNA template (5 times diluted), 7.5 µL qPCR Master mix (2X), and 5 pmol of each qPCR primer in a total volume of 15 µL. The following qPCR program was used for *uPA*, *TGFBR3* and *GAPDH*: 1 cycle at 95 °C for 5 min; 45 cycles at 95 °C for 10s, 57 °C for 10s, and 72 °C for 10s during which the fluorescence signal was measured. The final product was subjected to melting curve analysis. Primers for qPCR are listed in [Supplementary Table S1](#). Relative gene expression was

1  
2  
3  
4 173 calculated using the  $2^{-\Delta\Delta CT}$  method by first normalizing to the internal control *GAPDH* ( $\Delta CT$ ) and  
5 174 then calibrating to the transfection control pUC19 ( $\Delta\Delta CT$ ) [17].  
6 175

### 8 176 **3.6 DNA methylation analysis by bisulfite pyrosequencing with PyroMark Q24**

9 177 Genomic DNA was extracted using the DNeasy Blood & Tissue Kit (Qiagen, 69506) according to  
10 178 the manufacturer's instructions. A total of 200 ng of genomic DNA was bisulfite treated using the  
11 179 EpiTect Bisulfite Kit (Qiagen, 59104) according to the manufacturer's instructions. This converts  
12 180 unmethylated cytosines to uracils. The bisulfite converted DNA was eluted with 20  $\mu$ L elution  
13 181 buffer provided by the kit. Bisulfite PCR reactions for all genes described in this study were  
14 182 performed in a 25  $\mu$ L volume containing 0.15  $\mu$ L Hotstar Taq polymerase (5U/ $\mu$ L) (New England  
15 183 Biolabs, M0495L), 2.5  $\mu$ L 10xStandard buffer, 0.5  $\mu$ L of 10 mM dNTPs, 1.0  $\mu$ L of each primer (10  
16 184  $\mu$ M) and 1.5  $\mu$ L bisulfite converted genomic DNA. PCR was performed under the following  
17 185 conditions: 95  $^{\circ}$ C for 5 min followed by 45 cycles of 94  $^{\circ}$ C for 30 sec, 58  $^{\circ}$ C for 1 min, and 72  $^{\circ}$ C  
18 186 for 45 sec, and, finally, by 72  $^{\circ}$ C for 7 min. 4  $\mu$ L PCR product was checked by gel electrophoresis.  
19 187 Pyrosequencing was performed with the PyroMark Q24 Advanced Reagents (Qiagen, 970922)  
20 188 using 20  $\mu$ L PCR product from the bisulfite treated DNA and 20  $\mu$ L sequencing primer (0.375  $\mu$ M)  
21 189 according to the PyroMark Q24 CpG protocol. The general degree of cytosine methylation was  
22 190 determined by pyrosequencing of the bisulfite converted genomic DNA, using the PyroMark Q24  
23 191 Advanced system (Qiagen).  
24 192

### 27 193 **3.7 DNA methylation analysis by bisulfite Sanger sequencing**

28 194 Bisulfite converted DNA was used as template for PCR amplifications with the BS specific PCR  
29 195 primers listed in **Supplementary Table S1**, using the DreamTaq DNA Polymerase (Life  
30 196 Technologies, EP0701). PCR products were gel purified, sub-cloned in a TA-cloning vector (Life  
31 197 Technologies, 450030) and transformed into chemically competent *E.coli* cells. Cell clones were  
32 198 manually picked, sub-cultured in 250  $\mu$ L LB medium overnight, lysed, subjected to Sanger  
33 199 sequencing and analyzed by BISMAR [18].  
34 200

### 37 201 **3.8 Fluorescence reporter cell assay**

38 202 Five stable fluorescence reporter cell clones were established by randomly inserting various  
39 203 copies of the CMV promoter-driven mCherry expression cassette into HEK293T (pLV-mCherry  
40 204 was a gift from Pantelis Tsoulfas, Addgene ID 36084). Cells were transfected separately with  
41 205 each dCas9 methyltransferase expression vector (50 ng) and gRNAs (total 50 ng) in 24-well  
42 206 plates. One-third of the transfected cells were seeded to a new plate every 2-3 days and the  
43 207 remainder used for flow cytometry analysis. Median mCherry intensity was measured with the BD  
44 208 LSRFortessa™ cell analyzer (FACS CORE facility, Aarhus University). Identical instrument  
45 209 settings and control beads were applied during the time course experiment to ensure valid  
46 210 comparison across different time points. 20,000 events were recorded for each sample. Flow  
47 211 cytometry data were analyzed using the Flowjo software.  
48 212

### 51 213 **3.9 Immunostaining**

52 214 48 hours after transfection, cells were fixed with freshly-made 4% PFA for 15 min at room  
53 215 temperature, followed by three washes with DPBS. Cells were permeabilized in 0.3% Triton X-  
54 216 100 DPBS for 10 min and blocked in 5% goat serum-DPBS for 30 min. Cells were incubated with  
55 217 a primary rabbit anti-HA-tag antibody (C29F4, Cell Signaling 3724, 1:1000) overnight, followed by  
56 218 secondary antibody staining with Alexa Fluor 555 donkey anti-rabbit IgG (A-31572, Life  
57 219 technologies) at room temperature for 2 hours. Images were obtained with a confocal microscope  
58 220 (LSM710, Carl Zeiss).  
59 221

1  
2  
3  
4  
5  
6  
7  
8  
9  
10  
11  
12  
13  
14  
15  
16  
17  
18  
19  
20  
21  
22  
23  
24  
25  
26  
27  
28  
29  
30  
31  
32  
33  
34  
35  
36  
37  
38  
39  
40  
41  
42  
43  
44  
45  
46  
47  
48  
49  
50  
51  
52  
53  
54  
55  
56  
57  
58  
59  
60  
61  
62  
63  
64  
65

### 3.10 Southern blot analysis

Genomic DNA (15 µg) was digested with *EcoRI* restriction enzyme overnight and then analyzed by gel electrophoresis with vacuum blotting. Primers for generating the mCherry probe are listed in **Supplementary Table S1**. Probe labelling was performed using the Prime-It II Random Primer Labeling Kit according to the manufacturer's instructions. Pre-hybridization and hybridization steps were carried out at 42 °C. Excess probe was washed from the membrane with SSC buffer, and the hybridization pattern was visualized on X-ray film by autoradiography.

### 3.11 RNA sequencing

Integrity and quantity of extracted RNA was evaluated with an Agilent 2100 Bioanalyzer according to the manufacturer's instructions. After DNase I treatment, mRNA was isolated with Oligo (dT) magnetic beads. Fragmentation buffer was added to generate short fragments of mRNA. cDNA was synthesized using the mRNA fragments as templates, resolved with EB buffer for end repair and ligated with adaptors. After size selection and purification by agarose gel electrophoresis, cDNA with sizes of approximately 240 bp were used for PCR amplification (12 cycles) and library construction. Libraries were sequenced on an Ion Proton platform (>30 million reads per sample). Sequencing reads that contained low quality, adaptor, and/or short (< 30nt) read sequences were filtered out before mapping. tmap was used to align the clean reads to the hg19 UCSC RefSeq (RNA sequences, GRCh37). No more than 3 mismatches were allowed in the alignment. Gene expression levels were calculated by transforming uniquely mapped transcript reads to TPM (transcript per million) [19]. Differentially expressed genes were defined as genes with a Benjamini-Hochberg-adjusted P value (FDR) ≤ 0.001 and fold change ≥ 2 compared to pUC19 control.

### 3.12 ChIP-seq

HEK293T cells were transfected with dCas9 methyltransferase and five *uPA* gRNAs (triplicates). 48 hours after transfection, transfected cells were subjected to ChIP with a commercially available kit ChIP-IT Express Enzymatic (53009-AF, ActivMotif, distributed by Nordic Biolabs) and an anti-HA tag antibody (C29F4, Cell Signaling) according to the manufacturer's instructions. Next generation sequencing libraries were prepared for Chip and input samples. SE50 sequencing was performed on Illumina HiSeq2500. Clean reads were mapped to human genome hg19 using SOAP2 with the parameter "-p 4 -v 2 -s 35". Unique mapping reads was sampled randomly and equally (62723057 reads). Peaks were called using MACS with P value 1e-3 compared to the input samples. Common peaks found in the triplicates were selected. Furthermore, ChIP peaks located in repeat sequences and rDNA were removed. Sequence motifs enriched within 70 bp of peak summits were identified using MEME-ChIP.

### 3.13 WGBS library preparation and sequencing

Genomic DNA was fragmented by sonication to a mean size of 250bp using a Bioruptor (Diagenode, Belgium), followed by the blunt-ending, dA addition to 3'-end, and adaptor ligation using the TruSeq Sample Preparation kit (Illumina Inc.) according to the manufacturer's instructions. Then, bisulfite conversion was conducted with the EZ DNA Methylation-Gold kit (ZYMO). The fragments with different insert size were excised from the same lane of a 2% TAE agarose gel. Products were purified by using QIAquick Gel Extraction kit (Qiagen) and amplified by 18 PCR cycles. The library quality was monitored using the Agilent 2100 BioAnalyzer (Agilent) and the concentration of the library was determined by quantitative PCR. Finally, the WGBS libraries were paired-end sequenced on Illumina HiSeq X Ten.

After filtering out adaptor and low-quality reads, a total of 953.7Gb 150bp paired-end clean data was generated. An average of 106Gb clean data was obtained for each sample. Clean reads

1  
2  
3  
4  
5  
6  
7  
8  
9  
10  
11  
12  
13  
14  
15  
16  
17  
18  
19  
20  
21  
22  
23  
24  
25  
26  
27  
28  
29  
30  
31  
32  
33  
34  
35  
36  
37  
38  
39  
40  
41  
42  
43  
44  
45  
46  
47  
48  
49  
50  
51  
52  
53  
54  
55  
56  
57  
58  
59  
60  
61  
62  
63  
64  
65

271 were aligned to the human reference genome (hg19) by BSMAP(v2.74) with the parameter “-u -v  
272 5 -z 33 -p 6 -n 0 -w 20 -s 16 -r 0 -f 10 -L 140” [20]. Only the CpG sites with read depths  $\geq 4$  were  
273 taken into consideration for DNA methylation level calculation. The 48502 bp lambda DNA  
274 genome was used as an extra reference for calculating the bisulphite conversion rate. Nearly  
275 complete ( $>99\%$ ) bisulfite conversion was documented in all libraries.

276  
277 **3.14 Identification of differentially methylated regions (DMRs) and attempts to exclude**  
278 **stochastic DMRs unrelated to the dCas9 methyltransferase treatment**

279 The bioconductor package DSS was used to identify DMRs with the parameter "delta  $\geq 0.1$ ,  
280 pvalue  $\leq 0.01$ , CpG sites  $\geq 3$ , DMR length  $\geq 10$  bp, smoothing window 100 bp". Since  
281 expressing high amount of dCas9-BFP-DNMT3A and either uPA or TGFBR3 gRNAs caused the  
282 highest *de novo* on-target methylation, we reasoned that the authentic off-target DMRs should be  
283 detected in these two comparisons. We first compared group 1 (dCas9-BFP-DNMT3A (500 ng) +  
284 uPA gRNAs (500 ng)) or group 3 (dCas9-BFP-DNMT3A (500 ng) + TGFBR3 gRNAs (500 ng)) to  
285 group 9 (pUC19 control).

286  
287 Based on the observation of (1) dose- and gRNA-dependent *de novo* methylation of *uPA*,  
288 *TGFBR3* and *GAPDH* by dCas9 methyltransferases and (2) dCas9-BGP-DNMT3A being more  
289 efficient than dCas9-BFP-DNMT3B, we reasoned that the authentic DMRs causes by dCas9  
290 methyltransferases and uPA gRNAs should have a methylation pattern as described below:

291  
292 **Hypermethylated DMRs by dCas9 methyltransferases and uPA gRNAs should meet:**

- 293 % mCpG:  
294 **(1) group 9** (pUC19)  $\leq$  **group 5** (dCas9-DNMT-3A only (500 ng))  $\leq$  **group 7** (dCas9-DNMT-3A  
295 (50 ng) + uPA gRNAs (50 ng))  $\leq$  **group 1** (dCas9-DNMT-3A (500 ng) + uPA gRNAs (500 ng)).  
296 **(2) group 2** (dCas9-DNMT-3B (500 ng) + uPA gRNAs (500 ng))  $\leq$  **group 1** (dCas9-DNMT-3A  
297 (500 ng) + uPA gRNAs (500 ng))  
298 **(3) group 6** (dCas9-DNMT-3B (500 ng))  $\leq$  **group 2** (dCas9-DNMT-3B (500 ng) + uPA gRNAs  
299 (500 ng))

300  
301 **Hypomethylated DMRs by dCas9 methyltransferases and uPA gRNAs should meet:**

- 302 % mCpG:  
303 **(1) group 9** (pUC19)  $\geq$  **group 5** (dCas9-DNMT-3A only (500 ng))  $\geq$  **group 7** (dCas9-DNMT-3A  
304 (50 ng) + uPA gRNAs (50 ng))  $\geq$  **group 1** (dCas9-DNMT-3A (500 ng) + uPA gRNAs (500 ng)).  
305 **(2) group 2** (dCas9-DNMT-3B (500 ng) + uPA gRNAs (500 ng))  $\geq$  **group 1** (dCas9-DNMT-3A  
306 (500 ng) + uPA gRNAs (500 ng))  
307 **(3) group 6** (dCas9-DNMT-3B (500 ng))  $\geq$  **group 2** (dCas9-DNMT-3B (500 ng) + uPA gRNAs  
308 (500 ng))

309  
310  
311 Similarly, the authentic DMRs caused by dCas9 methyltransferases and *TGFBR3* gRNAs should  
312 have a methylation pattern as described below:

313  
314 **Hypermethylated DMRs by dCas9 methyltransferases and TGFBR3 gRNAs should meet:**

- 315 % mCpG:  
316 **(1) group 9** (pUC19)  $\leq$  **group 5** (dCas9-DNMT-3A only (500 ng))  $\leq$  **group 8** (dCas9-DNMT-3A  
317 (50 ng) + TGFBR3 gRNAs (50 ng))  $\leq$  **group 3** (dCas9-DNMT-3A (500 ng) + TGFBR3 gRNAs  
318 (500 ng)).



1  
2  
3  
4  
5  
6  
7  
8  
9  
10  
11  
12  
13  
14  
15  
16  
17  
18  
19  
20  
21  
22  
23  
24  
25  
26  
27  
28  
29  
30  
31  
32  
33  
34  
35  
36  
37  
38  
39  
40  
41  
42  
43  
44  
45  
46  
47  
48  
49  
50  
51  
52  
53  
54  
55  
56  
57  
58  
59  
60  
61  
62  
63  
64  
65

319 **(2) group 4** (dCas9-DNMT-3B (500 ng) + TGFBR3 gRNAs (500 ng)) =< **group 3** (dCas9-DNMT-  
320 3A (500 ng) + TGFBR3 gRNAs (500 ng))  
321 **(3) group 6** (dCas9-DNMT-3B (500 ng)) =< **group 4** (dCas9-DNMT-3B (500 ng) + TGFBR3  
322 gRNAs (500 ng))  
323

**Hypomethylated DMRs by dCas9 methyltransferases and TGFBR3 gRNAs should meet:**

324 % mCpG:  
325  
326 **(1) group 9** (pUC19) >= **group 5** (dCas9-DNMT-3A only (500 ng)) >= **group 8** (dCas9-DNMT-3A  
327 (50 ng) + TGFBR3 gRNAs (50 ng)) >= **group 3** (dCas9-DNMT-3A (500 ng) + TGFBR3 gRNAs  
328 (500 ng)).  
329 **(2) group 4** (dCas9-DNMT-3B (500 ng) + TGFBR3 gRNAs (500 ng)) >= **group 3** (dCas9-DNMT-  
330 3A (500 ng) + TGFBR3 gRNAs (500 ng))  
331 **(3) group 6** (dCas9-DNMT-3B (500 ng)) >= **group 4** (dCas9-DNMT-3B (500 ng) + TGFBR3  
332 gRNAs (500 ng))  
333

334 We applied this methylation level-based filtering criteria to further remove potential stochastic  
335 DMRs. The remaining DMRs were subjected to all analyses as described in this study.  
336

**3.15 Analysis of 5nt-SEED-NGG motif density**

337 The 5nt-SEED-NGG density was calculated by counting the frequency of the sequence  
338 containing the 5 nt SEED sequences preceding a NGG site on either DNA strand. The PAM  
339 density was calculated by counting the frequency of PAM sites (NGG) on either DNA strand. The  
340 median density with standard deviation is shown in the plots. Fisher's exact test was conducted to  
341 compare densities between different sequence datasets.  
342

**3.16 Statistics**

343 All values in this study were presented as mean ± standard deviation. The one-way Analysis of  
344 Variance (ANOVA) with Bonferroni multiple testing, linear regression, Wilcoxon matched-pairs  
345 signed-rank test, Fisher's exact test and Benjamini-Hochberg-adjusted P value were used for  
346 statistical analysis. A p-value < 0.05 was considered statistically significant.  
347  
348  
349  
350

## 4 Results

### 4.1 On-target DNA methylation by dCas9 methyltransferases: dCas9-BFP-DNMT3A and dCas9-BFP-DNMT3B

In mammalian cells, DNA methylation is established by *de novo* DNA methyltransferases (DNMT3A and DNMT3B), and maintained upon replication by DNMT1 [21]. Using a similar approach as Vojta *et al.* and McDonald *et al.* [15, 16]., we fused DNMT1 catalytic domain, DNMT3A catalytic domain, DNMT3B catalytic domain or EGFP to the C-terminal end of dCas9 with a blue fluorescent protein (BFP) and a triple tandem repeated flexible linker (3XG4S, Gly-Gly-Gly-Gly-Ser) (Fig. 1a and Supplementary Fig. S1a). Enrichment of cells expressing the fusion dCas9 methyltransferases were validated by BFP-based Fluorescence Activated Cell Sorting (FACS) (Supplementary Fig. S1b) and immunofluorescence staining using anti-HA tag antibody (Supplementary Fig. S1c).

To validate that dCas9 methyltransferases can methylate endogenous CpGs, the dCas9 methyltransferases were first targeted by five gRNAs (*uPA* gRNA T1 to T5, Fig. 1b) to the *uPA* promoter, which contains a dense CpG island that is hypomethylated in human cancer cells [22]. HEK293T cells were transfected with *uPA* gRNAs and individual dCas9 fusion expression vectors. Following BFP-based FACS enrichment of transfected cells, the percentage of methylated CpGs (mCpGs) at individual CpG sites in the *uPA* promoter (*uPA*-MR1 and *uPA*-MR2 genomic regions) was quantified by bisulfite pyrosequencing (Fig. 1c). Compared to the pUC19 control, cells expressing *uPA* gRNAs and dCas9-BFP-DNMT3A or dCas9-BFP-DNMT3B, but not dCas9-BFP-DNMT1 or dCas9-BFP-EGFP, had significantly higher mCpG levels ( $P$  value < 0.01, ANOVA test). This is consistent with previous reports showing that the C-terminal catalytic domains of DNMT3A and DNMT3B, but not DNMT1, are active [23, 24]. The CpGs most efficiently *de novo* methylated were located 10-50 bp upstream and downstream of the gRNA target sites. CpGs located in the gRNA binding sites were not methylated by the dCas9 methyltransferases, most likely because CRISPR/dCas9 binding blocks the interaction of the methyltransferase domain with the CpGs (Fig. 1c). *De novo* methylation by dCas9-BFP-DNMT3A and gRNAs was further validated by bisulfite Sanger sequencing (Supplementary Fig. S1d).

To investigate dCas9 methyltransferase-mediated methylation of another genomic locus, we generated three gRNAs targeting the transforming growth factor beta receptor 3 (*TGFBR3*) promoter. Similar *de novo* methylation effects were observed for dCas9-BFP-DNMT3A or dCas9-BFP-DNMT3B with *TGFBR3* gRNAs (Fig. 1d-g; Supplementary Fig. S2). Our results collectively reveal that fusion of dCas9 to the catalytic domain of DNMT3A/3B can mediate targeted *de novo* DNA methylation.

### 4.2 Off-target methylation by dCas9 methyltransferases

Since high frequency off-target mutagenesis has been observed in previous applications of CRISPR-Cas9 [25], we investigated the specificity of dCas9 methyltransferases. For this purpose, we repeated the experiment with two additional controls: (1) cells expressing dCas9-BFP-DNMT3A or dCas9-BFP-DNMT3B only; (2) cells expressing dCas9-BFP-DNMT3A or dCas9-BFP-DNMT3B and three scrambled gRNAs (gRNAs targeting the CMV promoter). We found that expression of dCas9 methyltransferases and scrambled gRNAs could cause some unspecific *de novo* methylation of the *uPA* promoter, but at much lower levels compared to that obtained for *uPA* gRNAs (Supplementary Fig. S3). A slightly increased *uPA* promoter methylation, although not significant, was also observed in cells expressing dCas9 methyltransferase only (Supplementary Fig. S3).

1  
2  
3  
4  
5  
6  
7  
8  
9  
10  
11  
12  
13  
14  
15  
16  
17  
18  
19  
20  
21  
22  
23  
24  
25  
26  
27  
28  
29  
30  
31  
32  
33  
34  
35  
36  
37  
38  
39  
40  
41  
42  
43  
44  
45  
46  
47  
48  
49  
50  
51  
52  
53  
54  
55  
56  
57  
58  
59  
60  
61  
62  
63  
64  
65

399  
400  
401  
402  
403  
404  
405  
406  
407  
408  
409  
410  
411  
412  
413  
414  
415  
416  
417  
418  
419  
420  
421  
422  
423  
424  
425  
426  
427  
428  
429  
430  
431  
432  
433  
434  
435  
436  
437  
438  
439  
440  
441  
442  
443  
444  
445  
446  
447

To further assess the off-target methylation, we investigated three genomic regions with various sequence similarities to the *uPA* gRNA target sites: *SH2D3C* (3 mismatches, **Supplementary Fig. S4a**), *FAM221A* (3 mismatches, **Supplementary Fig. S4b**), and *GAPDH* promoter (9 mismatches, **Fig. 2a**). We did not observe significant changes in CpG methylation at *SH2D3C* and *FAM221A* genomic sites. Surprisingly, several CpG sites in the *GAPDH* promoter were significantly methylated in cells expressing dCas9-BFP-DNMT3A and *uPA*, *TGFBR3*, or scrambled (CMV) gRNAs (**Fig. 2b-c**). The same was observed, but to a lesser extent, in cells expressing dCas9-BFP-DNMT3B (**Fig. 2d-e**). This effect was less prominent in cells expressing dCas9 methyltransferase only, indicating that unspecific methylation of the *GAPDH* promoter is RNA-guided. Our results collectively reveal the existence of site dependent off-target methylation by dCas9 methyltransferases.

### 4.3 Effects of DNMT3A/3B catalytic activity and dCas9 methyltransferase expression level on on-target and off-target DNA methylation

*De novo* methylation by dCas9 methyltransferases could be mediated either by the catalytic activity of DNMT3A and DNMT3B, or by the recruitment of additional DNA methylation enzymes to the binding sites facilitated by protein interactions. To elucidate the mechanism of on-target and off-target DNA methylation, we introduced the E752A and E697A catalytically inactivating mutations [26] in the DNMT3A and DNMT3B catalytic domains, respectively. To investigate the effect of dCas9 methyltransferase expression levels on on-target and off-target DNA methylation, cells were sorted into four populations based on BFP signal intensity, a marker of dCas9 methyltransferase expression level: 1. very low: +; 2. low: ++; 3. medium: +++; and 4. high: ++++ (**Fig. 3a**). Bisulfite pyrosequencing analysis of the *uPA* (**Fig. 3b**) and *TGFBR3* (**Fig. 3c**, **Supplementary Fig. S5**) promoters revealed that only dCas9 methyltransferases but not dCas9 methyltransferase catalytic mutants cause dose-dependent *de novo* methylation, suggesting that *de novo* on-target methylation by dCas9 methyltransferases is mediated by the catalytic activity of DNMT3A and DNMT3B.

We next investigated the effect of dCas9 methyltransferase expression level on off-target methylation by analyzing the *GAPDH* promoter methylation in the FACS-sorted cells with different BFP signal intensity (+, ++, +++, and ++++). Consistent with previous results, co-expression of dCas9-BFP-DNMT3A or dCas9-BFP-DNMT3B (**Fig. 4a, b**) with either *uPA* or *TGFBR3* gRNAs significantly increased *de novo* methylation of *GAPDH* promoter CpGs compared to cells expressing dCas9 methyltransferase without gRNAs or pUC19. Furthermore, titrating dCas9 methyltransferase expression levels decreased unspecific methylation of the *GAPDH* promoter (**Fig. 4a, b**). Similarly, methyltransferase catalytic mutants do not cause *de novo* methylation of *GAPDH*. Since *de novo* methylation of gRNA-targeted genes was also decreased by dCas9 methyltransferase titration (**Fig. 3**), our results collectively suggest that altering dCas9 methyltransferase expression levels cannot efficiently reduce unspecific methylation relative to targeted methylation.

To investigate global methylation levels, repetitive *LINE1* elements were investigated as they represent a surrogate marker for global DNA methylation [27]. We measured the *LINE1* 5'UTR methylation by bisulfite pyrosequencing which revealed that expression of dCas9-BFP-DNMT3A and *uPA* gRNAs did not result in significant *LINE1* methylation changes (**Fig. 4c**).

### 4.4 Genome-wide bisulfite sequencing revealed off-target methylation by dCas9 methyltransferases

1  
2  
3  
4 448 Prompted by the unspecific methylation of *GAPDH* promoter by dCas9 methyltransferases, we  
5 449 investigated the genome-wide off-target methylation characteristics by CRISPR dCas9  
6 450 methyltransferases using whole-genome bisulfite sequencing (WGBS). WGBS were conducted in  
7 451 HEK293T cells transfected with (i) pUC19 (control), (ii) dCas9-BFP-DNMT3A or dCas9-BFP-  
8 452 DNMT3B alone, and (iii) dCas9-BFP-DNMT3A or dCas9-BFP-DNMT3B with either *uPA* or  
9 453 *TGFBR3* gRNAs with two difference doses (50 ng or 500 ng) (**Supplementary Fig. S6a**). Using  
10 454 the Illumina HiSeq X platform, we generated over 100 giga bases (Gb) of clean data for each  
11 455 sample (more than 30X coverage with a 99.5% bisulfite conversion rate). This allowed us to  
12 456 analyze the methylation pattern at single-base pair resolution. Since mainly CpG dinucleotides  
13 457 are subject to methylation in HEK293T cells (**Supplementary Fig. S6b**), all following analyses  
14 458 are based on CpG methylation in the entire genome (approximately 40,000,000 CpG sites). We  
15 459 firstly examined *uPA*, *TGFBR3* and *GAPDH* promoter methylation as revealed by WGBS in all  
16 460 nine groups. WGBS confirmed that the *uPA* and *TGFBR3* gRNAs could target dCas9-BFP-  
17 461 DNMT3A or dCas9-BFP-DNMT3B to the *uPA* and *TGFBR3* loci and methylate CpGs flanking the  
18 462 gRNA binding sites in a dose- and gRNA-dependent manner (**Fig. 5**). Furthermore, our WGBS  
19 463 data revealed that some dCas9 methyltransferase-mediated *de novo* methylation of *uPA*,  
20 464 *TGFBR3* and *GAPDH* (*off-target*) promoters occurred in a broad region surrounding the gRNA  
21 465 binding site.

22 466  
23 467 Next, we analyzed the global DNA methylation profile. Consistent with the *LINE1* assay (**Fig. 3c**),  
24 468 expression of dCas9 methyltransferase alone or together with gRNAs was not associated with  
25 469 global methylation changes (**Supplementary Fig. S6c, d**). Since we have only one replicate per  
26 470 group and stochastic methylations frequently occur in cancer cells during cultivation [28], we  
27 471 analyzed the data with DSS-single (a method developed by Wu et al. for detecting differentially  
28 472 methylated regions (DMRs) from WGBS data without replicates [29]) to identify differentially  
29 473 methylated regions (DMRs) caused by dCas9 methyltransferase and gRNAs. Firstly, we  
30 474 compared cells transfected with dCas9 methyltransferases with or without gRNAs to control cells  
31 475 (transfected with pUC19 control plasmid). Over 10,000 hyper or hypo DMRs were identified by  
32 476 DSS-single (**Supplementary Fig. S7**). Secondly, based on the observation that: (1) there is  
33 477 dose- and gRNA-dependency of *uPA*, *TGFBR3* and *GAPDH* methylation by dCas9  
34 478 methyltransferase and (2) dCas9-BFP-DNMT3A is more efficient than dCas9-BFP-DNMT3B, we  
35 479 applied a stringent filtering step to remove potentially stochastic DMRs. Following this filtering, we  
36 480 identified over 1000 DMRs resulting from dCas9 methyltransferase together with either *uPA*  
37 481 gRNAs (hypermethylated DMRs (hyper-DMRs) = 3671; hypomethylated DMRs (hypo-DMRs) =  
38 482 1807) or *TGFBR3* gRNAs (hyper-DMRs = 2267; hypo-DMRs = 1662) (**Supplementary Table S2-  
39 483 S5**). These DMRs were on average 63-81 bp and contained an average of 5-9 CpGs  
40 484 (**Supplementary Fig. S8**). The average methylation levels of these hyper/hypo-DMRs differ  
41 485 significantly between pUC19 control cells, cells expressing dCas9 methyltransferase only, cells  
42 486 expressing low amounts of dCas9 methyltransferase and gRNAs, and cells expressing high  
43 487 amounts of dCas9 methyltransferase and gRNAs (**Fig. 6a, Supplementary Fig. S9a**). Only a  
44 488 very small portion of the DMRs (hyper-DMRs = 192; hypo-DMRs = 81) were commonly found  
45 489 among DMRs caused by dCas9 methyltransferase and *uPA* compared to *TGFBR3* gRNAs (**Fig.  
46 490 6b**), suggesting that the majority of the off-target DMRs are RNA-guided. Taken together, our  
47 491 WGBS result revealed that expression of dCas9 methyltransferases together with gRNAs can  
48 492 cause substantial off-target methylation.

#### 493 494 **4.5 Characteristics of dCas9 methyltransferase off-targets**

495 496 To better describe the characteristics of dCas9 methyltransferase off-targets, we stratified hyper-  
and hypo-DMRs according to their localization in particular types of genomic regions, including

1  
2  
3  
4  
5  
6  
7  
8  
9  
10  
11  
12  
13  
14  
15  
16  
17  
18  
19  
20  
21  
22  
23  
24  
25  
26  
27  
28  
29  
30  
31  
32  
33  
34  
35  
36  
37  
38  
39  
40  
41  
42  
43  
44  
45  
46  
47  
48  
49  
50  
51  
52  
53  
54  
55  
56  
57  
58  
59  
60  
61  
62  
63  
64  
65

497 promoters, coding sequences (CDS), introns, 5' untranslated regions (5-UTR), 3-UTR, CpG  
498 islands (CGI), CGI shores, Alu sequences, LINE1 (L1) sequences, and LINE2 (L2) sequences.  
499 Our results showed that hyper-DMRs were predominantly enriched in promoters, 5-UTR and CGI,  
500 whereas hypo-DMRs were enriched in repeated sequences Alu and LINE1 (Fig. 6c-d,  
501 Supplementary Fig. S9b-c). Consistent with this finding, a metaplot of average methylation  
502 levels for all genes before the DSS-single call also showed that transcription start site flanking  
503 regions (overlapping with promoters and 5'UTR) were hypermethylated in cells expressing dCas9  
504 methyltransferase and gRNAs (Supplementary Fig. 10).

506 Since dCas9 preferentially binds open chromatin regions [30], we further analyzed DNase I  
507 hypersensitivity regions based on ENCODE data from HEK293T cells (GEO#: GSM1008573) and  
508 quantified the average methylation level in DNase I hypersensitivity sites (DHS) (as an indication  
509 of sites with an open chromatin state). The DHS flanking regions (1 kb upstream and  
510 downstream) were used as a control. Compared to cells transfected with pUC19, cells expressing  
511 dCas9 methyltransferase and gRNAs had significantly higher methylation levels in the DHS sites  
512 (P value < 0.05; Wilcoxon matched-pairs signed-rank test) (Fig. 6e, Supplementary Fig. 9d).  
513 Furthermore, only hyper-DMRs but not hypo-DMRs were significantly enriched in DHS (P value <  
514 1e-300, Fisher's exact test, Fig. 6f-g and Supplementary Fig. 9e-f), which collectively suggests  
515 that open chromatin regions are prone to unspecific methylation by dCas9 methyltransferase and  
516 gRNAs.

518 Previous studies have discovered that complementary base pairing between gRNA guide  
519 sequences and the PAM-proximal 5nt region (5ntSEED-PAM) is crucial for off-target binding [30,  
520 31]. We also assessed the density of individual gRNA 5ntSEED-PAM sequence (5'-NNNNNNGG-  
521 3') in the hyper- and hypo-DMRs. For each DMR, we included the 100-bp flanking sequences  
522 when calculating the presence of 5ntSEED-PAM sequence density. This is based on the previous  
523 observation that dCas9 methyltransferases methylate CpGs flanking the gRNA binding site. We  
524 consistently observed significant enrichment of 5ntSEED-PAM sequences for all gRNAs in the  
525 hyper-DMRs but not hypo-DMRs (Fig. 6h, Supplementary Fig. 9g). Taken together, this shows  
526 that, if guided by gRNAs, dCas9 methyltransferases can cause substantial off-target methylation  
527 of genomic regions with open chromatin accessibility i.e. promoters and 5'UTR, as well as CpG  
528 islands. Our finding between the off-target methylation and the chromatin accessibility is also  
529 consistent with our recent discovery that CRISPR/Cas9 cleaves more efficiently in euchromatin  
530 than heterochromatin regions [32].

532 **4.6 dCas9 methyltransferase-mediated hypermethylated DMRs are weakly correlated with**  
533 **off-target binding**

534 To further investigate the association between dCas9 methyltransferase off-target methylation  
535 and dCas9 off-target DNA binding, we studied off-target binding sites in HEK293T cells  
536 expressing dCas9 methyltransferase and uPA gRNAs using ChIP-seq. Using pair-wise  
537 comparison as previous approach for dCas9 [31], 805 enriched peaks (P value < 0.001,  
538 Supplementary Table S6) were identified. These ChIP peaks were scattered throughout the  
539 genome and significantly enriched in DHS genomic regions (Fig. 7a, b). Using MEME motif  
540 scanning of ChIP peaks [33], we identified the most significant motif GGGAGAGGGAGNGG (P =  
541 1.0e-593). This motif is identical to the 11-bp seed sequences of uPA gRNA T2  
542 (GAGCCGGGCGGGAGAGGGAG(GGG)) and the PAM (NGG) site (Fig. 7c), suggesting that T2  
543 is dominant compared to other uPA gRNAs in mediating off-target binding. Analysis of 5ntSEED-  
544 PAM sequence density further confirmed that uPA T2 binding sites were over-represented in the  
545 ChIP peaks (Fig. 7d). A previous study has shown that the choice of gRNAs has a great effect on

1  
2  
3  
4 546 dCas9 off-target binding [31]. The *uPA* gRNA T2 is highly G-rich or AG-rich in the seed region.  
5 547 This can potentially be the cause of most of the off-target activities. This could be the explanation  
6 548 of why we have found 40 times more off-target binding sites compared to the study by Liu et al.  
7 549 [34].  
8 550

9  
10 551 We next analyzed the correlation between the ChIP peaks and the *uPA* DMRs (including the  
11 552 flanking 100 bp of each DMR). There is a significantly increased overlap between ChIP peaks  
12 553 and *uPA* hyper-DMRs ( $p = 0.006$ , Fisher's exact test) but not *uPA* hypo-DMRs ( $p = 1$ , Fisher's  
13 554 exact test) (**Fig. 7e**). However, the percentage of *uPA* hyper-DMRs overlaps with ChIP peaks is  
14 555 still very low (11 out of 3671 hyper DMRs, 0.3%). Since the average methylation level of all ChIP  
15 556 peak regions exceeds 60% (**Supplementary Fig. 11**), and this may partially explain why there is  
16 557 a low correlation between ChIP peaks and DMRs given potential functional difficulty in further  
17 558 increasing the methylation level. Furthermore, ChIP-seq only identified sites to which the dCas9  
18 559 methyltransferase binds strongly.  
19  
20  
21

#### 22 561 **4.7 Effects of dCas9 methyltransferases on gene expression**

23 562 Methylation of promoter DNA can be correlated with inhibition of gene transcription. To determine  
24 563 whether the dCas9 methyltransferase-mediated *uPA* and *TGFBR3* promoter methylation could  
25 564 inhibit gene expression, we measured *uPA* and *TGFBR3* mRNA levels by quantitative PCR  
26 565 (qPCR) in HEK293T cells. Compared to the pUC19 transfection control, both *uPA* and *TGFBR3*  
27 566 expression was significantly decreased in cells expressing dCas9-BFP-DNMT3A or dCas9-BFP-  
28 567 DNMT3B and either *uPA* or *TGFBR3* gRNAs (**Fig. 8a**). However, the reduced *uPA* and *TGFBR3*  
29 568 expression does not appear to be only associated with the *de novo* DNA methylation by dCas9  
30 569 methyltransferases (**Fig. 8a**), as inactivating dCas9 methyltransferase mutants dCas9-BFP-  
31 570 DNMT3A(E752A) and dCas9-BFP-DNMT3B(E697A) also cause similar degrees of expression  
32 571 inhibition despite their lack of *de novo* DNA methylation activity.  
33  
34  
35

36 572  
37 573 To investigate whether the inhibition of gene expression is specific to the gRNA targeted genes,  
38 574 we conducted RNA sequencing in HEK293T cells expressing dCas9 methyltransferase and *uPA*  
39 575 gRNAs. A large number ( $> 1000$ ) of differentially expressed genes (DEG) significantly (FDR  $P$   
40 576 value  $< 0.001$ , fold change  $> 2$ ) were found in cells expressing *uPA* gRNAs and either dCas9-  
41 577 BFP-DNMT3A or dCas9-BFP-DNMT3B (**Fig. 8b-c**). However, similar effects on the global  
42 578 transcription profile were observed in cells expressing *uPA* gRNAs with dCas9-BFP-DNMT1 or  
43 579 with dCas9-BFP-EGFP lacking *de novo* DNA methylation activity (**Fig. 8d-e**). We cross-compared  
44 580 DEGs among the four groups and 342 (18-32%) genes were commonly identified (**Fig. 8f**). For  
45 581 DEGs found in cells expressing dCas9-BFP-DNMT3A and *uPA* gRNAs, we also performed  
46 582 integrative analyses of the expression change, promoter methylation, and promoter binding  
47 583 intensity (**Fig. 8g**). Very weak but significant correlation was identified for a few clusters of DEGs.  
48 584 Taken together, these results suggest that the non-specific alteration of transcription is not merely  
49 585 caused by promoter methylation or binding of dCas9 methyltransferase. Since *uPA* is an  
50 586 important factor in regulating cell proliferation and inhibition of cell growth was found in cells  
51 587 expressing dCas9 methyltransferases and *uPA* gRNAs (**Supplementary Fig. S12**), the large  
52 588 number of differentially expressed genes might be a result of altered cellular functions. Taken  
53 589 together, our results clearly indicate that inhibition of *uPA* and *TGFBR3* expression by dCas9  
54 590 methyltransferase and corresponding gRNAs is not merely due to *de novo* DNA methylation of  
55 591 their promoters.  
56 592  
57  
58  
59  
60  
61  
62  
63  
64  
65

1  
2  
3  
4 593 To investigate whether longer term inhibition of gene expression can be facilitated by **dCas9**  
5 594 **methyltransferases**, five HEK293T fluorescent reporter cell clones carrying different copies of a  
6 595 CMV-mCherry expression cassette (**Supplementary Fig. 13a, b**) were generated. **We quantified**  
7 596 **mCherry level by FACS for two weeks after transfection.** We observed that the number of **dCas9**  
8 597 **methyltransferase**-expressing cells peaked on day 2 and decreased gradually (**Supplementary**  
9 598 **Fig. 13c**). Maximal inhibition of mCherry levels were observed on day 5 **after** transfection  
10 599 (**Supplementary Fig. 13d-h**). Compared to other dCas9 fusion proteins, the dCas-BFP-DNMT3A  
11 600 fusion resulted in the highest and longest inhibition of mCherry expression in the reporter cells  
12 601 (four out of five clones) (**Supplementary Fig. 13d-h**). The transient and prolonged inhibition  
13 602 efficacy varied among the five cell clones. For example, clone 2, which has the lowest copy  
14 603 number of transgene, showed the highest transient and longest inhibition by dCas-BFP-DNMT3A  
15 604 (**Supplementary Fig. 13e**). However, expression of mCherry was, in all clones, not significantly  
16 605 different from the pUC19 control after two weeks, suggesting that inhibition of gene expression by  
17 606 **dCas9 methyltransferases** is not stably maintained.  
18  
19  
20  
21 607

## 22 608 **Discussion**

23 609 Since dCas9 methyltransferases are targeted to a specific genomic locus simply by a small  
24 610 gRNA, this system is more convenient than ZF- or TALE-based methyltransferases [26, 35, 36].  
25 611 Recently, Vojta *et al.* and McDonald *et al.* reported that directly fusing DNMT3A to dCas9 could  
26 612 be used to induce DNA methylation at specific loci in HEK293T cells [15, 16]. Consistent with  
27 613 that, we show that dCas9-BFP-DNMT3A can methylate CpGs flanking the gRNA binding sites in  
28 614 genomic loci, further proving the general applicability of dCas9 methyltransferases for targeted  
29 615 DNA methylation in mammalian cells. In addition, our study shows for the first time that the fusion  
30 616 of dCas9 to DNMT3B is also capable of inducing specific DNA methylation, although the  
31 617 efficiency is lower than that of DNMT3A. **Additionally**, Peter *et al.* showed that the dCas9-  
32 618 DNMT3A-DNMT3L fusion can further improve *de novo* methylation efficiency compared to  
33 619 dCas9-DNMT3A [37]. Together with the reported systems, the **dCas9 methyltransferases** system  
34 620 reported in this study further broadens the availability and applicability of CRISPR-based  
35 621 reprogramming of DNA methylation. Based on the observation that **dCas9 methyltransferases**  
36 622 can efficiently methylate the flanking CpG sites from the gRNA binding site, we have developed  
37 623 an open-source web-based gRNA designing tool for **dCas9 methyltransferase** gRNAs  
38 624 (<http://luolab.au.dk/views/gRNA.cgi>).  
39  
40  
41  
42 625

43 626 On the basis of extensive gene-specific **bisulfite pyrosequencing** and whole-genome bisulfite  
44 627 sequencing (WGBS), we identified novel off-target methylation characteristics that appear to be  
45 628 predominantly enriched in promoter, 5'UTR, CGI, and open chromatin regions. Since most of  
46 629 these genomic regions are hypomethylated in HEK293T cells, it **was expected** that the off-target  
47 630 DMRs were enriched in **such** regions. In other genomic regions, which already have **a high level**  
48 631 **of methylation**, **a further methylation by dCas9 methyltransferase is not achievable.** Open  
49 632 **chromatin regions are highly prone to off-target methylation by dCas9-methyltransferase.** Since  
50 633 **the GAPDH promoter is located a DHS region**, this explains why this region is subjected to highly  
51 634 **off-target methylation.**  
52  
53  
54 635

55 636 Our study also revealed the **gRNA-dependency of off-target methylation.** This is consistent with  
56 637 the observations of McDonald *et al.* and Vojta *et al.* [15, 16]. Additionally, we have discovered  
57 638 that even in the absence of gRNAs, expression of the dCas9-BFP-DNMT3A or dCas9-BFP-  
58 639 DNMT3B alone can cause some unspecific DNA methylation. **This gRNA-independent off-target**  
59 640 **methylation effect is even more pronounced when too many dCas9 methyltransferases, or the**  
60  
61  
62  
63  
64  
65

1  
2  
3  
4 641 DNMT3A catalytic domain, enter the nucleus. For example, increasing dCas9 methyltransferase  
5 642 expression level, fusing the catalytic domain of DNMT3A or DNMT3B directly to Cas9 without the  
6 643 BFP linker, or overexpressing the DNMT3A catalytic domain will cause increased gRNA-  
7 644 independent off-target methylation (see extended data and description in **Supplementary File 1**).  
8  
9 645

10 646 In this study, we found that expressing dCas9 methyltransferases and gRNAs could also cause  
11 647 significant demethylation of genomic regions enriched in repeated sequences. Repeated  
12 648 sequences, which make up more than half of the human genome, are generally highly  
13 649 methylated, and their dynamics, to some extent, are associated with normal development and  
14 650 tumorigenesis. A previous study of methylation in repeated sequences has shown that, with  
15 651 increasing age from adulthood, there is a global decrease in DNA methylation in repeated  
16 652 sequences and intergenic genome sequences [38]. We also observed that expression of dCas9  
17 653 methyltransferase alone or together with gRNA can inhibit HEK293T cell growth (**Supplementary**  
18 654 **Fig. 12**). The hypo-methylated DMRs could potentially be the result of inhibited cell proliferation by  
19 655 dCas9 methyltransferase and gRNAs. This should be investigated in future studies.  
20  
21 656

22 657 Improvement of dCas9 methyltransferase specificity, to minimize the gRNA-dependent and  
23 658 gRNA-independent off-target activity, is crucial for future applications of the technology.  
24 659 McDonald, et al., has observed significant reduction in off-target methylation using DOX inducible  
25 660 dCas9-DNMT3A. Consistent with these findings, we found that reducing the dCas9  
26 661 methyltransferase and gRNA expression levels, as well as lowering the dCas9 methyltransferase  
27 662 nuclear entry efficiency (**Supplementary File 1**), can reduce off-target methylation. However, this  
28 663 approach also reduced on-target methylation levels accordingly. Thus, this may not represent a  
29 664 plausible way of increasing the specificity of the system. New approaches should be developed to  
30 665 reduce off-target methylation while maintaining sufficient on-target methylation efficiencies. The  
31 666 results presented in this study highlight the importance of inclusion of extensive controls in  
32 667 subsequent experiments, such as catalytically inactive dCas9 methyltransferase mutants,  
33 668 scrambled gRNAs, and gRNA free settings. This is necessary for reliable interpretations of  
34 669 correlations between specific DNA methylation events by dCas9 methyltransferase, gene  
35 670 expression regulation and phenotypic effects.  
36  
37 671

38 672 In this study, we have observed that dCas9 methyltransferases can efficiently inhibit expression  
39 673 of genes in human cells. However, the transient inhibition of gene expression could be resulted  
40 674 from both promoter methylation and blockage of transcription by dCas9 methyltransferases. A  
41 675 previous study reported that targeted DNA methylation by a zinc finger-based methyltransferase  
42 676 is not stably maintained [39]. Our time-course experiments to study the inhibition of gene  
43 677 expression is gradually decreased during *in vitro* expansion of the transfected cells. This could be  
44 678 the result of removal of the *de novo* established epigenetic marks, dilution of the dCas9  
45 679 methyltransferase expression plasmids, and/or negative selection of the cells expressing dCas9  
46 680 methyltransferases. We also realize that DNA methylation and gene expression analyses were  
47 681 conducted in cells transiently transfected with dCas9 methyltransferase expression plasmids,  
48 682 which might lead to severe overexpression of the dCas9 methyltransferases. Thus, future studies  
49 683 could benefit from being conducted in cells stably or conditionally expressing low copy numbers  
50 684 of dCas9 methyltransferase to minimize off-target methylation. Taken together, our study is the  
51 685 first to reveal novel characteristics of the on-target and off-target DNA methylation by dCas9  
52 686 methyltransferases on a genome-wide scale with single-base resolution and highlights the need  
53 687 for development of CRISPR DNA methylation editing systems with higher specificity.  
54  
55 688



1  
2  
3  
4  
5  
6  
7  
8  
9  
10  
11  
12  
13  
14  
15  
16  
17  
18  
19  
20  
21  
22  
23  
24  
25  
26  
27  
28  
29  
30  
31  
32  
33  
34  
35  
36  
37  
38  
39  
40  
41  
42  
43  
44  
45  
46  
47  
48  
49  
50  
51  
52  
53  
54  
55  
56  
57  
58  
59  
60  
61  
62  
63  
64  
65

## 689 **Conclusions**

690 The **dCas9 methyltransferases** presented here, and other dCas9 fusion protein systems  
691 described previously [11, 12, 15, 16], provide useful tools for targeted epigenome editing.  
692 Continued improvement of the specificities of these systems and combining tools to enable  
693 simultaneous modification of multiple histones and DNA loci will enable more precise and stable  
694 regulation of gene structure and function. Such CRISPR gRNA-guided programmable epigenetic  
695 modification tools will hopefully have broad research applications to delineate the association  
696 between specific epigenetic changes, gene-expression regulation, and phenotypes.  
697

## 698 **Availability of supporting data**

699 RNA sequencing, WGBS, and ChIP-seq data are available from the publicly available repository  
700 (GEO).  
701 RNA-seq: GSE74935  
702 WGBS: GSE92310, GSE92311  
703 ChIP-seq: GSE92261  
704

## 705 **Declarations**

### 706 **Competing Interests Statement**

707 The authors declare no competing financial interests.  
708

### 709 **Author contributions**

710 L.L., L.B. and Y.L., conceived the idea.  
711 H.Y., J.W., L.B., X.X., A.L.N., and Y.L. planned and oversaw the study  
712 L.L., Y.Liu., J.H., F.X., T.F.D., T.S.P., B.H., L.Y., Q.Z., F.F., S.L., K.T.J. L.F., E.S., and Y.L.  
713 performed experiments and analyzed the data.  
714 L.L., J.H., and Y.L. prepared the figures.  
715 L.L. and Y.L. drafted the manuscript and all authors revised the manuscript.  
716

### 717 **Acknowledgements**

718 This work was partially supported by grants from Danish Research Council for Independent  
719 Research DFF-1337-00128 (Y.L.), the Sapere Aude Young Research Talent Prize DFF-1335-  
720 00763A (Y.L.), the Innovation Fund Denmark (BrainStem, Y.L.) and the Lundbeck Foundation:  
721 R173-2014-1105 (Y.L.); R151-2013-14439 (L.B.); R219-2016-1375 (L.L.) A.L.N. was supported  
722 by the Toyota-Foundation and the Lundbeck Foundation. FACS was performed with help from  
723 Charlotte Christie Petersen and Anni Skovbo at the FACS Core Facility, Aarhus University,  
724 Denmark.  
725

### 726 **Abbreviations**

727 CRISPR: Clustered Regularly Interspaced Short Palindromic Repeats  
728 Cas9: CRISPR-associated protein 9  
729 dCas9: Nuclease deficient Cas9 or dead Cas9  
730 FACS: Fluorescence-activated cell sorting  
731 WGBS: whole-genome bisulfite sequencing  
732 CGI: CpG island  
733 UTR: Untranslated region  
734 DHS: DNase I hypersensitivity sites  
735 PAM: Protospacer adjacent motif  
736 gRNA: guide RNA

1  
2  
3  
4  
5  
6  
7  
8  
9  
10  
11  
12  
13  
14  
15  
16  
17  
18  
19  
20  
21  
22  
23  
24  
25  
26  
27  
28  
29  
30  
31  
32  
33  
34  
35  
36  
37  
38  
39  
40  
41  
42  
43  
44  
45  
46  
47  
48  
49  
50  
51  
52  
53  
54  
55  
56  
57  
58  
59  
60  
61  
62  
63  
64  
65

737 ZF: zinc finger protein  
738 TALE: transcription-activator-like effectors  
739 qPCR: Quantitative PCR

1  
2  
3  
4  
5  
6  
7  
8  
9  
10  
11  
12  
13  
14  
15  
16  
17  
18  
19  
20  
21  
22  
23  
24  
25  
26  
27  
28  
29  
30  
31  
32  
33  
34  
35  
36  
37  
38  
39  
40  
41  
42  
43  
44  
45  
46  
47  
48  
49  
50  
51  
52  
53  
54  
55  
56  
57  
58  
59  
60  
61  
62  
63  
64  
65

740 **Reference:**

741 1. Jinek M, Chylinski K, Fonfara I, Hauer M, Doudna JA, Charpentier E: **A**  
742 **programmable dual-RNA-guided DNA endonuclease in adaptive**  
743 **bacterial immunity.** *Science* 2012, **337**:816-821.

744 2. Mali P, Yang L, Esvelt KM, Aach J, Guell M, Dicarlo JE, Norville JE, Church GM:  
745 **RNA-Guided Human Genome Engineering via Cas9.** *Science* 2013.

746 3. Jinek M, East A, Cheng A, Lin S, Ma E, Doudna J: **RNA-programmed genome**  
747 **editing in human cells.** *elife* 2013, **2**:e00471.

748 4. Cong L, Ran FA, Cox D, Lin S, Barretto R, Habib N, Hsu PD, Wu X, Jiang W,  
749 Marraffini LA, Zhang F: **Multiplex genome engineering using CRISPR/Cas**  
750 **systems.** *Science* 2013, **339**:819-823.

751 5. Johan Vad-Nielsen LL, Lars Bolund, Anders Lade Nielsen, Yonglun Luo  
752 **Golden-Gate assembly of CRISPR gRNA Expression Array for**  
753 **Simultaneously Targeting Multiple Genes.** *Cell Mol Life Sci* 2016.

754 6. Qi LS, Larson MH, Gilbert LA, Doudna JA, Weissman JS, Arkin AP, Lim WA:  
755 **Repurposing CRISPR as an RNA-Guided Platform for Sequence-Specific**  
756 **Control of Gene Expression.** *Cell* 2013, **152**:1173-1183.

757 7. Cheng AW, Wang H, Yang H, Shi L, Katz Y, Theunissen TW, Rangarajan S,  
758 Shivalila CS, Dadon DB, Jaenisch R: **Multiplexed activation of endogenous**  
759 **genes by CRISPR-on, an RNA-guided transcriptional activator system.**  
760 *Cell Res* 2013, **23**:1163-1171.

761 8. Gilbert LA, Larson MH, Morsut L, Liu Z, Brar GA, Torres SE, Stern-Ginossar N,  
762 Brandman O, Whitehead EH, Doudna JA, et al: **CRISPR-mediated modular**  
763 **RNA-guided regulation of transcription in eukaryotes.** *Cell* 2013,  
764 **154**:442-451.

765 9. Fujita T, Fujii H: **Efficient isolation of specific genomic regions and**  
766 **identification of associated proteins by engineered DNA-binding**  
767 **molecule-mediated chromatin immunoprecipitation (enChIP) using**  
768 **CRISPR.** *Biochem Biophys Res Commun* 2013, **439**:132-136.

769 10. Chen B, Gilbert LA, Cimini BA, Schnitzbauer J, Zhang W, Li GW, Park J,  
770 Blackburn EH, Weissman JS, Qi LS, Huang B: **Dynamic imaging of genomic**  
771 **loci in living human cells by an optimized CRISPR/Cas system.** *Cell* 2013,  
772 **155**:1479-1491.

773 11. Kearns NA, Pham H, Tabak B, Genga RM, Silverstein NJ, Garber M, Maehr R:  
774 **Functional annotation of native enhancers with a Cas9-histone**  
775 **demethylase fusion.** *Nat Methods* 2015, **12**:401-403.

776 12. Hilton IB, D'Ippolito AM, Vockley CM, Thakore PI, Crawford GE, Reddy TE,  
777 Gersbach CA: **Epigenome editing by a CRISPR-Cas9-based**  
778 **acetyltransferase activates genes from promoters and enhancers.** *Nat*  
779 *Biotechnol* 2015, **33**:510-517.

780 13. Jones PA, Baylin SB: **The fundamental role of epigenetic events in cancer.**  
781 *Nat Rev Genet* 2002, **3**:415-428.

782 14. Brena RM, Costello JF: **Genome-epigenome interactions in cancer.** *Hum*  
783 *Mol Genet* 2007, **16 Spec No 1**:R96-105.

1  
2  
3  
4  
5  
6  
7  
8  
9  
10  
11  
12  
13  
14  
15  
16  
17  
18  
19  
20  
21  
22  
23  
24  
25  
26  
27  
28  
29  
30  
31  
32  
33  
34  
35  
36  
37  
38  
39  
40  
41  
42  
43  
44  
45  
46  
47  
48  
49  
50  
51  
52  
53  
54  
55  
56  
57  
58  
59  
60  
61  
62  
63  
64  
65

784 15. Vojta A, Dobrinic P, Tadic V, Bockor L, Korac P, Julg B, Klasic M, Zoldos V:  
785 **Repurposing the CRISPR-Cas9 system for targeted DNA methylation.**  
786 *Nucleic Acids Res* 2016.

787 16. McDonald JI, Celik H, Rois LE, Fishberger G, Fowler T, Rees R, Kramer A,  
788 Martens A, Edwards JR, Challen GA: **Reprogrammable CRISPR/Cas9-based**  
789 **system for inducing site-specific DNA methylation.** *Biol Open* 2016, **5**:866-  
790 874.

791 17. Livak KJ, Schmittgen TD: **Analysis of relative gene expression data using**  
792 **real-time quantitative PCR and the 2(-Delta Delta C(T)) Method.** *Methods*  
793 2001, **25**:402-408.

794 18. Rohde C, Zhang Y, Reinhardt R, Jeltsch A: **BISMA--fast and accurate**  
795 **bisulfite sequencing data analysis of individual clones from unique and**  
796 **repetitive sequences.** *BMC Bioinformatics* 2010, **11**:230.

797 19. Wagner GP, Kin K, Lynch VJ: **Measurement of mRNA abundance using**  
798 **RNA-seq data: RPKM measure is inconsistent among samples.** *Theory*  
799 *Biosci* 2012, **131**:281-285.

800 20. Xi Y, Li W: **BSMAP: whole genome bisulfite sequence MAPping program.**  
801 *BMC Bioinformatics* 2009, **10**:232.

802 21. Law JA, Jacobsen SE: **Establishing, maintaining and modifying DNA**  
803 **methylation patterns in plants and animals.** *Nat Rev Genet* 2010, **11**:204-  
804 220.

805 22. Pakneshan P, Szyf M, Farias-Eisner R, Rabbani SA: **Reversal of the**  
806 **hypomethylation status of urokinase (uPA) promoter blocks breast**  
807 **cancer growth and metastasis.** *J Biol Chem* 2004, **279**:31735-31744.

808 23. Gowher H, Jeltsch A: **Molecular enzymology of the catalytic domains of**  
809 **the Dnmt3a and Dnmt3b DNA methyltransferases.** *J Biol Chem* 2002,  
810 **277**:20409-20414.

811 24. Margot JB, Aguirre-Arteta AM, Di Giacco BV, Pradhan S, Roberts RJ, Cardoso  
812 MC, Leonhardt H: **Structure and function of the mouse DNA**  
813 **methyltransferase gene: Dnmt1 shows a tripartite structure.** *J Mol Biol*  
814 2000, **297**:293-300.

815 25. Fu Y, Foden JA, Khayter C, Maeder ML, Reyon D, Joung JK, Sander JD: **High-**  
816 **frequency off-target mutagenesis induced by CRISPR-Cas nucleases in**  
817 **human cells.** *Nat Biotechnol* 2013.

818 26. Rivenbark AG, Stolzenburg S, Beltran AS, Yuan X, Rots MG, Strahl BD,  
819 Blancafort P: **Epigenetic reprogramming of cancer cells via targeted DNA**  
820 **methylation.** *Epigenetics* 2012, **7**:350-360.

821 27. Yang AS, Estecio MR, Doshi K, Kondo Y, Tajara EH, Issa JP: **A simple method**  
822 **for estimating global DNA methylation using bisulfite PCR of repetitive**  
823 **DNA elements.** *Nucleic Acids Res* 2004, **32**:e38.

824 28. Landan G, Cohen NM, Mukamel Z, Bar A, Molchadsky A, Brosh R, Horn-Saban  
825 S, Zalcenstein DA, Goldfinger N, Zundelovich A, et al: **Epigenetic**  
826 **polymorphism and the stochastic formation of differentially methylated**  
827 **regions in normal and cancerous tissues.** *Nat Genet* 2012, **44**:1207-1214.

1  
2  
3  
4  
5  
6  
7  
8  
9  
10  
11  
12  
13  
14  
15  
16  
17  
18  
19  
20  
21  
22  
23  
24  
25  
26  
27  
28  
29  
30  
31  
32  
33  
34  
35  
36  
37  
38  
39  
40  
41  
42  
43  
44  
45  
46  
47  
48  
49  
50  
51  
52  
53  
54  
55  
56  
57  
58  
59  
60  
61  
62  
63  
64  
65

828 29. Wu H, Xu T, Feng H, Chen L, Li B, Yao B, Qin Z, Jin P, Conneely KN: **Detection**  
829 **of differentially methylated regions from whole-genome bisulfite**  
830 **sequencing data without replicates.** *Nucleic Acids Res* 2015, **43**:e141.

831 30. Kuscu C, Arslan S, Singh R, Thorpe J, Adli M: **Genome-wide analysis reveals**  
832 **characteristics of off-target sites bound by the Cas9 endonuclease.** *Nat*  
833 *Biotechnol* 2014, **32**:677-683.

834 31. Wu X, Scott DA, Kriz AJ, Chiu AC, Hsu PD, Dadon DB, Cheng AW, Trevino AE,  
835 Konermann S, Chen S, et al: **Genome-wide binding of the CRISPR**  
836 **endonuclease Cas9 in mammalian cells.** *Nat Biotechnol* 2014, **32**:670-676.

837 32. Jensen KT, Floe L, Petersen TS, Huang J, Xu F, Bolund L, Luo Y, Lin L:  
838 **Chromatin accessibility and guide sequence secondary structure affect**  
839 **CRISPR-Cas9 gene editing efficiency.** *FEBS Lett* 2017.

840 33. Bailey TL, Elkan C: **Fitting a mixture model by expectation maximization**  
841 **to discover motifs in biopolymers.** *Proc Int Conf Intell Syst Mol Biol* 1994,  
842 **2**:28-36.

843 34. Liu XS, Wu H, Ji X, Stelzer Y, Wu X, Czauderna S, Shu J, Dadon D, Young RA,  
844 Jaenisch R: **Editing DNA Methylation in the Mammalian Genome.** *Cell*  
845 2016, **167**:233-247 e217.

846 35. Bernstein DL, Le Lay JE, Ruano EG, Kaestner KH: **TALE-mediated epigenetic**  
847 **suppression of CDKN2A increases replication in human fibroblasts.** *J*  
848 *Clin Invest* 2015, **125**:1998-2006.

849 36. Meister GE, Chandrasegaran S, Ostermeier M: **Heterodimeric DNA**  
850 **methyltransferases as a platform for creating designer zinc finger**  
851 **methyltransferases for targeted DNA methylation in cells.** *Nucleic Acids*  
852 *Res* 2010, **38**:1749-1759.

853 37. Stepper P, Kungulovski G, Jurkowska RZ, Chandra T, Krueger F, Reinhardt R,  
854 Reik W, Jeltsch A, Jurkowski TP: **Efficient targeted DNA methylation with**  
855 **chimeric dCas9-Dnmt3a-Dnmt3L methyltransferase.** *Nucleic Acids Res*  
856 2016.

857 38. Suelves M, Carrio E, Nunez-Alvarez Y, Peinado MA: **DNA methylation**  
858 **dynamics in cellular commitment and differentiation.** *Brief Funct*  
859 *Genomics* 2016, **15**:443-453.

860 39. Kungulovski G, Nunna S, Thomas M, Zanger UM, Reinhardt R, Jeltsch A:  
861 **Targeted epigenome editing of an endogenous locus with chromatin**  
862 **modifiers is not stably maintained.** *Epigenetics Chromatin* 2015, **8**:12.

866 **Figure captions**

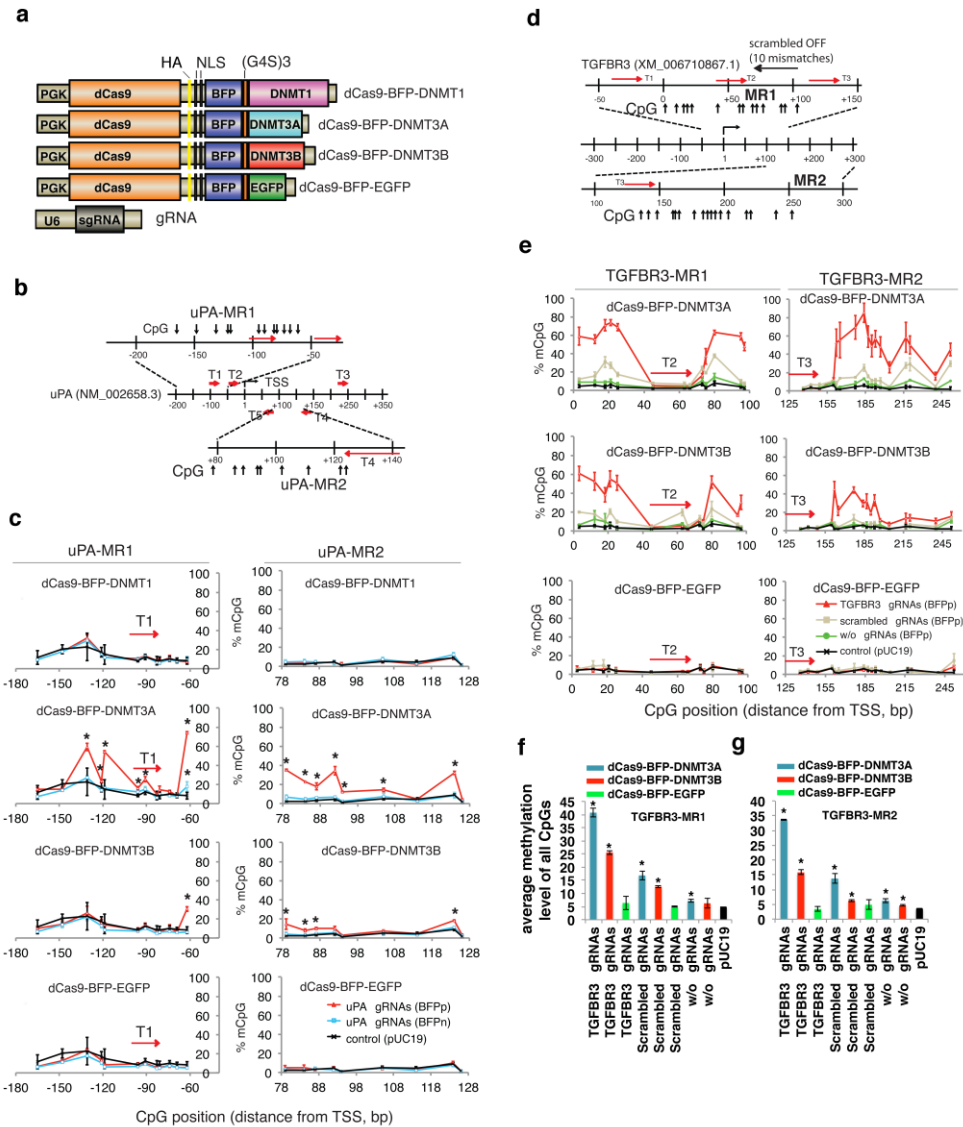

867  
868 **Fig. 1 De novo uPA and TGFBR3 methylation by RNA-guided dCas9 methyltransferases**

869 (a) Schematic illustration of the dCas9 methyltransferase expression vectors. PGK: phosphoglycerate kinase promoter; G4S: GGGGS linker; NLS: nuclear localization signal; U6: human U6 promoter.

870  
871  
872 (b) Schematic illustration of the uPA promoter and gRNA target sites (T1-T5), two uPA methylated regions (uPA-MR1, uPA-MR2) and CpGs analyzed by bisulfite pyrosequencing. TSS: Transcription start site. Numbers indicate distances in base pairs from TSS.

873  
874  
875 (c) Line plots of the percentage of methylated CpGs (mCpG). Red line: the BFP positive cells (BFPp). Light blue line: BFP negative cells (BFPn). Note that %mCpG in control cells transfected with pUC19 has been re-plotted as a reference (black line). BFPn cells include cells expressing very low level of dCas9 methyltransferase. Each data point represents mean  $\pm$  SD (n = 2-4). Asterisk (\*) indicates statistical significance (p < 0.05) compared to the control after Bonferroni correction.

1  
2  
3  
4  
5  
6  
7  
8  
9  
10  
11  
12  
13  
14  
15  
16  
17  
18  
19  
20  
21  
22  
23  
24  
25  
26  
27  
28  
29  
30  
31  
32  
33  
34  
35  
36  
37  
38  
39  
40  
41  
42  
43  
44  
45  
46  
47  
48  
49  
50  
51  
52  
53  
54  
55  
56  
57  
58  
59  
60  
61  
62  
63  
64  
65

881 (d) Schematic illustration of the human *TGFBR3* promoter locus, *TGFBR3* gRNA binding sites  
882 (red arrows), potential off-target binding sites (black horizontal arrows) of the scrambled gRNA,  
883 and CpG sites.  
884 (e) Line plots of % mCpG at the *TGFBR3* promoter in cells expressing dCas9 methyltransferase  
885 with (red line) or without (green line) *TGFBR3* gRNAs, or with the scrambled gRNAs (gray line).  
886 Note that %mCpG in control cells transfected with pUC19 has been re-plotted as a reference  
887 (black line). Each data point represents mean  $\pm$  SD (n = 2-5).  
888 (f-g) Bar chart of average methylation levels for TGFBR3-MR1 (f) and TGFBR3-MR2 (g) CpG  
889 sites. Values represent mean  $\pm$  SD (n = 3). Asterisk (\*) represents P value < 0.05 compared to  
890 pUC19 (ANOVA).  
891  
892

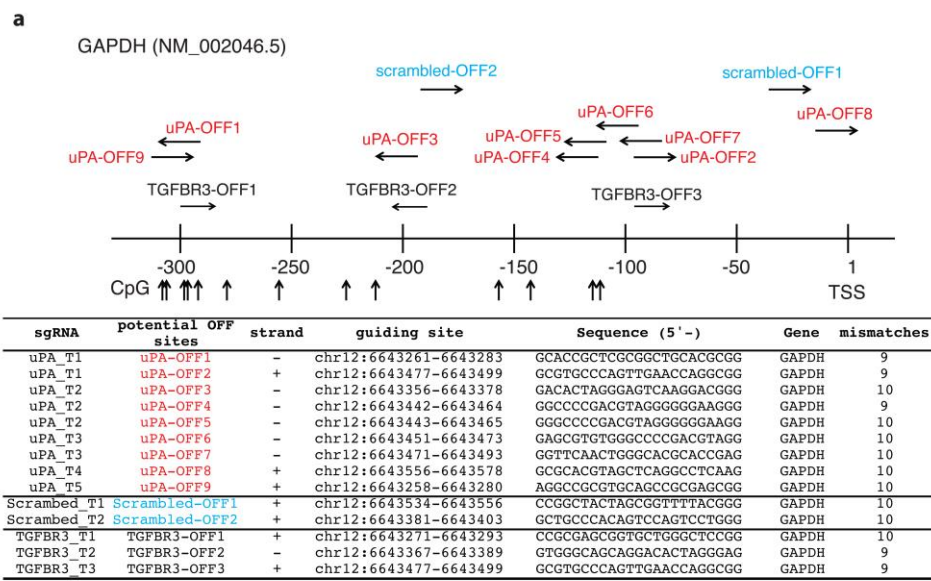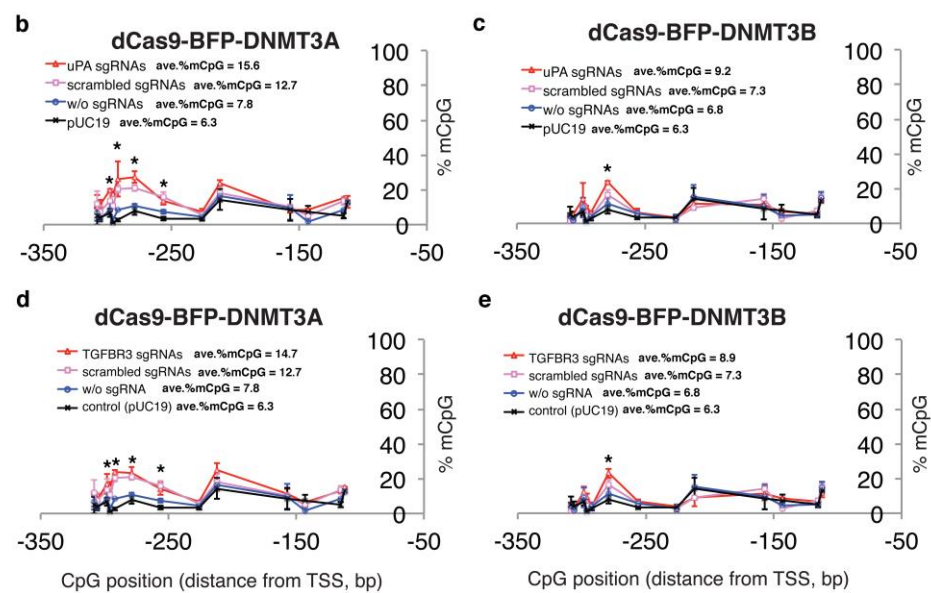

893  
894 **Fig. 2 Off-target methylation of GAPDH promoter by dCas9 methyltransferases and gRNAs**



1  
2  
3  
4  
5  
6  
7  
8  
9  
10  
11  
12  
13  
14  
15  
16  
17  
18  
19  
20  
21  
22  
23  
24  
25  
26  
27  
28  
29  
30  
31  
32  
33  
34  
35  
36  
37  
38  
39  
40  
41  
42  
43  
44  
45  
46  
47  
48  
49  
50  
51  
52  
53  
54  
55  
56  
57  
58  
59  
60  
61  
62  
63  
64  
65

895 (a) Schematic illustration of the *GAPDH* promoter. Potential off target sites and CpGs analyzed  
896 by bisulfite pyrosequencing are indicated. Sequences of potential off-target binding sites by *uPA*,  
897 *TGFBR3* and scrambled gRNAs with maximum 10 mismatches are listed.

898 (b-d) Line plots of *GAPDH* promoter methylation in FACS-sorted HEK293T cells 48 hours after  
899 transfection with *dCas9 methyltransferases* and gRNAs. The methylation profiles from the  
900 pUC19-transfected samples were re-plotted as reference. Each data point in the graph  
901 represents the mean  $\pm$  SD (n = 2 independent transfections). Average methylation levels for all  
902 CpGs analyzed are presented next to line legends. Asterisks (\*) represent P value < 0.05  
903 compared to pUC19 (ANOVA).

904  
905  
906

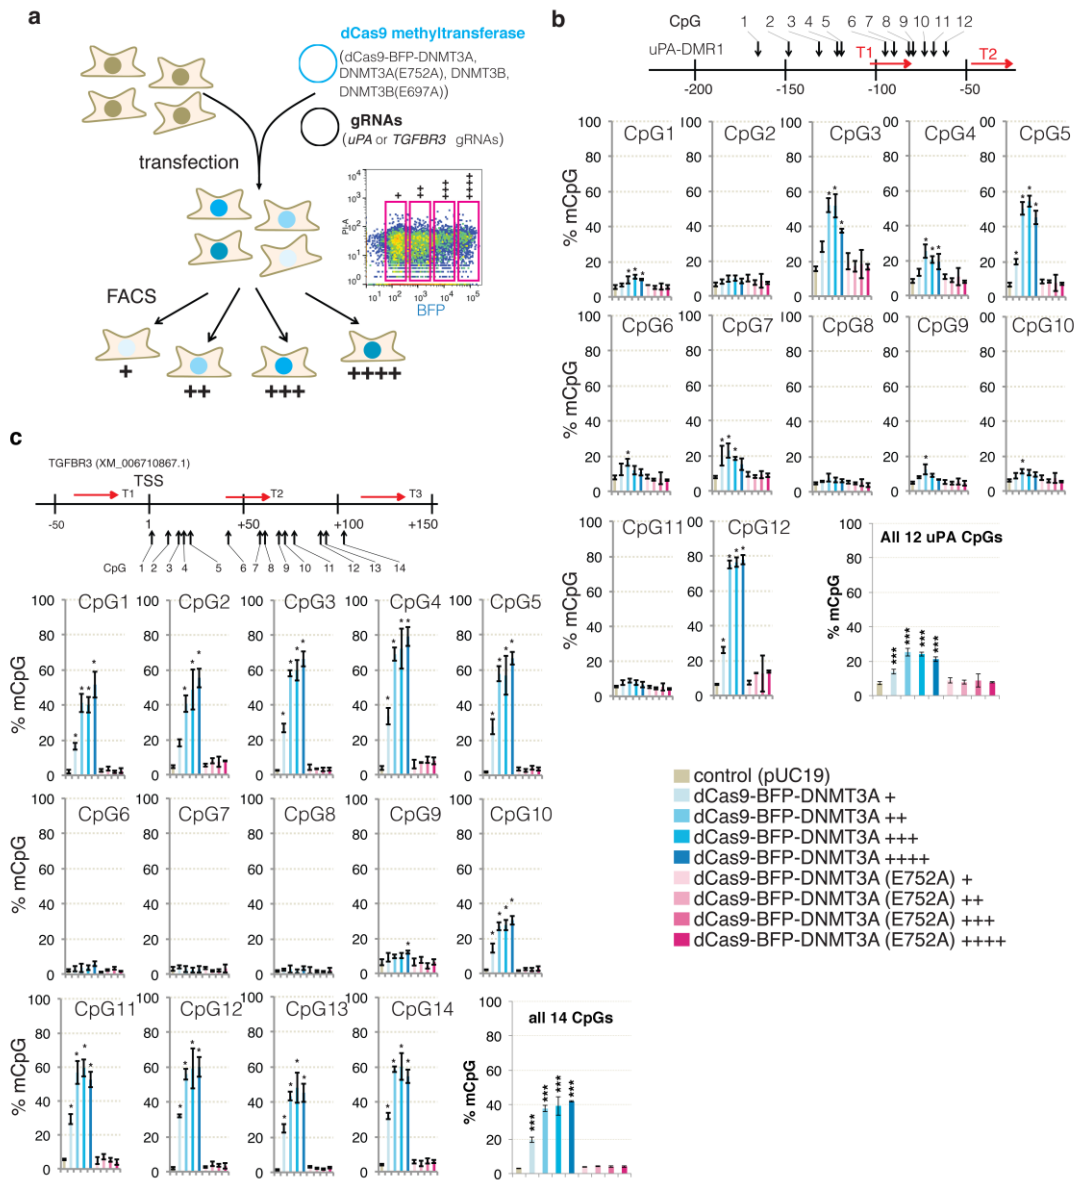

**Fig. 3 On-target methylation by dCas9 methyltransferases**

(a) Schematic illustration of the experiment. dCas9 methyltransferase-expressing cells were enriched by FACS 48 hours after transfection and sorted according to the BFP signal: +, ++, +, +, +. Right: Representative FACS plot and gating.

(b-c) Bar charts indicating % mCpG for individual CpG and average values of all CpG sites in the *uPA* (b) and *TGFBR3* (c) target regions. The schematic illustrations above the bar graphs show gRNA binding sites and CpG sites analyzed. Value represents mean  $\pm$  SD ( $n = 3$ ). Asterisk (\*) indicates statistical significance ( $p < 0.05$ , ANOVA) compared to the control after Bonferroni correction. Figure legend for bar graphs in (b) and (c) is presented at bottom-right.

1  
2  
3  
4  
5  
6  
7  
8  
9  
10  
11  
12  
13  
14  
15  
16  
17  
18  
19  
20  
21  
22  
23  
24  
25  
26  
27  
28  
29  
30  
31  
32  
33  
34  
35  
36  
37  
38  
39  
40  
41  
42  
43  
44  
45  
46  
47  
48  
49  
50  
51  
52  
53  
54  
55  
56  
57  
58  
59  
60  
61  
62  
63  
64  
65

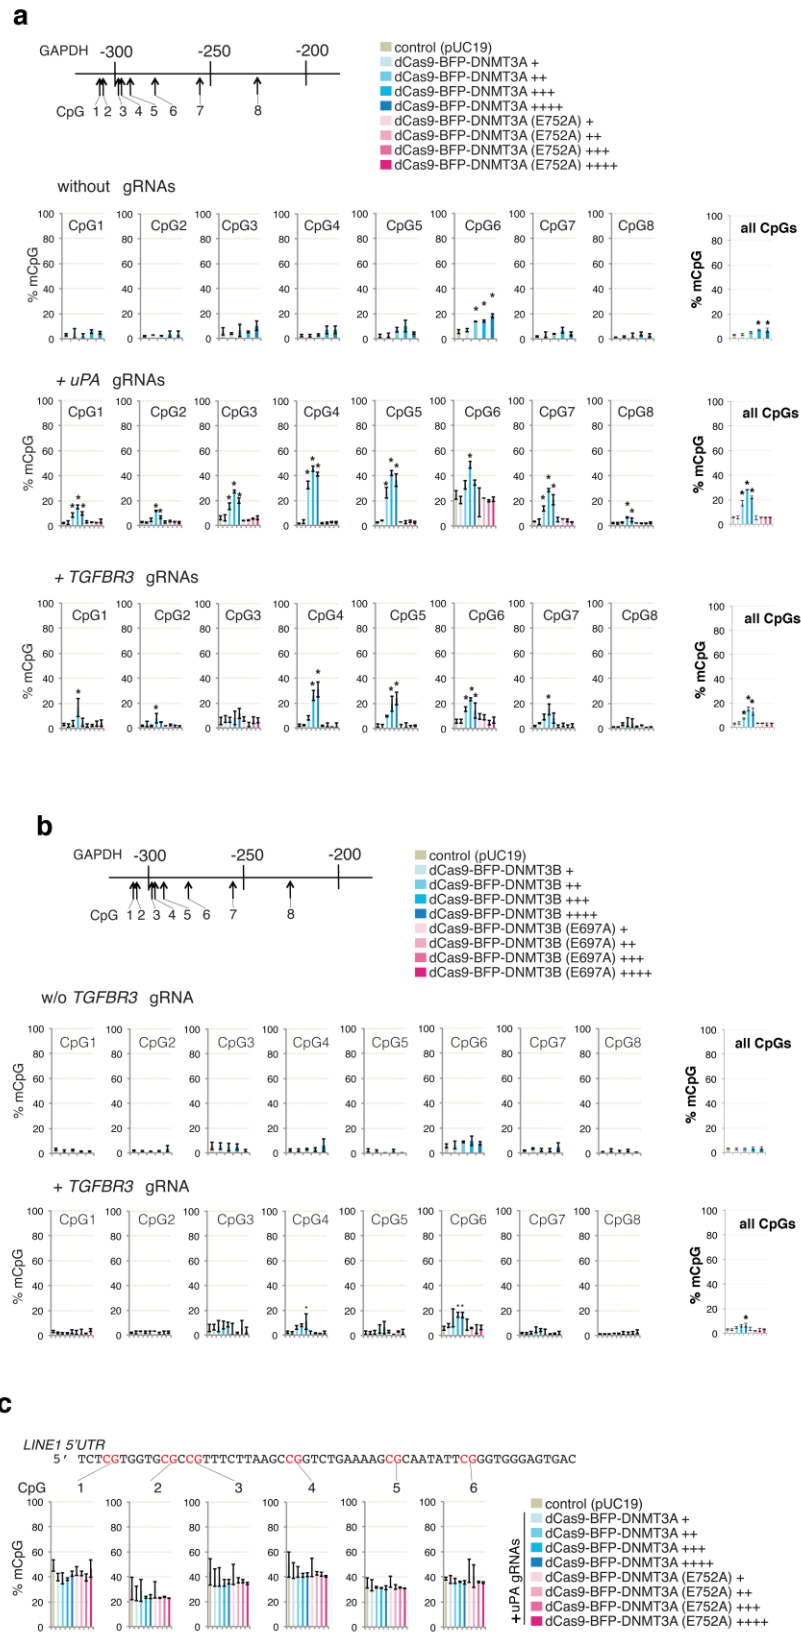

1  
2  
3  
4  
5  
6  
7  
8  
9  
10  
11  
12  
13  
14  
15  
16  
17  
18  
19  
20  
21  
22  
23  
24  
25  
26  
27  
28  
29  
30  
31  
32  
33  
34  
35  
36  
37  
38  
39  
40  
41  
42  
43  
44  
45  
46  
47  
48  
49  
50  
51  
52  
53  
54  
55  
56  
57  
58  
59  
60  
61  
62  
63  
64  
65

**Fig. 4 Off-target methylation by dCas9 methyltransferases**

**(a)** Bar charts indicating % mCpG at individual CpGs and total % mCpG (8 CpG sites) for the *GAPDH* promoter in cells expressing different levels (BFP signal: +, ++, +++, +++) of dCas9-BFP-DNMT3A or dCas9-BFP-DNMT3A(E752A) alone or together with either *uPA* or *TGFBR3* gRNAs.

**(b)** Bar charts indicating % mCpG in the *GAPDH* promote in cells expressing different levels (BFP signal: +, ++, +++, +++) of dCas9-BFP-DNMT3B or dCas9-BFP-DNMT3B(E697A) alone or with *TGFBR3* gRNAs.

**(c)** *LINE1* 5'UTR methylation in cells expressing *uPA* gRNAs with different levels of either dCas9-BFP-DNMT3A or dCas9-BFP-DNMT3A(E752A). Cells transfected with pUC19 were used as controls. Values represent mean  $\pm$  SD (n = 3). Asterisks (\*) represent P value < 0.05 (ANOVA) compared to pUC19.

1  
2  
3  
4  
5  
6  
7  
8  
9  
10  
11  
12  
13  
14  
15  
16  
17  
18  
19  
20  
21  
22  
23  
24  
25  
26  
27  
28  
29  
30  
31  
32  
33  
34  
35  
36  
37  
38  
39  
40  
41  
42  
43  
44  
45  
46  
47  
48  
49  
50  
51  
52  
53  
54  
55  
56  
57  
58  
59  
60  
61  
62  
63  
64  
65

**Fig. 5**

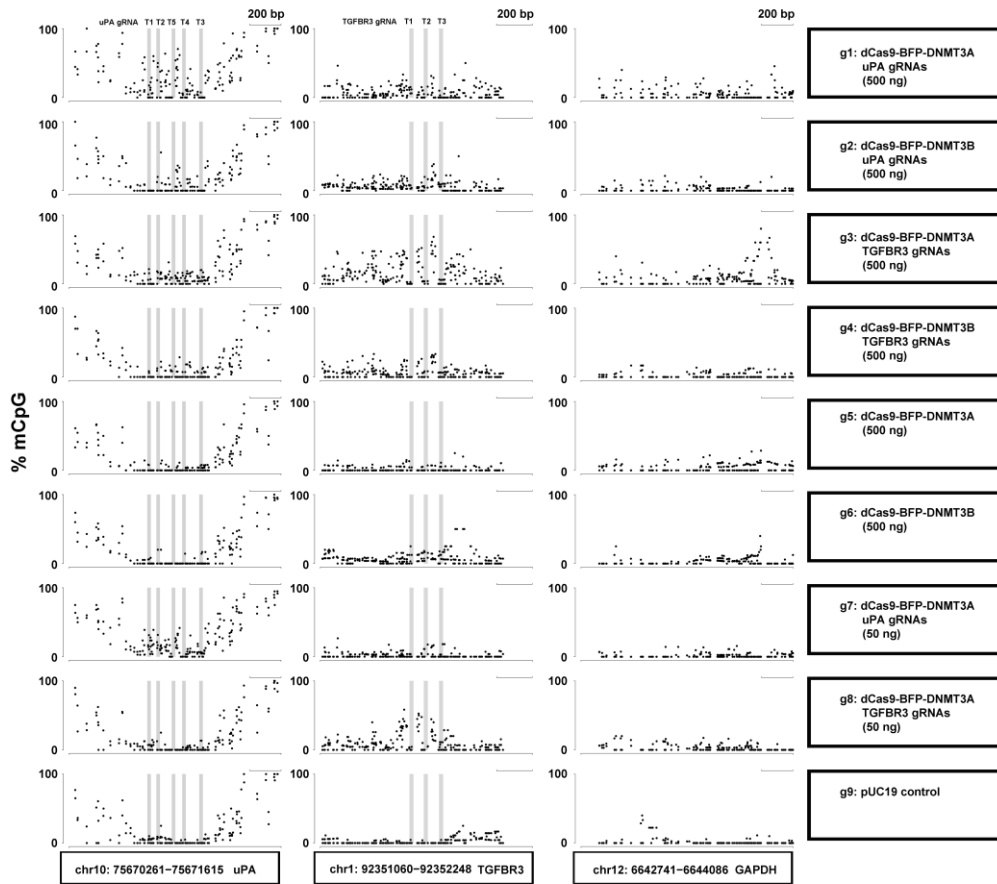

934  
935 **Fig. 5 De novo methylation of *uPA*, *TGFBR3* and *GAPDH* promoters by dCas9**  
936 **methyltransferase measured with WGBS. Dot plots of % mCpG for individual CpG sites in the**

1  
2  
3  
4  
5  
6  
7  
8  
9  
10  
11  
12  
13  
14  
15  
16  
17  
18  
19  
20  
21  
22  
23  
24  
25  
26  
27  
28  
29  
30  
31  
32  
33  
34  
35  
36  
37  
38  
39  
40  
41  
42  
43  
44  
45  
46  
47  
48  
49  
50  
51  
52  
53  
54  
55  
56  
57  
58  
59  
60  
61  
62  
63  
64  
65

937 *uPA*, *TGFBR3* and *GAPDH* promoter regions. Each dot represents one CpG site. Right panel  
938 indicates the transfected plasmids. mCpG levels were quantified by WGBS. Scale bar, 200 bp.  
939  
940

1  
2  
3  
4  
5  
6  
7  
8  
9  
10  
11  
12  
13  
14  
15  
16  
17  
18  
19  
20  
21  
22  
23  
24  
25  
26  
27  
28  
29  
30  
31  
32  
33  
34  
35  
36  
37  
38  
39  
40  
41  
42  
43  
44  
45  
46  
47  
48  
49  
50  
51  
52  
53  
54  
55  
56  
57  
58  
59  
60  
61  
62  
63  
64  
65

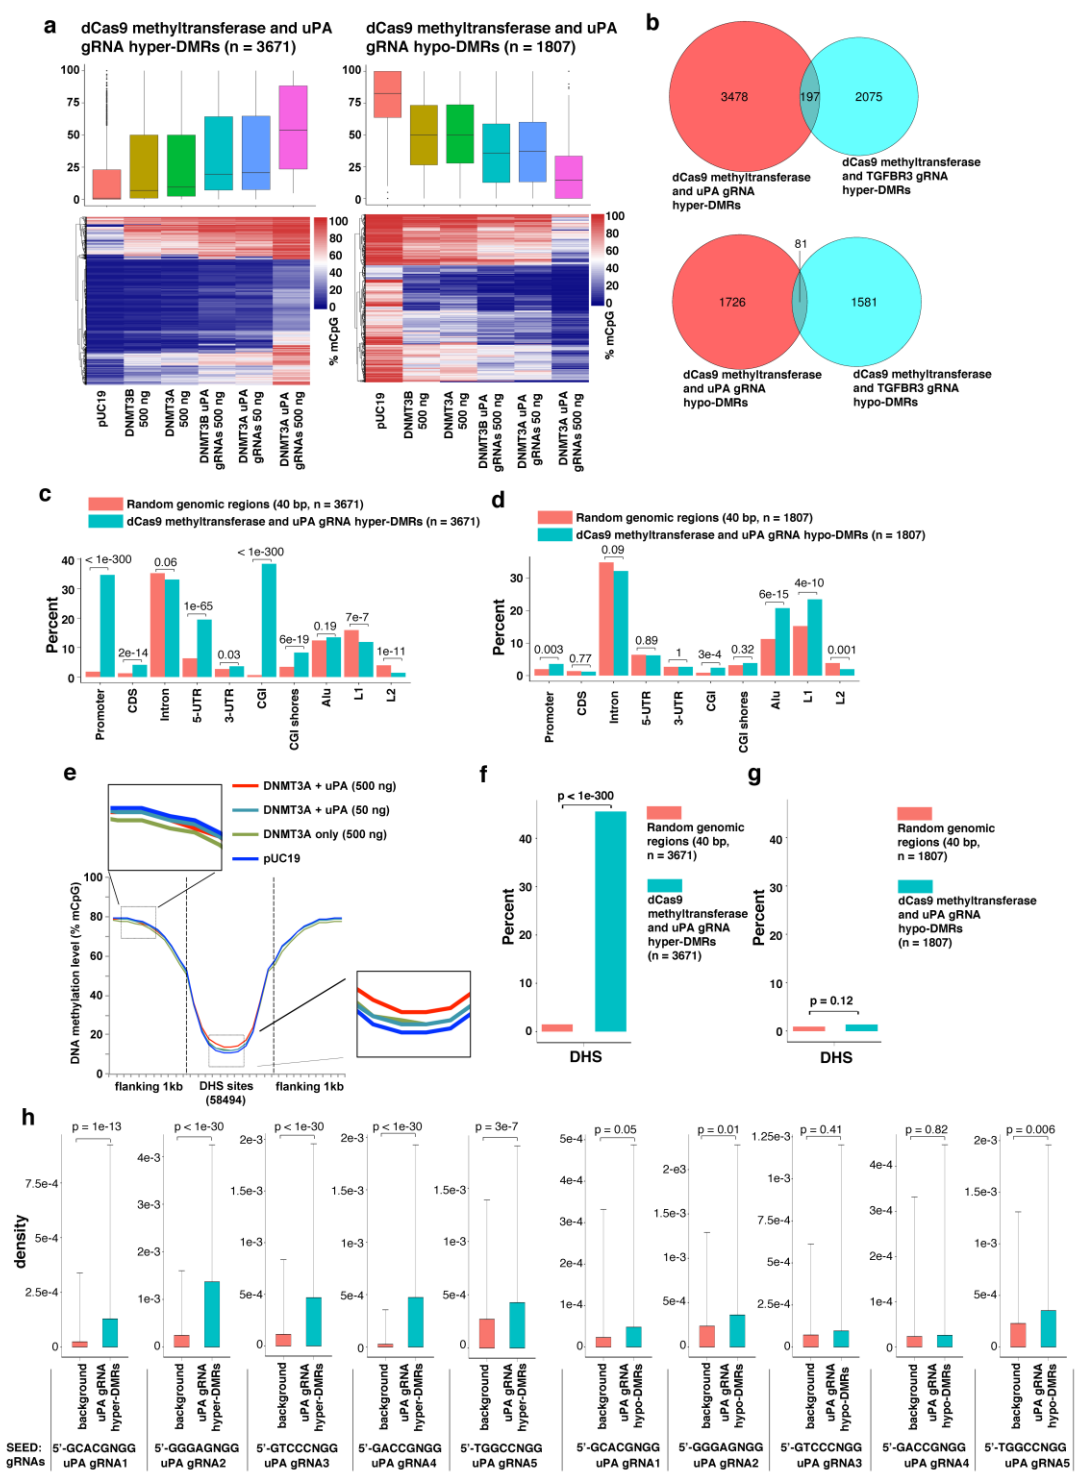

941  
942  
943

Fig. 6 Genomic characteristics of off-target DMRs caused by dCas9 methyltransferases and uPA gRNAs

1  
2  
3  
4  
5  
6  
7  
8  
9  
10  
11  
12  
13  
14  
15  
16  
17  
18  
19  
20  
21  
22  
23  
24  
25  
26  
27  
28  
29  
30  
31  
32  
33  
34  
35  
36  
37  
38  
39  
40  
41  
42  
43  
44  
45  
46  
47  
48  
49  
50  
51  
52  
53  
54  
55  
56  
57  
58  
59  
60  
61  
62  
63  
64  
65

944 (a) Box plot (top) and heatmap clustering (bottom) of the hypermethylated (left) and  
945 hypomethylated (right) DMRs resulting from dCas9 methyltransferases and *uPA* gRNAs.  
946 (b) Venn diagram presentation of hypermethylated (top) or hypomethylated (bottom) DMRs  
947 caused by dCas9 methyltransferases and *uPA* gRNAs compared to *TGFBR3* gRNAs.  
948 (c-d) Bar chart illustrating the percentage of the identified uPA hypermethylated (c) or  
949 hypomethylated (d) DMRs that fall into the different types of genomic regions indicated.  
950 Background represents a random sample of the same number of similar sized genomic windows  
951 that fall into the categories indicated. Values above bars are P values between background and  
952 uPA-DMRs (Fisher's exact test).  
953 (e) Metaplot of average CpG methylation levels in 58,494 DNase I hypersensitive sites (DHS) and  
954 1 kb upstream and downstream flanking regions.  
955 (f-g) Bar chart of % uPA hypermethylated (f) or hypomethylated (g) DMRs falling into DHS core  
956 regions.  
957 (h) Density of 5nt-SEED-NGG for uPA gRNAs (T1 to T5) in background genomic windows and  
958 uPA DMRs + flanking 100 bp. Values represent median density with one standard deviation. P  
959 values (t-test) are given above the bar charts.



1  
2  
3  
4  
5  
6  
7  
8  
9  
10  
11  
12  
13  
14  
15  
16  
17  
18  
19  
20  
21  
22  
23  
24  
25  
26  
27  
28  
29  
30  
31  
32  
33  
34  
35  
36  
37  
38  
39  
40  
41  
42  
43  
44  
45  
46  
47  
48  
49  
50  
51  
52  
53  
54  
55  
56  
57  
58  
59  
60  
61  
62  
63  
64  
65

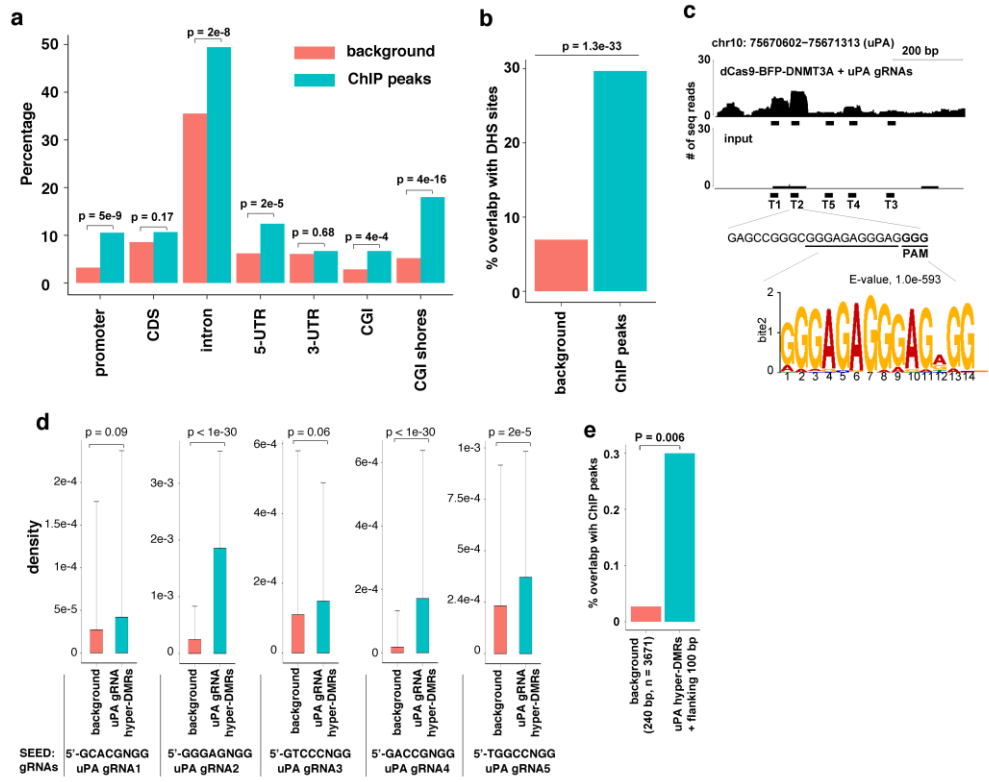

962  
963  
964

**Fig. 7 Correlation between dCas9-BFP-DNMT3A off-target binding and off-target methylation**

1  
2  
3  
4  
5  
6  
7  
8  
9  
10  
11  
12  
13  
14  
15  
16  
17  
18  
19  
20  
21  
22  
23  
24  
25  
26  
27  
28  
29  
30  
31  
32  
33  
34  
35  
36  
37  
38  
39  
40  
41  
42  
43  
44  
45  
46  
47  
48  
49  
50  
51  
52  
53  
54  
55  
56  
57  
58  
59  
60  
61  
62  
63  
64  
65

965 (a) Bar chart illustrating the percentage of ChIP peaks from cells expressing dCas9-BFP-  
966 DNMT3A and uPA gRNAs or background control regions (random sampling of the same number  
967 of similar sized genomic windows as the ChIP peaks) falling into the different types of genomic  
968 regions indicated. P-values between background and ChIP peaks indicated above bars, Fisher's  
969 exact test.

970 (b) Bar chart of % ChIP-peaks falling into DHS core regions.

971 (c) Representative plot of ChIP-seq reads in the *uPA* promoter, uPA gRNA T2 sequences, and  
972 the top motif identified by MEME-ChIP.

973 (d) Density of 5nt-SEED-NGG for uPA gRNAs (T1 to T5) ChIP peaks. Background is a random  
974 sample of the same number of similar sized genomic windows as ChIP peaks. Values represent  
975 median density with one standard deviation. P values are given for the indicated comparisons (t-  
976 test).

977 (e) Bar plot of % ChIP peaks overlapping with hypermethylated DMRs caused by dCas9  
978 methyltransferase and *uPA* gRNAs. Background is a random sample of the same number of  
979 similar sized genomic windows as DMRs.

980  
981

1  
2  
3  
4  
5  
6  
7  
8  
9  
10  
11  
12  
13  
14  
15  
16  
17  
18  
19  
20  
21  
22  
23  
24  
25  
26  
27  
28  
29  
30  
31  
32  
33  
34  
35  
36  
37  
38  
39  
40  
41  
42  
43  
44  
45  
46  
47  
48  
49  
50  
51  
52  
53  
54  
55  
56  
57  
58  
59  
60  
61  
62  
63  
64  
65

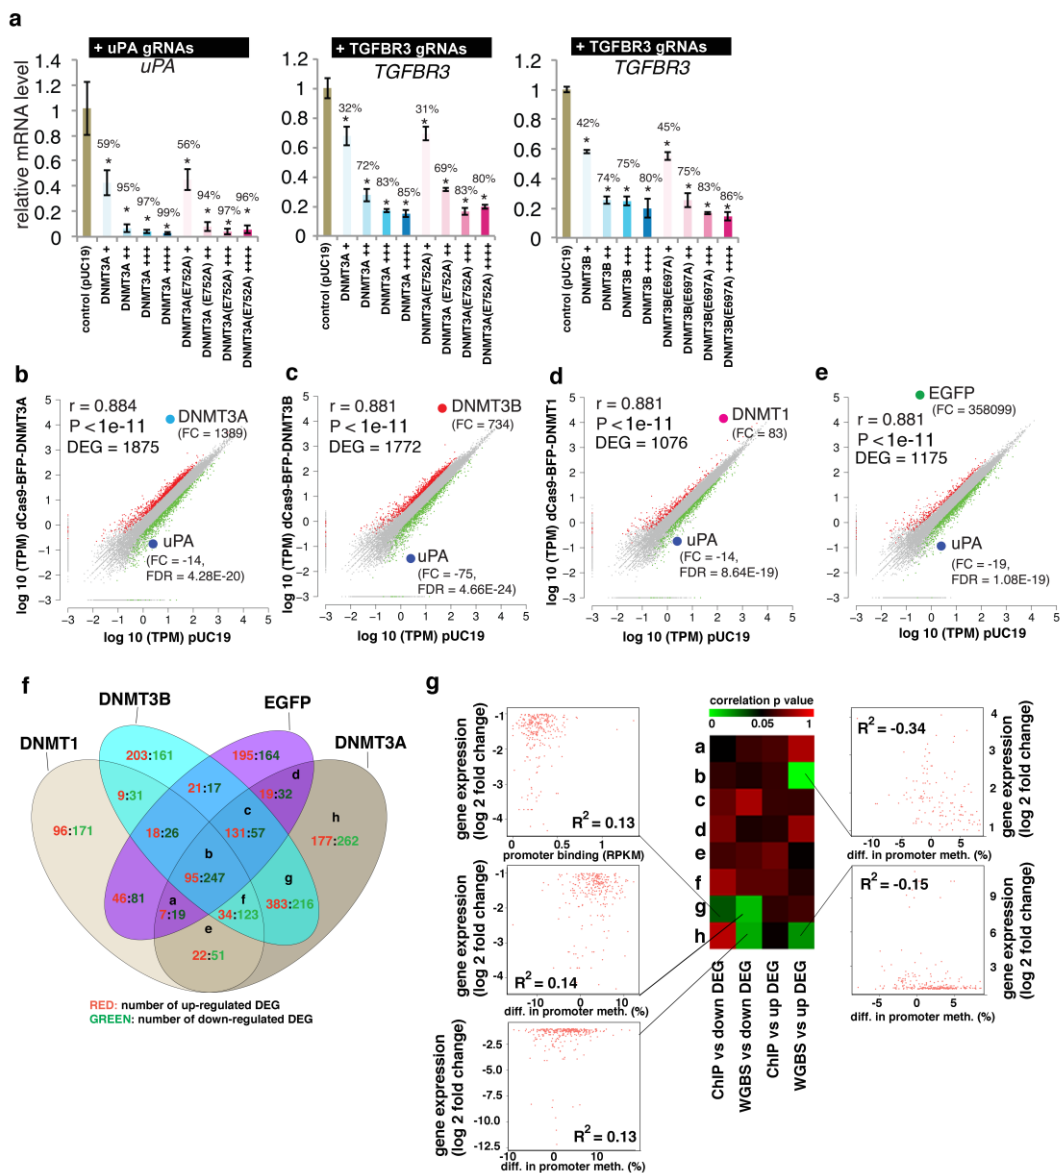

982  
983

Fig. 8 Effect of dCas9 methyltransferases on gene expression

1  
2  
3  
4  
5  
6  
7  
8  
9  
10  
11  
12  
13  
14  
15  
16  
17  
18  
19  
20  
21  
22  
23  
24  
25  
26  
27  
28  
29  
30  
31  
32  
33  
34  
35  
36  
37  
38  
39  
40  
41  
42  
43  
44  
45  
46  
47  
48  
49  
50  
51  
52  
53  
54  
55  
56  
57  
58  
59  
60  
61  
62  
63  
64  
65

984 (a) Relative gene expression levels of *uPA* and *TGFBR3* in cells expressing different levels of  
985 dCas9-BFP-DNMT3A, dCas9-BFP-DNMT3B, dCas9-BFP-DNMT3A(E752A), or dCas9-BFP-  
986 DNMT3B(E697A). mRNA expression was measured by qPCR and quantified as fold change  
987 compared to control cells transfected with pUC19. Bar charts depict mean change in mRNA level  
988 compared to pUC19 controls. Data represent mean  $\pm$  SD (n = 3 independent transfections). Mean  
989 percentage decrease in mRNA level compared to pUC19 is presented on top of bars. Asterisks  
990 (\*) represent P value < 0.05 compared to pUC19.

991 (b-e) Dot plots of log<sub>10</sub> (transcripts per million (TPM)) for all genes expressed in the BFP positive  
992 (BFPp) cells expressing *uPA* gRNAs (T1-T5) and dCas9-BFP-DNMT3A (b), dCas9-BFP-  
993 DNMT3B (c), dCas9-BFP-DNMT1 (d), or dCas9-BFP-EGFP (e) plotted against log<sub>10</sub> (TPM) in a  
994 pUC19 control group. Differentially expressed genes (DEG) are marked in red (up-regulated) and  
995 green (down-regulated) (fold change  $\geq$  2, FDR < 0.001). Fold changes compared to pUC19 and  
996 FDR p-values for DNMT1, *DNMT3A*, *DNMT3B*, *EGFP*, and *uPA* are shown.

997 (f) Venn diagram representation of cross-comparison of DEGs.

998 (g) Integrative analysis of gene expression change, promoter methylation and promoter binding  
999 caused by dCas9-BFP-DNMT3A and *uPA* gRNAs for the different clusters of DEGs. Heatmap  
1000 represents linear regression p values. Dot plots were given for significant correlations (p < 0.05).

1  
2  
3  
4  
5  
6  
7  
8  
9  
10  
11  
12  
13  
14  
15  
16  
17  
18  
19  
20  
21  
22  
23  
24  
25  
26  
27  
28  
29  
30  
31  
32  
33  
34  
35  
36  
37  
38  
39  
40  
41  
42  
43  
44  
45  
46  
47  
48  
49  
50  
51  
52  
53  
54  
55  
56  
57  
58  
59  
60  
61  
62  
63  
64  
65

## Supplementary Figure Legends

### Supplementary Fig. S1 Validation of dCas9 methyltransferase expression and uPA promoter methylation

(a) Schematic overview of the human DNA methyltransferases (DNMT1, DNMT3A and DNMT3B) with the N-terminal regulatory region, a C-terminal catalytic domain (CD), and the cytosine C5-DNA methyltransferase motifs highlighted. The first amino acid (a.a) residue of the C-terminal catalytic domain, which was fused to the dCas9, is indicated by an arrow.

(b) Representative FACS sorting and Re-analysis of HEK293T cells 48 hours after transfection. Gating for BFP positive (BFPp) and negative (BFPn) cells are indicated.

(c) Laser scanning microscopy of dCas9 methyltransferase expression in HEK293T cells, 48 hours after transfection. The BFP signal from the dCas9-BFP-DNMT1 transfected cells was enhanced since the BFP signal from the dCas9-BFP-DNMT1 fusion was initially weaker compared to that from the other three fusion proteins. Scale bar: 20  $\mu$ m.

(d) Validation of RNA-guided uPA methylation (uPA-MR1) by dCas9-BFP-DNMT3A using bisulfite Sanger sequencing.

### Supplementary Fig. S2 Validation of dCas9 methyltransferase-mediated TGFBR3 methylation in HEK293T cells by bisulfite Sanger sequencing

TGFBR3 methylation by dCas9 methyltransferase and gRNAs was validated by bisulfite Sanger sequencing. CpG methylation status is indicated according to the absolute nucleotide position and color-coded as red, methylated; blue, unmethylated; or white, unknown methylation state based on the sequencing signal.

### Supplementary Fig. S3 Validation of de novo methylation of uPA by dCas9 methyltransferase and uPA gRNAs

Line plots of uPA-MR2 methylation in cells transfected with pUC19 (control), dCas9-BFP-DNMT3A or dCas9-BFP-DNMT3B only, and dCas9-BFP-DNMT3A or dCas9-BFP-DNMT3B together with either uPA gRNAs or scrambled gRNAs.

### Supplementary Fig. S4 Effect of dCas9 methyltransferases on two potential off-target sites (SH2D3C and FAM221A).

(a-b) Schematic illustration of the SH2D3C (b) and FAM221A (c) off-target loci, with off-target sites indicated by red arrows. Sequences of uPA gRNA (T2), SH2D3C, and FAM221A off-target sites are given above, with the PAM (red letters) and mismatches (green letters) indicated. CpGs analyzed are indicated by black arrows; numbers indicate distances (in bp) from the transcription start site (TSS) of the gene (SH2D3C, NM\_001252334.1) or (FAM221A, XM\_011515369.1). Y-axis represents % mCpG level for each CpG site and X-axis represents distance (in bp) from TSS. The CpG methylation level from the control samples (pUC19 transfection) was re-plotted as a reference. Each data point in the graph represents the mean percentage of CpGs methylated  $\pm$  SD (n = 2, independent transfections).

### Supplementary Fig. S5 Effects of DNMT3B catalytic activity and expression level on de novo TGFBR3 methylation

Bar charts of % mCpG level for individual CpG sites of the TGFBR3 targeted regions in dCas9 methyltransferase-expressing cells. Cells were enriched by FACS 48 hours after transfection and sorted according to the BPF signal: +, ++, +++, +++++. The schematic illustrations above the bar charts show gRNA binding sites and CpG sites analyzed. Asterisk (\*) indicates statistical

1  
2  
3  
4 1056 significance ( $p < 0.05$ , ANOVA) compared to the pUC19 control group after Bonferroni correction.  
5 1057 Percentage values represent % decrease of *TGFBR3* expression compared to pUC19.  
6 1058  
7 1059 **Supplementary Fig. S6 WGBS analysis of cells expressing dCas9 methyltransferase and**  
8 1060 **gRNAs**  
9 1061 (a) Summary of WGBS including clean data, clean reads, clean rate, mapped reads, uniquely  
10 1062 mapped reads and rate, and bisulfite conversion rate, for each experimental group and control  
11 1063 (pUC19).  
12 1064 (b) Average percentage of methylated cytosine (% mC) for whole-genome CpG sites, CHG sites,  
13 1065 and CHH sites. "H" represents A, C, and T.  
14 1066 (c-d) Average mCpG level (percentage) stratified according to individual chromosome or whole  
15 1067 genome for all samples measured by WGBS.  
16 1068  
17 1069 **Supplementary Fig. S7 Differentially methylated regions (DMRs) identified by DSS-single**  
18 1070 **method.** DMRs were categorized as hypermethylated or hypomethylated compared to control  
19 1071 sample (pUC19 transfection).  
20 1072  
21 1073 **Supplementary Fig. S8 Histogram charts of the distribution of DMR length (bp), and**  
22 1074 **number of CpGs per DMR.** DMRs included in this figure are those remaining after the stringent  
23 1075 filtering step (see methods). Mean DMRs length (in bp) and mean number of CpG per DMR were  
24 1076 given for each chart.  
25 1077  
26 1078 **Supplementary Fig. S9 Genomic characteristics of off-target DMRs caused by dCas9**  
27 1079 **methyltransferases and TGFBR3 gRNAs**  
28 1080 (a) Box plot (top) and heatmap clustering (bottom) of the hypermethylated (left) and  
29 1081 hypomethylated (right) DMRs caused by *dCas9 methyltransferases* and *TGFBR3* gRNAs.  
30 1082 (b-c) Bar chart illustrating the percentage of the identified *TGFBR3* hypermethylated (c) or  
31 1083 hypomethylated (d) DMRs that fall into the different types of genomic regions indicated.  
32 1084 Background represents of a random sample of the same number of similar sized genomic  
33 1085 windows that fall into the categories indicated. Values above bars are P values between  
34 1086 background and *TGFBR3* DMRs, Fisher's exact test.  
35 1087 (d) Metaplot of average CpG methylation levels in 58,494 DNase I hypersensitive sites (DHS)  
36 1088 and 1 kb upstream and downstream flanking regions.  
37 1089 (e-f) Bar chart of % *TGFBR3* hypermethylated (f) or hypomethylated (g) DMRs falling into DHS  
38 1090 core regions.  
39 1091 (h) Density of 5nt-SEED-NGG for *TGFBR3* gRNAs (T1 to T3) in background genomic windows  
40 1092 and *TGFBR3* DMRs + flanking 100 bp. Values represent median density with one standard  
41 1093 deviation. P values (t-test) are given above the bar charts.  
42 1094  
43 1095 **Supplementary Fig. S10 Average methylation levels of seven genomic regions in all**  
44 1096 **annotated genes (hg19).** (a-d) Each line indicates the genome-wide average methylation levels  
45 1097 across seven genomic regions: upstream 2kb of the transcription start site, first exon, first intron,  
46 1098 internal exons, internal introns, last exon, and downstream 2kb of the last exon.  
47 1099  
48 1100  
49 1101 **Supplementary Fig. S11 The average methylation level in ChIP-peaks and flanking regions.**  
50 1102 Bar chat presents the average methylation level of all dCas9-BFP-DNMT3A and uPA gRNA off-  
51 1103 target binding sites ( $n = 7754$ ) found by ChIPseq, as well as the 2kb upstream and downstream  
52 1104 region.

1  
2  
3  
4  
5  
6  
7  
8  
9  
10  
11  
12  
13  
14  
15  
16  
17  
18  
19  
20  
21  
22  
23  
24  
25  
26  
27  
28  
29  
30  
31  
32  
33  
34  
35  
36  
37  
38  
39  
40  
41  
42  
43  
44  
45  
46  
47  
48  
49  
50  
51  
52  
53  
54  
55  
56  
57  
58  
59  
60  
61  
62  
63  
64  
65

**Supplementary Fig. S12 Effect of dCas9 methyltransferases and uPA gRNAs on cell growth.** Cell growth was determined by counting the number of cell clones derived from 1,000 BFP positive cells after transfection. Values represent mean and one standard deviation from 6 experimental repeats. Asterisks represent a p value < 0.05 (ANOVA) compared to pUC19 transfection control.

**Supplementary Fig. S13 Effects of dCas9 methyltransferases on mCherry expression in fluorescence reporter cell lines**

(a) Schematic illustration of the mCherry fluorescence transgene expression cassette. The target sites of the gRNAs within the CMV promoter are indicated by red arrows (5'-3', targeting sense or antisense strands).

(b) Southern blot analysis of five cell clones with the transgene cassette randomly and stably integrated into the genome.

(c) Flow cytometry-based analysis of the percentage of BFP positive cells in the fluorescence reporter cells at 2, 5, 8 and 14 days after transient transfection with CMV gRNAs (T1-T3) and dCas9-BFP-DNMT1, dCas9-BFP-DNMT3A, dCas9-BFP-DNMT3B, or dCas9-BFP-EGFP.

(d-h) % mCherry fluorescence median intensity in these five clones at day 2, 5, 8, and 14 days following transient transfection with CMV gRNAs (T1-T3) and dCas9-BFP-DNMT1, dCas9-BFP-DNMT3A, dCas9-BFP-DNMT3B, or dCas9-BFP-EGFP. Control cells were transfected with pUC19. Percent inhibition of mCherry expression was calculated by normalizing the median mCherry fluorescence intensity to that from the pUC19 transfected cells at each time point. Figures are plotted using the mean % mCherry median  $\pm$  SD (n = 3, independent transfections). ANOVA with Bonferroni comparison was performed for cell clone 2. "a", "b", "c", and "d," indicates a p-value < 0.05 compared to the pUC19 control for the corresponding transfection group.

**Supplementary Table S1** List of plasmids deposited to Addgene, qPCR primers, gRNA sequences, bisulfite PCR primers, bisulfite pyrosequencing primers, and DNA regions analyzed for methylation.

**Supplementary Table S2** List of hypermethylated DMRs caused by dCas9 methyltransferases and uPA gRNAs

**Supplementary Table S3** List of hypomethylated DMRs caused by dCas9 methyltransferases and uPA gRNAs

**Supplementary Table S4** List of hypermethylated DMRs caused by dCas9 methyltransferases and TGFBR3 gRNAs

**Supplementary Table S5** List of hypomethylated DMRs caused by dCas9 methyltransferases and TGFBR3 gRNAs

**Supplementary Table S6** List of binding peaks caused by dCas9-BFP-DNMT3A and uPA gRNAs

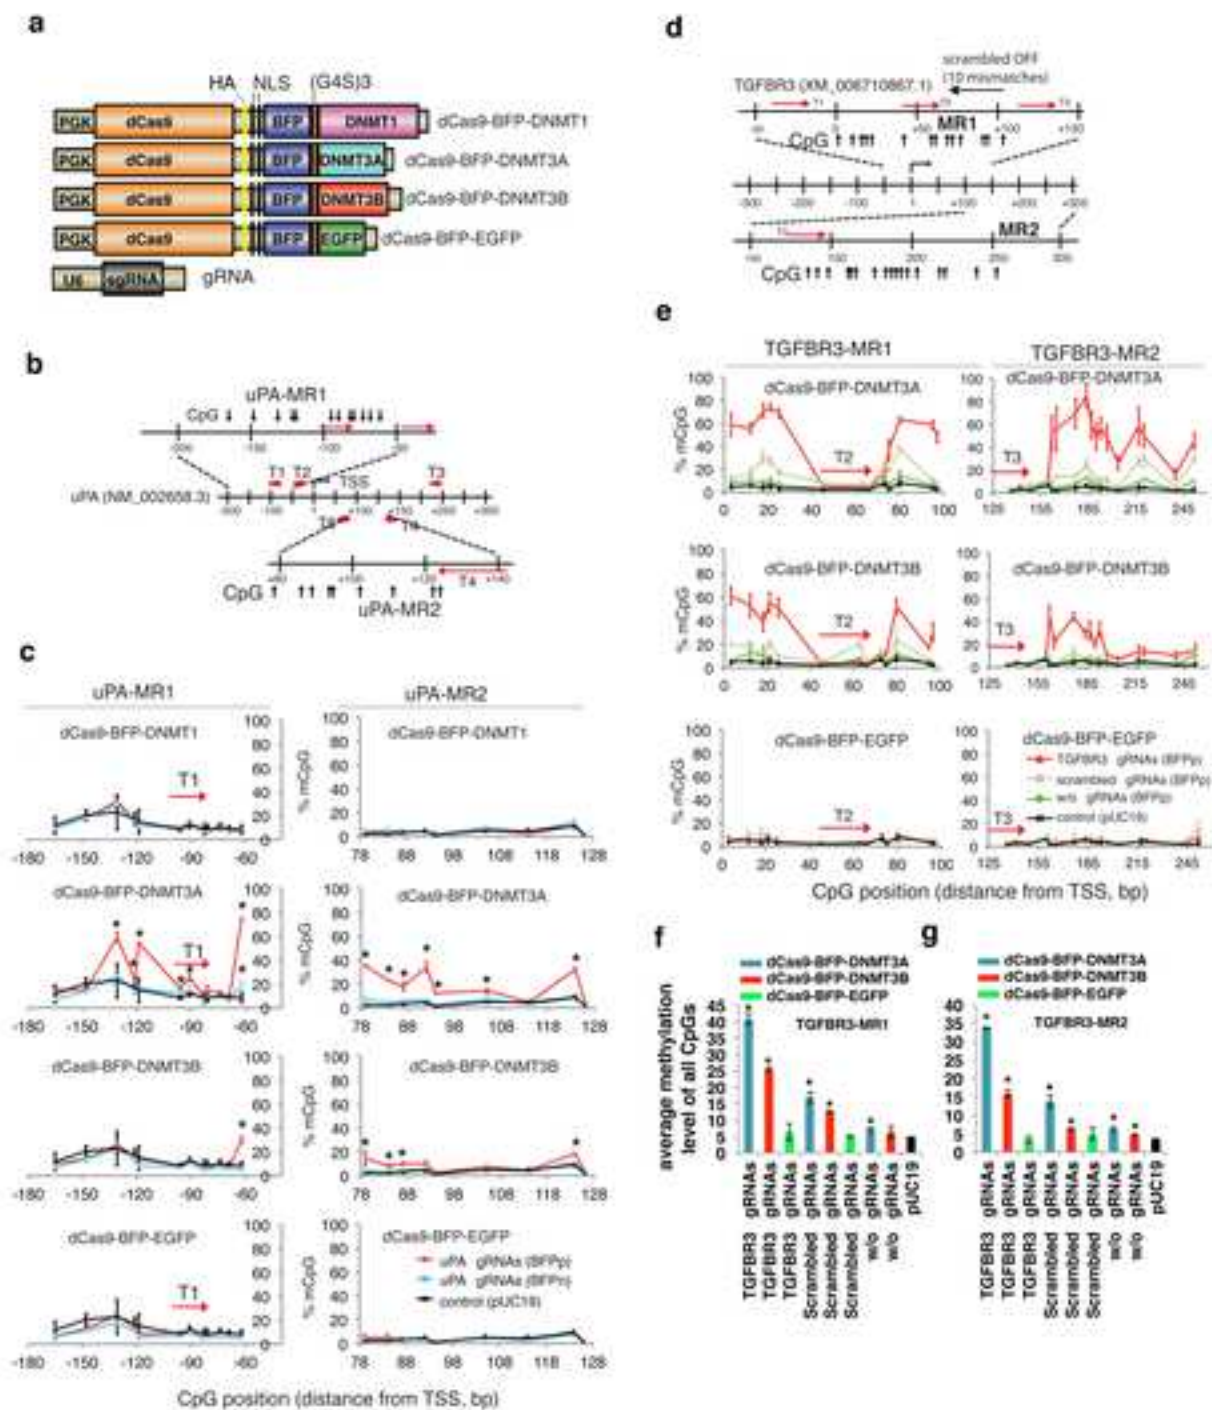



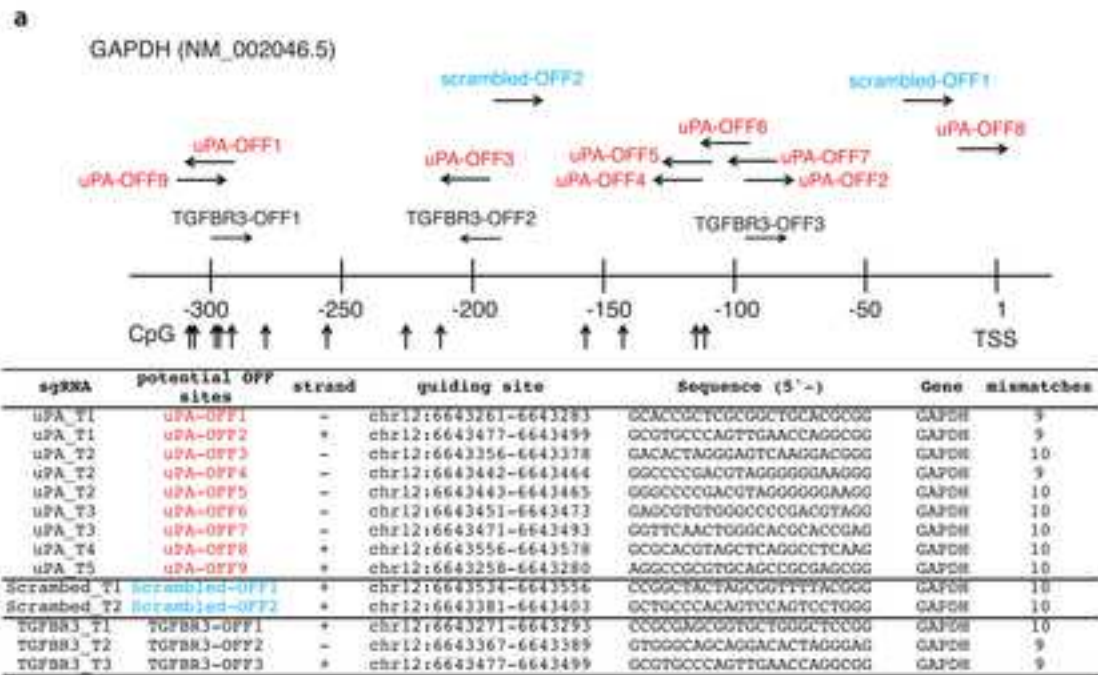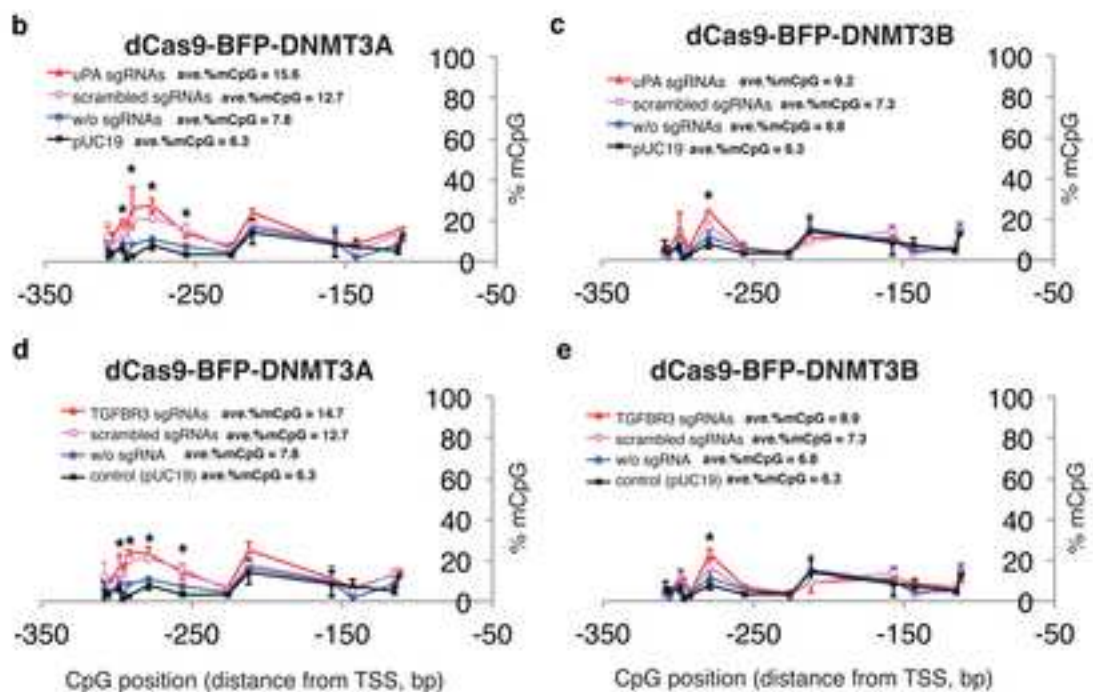

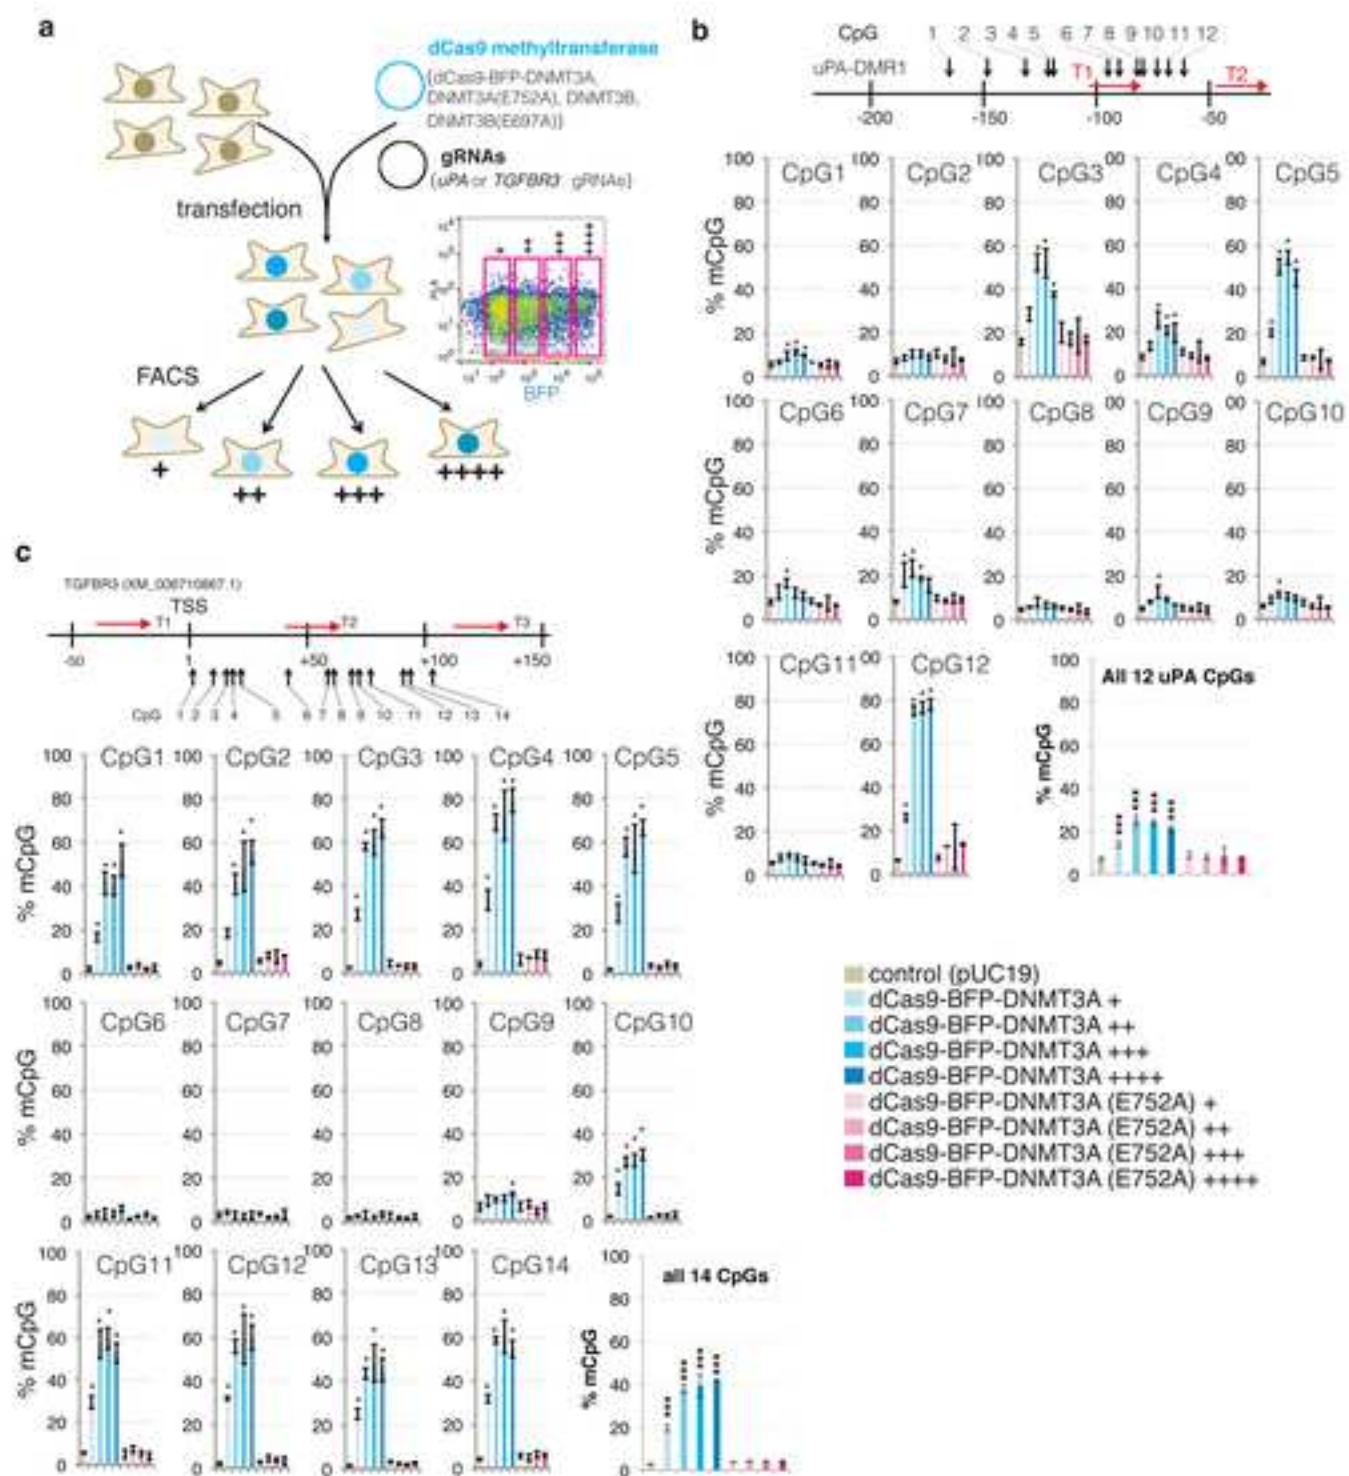

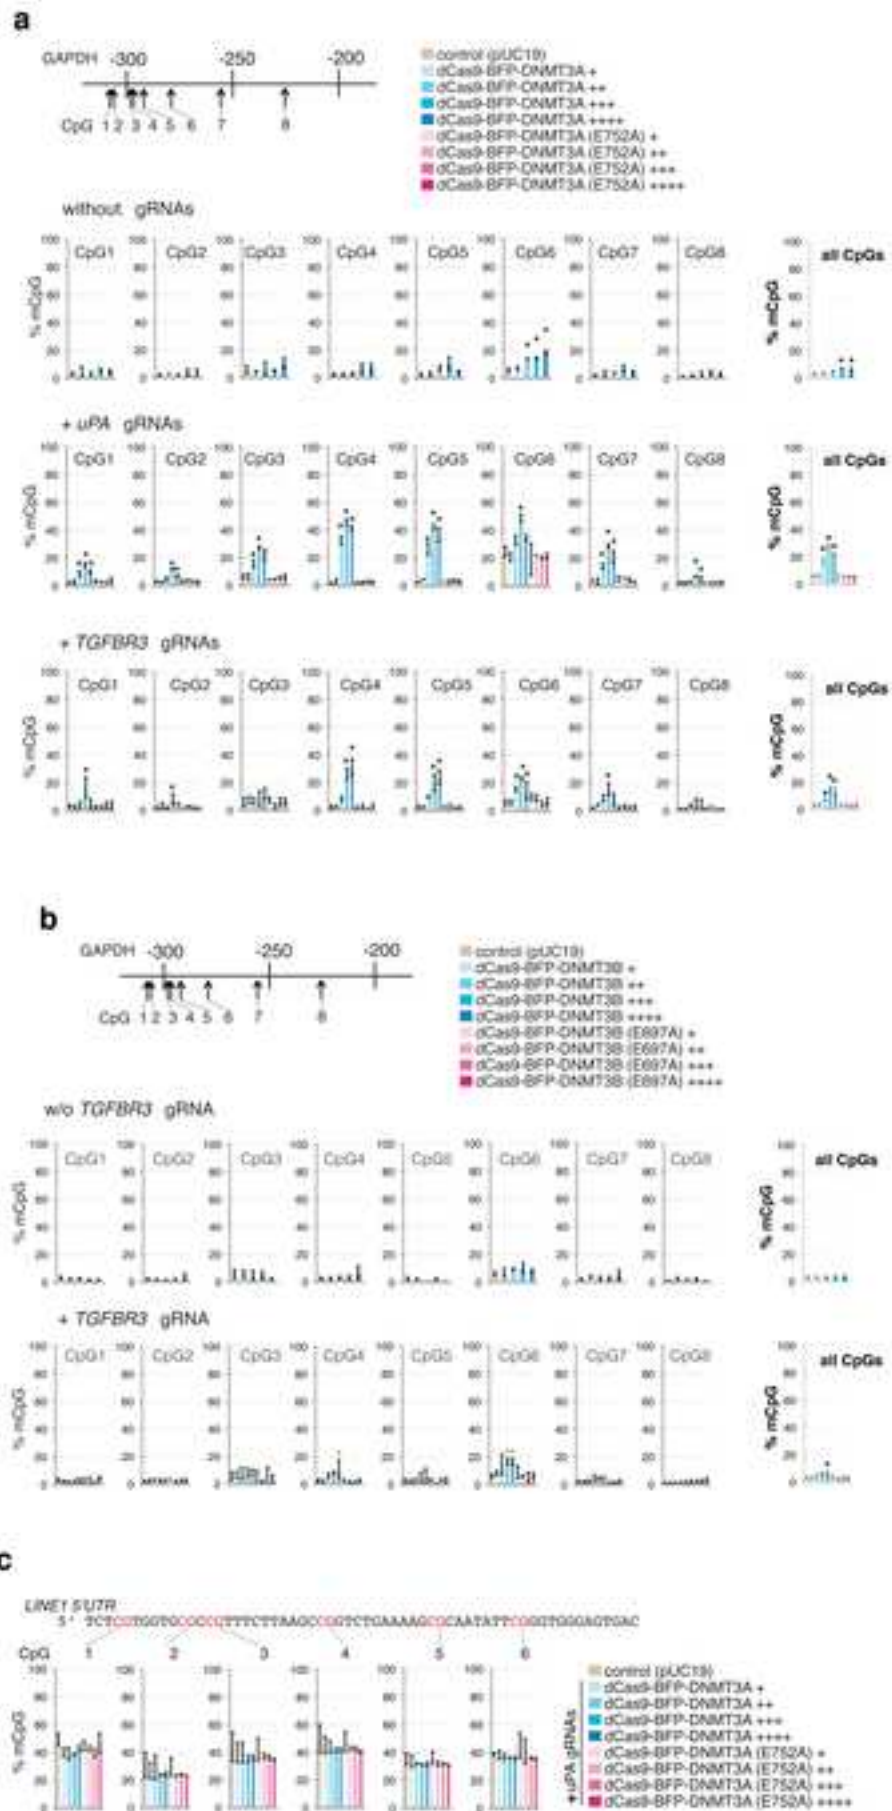

Fig. 5

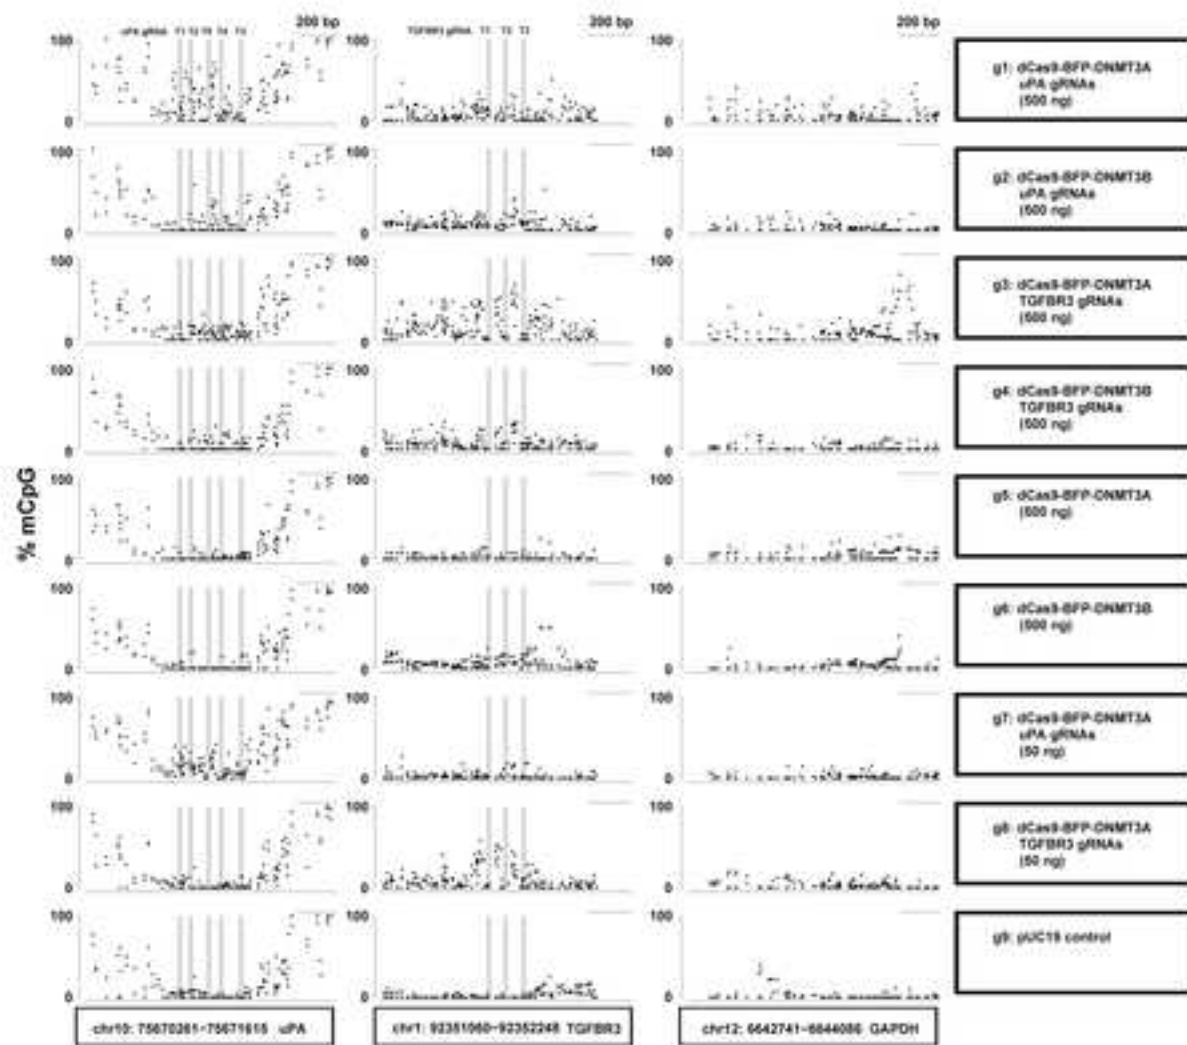

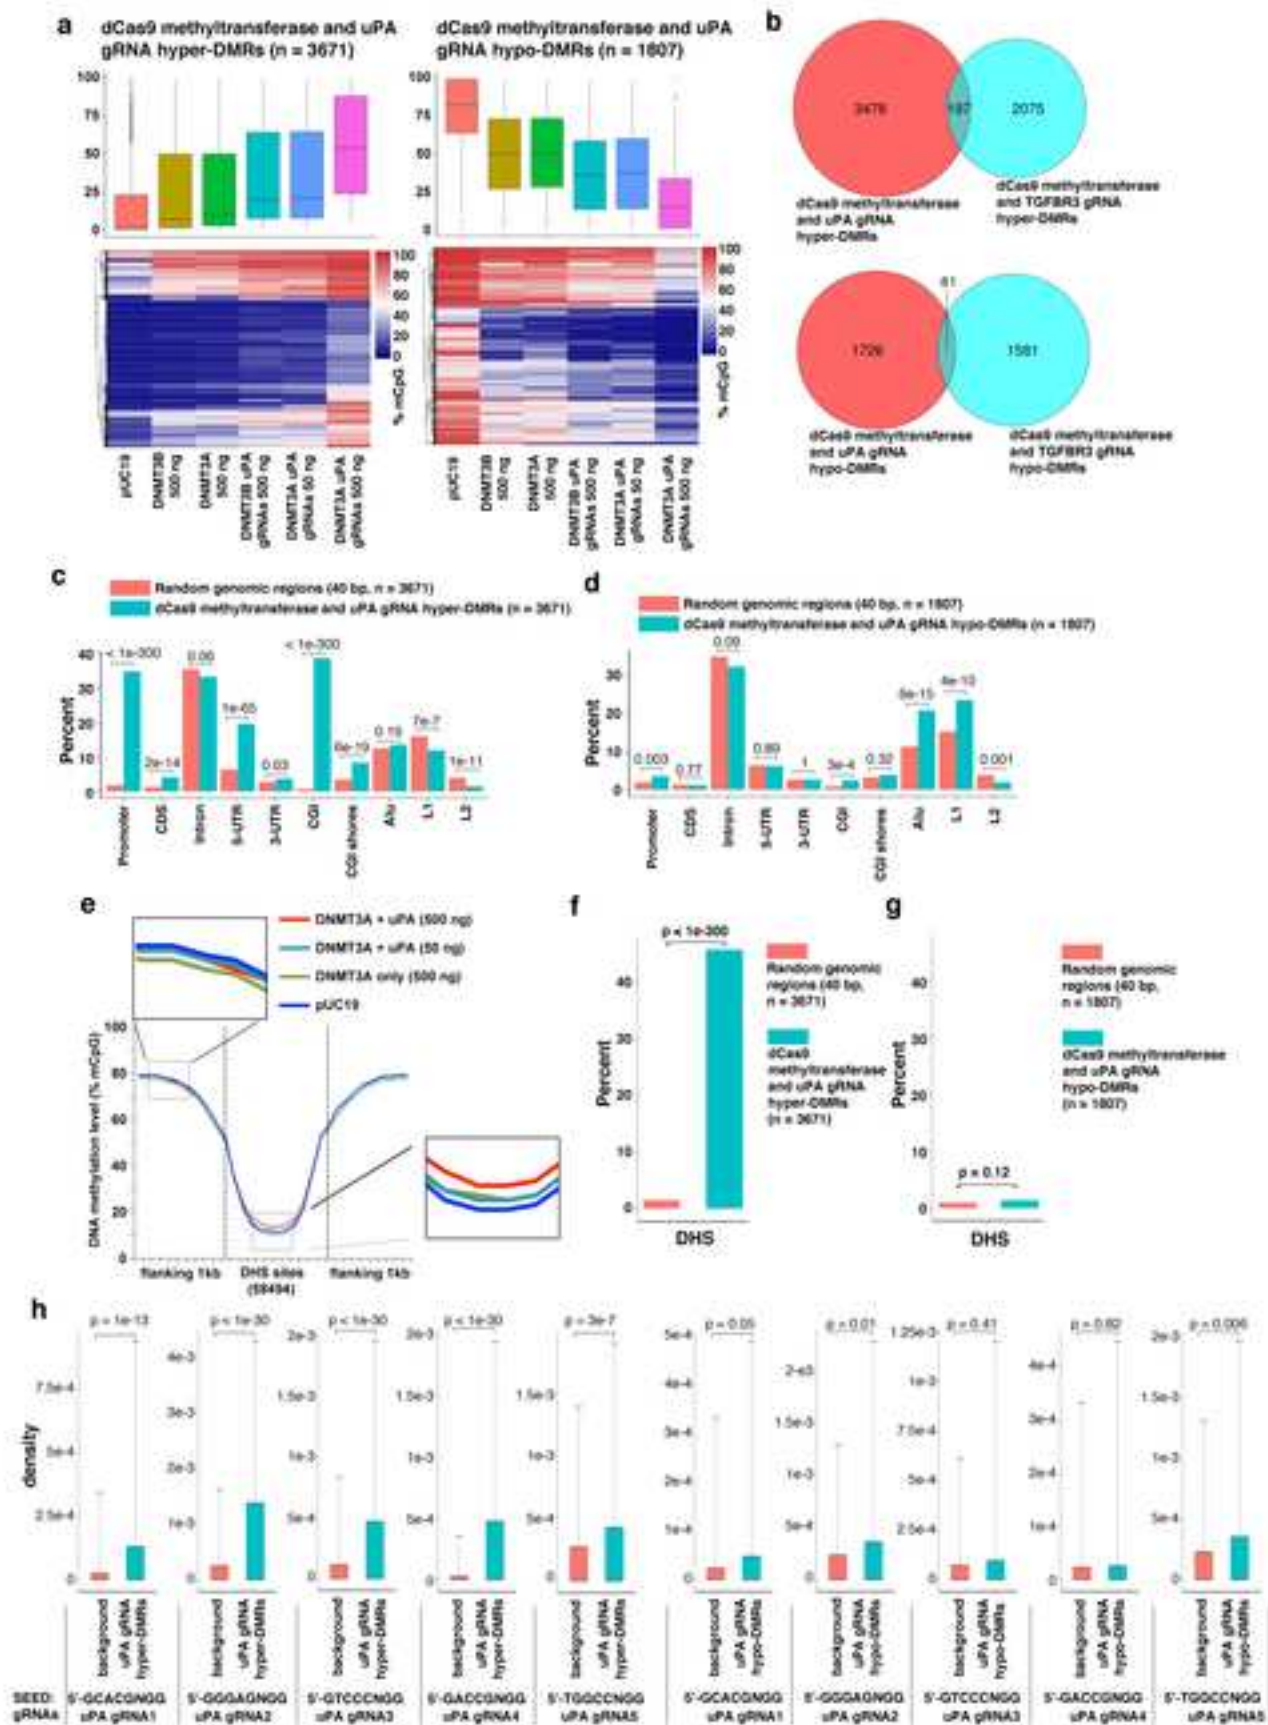

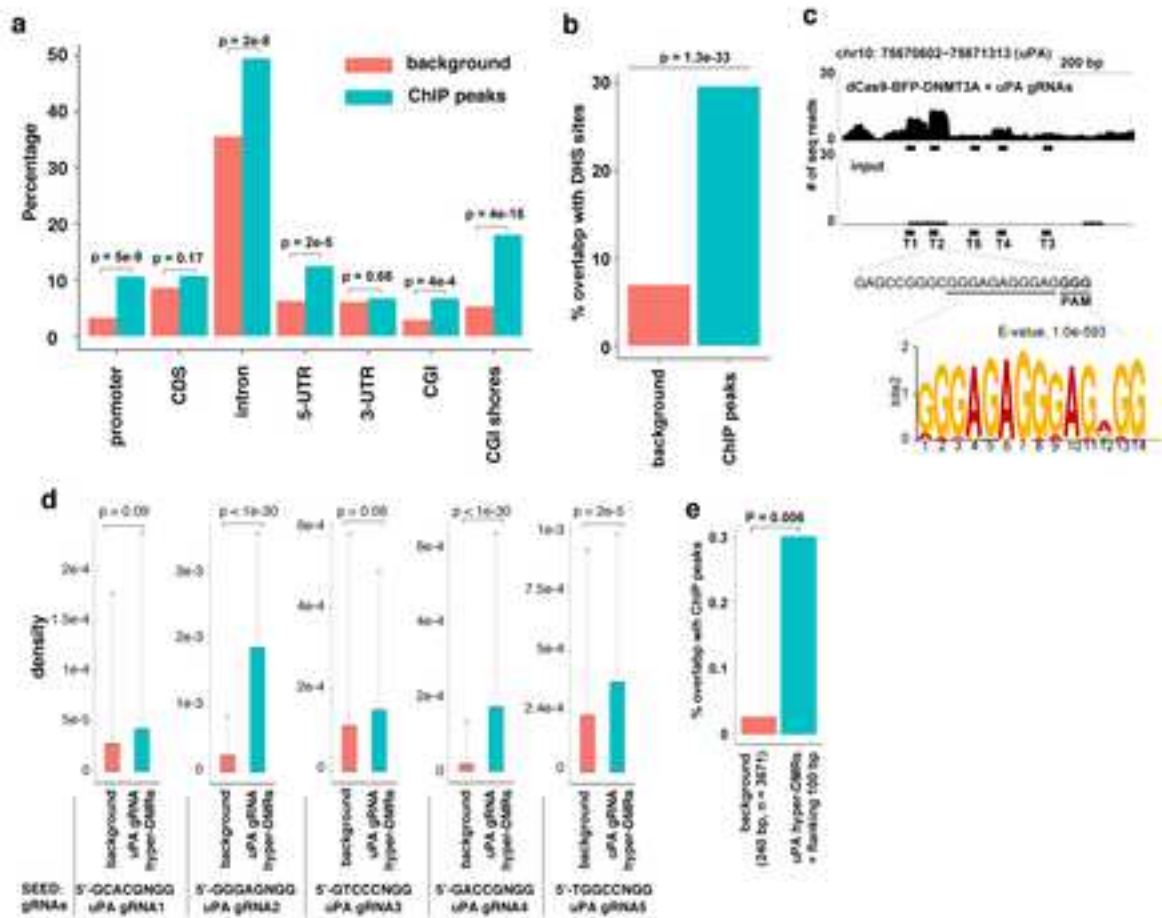

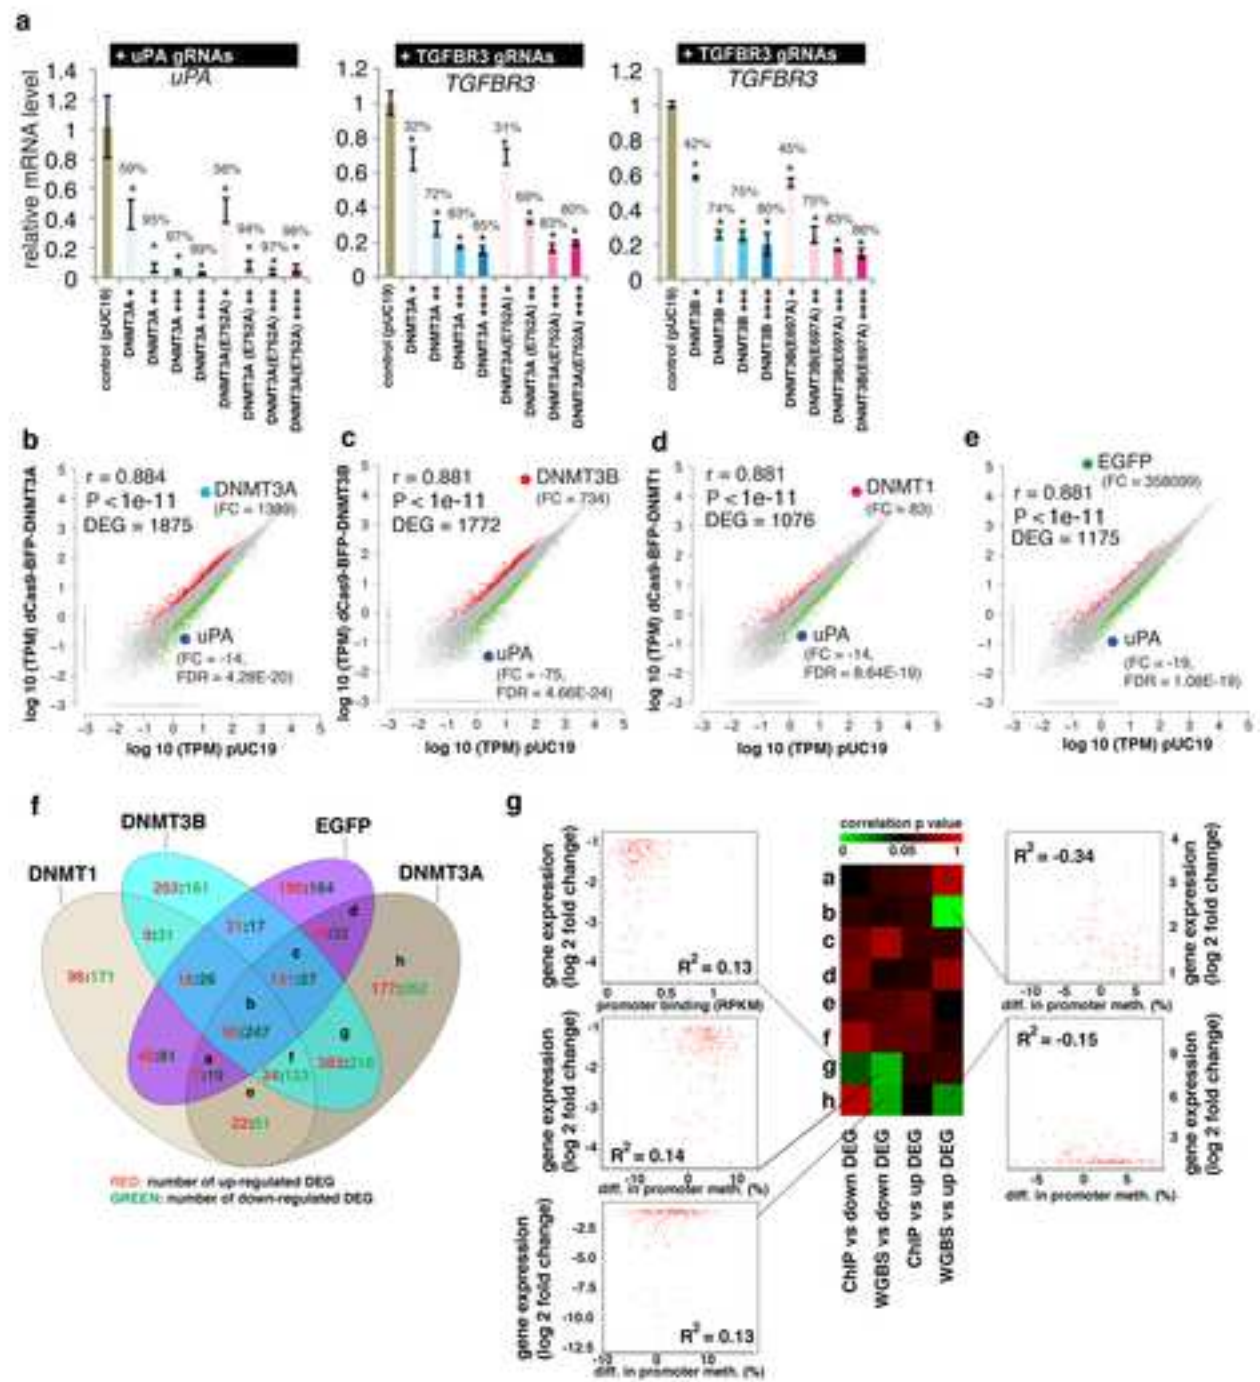



Click here to access/download  
**Supplementary Material**  
Fig.S1.tif





Click here to access/download  
**Supplementary Material**  
Fig.S2.tif





Click here to access/download  
**Supplementary Material**  
Fig.S3.tif





Click here to access/download  
**Supplementary Material**  
Fig.S4.tif



Click here to access/download  
**Supplementary Material**  
Fig.S5.tif





Click here to access/download  
**Supplementary Material**  
Fig.S6.tif



Click here to access/download  
**Supplementary Material**  
Fig.S7.tif



Click here to access/download  
**Supplementary Material**  
Fig.S8.tif





Click here to access/download  
**Supplementary Material**  
Fig.S9.tif





Click here to access/download  
**Supplementary Material**  
Fig.S10.tif



Click here to access/download  
**Supplementary Material**  
Fig.S11.tif





Click here to access/download  
**Supplementary Material**  
Fig.S12.tif





Click here to access/download  
**Supplementary Material**  
Fig.S13.tif

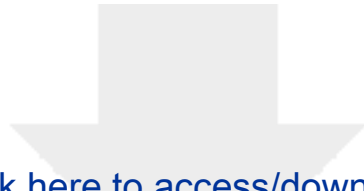

Click here to access/download  
**Supplementary Material**  
Supplementary Table S1.docx

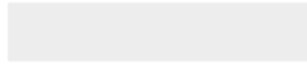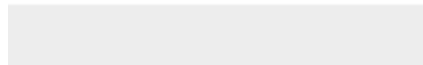

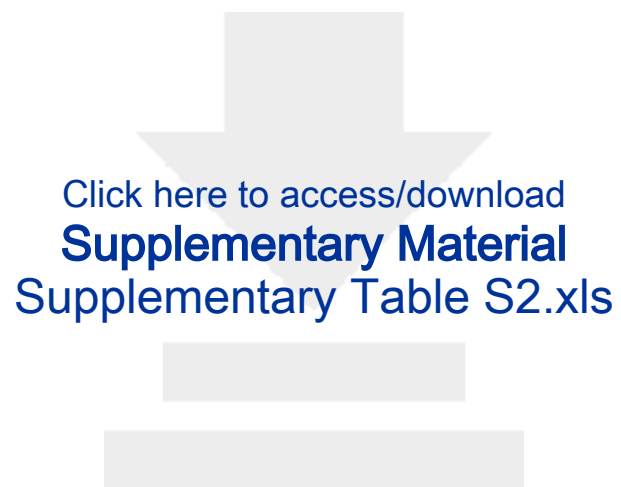

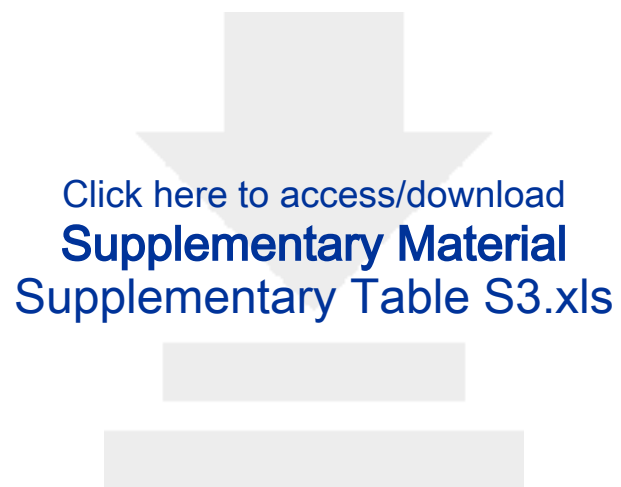

Click here to access/download  
**Supplementary Material**  
Supplementary Table S3.xls

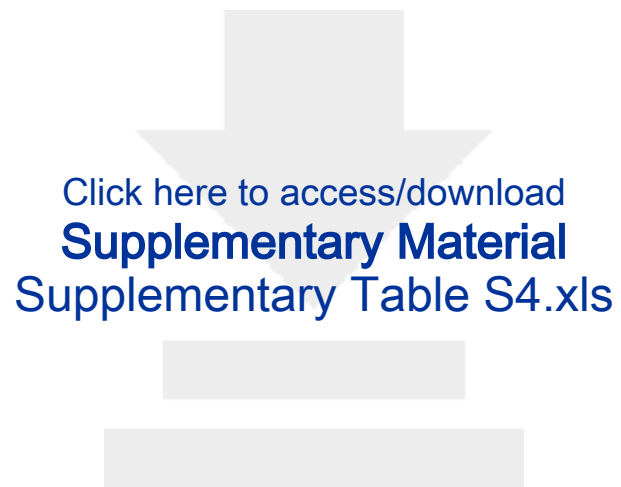

Click here to access/download  
**Supplementary Material**  
Supplementary Table S4.xls



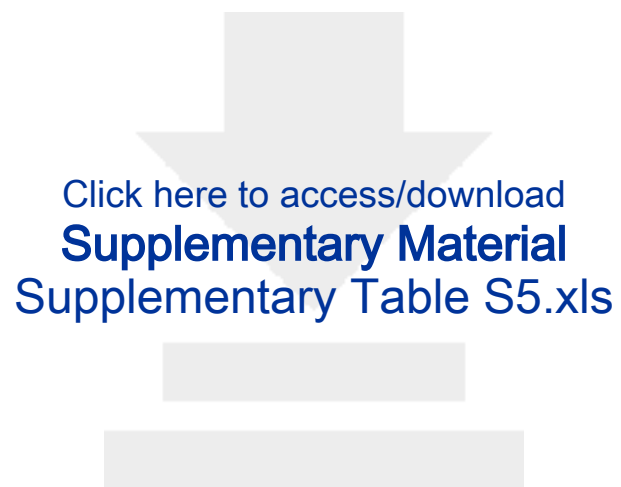

Click here to access/download  
**Supplementary Material**  
Supplementary Table S5.xls

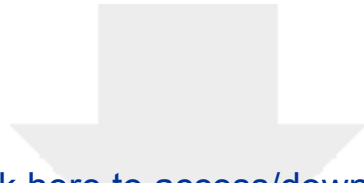

Click here to access/download  
**Supplementary Material**  
Supplementary Table S6.xls

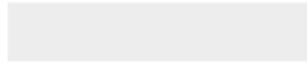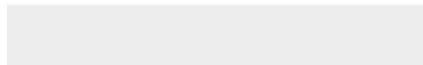



[Click here to access/download](#)

**Supplementary Material**

Supplementary File 1- extended text and discussion.pdf

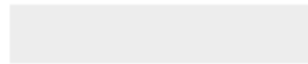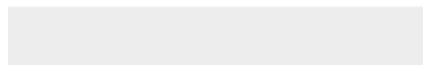

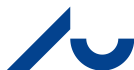

DEPARTMENT OF BIOMEDICINE  
FACULTY OF HEALTH  
AARHUS UNIVERSITY

**To GigaScience editors**

**Dear Editor Scott Edmunds:**

First of all, we would like to thank you and the reviewers constructive and valuable comments and suggestions for the further improvement of our study. It is very important that we bring the correct and significance finding, technology and knowledge to the broad readers of GigaScience and the scientific community. Secondly, we really appreciate the extended time for us to prepare a better revision.

In the revision, all important changes are highlighted in blue text. Just to highlight a few major revisions here for you:

Department of Biomedicine  
Aarhus University

Yonglun Luo

PhD. Associate Professor

Date: June. 29, 2017

—

Direct Tel.: +45 8716 7761  
Fax: +45 8612 3173  
E-mail: [alun@biomed.au.dk](mailto:alun@biomed.au.dk)

1. We have conducted two more dCas9 methyltransferase and uPA gRNA ChIP-seq repeats. These NGS data will be deposited to the GigaScience database.
2. We have included both hyper-methylated and hypo-methylated DMRs into the analysis in the revision.
3. We have included a more stringent filtering step for the detection of DMRs.
4. The manuscript has been greatly shorten. We have prepared a separated section for the CRISPR2.0 study, and would like to present it as extended supplementary results.
5. We have carefully revised our conclusion on DNA methylation and gene expression.

Thanks again for giving us the opportunity to submit our revised study for consideration of publication in your journal.

Sincerely,

Yonglun Luo, on behalf of all authors.

29/06/2017, Iceland.

Department of Biomedicine  
Aarhus University  
Building 11240  
Wilhelm Meyers Alle 4  
8000 Aarhus C

E-mail: [biomed@au.dk](mailto:biomed@au.dk)  
<http://www.biomed.au.dk>
