# Supplementary material for: Genome-wide determination of on-target and off-target characteristics for RNA-guided DNA methylation by dCas9 methyltransferases
Source: Oxford University Press journal article supplement (doi:10.1093/gigascience/giy011), 2018-02-19
Supplement: giy011_giga-d-17-00040_revision_4.pdf [file giy011_giga-d-17-00040_revision_4.pdf]

## Genome-wide determination of on-target and off-target characteristics for RNA-guided DNA Methylation by dCas9 methyltransferases

--Manuscript Draft--

|                             |                                                                                                                                                                                                                                                                                                                                                                                                                                                                                                                                                                                                                                                                                                                                                                                                                                                                                                                                                                                                                                                                                                                                                                                                                                                                                                                                                                                                                                                                                                                                                                                                                                                                                                                                                                                                                                                                                                                                                                                                                                                                                                                                                                                                                                                                                                                                                                                     |                           |
|-----------------------------|-------------------------------------------------------------------------------------------------------------------------------------------------------------------------------------------------------------------------------------------------------------------------------------------------------------------------------------------------------------------------------------------------------------------------------------------------------------------------------------------------------------------------------------------------------------------------------------------------------------------------------------------------------------------------------------------------------------------------------------------------------------------------------------------------------------------------------------------------------------------------------------------------------------------------------------------------------------------------------------------------------------------------------------------------------------------------------------------------------------------------------------------------------------------------------------------------------------------------------------------------------------------------------------------------------------------------------------------------------------------------------------------------------------------------------------------------------------------------------------------------------------------------------------------------------------------------------------------------------------------------------------------------------------------------------------------------------------------------------------------------------------------------------------------------------------------------------------------------------------------------------------------------------------------------------------------------------------------------------------------------------------------------------------------------------------------------------------------------------------------------------------------------------------------------------------------------------------------------------------------------------------------------------------------------------------------------------------------------------------------------------------|---------------------------|
| <b>Manuscript Number:</b>   | GIGA-D-17-00040R4                                                                                                                                                                                                                                                                                                                                                                                                                                                                                                                                                                                                                                                                                                                                                                                                                                                                                                                                                                                                                                                                                                                                                                                                                                                                                                                                                                                                                                                                                                                                                                                                                                                                                                                                                                                                                                                                                                                                                                                                                                                                                                                                                                                                                                                                                                                                                                   |                           |
| <b>Full Title:</b>          | Genome-wide determination of on-target and off-target characteristics for RNA-guided DNA Methylation by dCas9 methyltransferases                                                                                                                                                                                                                                                                                                                                                                                                                                                                                                                                                                                                                                                                                                                                                                                                                                                                                                                                                                                                                                                                                                                                                                                                                                                                                                                                                                                                                                                                                                                                                                                                                                                                                                                                                                                                                                                                                                                                                                                                                                                                                                                                                                                                                                                    |                           |
| <b>Article Type:</b>        | Research                                                                                                                                                                                                                                                                                                                                                                                                                                                                                                                                                                                                                                                                                                                                                                                                                                                                                                                                                                                                                                                                                                                                                                                                                                                                                                                                                                                                                                                                                                                                                                                                                                                                                                                                                                                                                                                                                                                                                                                                                                                                                                                                                                                                                                                                                                                                                                            |                           |
| <b>Funding Information:</b> | Teknologi og Produktion, Det Frie Forskningsråd (DFF-1337-00128)                                                                                                                                                                                                                                                                                                                                                                                                                                                                                                                                                                                                                                                                                                                                                                                                                                                                                                                                                                                                                                                                                                                                                                                                                                                                                                                                                                                                                                                                                                                                                                                                                                                                                                                                                                                                                                                                                                                                                                                                                                                                                                                                                                                                                                                                                                                    | Prof. Yonglun Luo         |
|                             | Teknologi og Produktion, Det Frie Forskningsråd (DFF-1335-00763A)                                                                                                                                                                                                                                                                                                                                                                                                                                                                                                                                                                                                                                                                                                                                                                                                                                                                                                                                                                                                                                                                                                                                                                                                                                                                                                                                                                                                                                                                                                                                                                                                                                                                                                                                                                                                                                                                                                                                                                                                                                                                                                                                                                                                                                                                                                                   | Prof. Yonglun Luo         |
|                             | Innovation Fund Denmark (BrainStem)                                                                                                                                                                                                                                                                                                                                                                                                                                                                                                                                                                                                                                                                                                                                                                                                                                                                                                                                                                                                                                                                                                                                                                                                                                                                                                                                                                                                                                                                                                                                                                                                                                                                                                                                                                                                                                                                                                                                                                                                                                                                                                                                                                                                                                                                                                                                                 | Prof. Yonglun Luo         |
|                             | Lundbeckfonden (R173-2014-1105)                                                                                                                                                                                                                                                                                                                                                                                                                                                                                                                                                                                                                                                                                                                                                                                                                                                                                                                                                                                                                                                                                                                                                                                                                                                                                                                                                                                                                                                                                                                                                                                                                                                                                                                                                                                                                                                                                                                                                                                                                                                                                                                                                                                                                                                                                                                                                     | Prof. Yonglun Luo         |
|                             | Lundbeckfonden (R151-2013-14439)                                                                                                                                                                                                                                                                                                                                                                                                                                                                                                                                                                                                                                                                                                                                                                                                                                                                                                                                                                                                                                                                                                                                                                                                                                                                                                                                                                                                                                                                                                                                                                                                                                                                                                                                                                                                                                                                                                                                                                                                                                                                                                                                                                                                                                                                                                                                                    | Prof. Lars Bolund         |
|                             | Lundbeckfonden (R219-2016-1375)                                                                                                                                                                                                                                                                                                                                                                                                                                                                                                                                                                                                                                                                                                                                                                                                                                                                                                                                                                                                                                                                                                                                                                                                                                                                                                                                                                                                                                                                                                                                                                                                                                                                                                                                                                                                                                                                                                                                                                                                                                                                                                                                                                                                                                                                                                                                                     | Dr. Lin Lin               |
|                             | Toyota Foundation (JP)                                                                                                                                                                                                                                                                                                                                                                                                                                                                                                                                                                                                                                                                                                                                                                                                                                                                                                                                                                                                                                                                                                                                                                                                                                                                                                                                                                                                                                                                                                                                                                                                                                                                                                                                                                                                                                                                                                                                                                                                                                                                                                                                                                                                                                                                                                                                                              | Prof. Anders Lade Nielsen |
|                             | Lundbeckfonden                                                                                                                                                                                                                                                                                                                                                                                                                                                                                                                                                                                                                                                                                                                                                                                                                                                                                                                                                                                                                                                                                                                                                                                                                                                                                                                                                                                                                                                                                                                                                                                                                                                                                                                                                                                                                                                                                                                                                                                                                                                                                                                                                                                                                                                                                                                                                                      | Prof. Anders Lade Nielsen |
| <b>Abstract:</b>            | <p><b>Background</b><br/>Fusion of DNA methyltransferase domains to the nuclease-deficient clustered regularly interspaced short palindromic repeat (CRISPR) associated protein 9 (dCas9) has been used for epigenome editing, but the specificities of these dCas9 methyltransferases have not been fully investigated.</p> <p><b>Findings</b><br/>We generated CRISPR-guided DNA methyltransferases by fusing the catalytic domain of DNMT3A or DNMT3B to the C terminus of the dCas9 protein from <i>S. pyogenes</i> and validated its on-target and global off-target characteristics. Using targeted quantitative bisulfite pyrosequencing, we prove that dCas9-BFP-DNMT3A and dCas9-BFP-DNMT3B can efficiently methylate the CpG dinucleotides flanking its target sites at different genomic loci (uPA and TGFBR3) in human embryonic kidney cells (HEK293T). Furthermore, we conducted whole genome bisulfite sequencing (WGBS) to address the specificity of our dCas9 methyltransferases. WGBS revealed that although dCas9-BFP-DNMT3A and dCas9-BFP-DNMT3B did not cause global methylation changes, a substantial number (over 1000) of off-target differentially methylated regions (DMRs) were identified. The off-target DMRs, which were hypermethylated in cells expressing dCas9 methyltransferase and gRNAs, were predominantly found in promoter regions, 5' untranslated regions, CpG islands, and DNase I hypersensitivity sites, whereas, unexpected hypomethylated off-target DMRs were significantly enriched in repeated sequences. Through chromatin immunoprecipitation with massive parallel DNA sequencing analysis, we further revealed that these off-target DMRs were weakly correlated with dCas9 off-target binding sites. Using qPCR, RNA sequencing and fluorescence reporter cells, we also found that dCas9-BFP-DNMT3A and dCas9-BFP-DNMT3B can mediate transient inhibition of gene expression, which might be caused by dCas9-mediated de novo DNA methylation as well as interference with transcription.</p> <p><b>Conclusion</b><br/>Our results prove that dCas9 methyltransferases cause efficient RNA-guided methylation of specific endogenous CpGs. However, there is significant off-target methylation indicating that further improvements of the specificity of CRISPR-dCas9 based DNA methylation modifiers are required.</p> |                           |

|                                                      |                                                                                                                                                                                                                                                                                                                                                                                                                                                               |
|------------------------------------------------------|---------------------------------------------------------------------------------------------------------------------------------------------------------------------------------------------------------------------------------------------------------------------------------------------------------------------------------------------------------------------------------------------------------------------------------------------------------------|
| <b>Corresponding Author:</b>                         | Yonglun Luo<br>Aarhus Universitet Health<br>Aarhus, DENMARK                                                                                                                                                                                                                                                                                                                                                                                                   |
| <b>Corresponding Author Secondary Information:</b>   |                                                                                                                                                                                                                                                                                                                                                                                                                                                               |
| <b>Corresponding Author's Institution:</b>           | Aarhus Universitet Health                                                                                                                                                                                                                                                                                                                                                                                                                                     |
| <b>Corresponding Author's Secondary Institution:</b> |                                                                                                                                                                                                                                                                                                                                                                                                                                                               |
| <b>First Author:</b>                                 | Lin Lin                                                                                                                                                                                                                                                                                                                                                                                                                                                       |
| <b>First Author Secondary Information:</b>           |                                                                                                                                                                                                                                                                                                                                                                                                                                                               |
| <b>Order of Authors:</b>                             | Lin Lin                                                                                                                                                                                                                                                                                                                                                                                                                                                       |
|                                                      | Yong Liu                                                                                                                                                                                                                                                                                                                                                                                                                                                      |
|                                                      | Fengping Xu                                                                                                                                                                                                                                                                                                                                                                                                                                                   |
|                                                      | Jingrong Huang                                                                                                                                                                                                                                                                                                                                                                                                                                                |
|                                                      | Tina Fuglsang Daugaard                                                                                                                                                                                                                                                                                                                                                                                                                                        |
|                                                      | Trine Skov Petersen                                                                                                                                                                                                                                                                                                                                                                                                                                           |
|                                                      | Bettina Hansen                                                                                                                                                                                                                                                                                                                                                                                                                                                |
|                                                      | Lingfei ye                                                                                                                                                                                                                                                                                                                                                                                                                                                    |
|                                                      | Qing Zhou                                                                                                                                                                                                                                                                                                                                                                                                                                                     |
|                                                      | Fang Fang                                                                                                                                                                                                                                                                                                                                                                                                                                                     |
|                                                      | Ling Yang                                                                                                                                                                                                                                                                                                                                                                                                                                                     |
|                                                      | Shengting Li                                                                                                                                                                                                                                                                                                                                                                                                                                                  |
|                                                      | Lasse Fløe                                                                                                                                                                                                                                                                                                                                                                                                                                                    |
|                                                      | Kristopher Torp Jensen                                                                                                                                                                                                                                                                                                                                                                                                                                        |
|                                                      | Ellen Shrock                                                                                                                                                                                                                                                                                                                                                                                                                                                  |
|                                                      | Fang Chen                                                                                                                                                                                                                                                                                                                                                                                                                                                     |
|                                                      | Huanming Yang                                                                                                                                                                                                                                                                                                                                                                                                                                                 |
|                                                      | Jian Wang                                                                                                                                                                                                                                                                                                                                                                                                                                                     |
|                                                      | Xin Liu                                                                                                                                                                                                                                                                                                                                                                                                                                                       |
|                                                      | Xun Xu                                                                                                                                                                                                                                                                                                                                                                                                                                                        |
|                                                      | Lars Bolund                                                                                                                                                                                                                                                                                                                                                                                                                                                   |
|                                                      | Anders Lade Nielsen                                                                                                                                                                                                                                                                                                                                                                                                                                           |
|                                                      | Yonglun Luo                                                                                                                                                                                                                                                                                                                                                                                                                                                   |
| <b>Order of Authors Secondary Information:</b>       |                                                                                                                                                                                                                                                                                                                                                                                                                                                               |
| <b>Response to Reviewers:</b>                        | <p>Dear GigaScience Editorial team and reviewers,</p> <p>Great thanks for all the constructive comments to our manuscript. We have included the addition discussion on the off-target effects of dCas9-based methyltransferases and other effector proteins. In addition, we have cited the GigaDB file of our study in the revised MS (highlighted in blue).</p> <p>All supplementary files are now converted to the correct format.</p> <p>Kr,<br/>Alun</p> |

|                                                                                                                                                                                                                                                                                                                                                                                                                                                                                                                                                         |                 |
|---------------------------------------------------------------------------------------------------------------------------------------------------------------------------------------------------------------------------------------------------------------------------------------------------------------------------------------------------------------------------------------------------------------------------------------------------------------------------------------------------------------------------------------------------------|-----------------|
| <b>Additional Information:</b>                                                                                                                                                                                                                                                                                                                                                                                                                                                                                                                          |                 |
| <b>Question</b>                                                                                                                                                                                                                                                                                                                                                                                                                                                                                                                                         | <b>Response</b> |
| Are you submitting this manuscript to a special series or article collection?                                                                                                                                                                                                                                                                                                                                                                                                                                                                           | No              |
| <p><b>Experimental design and statistics</b></p> <p>Full details of the experimental design and statistical methods used should be given in the Methods section, as detailed in our <a href="#">Minimum Standards Reporting Checklist</a>. Information essential to interpreting the data presented should be made available in the figure legends.</p> <p>Have you included all the information requested in your manuscript?</p>                                                                                                                      | Yes             |
| <p><b>Resources</b></p> <p>A description of all resources used, including antibodies, cell lines, animals and software tools, with enough information to allow them to be uniquely identified, should be included in the Methods section. Authors are strongly encouraged to cite <a href="#">Research Resource Identifiers</a> (RRIDs) for antibodies, model organisms and tools, where possible.</p> <p>Have you included the information requested as detailed in our <a href="#">Minimum Standards Reporting Checklist</a>?</p>                     | Yes             |
| <p><b>Availability of data and materials</b></p> <p>All datasets and code on which the conclusions of the paper rely must be either included in your submission or deposited in <a href="#">publicly available repositories</a> (where available and ethically appropriate), referencing such data using a unique identifier in the references and in the “Availability of Data and Materials” section of your manuscript.</p> <p>Have you have met the above requirement as detailed in our <a href="#">Minimum Standards Reporting Checklist</a>?</p> | Yes             |

1  
2  
3  
4 **1 Genome-wide determination of on-target and off-target characteristics for RNA-guided**  
5 **2 DNA Methylation by dCas9 methyltransferases**  
6  
7  
8  
9

10 4 Lin Lin <sup>1,7,§</sup>, Yong Liu <sup>1,§</sup>, Fengping Xu <sup>2,3,4,§</sup>, Jinrong Huang <sup>2,3,4,§</sup>, Tina Fuglsang Daugaard <sup>1</sup>,  
11 5 Trine Skov Petersen <sup>1</sup>, Bettina Hansen <sup>1</sup>, Lingfei Ye <sup>2</sup>, Qing Zhou <sup>2,3</sup>, Fang Fang <sup>2,3</sup>, Ling Yang <sup>2</sup>,  
12 6 <sup>3</sup>, Shengting Li <sup>1,2</sup>, Lasse Fløe <sup>1</sup>, Kristopher Torp Jensen <sup>1</sup>, Ellen Shrock <sup>6</sup>, Fang Chen <sup>2,3,4</sup>,  
13 7 Huanming Yang <sup>2,4,5</sup>, Jian Wang <sup>2,4</sup>, Xin Liu <sup>2,3</sup>, Xun Xu <sup>2,3,\*</sup>, Lars Bolund <sup>1,2,3,7,9,10</sup>, Anders  
14 8 Lade Nielsen <sup>1</sup>, Yonglun Luo <sup>1,2,3,7,8,9,10\*</sup>  
15  
16  
17  
18  
19

20 10 Initials for authors:

21 11 L.L., Y.Liu., F.X., J.H., T.F.D., T.S.P., B.H., L.Y., Q.Z., F.F., L.Y., S.L., L.F., K.T.J., E.S., F.C.,  
22 12 H.Y., J.W., X.L., X.X., L.B., A.L.N., Y.L.  
23  
24

25 14 Affiliations for authors:

- 26 15 1. Department of Biomedicine, Aarhus University, Aarhus, Denmark  
27 16 2. BGI-Shenzhen, Shenzhen 518083, China  
28 17 3. China National GeneBank-Shenzhen, BGI-Research, Shenzhen 518083, China  
29 18 4. Department of Biology, University of Copenhagen, Copenhagen, Denmark  
30 19 5. James D. Watson Institute of Genome Sciences, Hangzhou 310058, China  
31 20 6. Department of Genetics, Harvard Medical School, Boston, MA, USA.  
32 21 7. Danish Regenerative Engineering Alliance for Medicine (DREAM), Department of Biomedicine,  
33 22 Aarhus University, Aarhus, Denmark  
34 23 8. BrainStem - Stem Cell Center of Excellence in Neurology, Copenhagen, Denmark  
35 24 9. BGI-Qingdao, 2877 Tuanjie Road, Sino-German Ecopark, Qingdao, 266000, China  
36 25 10. Lars Bolund Institute of Regenerative Medicine, BGI-Qingdao, China

37 26 §. These authors contributed equally to the study

38 27 \*. All correspondence should be addressed to Xun Xu ([XUXUN@GENOMICS.CN](mailto:XUXUN@GENOMICS.CN)) and Yonglun  
39 28 Luo ([ALUN@BIOMED.AU.DK](mailto:ALUN@BIOMED.AU.DK))  
40  
41  
42

43 30 **Emails:**

44 31 Lin Lin: [lin.lin@biomed.au.dk](mailto:lin.lin@biomed.au.dk)

45 32 Yong Liu: [liuyongbox@gmail.com](mailto:liuyongbox@gmail.com)

46 33 Jinrong Huang: [huangjinrong@genomics.cn](mailto:huangjinrong@genomics.cn)

47 34 Fengping Xu: [xufengping@genomics.cn](mailto:xufengping@genomics.cn)

48 35 Tina Fuglsang Daugaard: [tfm@biomed.au.dk](mailto:tfm@biomed.au.dk)

49 36 Trine Skov Petersen: [trinesp@biomed.au.dk](mailto:trinesp@biomed.au.dk)

50 37 Bettina Hansen: [bhansen@biomed.au.dk](mailto:bhansen@biomed.au.dk)  
51  
52  
53  
54  
55  
56  
57  
58  
59  
60  
61  
62  
63  
64  
65

1  
2  
3  
4 38 Lingfei Ye: [yelingfei@genomics.cn](mailto:yelingfei@genomics.cn)  
5 39 Qing Zhou: [zhouqing1@genomics.cn](mailto:zhouqing1@genomics.cn)  
6 40 Fang Fang: [fangfang@genomics.org.cn](mailto:fangfang@genomics.org.cn)  
7 41 Ling Yang: [yangling2@genomics.cn](mailto:yangling2@genomics.cn)  
8 42 Shengting Li: [lishengting@gmail.com](mailto:lishengting@gmail.com)  
9 43 Lasse Fløe: [lassefloe@gmail.com](mailto:lassefloe@gmail.com)  
10 44 Kristopher Torp Jensen: [kristopher.torp@gmail.com](mailto:kristopher.torp@gmail.com)  
11 45 Ellen Shrock: [ellen\\_shrock@g.harvard.edu](mailto:ellen_shrock@g.harvard.edu)  
12 46 Fang Chen: [fangchen@genomics.cn](mailto:fangchen@genomics.cn)  
13 47 Huanming Yang: [yanghm@genomics.cn](mailto:yanghm@genomics.cn)  
14 48 Jian Wang: [wangjian@genomics.cn](mailto:wangjian@genomics.cn)  
15 49 Xin Liu: [<liuxin@genomics.cn>](mailto:liuxin@genomics.cn)  
16 50 Xun Xu: [xuxun@genomics.cn](mailto:xuxun@genomics.cn)  
17 51 Lars Bolund: [bolund@biomed.au.dk](mailto:bolund@biomed.au.dk)  
18 52 Anders Lade Nielsen: [aln@biomed.au.dk](mailto:aln@biomed.au.dk)  
19 53 Yonglun Luo: [alun@biomed.au.dk](mailto:alun@biomed.au.dk)  
20 54  
21 55  
22  
23  
24  
25  
26  
27  
28  
29  
30  
31  
32  
33  
34  
35  
36  
37  
38  
39  
40  
41  
42  
43  
44  
45  
46  
47  
48  
49  
50  
51  
52  
53  
54  
55  
56  
57  
58  
59  
60  
61  
62  
63  
64  
65

1  
2  
3  
4 56 **1. Abstract**

5  
6 57 **Background**

7 58 Fusion of DNA methyltransferase domains to the nuclease-deficient clustered regularly  
8 59 interspaced short palindromic repeat (CRISPR) associated protein 9 (dCas9) has been used for  
9 60 epigenome editing, but the specificities of these dCas9 methyltransferases have not been fully  
10 61 investigated.  
11  
12

13 62  
14 63 **Findings**

15 64 We generated CRISPR-guided DNA methyltransferases by fusing the catalytic domain of  
16 65 DNMT3A or DNMT3B to the C terminus of the dCas9 protein from *S. pyogenes* and validated its  
17 66 on-target and global off-target characteristics. Using targeted quantitative bisulfite  
18 67 pyrosequencing, we prove that dCas9-BFP-DNMT3A and dCas9-BFP-DNMT3B can efficiently  
19 68 methylate the CpG dinucleotides flanking its target sites at different genomic loci (*uPA* and  
20 69 *TGFBR3*) in human embryonic kidney cells (HEK293T). Furthermore, we conducted whole  
21 70 genome bisulfite sequencing (WGBS) to address the specificity of our dCas9 methyltransferases.  
22 71 WGBS revealed that although dCas9-BFP-DNMT3A and dCas9-BFP-DNMT3B did not cause  
23 72 global methylation changes, a substantial number (over 1000) of off-target differentially  
24 73 methylated regions (DMRs) were identified. The off-target DMRs, which were hypermethylated in  
25 74 cells expressing dCas9 methyltransferase and gRNAs, were predominantly found in promoter  
26 75 regions, 5' untranslated regions, CpG islands, and DNase I hypersensitivity sites, whereas,  
27 76 unexpected hypomethylated off-target DMRs were significantly enriched in repeated sequences.  
28 77 Through chromatin immunoprecipitation with massive parallel DNA sequencing analysis, we  
29 78 further revealed that these off-target DMRs were weakly correlated with dCas9 off-target binding  
30 79 sites. Using qPCR, RNA sequencing and fluorescence reporter cells, we also found that dCas9-  
31 80 BFP-DNMT3A and dCas9-BFP-DNMT3B can mediate transient inhibition of gene expression,  
32 81 which might be caused by dCas9-mediated *de novo* DNA methylation as well as interference with  
33 82 transcription.  
34  
35  
36  
37  
38  
39  
40  
41  
42  
43  
44  
45  
46  
47

48 84 **Conclusion**

49 85 Our results prove that dCas9 methyltransferases cause efficient RNA-guided methylation of  
50 86 specific endogenous CpGs. However, there is significant off-target methylation indicating that  
51 87 further improvements of the specificity of CRISPR-dCas9 based DNA methylation modifiers are  
52 88 required.  
53  
54  
55

56 90 **Key words**

57 91 DNA methylation – CRISPR – Cas9 – DNMT3A – DNMT3B – dCas9 – specificity – off-targets –  
58 92 epigenome editing  
59  
60  
61  
62  
63  
64  
65

1  
2  
3  
4  
5  
6  
7  
8  
9  
10  
11  
12  
13  
14  
15  
16  
17  
18  
19  
20  
21  
22  
23  
24  
25  
26  
27  
28  
29  
30  
31  
32  
33  
34  
35  
36  
37  
38  
39  
40  
41  
42  
43  
44  
45  
46  
47  
48  
49  
50  
51  
52  
53  
54  
55  
56  
57  
58  
59  
60  
61  
62  
63  
64  
65

93 **2. Background**

94 Owing to its simplicity, efficiency and potential for multiplicity, the type II Clustered Regularly  
95 Interspaced Short Palindromic Repeats (CRISPR) and CRISPR-associated protein 9 (Cas9) with  
96 engineered variants have been widely used for genome and epigenome editing in many species  
97 [1-5]. The Cas9 protein is guided to a specific genomic locus containing a protospacer adjacent  
98 motif (PAM) by a small single guide RNA (gRNA), which contains a conserved scaffold sequence  
99 and a programmable guide sequence (typically 20 nt) for base pairing with the taret [1]. By  
100 introducing double mutations (D10A and H840A) in the *S.pyogenes* Cas9 protein (dCas9) to  
101 inactivate its catalytic activity and fusing functional effectors to the C terminus of the dCas9, the  
102 applications of CRISPR/Cas9 are expanded to regulation of gene expression (CRISPRa and  
103 CRISPRi) [6-8], targeted DNA purification [9], visualization of specific gene regions [10], and  
104 acetylation or methylation of chromatin components [11, 12].

105  
106 Genome-wide studies have revealed fundamental functional roles of DNA methylation as well as  
107 associations between aberrant DNA methylation and human diseases including cancer [13, 14].  
108 Methylation of cytosine residues (5mC) in the mammalian genome mainly occurs at CpG  
109 dinucleotides. In promoter regions CpG methylation normally associated with repression of gene  
110 expression. Currently, insights into DNA methylation-associated biological processes are largely  
111 based on correlative data. Methods have been developed to methylate desired gene loci  
112 selectively by fusing programmable DNA binding proteins (zinc finger proteins (ZFs) or  
113 transcription-activator-like effectors (TALEs)) to DNA methyltransferases <sup>3-9</sup>. However, the  
114 laborious generation of ZFs- and TALEs hampers their broader applications. Engineered dCas9  
115 has been harnessed for targeted DNA methylation by fusing dCas9 to the catalytic domain of  
116 mammalian DNA methyltransferases, thus providing an alternative tool for more easily  
117 programmable DNA methylation [15, 16].

118  
119 Currently, genome-wide characterization of the specificity of dCas9-based epigenetic modifiers is  
120 lacking. To gain more insights into the efficiency and specificity of targeted DNA methylation by  
121 CRISPR gRNA-guided dCas9 methyltransferases, we used quantitative bisulfite pyrosequencing,  
122 whole genome bisulfite sequencing, and ChIP-seq to investigate the characteristics of dCas9  
123 methyltransferase-mediated DNA methylation in human cells.

1  
2  
3  
4  
5  
6  
7  
8  
9  
10  
11  
12  
13  
14  
15  
16  
17  
18  
19  
20  
21  
22  
23  
24  
25  
26  
27  
28  
29  
30  
31  
32  
33  
34  
35  
36  
37  
38  
39  
40  
41  
42  
43  
44  
45  
46  
47  
48  
49  
50  
51  
52  
53  
54  
55  
56  
57  
58  
59  
60  
61  
62  
63  
64  
65

### 126 **3. Methods**

#### 127 **3.1 Cell Culture**

128 Human embryonic kidney HEK293T cells (ATCC) were cultured in Dulbecco's modified Eagle's  
129 medium (DMEM, Life Technologies), 10% fetal bovine serum (Sigma), 1% penicillin-streptomycin  
130 (Sigma), 1X GlutaMAX (Life Technologies) at 37 °C, 5% CO<sub>2</sub>.

#### 131 132 **3.2 dCas9 methyltransferases plasmids**

133 The dCas9 coding sequence was derived from pHR-SFFV-dCas9-BFP-KRAB (Addgene ID  
134 46911) (a gift from Stanley Qi & Jonathan Weissman). The catalytic domains of DNMT1,  
135 DNMT3A and DNMT3B were PCR-amplified from pcDNA3/Myc-DNMT1 (Addgene ID 36939),  
136 pcDNA3/Myc-DNMT3A (Addgene ID 35521) and pcDNA3/Myc-DNMT3B1 (Addgene ID 35522) (a  
137 gift from Arthur Riggs), respectively. The DNMT3A (E752A) and DNMT3B (E697A) catalytically  
138 inactivating mutations were introduced by site-directed mutagenesis. All plasmids described in  
139 this study have been validated by Sanger sequencing and will be publically available through  
140 Addgene ([https://www.addgene.org/Yonglun\\_Luo/](https://www.addgene.org/Yonglun_Luo/)) (**Supplementary Table S1**).

#### 141 142 **3.3 CRISPR gRNA design**

143 Based on the observation that dCas9 methyltransferases could efficiently methylate the CpGs  
144 flanking the target sites, a web-based gRNA designing tool (dCas9 methyltransferases **gRNA**  
145 **finder**, <http://luolab.au.dk/views/gRNA.cgi>) was developed to facilitate dCas9  
146 methyltransferase-based gRNA design. All updates regarding the dCas9 methyltransferase  
147 protocol are available on the website (<http://luolab.au.dk/>). All gRNA sequences are listed in  
148 **Supplementary Table S1**.

#### 149 150 **3.4 Transfection and enrichment transfected cells**

151 Unless stated elsewhere, cells were transfected with gRNAs (total 500 ng) and a dCas9  
152 methyltransferase expression vector (500 ng) in six-well plates using X-tremeGENE 9 DNA  
153 transfection reagent (Roche). For single gRNA or pUC19 control transfections, the amount of  
154 plasmid added was equivalent to the total amount of plasmid added for multiple gRNA  
155 transfections. For BFP-based enrichment, cells were harvested 48 hours after transfection, and  
156 dCas9 methyltransferase-expressing cells were sorted by FACS. Briefly, transfected cells were  
157 harvested by trypsinization, washed twice with 2% FBS-PBS, and re-suspended in 500 µL 2%  
158 FBS-PBS. Cells were stained with Propidium Iodide (PI) before sorting. PI negative and BFP  
159 positive or negative cells were sorted with a 4 Laser BD FACS Aria III instrument. All transfections  
160 were performed in at least two independent experiments.

#### 161 162 **3.5 Quantitative PCR (qPCR)**



1  
2  
3  
4  
5  
6  
7  
8  
9  
10  
11  
12  
13  
14  
15  
16  
17  
18  
19  
20  
21  
22  
23  
24  
25  
26  
27  
28  
29  
30  
31  
32  
33  
34  
35  
36  
37  
38  
39  
40  
41  
42  
43  
44  
45  
46  
47  
48  
49  
50  
51  
52  
53  
54  
55  
56  
57  
58  
59  
60  
61  
62  
63  
64  
65

163 Total RNA was extracted from cells with the RNeasy Plus Mini Kit (Qiagen, 74136) according to  
164 the manufacturer's instructions and quantified using a Nanodrop 1000 Spectrophotometer. The  
165 first strand cDNA was synthesized from 100-500 ng total RNA with the iScript cDNA synthesis kit  
166 (Bio-Rad, 170-8891) following the manufacturer's instructions. qPCR was performed in triplicate  
167 for each sample, using the Light Cycler 480 SYBR Green I Master mix (Roche Life Science,  
168 04887352001) and a Light Cycler 480 qPCR machine. Each qPCR reaction contained 1  $\mu$ L cDNA  
169 template (5 times diluted), 7.5  $\mu$ L qPCR Master mix (2X), and 5 pmol of each qPCR primer in a  
170 total volume of 15  $\mu$ L. The following qPCR program was used for *uPA*, *TGFBR3* and *GAPDH*: 1  
171 cycle at 95 °C for 5 min; 45 cycles at 95 °C for 10s, 57 °C for 10s, and 72 °C for 10s during which  
172 the fluorescence signal was measured. The final product was subjected to melting curve analysis.  
173 Primers for qPCR are listed in **Supplementary Table S1**. Relative gene expression was  
174 calculated using the  $2^{-\Delta\Delta CT}$  method by first normalizing to the internal control *GAPDH* ( $\Delta CT$ ) and  
175 then calibrating to the transfection control pUC19 ( $\Delta\Delta CT$ ) [17].  
176

### 177 **3.6 DNA methylation analysis by bisulfite pyrosequencing with PyroMark Q24**

178 Genomic DNA was extracted using the DNeasy Blood & Tissue Kit (Qiagen, 69506) according to  
179 the manufacturer's instructions. A total of 200 ng of genomic DNA was bisulfite treated using the  
180 EpiTect Bisulfite Kit (Qiagen, 59104) according to the manufacturer's instructions. This converts  
181 unmethylated cytosines to uracils. The bisulfite converted DNA was eluted with 20  $\mu$ L elution  
182 buffer provided by the kit. Bisulfite PCR reactions for all genes described in this study were  
183 performed in a 25  $\mu$ L volume containing 0.15  $\mu$ L Hotstar Taq polymerase (5U/ $\mu$ L) (New England  
184 Biolabs, M0495L), 2.5  $\mu$ L 10xStandard buffer, 0.5  $\mu$ L of 10 mM dNTPs, 1.0  $\mu$ L of each primer (10  
185  $\mu$ M) and 1.5  $\mu$ L bisulfite converted genomic DNA. PCR was performed under the following  
186 conditions: 95 °C for 5 min followed by 45 cycles of 94 °C for 30 sec, 58 °C for 1 min, and 72 °C  
187 for 45 sec, and, finally, by 72 °C for 7 min. 4  $\mu$ L PCR product was checked by gel electrophoresis.  
188 Pyrosequencing was performed with the PyroMark Q24 Advanced Reagents (Qiagen, 970922)  
189 using 20  $\mu$ L PCR product from the bisulfite treated DNA and 20  $\mu$ L sequencing primer (0.375  $\mu$ M)  
190 according to the PyroMark Q24 CpG protocol. The general degree of cytosine methylation was  
191 determined by pyrosequencing of the bisulfite converted genomic DNA, using the PyroMark Q24  
192 Advanced system (Qiagen).  
193

### 194 **3.7 DNA methylation analysis by bisulfite Sanger sequencing**

195 Bisulfite converted DNA was used as template for PCR amplifications with the BS specific PCR  
196 primers listed in **Supplementary Table S1**, using the DreamTaq DNA Polymerase (Life  
197 Technologies, EP0701). PCR products were gel purified, sub-cloned in a TA-cloning vector (Life  
198 Technologies, 450030) and transformed into chemically competent *E.coli* cells. Cell clones were

1  
2  
3  
4 199 manually picked, sub-cultured in 250 ul LB medium overnight, lysed, subjected to Sanger  
5 200 sequencing and analyzed by BISMA [18].  
6  
7 201

### 8 202 **3.8 Fluorescence reporter cell assay**

9  
10 203 Five stable fluorescence reporter cell clones were established by randomly inserting various  
11 204 copies of the CMV promoter-driven mCherry expression cassette into HEK293T (pLV-mCherry  
12 205 was a gift from Pantelis Tsoulfas, Addgene ID 36084). Cells were transfected separately with  
13 206 each dCas9 methyltransferase expression vector (50 ng) and gRNAs (total 50 ng) in 24-well  
14 207 plates. One-third of the transfected cells were seeded to a new plate every 2-3 days and the  
15 208 remainder used for flow cytometry analysis. Median mCherry intensity was measured with the BD  
16 209 LSRFortessa™ cell analyzer (FACS CORE facility, Aarhus University). Identical instrument  
17 210 settings and control beads were applied during the time course experiment to ensure valid  
18 211 comparison across different time points. 20,000 events were recorded for each sample. Flow  
19 212 cytometry data were analyzed using the Flowjo software.  
20  
21 213

### 22 214 **3.9 Immunostaining**

23 215 48 hours after transfection, cells were fixed with freshly-made 4% PFA for 15 min at room  
24 216 temperature, followed by three washes with DPBS. Cells were permeabilized in 0.3% Triton X-  
25 217 100 DPBS for 10 min and blocked in 5% goat serum-DPBS for 30 min. Cells were incubated with  
26 218 a primary rabbit anti-HA-tag antibody (C29F4, Cell Signaling 3724, 1:1000) overnight, followed by  
27 219 secondary antibody staining with Alexa Fluor 555 donkey anti-rabbit IgG (A-31572, Life  
28 220 technologies) at room temperature for 2 hours. Images were obtained with a confocal microscope  
29 221 (LSM710, Carl Zeiss).  
30  
31 222

### 32 223 **3.10 Southern blot analysis**

33 224 Genomic DNA (15 µg) was digested with *EcoRI* restriction enzyme overnight and then analyzed  
34 225 by gel electrophoresis with vacuum blotting. Primers for generating the mCherry probe are listed  
35 226 in **Supplementary Table S1**. Probe labelling was performed using the Prime-It II Random Primer  
36 227 Labeling Kit according to the manufacturer's instructions. Pre-hybridization and hybridization  
37 228 steps were carried out at 42 °C. Excess probe was washed from the membrane with SSC buffer,  
38 229 and the hybridization pattern was visualized on X-ray film by autoradiography.  
39  
40 230

### 41 231 **3.11 RNA sequencing**

42 232 Integrity and quantity of extracted RNA was evaluated with an Agilent 2100 Bioanalyzer  
43 233 according to the manufacturer's instructions. After DNase I treatment, mRNA was isolated with  
44 234 Oligo (dT) magnetic beads. Fragmentation buffer was added to generate short fragments of  
45 235 mRNA. cDNA was synthesized using the mRNA fragments as templates, resolved with EB buffer  
46  
47  
48  
49  
50  
51  
52  
53  
54  
55  
56  
57  
58  
59  
60  
61  
62  
63  
64  
65

1  
2  
3  
4  
5  
6  
7  
8  
9  
10  
11  
12  
13  
14  
15  
16  
17  
18  
19  
20  
21  
22  
23  
24  
25  
26  
27  
28  
29  
30  
31  
32  
33  
34  
35  
36  
37  
38  
39  
40  
41  
42  
43  
44  
45  
46  
47  
48  
49  
50  
51  
52  
53  
54  
55  
56  
57  
58  
59  
60  
61  
62  
63  
64  
65

236 for end repair and ligated with adaptors. After size selection and purification by agarose gel  
237 electrophoresis, cDNA with sizes of approximately 240 bp were used for PCR amplification (12  
238 cycles) and library construction. Libraries were sequenced on an Ion Proton platform (>30 million  
239 reads per sample). Sequencing reads that contained low quality, adaptor, and/or short (< 30nt)  
240 read sequences were filtered out before mapping. tmap was used to align the clean reads to the  
241 hg19 UCSC RefSeq (RNA sequences, GRCh37). No more than 3 mismatches were allowed in  
242 the alignment. Gene expression levels were calculated by transforming uniquely mapped  
243 transcript reads to TPM (transcript per million) [19]. Differentially expressed genes were defined  
244 as genes with a Benjamini-Hochberg-adjusted P value (FDR)  $\leq 0.001$  and fold change  $\geq 2$   
245 compared to pUC19 control.

246  
247 **3.12 ChIP-seq**

248 HEK293T cells were transfected with dCas9 methyltransferase and five *uPA* gRNAs (triplicates).  
249 48 hours after transfection, transfected cells were subjected to ChIP with a commercially  
250 available kit CHIP-IT Express Enzymatic (53009-AF, ActivMotif, distributed by Nordic Biolabs) and  
251 an anti-HA tag antibody (C29F4, Cell Signaling) according to the manufacturer's instructions.  
252 Next generation sequencing libraries were prepared for Chip and input samples. SE50  
253 sequencing was performed on Illumina HiSeq2500. Clean reads were mapped to human genome  
254 hg19 using SOAP2 with the parameter "-p 4 -v 2 -s 35". Unique mapping reads was sampled  
255 randomly and equally (62723057 reads). Peaks were called using MACS with P value 1e-3  
256 compared to the input samples. Common peaks found in the triplicates were selected.  
257 Furthermore, ChIP peaks loated in repeat sequences and rDNA were removed. Sequence motifs  
258 enriched within 70 bp of peak summits were identified using MEME-ChIP.

259  
260 **3.13 WGBS library preparation and sequencing**

261 Genomic DNA was fragmented by sonication to a mean size of 250bp using a Bioruptor  
262 (Diagenode, Belgium), followed by the blunt-ending, dA addition to 3'-end, and adaptor ligation  
263 using the TruSeq Sample Preparation kit (Illumina Inc.) according to the manufacturer's  
264 instructions. Then, bisulfite conversion was conducted with the EZ DNA Methylation-Gold kit  
265 (ZYMO). The fragments with different insert size were excised from the same lane of a 2% TAE  
266 agarose gel. Products were purified by using QIAquick Gel Extraction kit (Qiagen) and amplified  
267 by 18 PCR cycles. The library quality was monitored using the Agilent 2100 BioAnalyzer (Agilent)  
268 and the concentration of the library was determined by quantitative PCR. Finally, the WGBS  
269 libraries were paired-end sequenced on Illumina HiSeq X Ten.  
270 After filtering out adaptor and low-quality reads, a total of 953.7Gb 150bp paired-end clean data  
271 was generated. An average of 106Gb clean data was obtained for each sample. Clean reads  
272 were aligned to the human reference genome (hg19) by BSMAP(v2.74) with the parameter "-u -v

1  
2  
3  
4 273 5 -z 33 -p 6 -n 0 -w 20 -s 16 -r 0 -f 10 -L 140" [20]. Only the CpG sites with read depths  $\geq 4$  were  
5 274 taken into consideration for DNA methylation level calculation. The 48502 bp lambda DNA  
6 275 genome was used as an extra reference for calculating the bisulphite conversion rate. Nearly  
7 276 complete ( $>99\%$ ) bisulfite conversion was documented in all libraries. For repeat WGBS  
8 277 experiment, HEK293T cells were transfected with pUC19 as controls or transfected with dCas9-  
9 278 BFP-DNMT3A and uPA gRNAs. Transfections were conducted in triplicates. Genomic DNA were  
10 279 purified from all cells 48 hours after transfection without BFP-based FACS enrichment of  
11 280 transfected cells. WGBS library construction and sequencing were conducted as above but  
12 281 sequenced with less depth, of 10-15X coverage.  
13  
14  
15  
16  
17  
18

### 19 283 **3.14 Identification of differentially methylated regions (DMRs) and attempts to exclude** 20 284 **stochastic DMRs unrelated to the dCas9 methyltransferase treatment**

21 285 The bioconductor package DSS was used to identify DMRs with the parameter "delta  $\geq 0.1$ ,  
22 286 pvalue  $\leq 0.01$ , CpG sites  $\geq 3$ , DMR length  $\geq 10$  bp, smoothing window 100 bp". Since  
23 287 expressing high amount of dCas9-BFP-DNMT3A and either uPA or TGFBR3 gRNAs caused the  
24 288 highest *de novo* on-target methylation, we reasoned that the authentic off-target DMRs should be  
25 289 detected in these two comparisons. We first compared group 1 (dCas9-BFP-DNMT3A (500 ng) +  
26 290 uPA gRNAs (500 ng)) or group 3 (dCas9-BFP-DNMT3A (500 ng) + TGFBR3 gRNAs (500 ng)) to  
27 291 group 9 (pUC19 control).  
28  
29  
30  
31  
32

33 292  
34 293 Based on the observation of (1) dose- and gRNA-dependent *de novo* methylation of *uPA*,  
35 294 *TGFBR3* and *GAPDH* by dCas9 methyltransferases and (2) dCas9-BFP-DNMT3A being more  
36 295 efficient than dCas9-BFP-DNMT3B, we reasoned that the authentic DMRs caused by dCas9  
37 296 methyltransferases and uPA gRNAs should have a methylation pattern as described below:  
38  
39  
40

#### 41 297 42 298 **Hypermethylated DMRs by dCas9 methyltransferases and uPA gRNAs should meet:**

43 299 % mCpG:

44 300 **(1) group 9** (pUC19)  $\leq$  **group 5** (dCas9-DNMT-3A only (500 ng))  $\leq$  **group 7** (dCas9-DNMT-3A  
45 301 (50 ng) + uPA gRNAs (50 ng))  $\leq$  **group 1** (dCas9-DNMT-3A (500 ng) + uPA gRNAs (500 ng)).

46 302 **(2) group 2** (dCas9-DNMT-3B (500 ng) + uPA gRNAs (500 ng))  $\leq$  **group 1** (dCas9-DNMT-3A  
47 303 (500 ng) + uPA gRNAs (500 ng))

48 304 **(3) group 6** (dCas9-DNMT-3B (500 ng))  $\leq$  **group 2** (dCas9-DNMT-3B (500 ng) + uPA gRNAs  
49 305 (500 ng))  
50

#### 51 306 52 307 **Hypomethylated DMRs by dCas9 methyltransferases and uPA gRNAs should meet:**

53 308 % mCpG:  
54  
55  
56  
57  
58  
59  
60  
61  
62  
63  
64  
65

1  
2  
3  
4  
5  
6  
7  
8  
9  
10  
11  
12  
13  
14  
15  
16  
17  
18  
19  
20  
21  
22  
23  
24  
25  
26  
27  
28  
29  
30  
31  
32  
33  
34  
35  
36  
37  
38  
39  
40  
41  
42  
43  
44  
45  
46  
47  
48  
49  
50  
51  
52  
53  
54  
55  
56  
57  
58  
59  
60  
61  
62  
63  
64  
65

309 **(1) group 9** (pUC19) >= **group 5** (dCas9-DNMT-3A only (500 ng)) >= **group 7** (dCas9-DNMT-3A  
310 (50 ng) + uPA gRNAs (50 ng)) >= **group 1** (dCas9-DNMT-3A (500 ng) + uPA gRNAs (500 ng)).

311 **(2) group 2** (dCas9-DNMT-3B (500 ng) + uPA gRNAs (500 ng)) >= **group 1** (dCas9-DNMT-3A  
312 (500 ng) + uPA gRNAs (500 ng))

313 **(3) group 6** (dCas9-DNMT-3B (500 ng)) >= **group 2** (dCas9-DNMT-3B (500 ng) + uPA gRNAs  
314 (500 ng))

315

316 Similarly, the authentic DMRs caused by dCas9 methyltransferases and *TGFBR3* gRNAs should  
317 have a methylation pattern as described below:

318

319 **Hypermethylated DMRs by dCas9 methyltransferases and TGFBR3 gRNAs should meet:**

320 % mCpG:

321 **(1) group 9** (pUC19) =< **group 5** (dCas9-DNMT-3A only (500 ng)) =< **group 8** (dCas9-DNMT-3A  
322 (50 ng) + TGFBR3 gRNAs (50 ng)) =< **group 3** (dCas9-DNMT-3A (500 ng) + TGFBR3 gRNAs  
323 (500 ng)).

324 **(2) group 4** (dCas9-DNMT-3B (500 ng) + TGFBR3 gRNAs (500 ng)) =< **group 3** (dCas9-DNMT-  
325 3A (500 ng) + TGFBR3 gRNAs (500 ng))

326 **(3) group 6** (dCas9-DNMT-3B (500 ng)) =< **group 4** (dCas9-DNMT-3B (500 ng) + TGFBR3  
327 gRNAs (500 ng))

328

329 **Hypomethylated DMRs by dCas9 methyltransferases and TGFBR3 gRNAs should meet:**

330 % mCpG:

331 **(1) group 9** (pUC19) >= **group 5** (dCas9-DNMT-3A only (500 ng)) >= **group 8** (dCas9-DNMT-3A  
332 (50 ng) + TGFBR3 gRNAs (50 ng)) >= **group 3** (dCas9-DNMT-3A (500 ng) + TGFBR3 gRNAs  
333 (500 ng)).

334 **(2) group 4** (dCas9-DNMT-3B (500 ng) + TGFBR3 gRNAs (500 ng)) >= **group 3** (dCas9-DNMT-  
335 3A (500 ng) + TGFBR3 gRNAs (500 ng))

336 **(3) group 6** (dCas9-DNMT-3B (500 ng)) >= **group 4** (dCas9-DNMT-3B (500 ng) + TGFBR3  
337 gRNAs (500 ng))

338

339 We applied this methylation level-based filtering criteria to further remove potential stochastic  
340 DMRs. The remaining DMRs were subjected to all analyses as described in this study.

341

342 **3.15 Analysis of 5nt-SEED-NGG motif density**

343 The 5nt-SEED-NGG density was calculated by counting the frequency of the sequence  
344 containing the 5 nt SEED sequences preceding a NGG site on either DNA strand. The PAM  
345 density was calculated by counting the frequency of PAM sites (NGG) on either DNA strand. The

1  
2  
3  
4  
5  
6  
7  
8  
9  
10  
11  
12  
13  
14  
15  
16  
17  
18  
19  
20  
21  
22  
23  
24  
25  
26  
27  
28  
29  
30  
31  
32  
33  
34  
35  
36  
37  
38  
39  
40  
41  
42  
43  
44  
45  
46  
47  
48  
49  
50  
51  
52  
53  
54  
55  
56  
57  
58  
59  
60  
61  
62  
63  
64  
65

346 median density with standard deviation is shown in the plots. Fisher’s exact test was conducted to  
347 compare densities between different sequence datasets.

348

349 **3.16 Statistics**

350 All values in this study were presented as mean ± standard deviation. The one-way Analysis of  
351 Variance (ANOVA) with Bonferroni multiple testing, linear regression, Wilcoxon matched-pairs  
352 signed-rank test, Fisher’s exact test and Benjamini-Hochberg–adjusted P value were used for  
353 statistical analysis. A p-value < 0.05 was considered statistically significant.

354

355

## 356 4 Results

### 357 4.1 On-target DNA methylation by dCas9 methyltransferases: dCas9-BFP-DNMT3A and 358 dCas9-BFP-DNMT3B

359 In mammalian cells, DNA methylation is established by *de novo* DNA methyltransferases  
360 (DNMT3A and DNMT3B), and maintained upon replication by DNMT1 [21]. Using a similar  
361 approach as Vojta *et al.* and McDonald *et al.* [15, 16]., we fused DNMT1 catalytic domain,  
362 DNMT3A catalytic domain, DNMT3B catalytic domain or EGFP to the C-terminal end of dCas9  
363 with a blue fluorescent protein (BFP) and a triple tandem repeated flexible linker (3XG4S, Gly-  
364 Gly-Gly-Gly-Ser) (**Fig. 1a and Supplementary Fig. S1a**). Enrichment of cells expressing the  
365 fusion dCas9 methyltransferases were validated by BFP-based Fluorescence Activated Cell  
366 Sorting (FACS) (**Supplementary Fig. S1b**) and immunofluorescence staining using anti-HA tag  
367 antibody (**Supplementary Fig. S1c**).

368  
369 To validate that dCas9 methyltransferases can methylate endogenous CpGs, the dCas9  
370 methyltransferases were first targeted by five gRNAs (*uPA* gRNA T1 to T5, **Fig. 1b**) to the *uPA*  
371 promoter, which contains a dense CpG island that is hypomethylated in human cancer cells [22].  
372 HEK293T cells were transfected with *uPA* gRNAs and individual dCas9 fusion expression vectors.  
373 Following BFP-based FACS enrichment of transfected cells, the percentage of methylated CpGs  
374 (mCpGs) at individual CpG sites in the *uPA* promoter (*uPA*-MR1 and *uPA*-MR2 genomic regions)  
375 was quantified by bisulfite pyrosequencing (**Fig. 1c**). Compared to the pUC19 control, cells  
376 expressing *uPA* gRNAs and dCas9-BFP-DNMT3A or dCas9-BFP-DNMT3B, but not dCas9-BFP-  
377 DNMT1 or dCas9-BFP-EGFP, had significantly higher mCpG levels (*P* value < 0.01, ANOVA test).  
378 This is consistent with previous reports showing that the C-terminal catalytic domains of DNMT3A  
379 and DNMT3B, but not DNMT1, are active [23, 24]. The CpGs most efficiently *de novo* methylated  
380 were located 10-50 bp upstream and downstream of the gRNA target sites. CpGs located in the  
381 gRNA binding sites were not methylated by the dCas9 methyltransferases, most likely because  
382 CRISPR/dCas9 binding blocks the interaction of the methyltransferase domain with the CpGs  
383 (**Fig. 1c**). *De novo* methylation by dCas9-BFP-DNMT3A and gRNAs was further validated by  
384 bisulfite Sanger sequencing (**Supplementary Fig. S1d**).

385  
386 To investigate dCas9 methyltransferase-mediated methylation of another genomic locus, we  
387 generated three gRNAs targeting the transforming growth factor beta receptor 3 (*TGFBR3*)  
388 promoter. Similar *de novo* methylation effects were observed for dCas9-BFP-DNMT3A or dCas9-  
389 BFP-DNMT3B with *TGFBR3* gRNAs (**Fig. 1d-g; Supplementary Fig. S2**). Our results collectively  
390 reveal that fusion of dCas9 to the catalytic domain of DNMT3A/3B can mediate targeted *de novo*  
391 DNA methylation.

## 393 4.2 Off-target methylation by dCas9 methyltransferases

394 Since high frequency off-target mutagenesis has been observed in previous applications of  
395 CRISPR-Cas9 [25], we investigated the specificity of dCas9 methyltransferases. For this purpose,  
396 we repeated the experiment with two additional controls: (1) cells expressing dCas9-BFP-  
397 DNMT3A or dCas9-BFP-DNMT3B only; (2) cells expressing dCas9-BFP-DNMT3A or dCas9-  
398 BFP-DNMT3B and three scrambled gRNAs (gRNAs targeting the CMV promoter). We found that  
399 expression of dCas9 methyltransferases and scrambled gRNAs could cause some unspecific *de*  
400 *novo* methylation of the *uPA* promoter, but at much lower levels compared to that obtained for  
401 *uPA* gRNAs (**Supplementary Fig. S3**). A slightly increased *uPA* promoter methylation, although  
402 not significant, was also observed in cells expressing dCas9 methyltransferase only  
403 (**Supplementary Fig. S3**).

404  
405 To further assess the off-target methylation, we investigated three genomic regions with various  
406 sequence similarities to the *uPA* gRNA target sites: *SH2D3C* (3 mismatches, **Supplementary Fig.**  
407 **S4a**), *FAM221A* (3 mismatches, **Supplementary Fig. S4b**), and *GAPDH* promoter (9  
408 mismatches, **Fig. 2a**). We did not observe significant changes in CpG methylation at *SH2D3C*  
409 and *FAM221A* genomic sites. Surprisingly, several CpG sites in the *GAPDH* promoter were  
410 significantly methylated in cells expressing dCas9-BFP-DNMT3A and *uPA*, *TGFBR3*, or  
411 scrambled (CMV) gRNAs (**Fig. 2b-c**). The same was observed, but to a lesser extent, in cells  
412 expressing dCas9-BFP-DNMT3B (**Fig. 2d-e**). This effect was less prominent in cells expressing  
413 dCas9 methyltransferase only, indicating that unspecific methylation of the *GAPDH* promoter is  
414 RNA-guided. Our results collectively reveal the existence of site dependent off-target methylation  
415 by dCas9 methyltransferases.

## 416 417 4.3 Effects of DNMT3A/3B catalytic activity and dCas9 methyltransferase expression level 418 on on-target and off-target DNA methylation

419 *De novo* methylation by dCas9 methyltransferases could be mediated either by the catalytic  
420 activity of DNMT3A and DNMT3B, or by the recruitment of additional DNA methylation enzymes  
421 to the binding sites facilitated by protein interactions. To elucidate the mechanism of on-target  
422 and off-target DNA methylation, we introduced the E752A and E697A catalytically inactivating  
423 mutations [26] in the DNMT3A and DNMT3B catalytic domains, respectively. To investigate the  
424 effect of dCas9 methyltransferase expression levels on on-target and off-target DNA methylation,  
425 cells were sorted into four populations based on BFP signal intensity, a marker of dCas9  
426 methyltransferase expression level: 1. very low: +; 2. low: ++; 3. medium: +++; and 4. high: ++++  
427 (**Fig. 3a**). Bisulfite pyrosequencing analysis of the *uPA* (**Fig. 3b**) and *TGFBR3* (**Fig. 3c**,  
428 **Supplementary Fig. S5**) promoters revealed that only dCas9 methyltransferases but not dCas9  
429 methyltransferase catalytic mutants cause dose-dependent *de novo* methylation, suggesting that



1  
2  
3  
4 430 *de novo* on-target methylation by dCas9 methyltransferases is mediated by the catalytic activity of  
5 431 DNMT3A and DNMT3B.

6  
7 432

8 433 We next investigated the effect of dCas9 methyltransferase expression level on off-target  
9 434 methylation by analyzing the *GAPDH* promoter methylation in the FACS-sorted cells with different  
10 435 BFP signal intensity (+, ++, +++, and ++++). Consistent with previous results, co-expression of  
11 436 dCas9-BFP-DNMT3A or dCas9-BFP-DNMT3B (**Fig. 4a, b**) with either *uPA* or *TGFBR3* gRNAs  
12 437 significantly increased *de novo* methylation of *GAPDH* promoter CpGs compared to cells  
13 438 expressing dCas9 methyltransferase without gRNAs or pUC19. Furthermore, titrating dCas9  
14 439 methyltransferase expression levels decreased unspecific methylation of the *GAPDH* promoter  
15 440 (**Fig. 4a, b**). Similarly, methyltransferase catalytic mutants do not cause *de novo* methylation of  
16 441 *GAPDH*. Since *de novo* methylation of gRNA-targeted genes was also decreased by dCas9  
17 442 methyltransferase titration (**Fig. 3**), our results collectively suggest that altering dCas9  
18 443 methyltransferase expression levels cannot efficiently reduce unspecific methylation relative to  
19 444 targeted methylation.

20 445

21 446 To investigate global methylation levels, repetitive *LINE1* elements were investigated as they  
22 447 represent a surrogate marker for global DNA methylation [27]. We measured the *LINE1* 5'UTR  
23 448 methylation by bisulfite pyrosequencing which revealed that expression of dCas9-BFP-DNMT3A  
24 449 and *uPA* gRNAs did not result in significant *LINE1* methylation changes (**Fig. 4c**).

25 450

#### 26 451 **4.4 Genome-wide bisulfite sequencing revealed off-target methylation by dCas9** 27 452 **methyltransferases**

28 453 Prompted by the unspecific methylation of *GAPDH* promoter by dCas9 methyltransferases, we  
29 454 investigated the genome-wide off-target methylation characteristics by CRISPR dCas9  
30 455 methyltransferases using whole-genome bisulfite sequencing (WGBS). WGBS were conducted in  
31 456 HEK293T cells transfected with (i) pUC19 (control), (ii) dCas9-BFP-DNMT3A or dCas9-BFP-  
32 457 DNMT3B alone, and (iii) dCas9-BFP-DNMT3A or dCas9-BFP-DNMT3B with either *uPA* or  
33 458 *TGFBR3* gRNAs with two difference doses (50 ng or 500 ng) (**Supplementary Fig. S6a**). Using  
34 459 the Illumina HiSeq X platform, we generated over 100 giga bases (Gb) of clean data for each  
35 460 sample (more than 30X coverage with a 99.5% bisulfite conversion rate). This allowed us to  
36 461 analyze the methylation pattern at single-base pair resolution. Since mainly CpG dinucleotides  
37 462 are subject to methylation in HEK293T cells (**Supplementary Fig. S6b**), all following analyses  
38 463 are based on CpG methylation in the entire genome (approximately 40,000,000 CpG sites). We  
39 464 firstly examined *uPA*, *TGFBR3* and *GAPDH* promoter methylation as revealed by WGBS in all  
40 465 nine groups. WGBS confirmed that the *uPA* and *TGFBR3* gRNAs could target dCas9-BFP-  
41 466 DNMT3A or dCas9-BFP-DNMT3B to the *uPA* and *TGFBR3* loci and methylate CpGs flanking the

1  
2  
3  
4 467 gRNA binding sites in a dose- and gRNA-dependent manner (**Fig. 5**). Furthermore, our WGBS  
5 468 data revealed that some dCas9 methyltransferase-mediated *de novo* methylation of *uPA*,  
6 469 *TGFBR3* and *GAPDH* (*off-target*) promoters occurred in a broad region surrounding the gRNA  
7  
8 470 binding site.  
9

10 471  
11 472 Next, we analyzed the global DNA methylation profile. Consistent with the *LINE1* assay (**Fig. 3c**),  
12 473 expression of dCas9 methyltransferase alone or together with gRNAs was not associated with  
13 474 global methylation changes (**Supplementary Fig. S6c, d**). Since we have only one replicate per  
14 475 group and stochastic methylations frequently occur in cancer cells during cultivation [28], we  
15 476 analyzed the data with DSS-single (a method developed by Wu et al. for detecting differentially  
16 477 methylated regions (DMRs) from WGBS data without replicates [29]) to identify differentially  
17 478 methylated regions (DMRs) caused by dCas9 methyltransferase and gRNAs. Firstly, we  
18 479 compared cells transfected with dCas9 methyltransferases with or without gRNAs to control cells  
19 480 (transfected with pUC19 control plasmid). Over 10,000 hyper or hypo DMRs were identified by  
20 481 DSS-single (**Supplementary Fig. S7**). Secondly, based on the observation that: **(1)** there is  
21 482 dose- and gRNA-dependency of *uPA*, *TGFBR3* and *GAPDH* methylation by dCas9  
22 483 methyltransferase and **(2)** dCas9-BFP-DNMT3A is more efficient than dCas9-BFP-DNMT3B, we  
23 484 applied a stringent filtering step to remove potentially stochastic DMRs. Following this filtering, we  
24 485 identified over 1000 DMRs resulting from dCas9 methyltransferase together with either *uPA*  
25 486 gRNAs (hypermethylated DMRs (hyper-DMRs) = 3671; hypomethylated DMRs (hypo-DMRs) =  
26 487 1807) or *TGFBR3* gRNAs (hyper-DMRs = 2267; hypo-DMRs = 1662) (**Supplementary Table S2-**  
27 488 **S5**). These DMRs were on average 63-81 bp and contained an average of 5-9 CpGs  
28 489 (**Supplementary Fig. S8**). The average methylation levels of these hyper/hypo-DMRs differ  
29 490 significantly between pUC19 control cells, cells expressing dCas9 methyltransferase only, cells  
30 491 expressing low amounts of dCas9 methyltransferase and gRNAs, and cells expressing high  
31 492 amounts of dCas9 methyltransferase and gRNAs (**Fig. 6a, Supplementary Fig. S9a**). Only a  
32 493 very small portion of the DMRs (hyper-DMRs = 192; hypo-DMRs = 81) were commonly found  
33 494 among DMRs caused by dCas9 methyltransferase and *uPA* compared to *TGFBR3* gRNAs (**Fig.**  
34 495 **6b**), suggesting that the majority of the off-target DMRs are RNA-guided. Taken together, our  
35 496 WGBS result revealed that expression of dCas9 methyltransferases together with gRNAs can  
36 497 cause substantial off-target methylation.  
37  
38  
39  
40  
41  
42  
43  
44  
45  
46  
47  
48  
49  
50  
51  
52

#### 53 499 **4.5 Characteristics of dCas9 methyltransferase off-targets**

54 500 To better describe the characteristics of dCas9 methyltransferase off-targets, we stratified hyper-  
55 501 and hypo-DMRs according to their localization in particular types of genomic regions, including  
56 502 promoters, coding sequences (CDS), introns, 5' untranslated regions (5-UTR), 3-UTR, CpG  
57 503 islands (CGI), CGI shores, Alu sequences, LINE1 (L1) sequences, and LINE2 (L2) sequences.  
58  
59  
60  
61  
62  
63  
64  
65

1  
2  
3  
4  
5  
6  
7  
8  
9  
10  
11  
12  
13  
14  
15  
16  
17  
18  
19  
20  
21  
22  
23  
24  
25  
26  
27  
28  
29  
30  
31  
32  
33  
34  
35  
36  
37  
38  
39  
40  
41  
42  
43  
44  
45  
46  
47  
48  
49  
50  
51  
52  
53  
54  
55  
56  
57  
58  
59  
60  
61  
62  
63  
64  
65

504 Our results showed that hyper-DMRs were predominantly enriched in promoters, 5-UTR and CGI,  
505 whereas hypo-DMRs were enriched in repeated sequences Alu and LINE1 (**Fig. 6c-d,**  
506 **Supplementary Fig. S9b-c**). Consistent with this finding, a metaplot of average methylation  
507 levels for all genes before the DSS-single call also showed that transcription start site flanking  
508 regions (overlapping with promoters and 5'UTR) were hypermethylated in cells expressing dCas9  
509 methyltransferase and gRNAs (**Supplementary Fig. 10**).

510  
511 Since dCas9 preferentially binds open chromatin regions [30], we further analyzed DNase I  
512 hypersensitivity regions based on ENCODE data from HEK293T cells (GEO#: GSM1008573) and  
513 quantified the average methylation level in DNase I hypersensitivity sites (DHS) (as an indication  
514 of sites with an open chromatin state). The DHS flanking regions (1 kb upstream and downstream)  
515 were used as a control. Compared to cells transfected with pUC19, cells expressing dCas9  
516 methyltransferase and gRNAs had significantly higher methylation levels in the DHS sites (*P*  
517 value < 0.05; Wilcoxon matched-pairs signed-rank test) (**Fig. 6e, Supplementary Fig. 9d**).  
518 Furthermore, only hyper-DMRs but not hypo-DMRs were significantly enriched in DHS (*P* value <  
519 1e-300, Fisher's exact test, **Fig. 6f-g** and **Supplementary Fig. 9e-f**), which collectively suggests  
520 that open chromatin regions are prone to unspecific methylation by dCas9 methyltransferase and  
521 gRNAs.

522  
523 Previous studies have discovered that complementary base pairing between gRNA guide  
524 sequences and the PAM-proximal 5nt region (5ntSEED-PAM) is crucial for off-target binding [30,  
525 31]. We also assessed the density of individual gRNA 5ntSEED-PAM sequence (5'-NNNNNNGG-  
526 3') in the hyper- and hypo-DMRs. For each DMR, we included the 100-bp flanking sequences  
527 when calculating the presence of 5ntSEED-PAM sequence density. This is based on the previous  
528 observation that dCas9 methyltransferases methylate CpGs flanking the gRNA binding site. We  
529 consistently observed significant enrichment of 5ntSEED-PAM sequences for all gRNAs in the  
530 hyper-DMRs but not hypo-DMRs (**Fig. 6h, Supplementary Fig. 9g**). Taken together, this shows  
531 that, if guided by gRNAs, dCas9 methyltransferases can cause substantial off-target methylation  
532 of genomic regions with open chromatin accessibility i.e. promoters and 5'UTR, as well as CpG  
533 islands. Our finding between the off-target methylation and the chromatin accessibility is also  
534 consistent with our recent discovery that CRISPR/Cas9 cleaves more efficiently in euchromatin  
535 than heterochromatin regions [32].

536  
537 **4.6 dCas9 methyltransferase-mediated hypermethylated DMRs are weakly correlated with**  
538 **off-target binding**

539 To further investigate the association between dCas9 methyltransferase off-target methylation  
540 and dCas9 off-target DNA binding, we studied off-target binding sites in HEK293T cells

1  
2  
3  
4 541 expressing dCas9 methyltransferase and *uPA* gRNAs using ChIP-seq. Using pair-wise  
5 542 comparison as previous approach for dCas9 [31], 805 enriched peaks (P value < 0.001,  
6 543 **Supplementary Table S6**) were identified. These ChIP peaks were scattered throughout the  
7  
8 544 genome and significantly enriched in DHS genomic regions (**Fig. 7a, b**). Using MEME motif  
9 545 scanning of ChIP peaks [33], we identified the most significant motif GGGAGAGGGAGNGG (P =  
10 546 1.0e-593). This motif is identical to the 11-bp seed sequences of *uPA* gRNA T2  
11 547 (GAGCCGGGCGGGAGAGGGAG(GGG)) and the PAM (NGG) site (**Fig. 7c**), suggesting that T2  
12 548 is dominant compared to other *uPA* gRNAs in mediating off-target binding. Analysis of 5ntSEED-  
13 549 PAM sequence density further confirmed that *uPA* T2 binding sites were over-represented in the  
14 550 ChIP peaks (**Fig. 7d**). A previous study has shown that the choice of gRNAs has a great effect on  
15 551 dCas9 off-target binding [31]. The *uPA* gRNA T2 is highly G-rich or AG-rich in the seed region.  
16 552 This can potentially be the cause of most of the off-target activities. This could be the explanation  
17 553 of why we have found 40 times more off-target binding sites compared to the study by Liu et al.  
18 554 [34].  
19  
20  
21  
22  
23  
24  
25  
26

27 555  
28 556 We next analyzed the correlation between the ChIP peaks and the *uPA* DMRs (including the  
29 557 flanking 100 bp of each DMR). There is a significantly increased overlap between ChIP peaks  
30 558 and *uPA* hyper-DMRs (p = 0.006, Fisher's exact test) but not *uPA* hypo-DMRs (p = 1, Fisher's  
31 559 exact test) (**Fig. 7e**). However, the percentage of *uPA* hyper-DMRs overlaps with ChIP peaks is  
32 560 still very low (11 out of 3671 hyper DMRs, 0.3%). Since the average methylation level of all ChIP  
33 561 peak regions exceeds 60% (**Supplementary Fig. 11**), and this may partially explain why there is  
34 562 a low correlation between ChIP peaks and DMRs given potential functional difficulty in further  
35 563 increasing the methylation level. Furthermore, ChIP-seq only identified sites to which the dCas9  
36 564 methyltransferase binds strongly.  
37  
38  
39  
40  
41

42 565

#### 43 566 **4.7 Effects of dCas9 methyltransferases on gene expression**

44 567 Methylation of promoter DNA can be correlated with inhibition of gene transcription. To determine  
45 568 whether the dCas9 methyltransferase-mediated *uPA* and *TGFBR3* promoter methylation could  
46 569 inhibit gene expression, we measured *uPA* and *TGFBR3* mRNA levels by quantitative PCR  
47 570 (qPCR) in HEK293T cells. Compared to the pUC19 transfection control, both *uPA* and *TGFBR3*  
48 571 expression was significantly decreased in cells expressing dCas9-BFP-DNMT3A or dCas9-BFP-  
49 572 DNMT3B and either *uPA* or *TGFBR3* gRNAs (**Fig. 8a**). However, the reduced *uPA* and *TGFBR3*  
50 573 expression does not appear to be only associated with the *de novo* DNA methylation by dCas9  
51 574 methyltransferases (**Fig. 8a**), as inactivating dCas9 methyltransferase mutants dCas9-BFP-  
52 575 DNMT3A(E752A) and dCas9-BFP-DNMT3B(E697A) also cause similar degrees of expression  
53 576 inhibition despite their lack of *de novo* DNA methylation activity.  
54  
55  
56  
57  
58  
59

60 577  
61  
62  
63  
64  
65

1  
2  
3  
4 578 To investigate whether the inhibition of gene expression is specific to the gRNA targeted genes,  
5 579 we conducted RNA sequencing in HEK293T cells expressing dCas9 methyltransferase and *uPA*  
6 580 gRNAs. A large number (> 1000) of differentially expressed genes (DEG) significantly (FDR *P*  
7 581 value < 0.001, fold change > 2) were found in cells expressing *uPA* gRNAs and either dCas9-  
8 582 BFP-DNMT3A or dCas9-BFP-DNMT3B (**Fig. 8b-c**). However, similar effects on the global  
9 583 transcription profile were observed in cells expressing *uPA* gRNAs with dCas9-BFP-DNMT1 or  
10 584 with dCas9-BFP-EGFP lacking *de novo* DNA methylation activity (**Fig. 8d-e**). We cross-compared  
11 585 DEGs among the four groups and 342 (18-32%) genes were commonly identified (**Fig. 8f**). For  
12 586 DEGs found in cells expressing dCas9-BFP-DNMT3A and *uPA* gRNAs, we also performed  
13 587 integrative analyses of the expression change, promoter methylation, and promoter binding  
14 588 intensity (**Fig. 8g**). Very weak but significant correlation was identified for a few clusters of DEGs.  
15 589 Taken together, these results suggest that the non-specific alteration of transcription is not merely  
16 590 caused by promoter methylation or binding of dCas9 methyltransferase. Since *uPA* is an  
17 591 important factor in regulating cell proliferation and inhibition of cell growth was found in cells  
18 592 expressing dCas9 methyltransferases and *uPA* gRNAs (**Supplementary Fig. S12**), the large  
19 593 number of differentially expressed genes might be a result of altered cellular functions. Taken  
20 594 together, our results clearly indicate that inhibition of *uPA* and *TGFBR3* expression by dCas9  
21 595 methyltransferase and corresponding gRNAs is not merely due to *de novo* DNA methylation of  
22 596 their promoters.

23 597  
24 598 To investigate whether longer term inhibition of gene expression can be facilitated by dCas9  
25 599 methyltransferases, five HEK293T fluorescent reporter cell clones carrying different copies of a  
26 600 CMV-mCherry expression cassette (**Supplementary Fig. 13a, b**) were generated. We quantified  
27 601 mCherry level by FACS for two weeks after transfection. We observed that the number of dCas9  
28 602 methyltransferase-expressing cells peaked on day 2 and decreased gradually (**Supplementary**  
29 603 **Fig. 13c**). Maximal inhibition of mCherry levels were observed on day 5 after transfection  
30 604 (**Supplementary Fig. 13d-h**). Compared to other dCas9 fusion proteins, the dCas-BFP-DNMT3A  
31 605 fusion resulted in the highest and longest inhibition of mCherry expression in the reporter cells  
32 606 (four out of five clones) (**Supplementary Fig. 13d-h**). The transient and prolonged inhibition  
33 607 efficacy varied among the five cell clones. For example, clone 2, which has the lowest copy  
34 608 number of transgene, showed the highest transient and longest inhibition by dCas-BFP-DNMT3A  
35 609 (**Supplementary Fig. 13e**). However, expression of mCherry was, in all clones, not significantly  
36 610 different from the pUC19 control after two weeks, suggesting that inhibition of gene expression by  
37 611 dCas9 methyltransferases is not stably maintained.

## 612 613 **Discussion**

1  
2  
3  
4 614 Since dCas9 methyltransferases are targeted to a specific genomic locus simply by a small gRNA,  
5 615 this system is more convenient than ZF- or TALE-based methyltransferases [26, 35, 36]. Recently,  
6 616 Vojta *et al.* and McDonald *et al.* reported that directly fusing DNMT3A to dCas9 could be used to  
7 617 induce DNA methylation at specific loci in HEK293T cells [15, 16]. Consistent with that, we show  
8 618 that dCas9-BFP-DNMT3A can methylate CpGs flanking the gRNA binding sites in genomic loci,  
9 619 further proving the general applicability of dCas9 methyltransferases for targeted DNA  
10 620 methylation in mammalian cells. In addition, our study shows for the first time that the fusion of  
11 621 dCas9 to DNMT3B is also capable of inducing specific DNA methylation, although the efficiency  
12 622 is lower than that of DNMT3A. Additionally, Peter *et al.* showed that the dCas9-DNMT3A-  
13 623 DNMT3L fusion can further improve *de novo* methylation efficiency compared to dCas9-DNMT3A  
14 624 [37]. Together with the reported systems, the dCas9 methyltransferases system reported in this  
15 625 study further broadens the availability and applicability of CRISPR-based reprogramming of DNA  
16 626 methylation. Based on the observation that dCas9 methyltransferases can efficiently methylate  
17 627 the flanking CpG sites from the gRNA binding site, we have developed an open-source web-  
18 628 based gRNA designing tool for dCas9 methyltransferase gRNAs  
19 629 (<http://luolab.au.dk/views/gRNA.cgi>).

20  
21  
22  
23  
24  
25  
26  
27  
28  
29 630  
30 631 On the basis of extensive gene-specific bisulfite pyrosequencing and whole-genome bisulfite  
31 632 sequencing (WGBS), we identified novel off-target methylation characteristics that appear to be  
32 633 predominantly enriched in promoter, 5'UTR, CGI, and open chromatin regions. Since most of  
33 634 these genomic regions are hypomethylated in HEK293T cells, it was expected that the off-target  
34 635 DMRs were enriched in such regions. In other genomic regions, which already have a high level  
35 636 of methylation, a further methylation by dCas9 methyltransferase is not achievable. We  
36 637 discovered that open chromatin regions are highly prone to off-target methylation by dCas9-  
37 638 methyltransferase. Since the *GAPDH* promoter is located a DHS region, this explains why this  
38 639 region is subjected to highly off-target methylation. To further confirm our finding, we repeat the  
39 640 WGBS experiment in triplicates (**Supplementary Fig. 14**). Our result confirmed that the hyper-  
40 641 methylated DMRs identified in previous WGBS experiment (**Fig. 6a**) are significantly increased in  
41 642 cells overexpressing dCas9-BFP-DNMT3A and *uPA* in the repeated experiments  
42 643 (**Supplementary Fig. 14a**). Consistently, DHS regions were significantly methylated in cells  
43 644 expressing dCas9-BFP-DNMT3A and *uPA* (**Supplementary Fig. 14b**).

44  
45  
46  
47  
48  
49  
50  
51 645  
52  
53 646 Our study also revealed the gRNA-dependency of off-target methylation. This is consistent with  
54 647 the observations of McDonald *et al.* and Vojta *et al.* [15, 16]. Additionally, we have discovered  
55 648 that even in the absence of gRNAs, expression of the dCas9-BFP-DNMT3A or dCas9-BFP-  
56 649 DNMT3B alone can cause some unspecific DNA methylation. This gRNA-independent off-target  
57 650 methylation effect is even more pronounced when too many dCas9 methyltransferases, or the  
58  
59  
60  
61  
62  
63  
64  
65

1  
2  
3  
4 651 DNMT3A catalytic domain, enter the nucleus. For example, increasing dCas9 methyltransferase  
5 652 expression level, fusing the catalytic domain of DNMT3A or DNMT3B directly to Cas9 without the  
6 653 BFP linker, or overexpressing the DNMT3A catalytic domain will cause increased gRNA-  
7 654 independent off-target methylation (see extended data and description in **Supplementary File 1**).

8  
9 655  
10  
11 656 In this study, we found that expressing dCas9 methyltransferases and gRNAs could also cause  
12 657 significant demethylation of genomic regions enriched in repeated sequences. Repeated  
13 658 sequences, which make up more than half of the human genome, are generally highly methylated,  
14 659 and their dynamics, to some extent, are associated with normal development and tumorigenesis.  
15 660 A previous study of methylation in repeated sequences has shown that, with increasing age from  
16 661 adulthood, there is a global decrease in DNA methylation in repeated sequences and intergenic  
17 662 genome sequences [38]. We also observed that expression of dCas9 methyltransferase alone or  
18 663 together with gRNA can inhibit HEK293T cell growth (**Supplementary Fig. 12**). The hypo-  
19 664 methylated DMRs could potentially be the result of inhibited cell proliferation by dCas9  
20 665 methyltransferase and gRNAs. This should be investigated in future studies.

21 666  
22  
23 667 Improvement of dCas9 methyltransferase specificity, to minimize the gRNA-dependent and  
24 668 gRNA-independent off-target activity, is crucial for future applications of the technology.  
25 669 McDonald, et al., has observed significant reduction in off-target methylation using DOX inducible  
26 670 dCas9-DNMT3A. Consistent with these findings, we found that reducing the dCas9  
27 671 methyltransferase and gRNA expression levels, as well as lowering the dCas9 methyltransferase  
28 672 nuclear entry efficiency (**Supplementary File 1**), can reduce off-target methylation. However, this  
29 673 approach also reduced on-target methylation levels accordingly. Thus, this may not represent a  
30 674 plausible way of increasing the specificity of the system. New approaches should be developed to  
31 675 reduce off-target methylation while maintaining sufficient on-target methylation efficiencies. The  
32 676 results presented in this study highlight the importance of inclusion of extensive controls in  
33 677 subsequent experiments, such as catalytically inactive dCas9 methyltransferase mutants,  
34 678 scrambled gRNAs, and gRNA free settings. This is necessary for reliable interpretations of  
35 679 correlations between specific DNA methylation events by dCas9 methyltransferase, gene  
36 680 expression regulation and phenotypic effects.

37 681  
38  
39 682 **Off-target effect is one of the major concerns in CRISPR/Cas9 based DNA manipulation**  
40 683 **technologies and applications. Unlike the original CRISPR/Cas9 technology, of which the**  
41 684 **endonuclease activity of Cas9 depends heavily on the base-pairing between the guide sequences**  
42 685 **and the target site (proto-spacer), the dead Cas9 (dCas9) derived CRISPR technologies and**  
43 686 **applications are more depending on the physical interaction between dCas9/gRNA complex and**  
44 687 **the DNA loci, and more tolerance to mismatches. The dCas9 in such CRISPR-derived systems is**

1  
2  
3  
4 688 acting as a cargo protein bringing whatever proteins/domains to a specific genomic locus guided  
5 689 by the small gRNA. As already demonstrated in Figure 2 and Supplementary Figure 4 of this  
6 690 study and several previous investigations by ChIP-seq [39-41], the criteria of defining off-target  
7 691 sites (simply based on mismatches) from wild type Cas9 is not suitable for the dCas9-derived  
8 692 effector proteins, such as the dCas9 methyltransferases. Although our study only evaluated the  
9 693 dCas9 methyltransferases, we speculate that this off-target effects are most likely to be the same  
10 694 for other kind of dCas9 based effectors.  
11  
12  
13  
14  
15

16 696 In this study, we also observed that dCas9 methyltransferases can efficiently inhibit expression of  
17 697 genes in human cells. However, the transient inhibition of gene expression could be resulted from  
18 698 both promoter methylation and blockage of transcription by dCas9 methyltransferases. A previous  
19 699 study reported that targeted DNA methylation by a zinc finger-based methyltransferase is not  
20 700 stably maintained [42]. Our time-course experiments to study the inhibition of gene expression is  
21 701 gradually decreased during *in vitro* expansion of the transfected cells. This could be the result of  
22 702 removal of the *de novo* established epigenetic marks, dilution of the dCas9 methyltransferase  
23 703 expression plasmids, and/or negative selection of the cells expressing dCas9 methyltransferases.  
24 704 We also realize that DNA methylation and gene expression analyses were conducted in cells  
25 705 transiently transfected with dCas9 methyltransferase expression plasmids, which might lead to  
26 706 severe overexpression of the dCas9 methyltransferases. Thus, future studies could benefit from  
27 707 being conducted in cells stably or conditionally expressing low copy numbers of dCas9  
28 708 methyltransferase to minimize off-target methylation. Taken together, our study is the first to  
29 709 reveal novel characteristics of the on-target and off-target DNA methylation by dCas9  
30 710 methyltransferases on a genome-wide scale with single-base resolution and highlights the need  
31 711 for development of CRISPR DNA methylation editing systems with higher specificity.  
32  
33  
34  
35  
36  
37  
38  
39  
40  
41

## 42 713 **Conclusions**

43  
44 714 The dCas9 methyltransferases presented here, and other dCas9 fusion protein systems  
45 715 described previously [11, 12, 15, 16], provide useful tools for targeted epigenome editing.  
46 716 Continued improvement of the specificities of these systems and combining tools to enable  
47 717 simultaneous modification of multiple histones and DNA loci will enable more precise and stable  
48 718 regulation of gene structure and function. Such CRISPR gRNA-guided programmable epigenetic  
49 719 modification tools will hopefully have broad research applications to delineate the association  
50 720 between specific epigenetic changes, gene-expression regulation, and phenotypes.  
51  
52  
53  
54  
55

## 56 722 **Availability of supporting data**

57  
58 723 RNA sequencing, WGBS, and ChIP-seq data are available from the publicly available repository  
59 724 (GEO) and [in GigaDB \[43\]](#).  
60  
61  
62  
63  
64  
65



1  
2  
3  
4  
5  
6  
7  
8  
9  
10  
11  
12  
13  
14  
15  
16  
17  
18  
19  
20  
21  
22  
23  
24  
25  
26  
27  
28  
29  
30  
31  
32  
33  
34  
35  
36  
37  
38  
39  
40  
41  
42  
43  
44  
45  
46  
47  
48  
49  
50  
51  
52  
53  
54  
55  
56  
57  
58  
59  
60  
61  
62  
63  
64  
65

725 RNA-seq: GSE74935  
726 WGBS: GSE92310, GSE92311  
727 ChIP-seq: GSE92261  
728

729 **Declarations**

730 **Competing Interests Statement**

731 The authors declare no competing financial interests.

732

733 **Author contributions**

734 L.L., L.B. and Y.L., conceived the idea.  
735 H.Y., J.W., L.B., X.L. X.X., A.L.N., and Y.L. planned and oversaw the study  
736 L.L., Y.Liu., F.X., J.H., T.F.D., T.S.P., B.H., L.Y., Q.Z., F.F., L.Y., S.L., K.T.J. L.F., E.S., and Y.L.  
737 performed experiments and analyzed the data.  
738 L.L., J.H., and Y.L. prepared the figures.  
739 L.L. and Y.L. drafted the manuscript and all authors revised the manuscript.

740

741 **Acknowledgements**

742 This work was partially supported by grants from Danish Research Council for Independent  
743 Research DFF-1337-00128 (Y.L.), the Sapere Aude Young Research Talent Prize DFF-1335-  
744 00763A (Y.L.), the Innovation Fund Denmark (BrainStem, Y.L.) and the Lundbeck Foundation:  
745 R173-2014-1105 (Y.L.); R151-2013-14439 (L.B.); R219-2016-1375 (L.L.) A.L.N. was supported  
746 by the Toyota-Foundation and the Lundbeck Foundation. FACS was performed with help from  
747 Charlotte Christie Petersen and Anni Skovbo at the FACS Core Facility, Aarhus University,  
748 Denmark.

749

750 **Abbreviations**

751 CRISPR: Clustered Regularly Interspaced Short Palindromic Repeats  
752 Cas9: CRISPR-associated protein 9  
753 dCas9: Nuclease deficient Cas9 or dead Cas9  
754 FACS: Fluorescence-activated cell sorting  
755 WGBS: whole-genome bisulfite sequencing  
756 CGI: CpG island  
757 UTR: Untranslated region  
758 DHS: DNase I hypersensitivity sites  
759 PAM: Protospacer adjacent motif  
760 gRNA: guide RNA  
761 ZF: zinc finger protein

1  
2  
3  
4  
5  
6  
7  
8  
9  
10  
11  
12  
13  
14  
15  
16  
17  
18  
19  
20  
21  
22  
23  
24  
25  
26  
27  
28  
29  
30  
31  
32  
33  
34  
35  
36  
37  
38  
39  
40  
41  
42  
43  
44  
45  
46  
47  
48  
49  
50  
51  
52  
53  
54  
55  
56  
57  
58  
59  
60  
61  
62  
63  
64  
65

762 TALE: transcription-activator-like effectors  
763 qPCR: Quantitative PCR

1  
2  
3  
4 764 **Reference:**

- 5  
6 765 1. Jinek M, Chylinski K, Fonfara I, Hauer M, Doudna JA, Charpentier E: **A programmable dual-RNA-guided DNA endonuclease in adaptive bacterial immunity.** *Science* 2012, **337**:816-821.  
7 766  
8 767  
9 768 2. Mali P, Yang L, Esvelt KM, Aach J, Guell M, Dicarlo JE, Norville JE, Church GM: **RNA-Guided Human Genome Engineering via Cas9.** *Science* 2013.  
10 769  
11 770 3. Jinek M, East A, Cheng A, Lin S, Ma E, Doudna J: **RNA-programmed genome editing in human cells.** *elife* 2013, **2**:e00471.  
12 771  
13 772 4. Cong L, Ran FA, Cox D, Lin S, Barretto R, Habib N, Hsu PD, Wu X, Jiang W, Marraffini LA, Zhang F: **Multiplex genome engineering using CRISPR/Cas systems.** *Science* 2013, **339**:819-823.  
14 773  
15 774  
16 775 5. Johan Vad-Nielsen LL, Lars Bolund, Anders Lade Nielsen, Yonglun Luo **Golden-Gate assembly of CRISPR gRNA Expression Array for Simultaneously Targeting Multiple Genes.** *Cell Mol Life Sci* 2016.  
17 776  
18 777  
19 778 6. Qi LS, Larson MH, Gilbert LA, Doudna JA, Weissman JS, Arkin AP, Lim WA: **Repurposing CRISPR as an RNA-Guided Platform for Sequence-Specific Control of Gene Expression.** *Cell* 2013, **152**:1173-1183.  
20 779  
21 780  
22 781 7. Cheng AW, Wang H, Yang H, Shi L, Katz Y, Theunissen TW, Rangarajan S, Shivalila CS, Dadon DB, Jaenisch R: **Multiplexed activation of endogenous genes by CRISPR-on, an RNA-guided transcriptional activator system.** *Cell Res* 2013, **23**:1163-1171.  
23 782  
24 783  
25 784  
26 785 8. Gilbert LA, Larson MH, Morsut L, Liu Z, Brar GA, Torres SE, Stern-Ginossar N, Brandman O, Whitehead EH, Doudna JA, et al: **CRISPR-mediated modular RNA-guided regulation of transcription in eukaryotes.** *Cell* 2013, **154**:442-451.  
27 786  
28 787  
29 788  
30 789 9. Fujita T, Fujii H: **Efficient isolation of specific genomic regions and identification of associated proteins by engineered DNA-binding molecule-mediated chromatin immunoprecipitation (enChIP) using CRISPR.** *Biochem Biophys Res Commun* 2013, **439**:132-136.  
31 790  
32 791  
33 792  
34 793 10. Chen B, Gilbert LA, Cimini BA, Schnitzbauer J, Zhang W, Li GW, Park J, Blackburn EH, Weissman JS, Qi LS, Huang B: **Dynamic imaging of genomic loci in living human cells by an optimized CRISPR/Cas system.** *Cell* 2013, **155**:1479-1491.  
35 794  
36 795  
37 796  
38 797 11. Kearns NA, Pham H, Tabak B, Genga RM, Silverstein NJ, Garber M, Maehr R: **Functional annotation of native enhancers with a Cas9-histone demethylase fusion.** *Nat Methods* 2015, **12**:401-403.  
39 798  
40 799  
41 800 12. Hilton IB, D'Ippolito AM, Vockley CM, Thakore PI, Crawford GE, Reddy TE, Gersbach CA: **Epigenome editing by a CRISPR-Cas9-based acetyltransferase activates genes from promoters and enhancers.** *Nat Biotechnol* 2015, **33**:510-517.  
42 801  
43 802  
44 803  
45 804 13. Jones PA, Baylin SB: **The fundamental role of epigenetic events in cancer.** *Nat Rev Genet* 2002, **3**:415-428.  
46 805  
47 806 14. Brena RM, Costello JF: **Genome-epigenome interactions in cancer.** *Hum Mol Genet* 2007, **16 Spec No 1**:R96-105.  
48 807  
49  
50  
51  
52  
53  
54  
55  
56  
57  
58  
59  
60  
61  
62  
63  
64  
65

1  
2  
3  
4  
5  
6  
7  
8  
9  
10  
11  
12  
13  
14  
15  
16  
17  
18  
19  
20  
21  
22  
23  
24  
25  
26  
27  
28  
29  
30  
31  
32  
33  
34  
35  
36  
37  
38  
39  
40  
41  
42  
43  
44  
45  
46  
47  
48  
49  
50  
51  
52  
53  
54  
55  
56  
57  
58  
59  
60  
61  
62  
63  
64  
65

808 15. Vojta A, Dobrinic P, Tadic V, Bockor L, Korac P, Julg B, Klasic M, Zoldos V:  
809 **Repurposing the CRISPR-Cas9 system for targeted DNA methylation.**  
810 *Nucleic Acids Res* 2016.

811 16. McDonald JI, Celik H, Rois LE, Fishberger G, Fowler T, Rees R, Kramer A,  
812 Martens A, Edwards JR, Challen GA: **Reprogrammable CRISPR/Cas9-based**  
813 **system for inducing site-specific DNA methylation.** *Biol Open* 2016, **5**:866-  
814 874.

815 17. Livak KJ, Schmittgen TD: **Analysis of relative gene expression data using**  
816 **real-time quantitative PCR and the 2(-Delta Delta C(T)) Method.** *Methods*  
817 2001, **25**:402-408.

818 18. Rohde C, Zhang Y, Reinhardt R, Jeltsch A: **BISMA--fast and accurate**  
819 **bisulfite sequencing data analysis of individual clones from unique and**  
820 **repetitive sequences.** *BMC Bioinformatics* 2010, **11**:230.

821 19. Wagner GP, Kin K, Lynch VJ: **Measurement of mRNA abundance using**  
822 **RNA-seq data: RPKM measure is inconsistent among samples.** *Theory*  
823 *Biosci* 2012, **131**:281-285.

824 20. Xi Y, Li W: **BSMAP: whole genome bisulfite sequence MAPping program.**  
825 *BMC Bioinformatics* 2009, **10**:232.

826 21. Law JA, Jacobsen SE: **Establishing, maintaining and modifying DNA**  
827 **methylation patterns in plants and animals.** *Nat Rev Genet* 2010, **11**:204-  
828 220.

829 22. Pakneshan P, Szyf M, Farias-Eisner R, Rabbani SA: **Reversal of the**  
830 **hypomethylation status of urokinase (uPA) promoter blocks breast**  
831 **cancer growth and metastasis.** *J Biol Chem* 2004, **279**:31735-31744.

832 23. Gowher H, Jeltsch A: **Molecular enzymology of the catalytic domains of**  
833 **the Dnmt3a and Dnmt3b DNA methyltransferases.** *J Biol Chem* 2002,  
834 **277**:20409-20414.

835 24. Margot JB, Aguirre-Arteta AM, Di Giacco BV, Pradhan S, Roberts RJ, Cardoso  
836 MC, Leonhardt H: **Structure and function of the mouse DNA**  
837 **methyltransferase gene: Dnmt1 shows a tripartite structure.** *J Mol Biol*  
838 2000, **297**:293-300.

839 25. Fu Y, Foden JA, Khayter C, Maeder ML, Reyon D, Joung JK, Sander JD: **High-**  
840 **frequency off-target mutagenesis induced by CRISPR-Cas nucleases in**  
841 **human cells.** *Nat Biotechnol* 2013.

842 26. Rivenbark AG, Stolzenburg S, Beltran AS, Yuan X, Rots MG, Strahl BD,  
843 Blancafort P: **Epigenetic reprogramming of cancer cells via targeted DNA**  
844 **methylation.** *Epigenetics* 2012, **7**:350-360.

845 27. Yang AS, Estecio MR, Doshi K, Kondo Y, Tajara EH, Issa JP: **A simple method**  
846 **for estimating global DNA methylation using bisulfite PCR of repetitive**  
847 **DNA elements.** *Nucleic Acids Res* 2004, **32**:e38.

848 28. Landan G, Cohen NM, Mukamel Z, Bar A, Molchadsky A, Brosh R, Horn-Saban  
849 S, Zalcenstein DA, Goldfinger N, Zundelovich A, et al: **Epigenetic**  
850 **polymorphism and the stochastic formation of differentially methylated**  
851 **regions in normal and cancerous tissues.** *Nat Genet* 2012, **44**:1207-1214.

1  
2  
3  
4  
5  
6  
7  
8  
9  
10  
11  
12  
13  
14  
15  
16  
17  
18  
19  
20  
21  
22  
23  
24  
25  
26  
27  
28  
29  
30  
31  
32  
33  
34  
35  
36  
37  
38  
39  
40  
41  
42  
43  
44  
45  
46  
47  
48  
49  
50  
51  
52  
53  
54  
55  
56  
57  
58  
59  
60  
61  
62  
63  
64  
65

29. Wu H, Xu T, Feng H, Chen L, Li B, Yao B, Qin Z, Jin P, Conneely KN: **Detection of differentially methylated regions from whole-genome bisulfite sequencing data without replicates.** *Nucleic Acids Res* 2015, **43**:e141.

30. Kuscu C, Arslan S, Singh R, Thorpe J, Adli M: **Genome-wide analysis reveals characteristics of off-target sites bound by the Cas9 endonuclease.** *Nat Biotechnol* 2014, **32**:677-683.

31. Wu X, Scott DA, Kriz AJ, Chiu AC, Hsu PD, Dadon DB, Cheng AW, Trevino AE, Konermann S, Chen S, et al: **Genome-wide binding of the CRISPR endonuclease Cas9 in mammalian cells.** *Nat Biotechnol* 2014, **32**:670-676.

32. Jensen KT, Floe L, Petersen TS, Huang J, Xu F, Bolund L, Luo Y, Lin L: **Chromatin accessibility and guide sequence secondary structure affect CRISPR-Cas9 gene editing efficiency.** *FEBS Lett* 2017.

33. Bailey TL, Elkan C: **Fitting a mixture model by expectation maximization to discover motifs in biopolymers.** *Proc Int Conf Intell Syst Mol Biol* 1994, **2**:28-36.

34. Liu XS, Wu H, Ji X, Stelzer Y, Wu X, Czauderna S, Shu J, Dadon D, Young RA, Jaenisch R: **Editing DNA Methylation in the Mammalian Genome.** *Cell* 2016, **167**:233-247 e217.

35. Bernstein DL, Le Lay JE, Ruano EG, Kaestner KH: **TALE-mediated epigenetic suppression of CDKN2A increases replication in human fibroblasts.** *J Clin Invest* 2015, **125**:1998-2006.

36. Meister GE, Chandrasegaran S, Ostermeier M: **Heterodimeric DNA methyltransferases as a platform for creating designer zinc finger methyltransferases for targeted DNA methylation in cells.** *Nucleic Acids Res* 2010, **38**:1749-1759.

37. Stepper P, Kungulovski G, Jurkowska RZ, Chandra T, Krueger F, Reinhardt R, Reik W, Jeltsch A, Jurkowski TP: **Efficient targeted DNA methylation with chimeric dCas9-Dnmt3a-Dnmt3L methyltransferase.** *Nucleic Acids Res* 2016.

38. Suelves M, Carrio E, Nunez-Alvarez Y, Peinado MA: **DNA methylation dynamics in cellular commitment and differentiation.** *Brief Funct Genomics* 2016, **15**:443-453.

39. O'Geen H, Henry IM, Bhakta MS, Meckler JF, Segal DJ: **A genome-wide analysis of Cas9 binding specificity using ChIP-seq and targeted sequence capture.** *Nucleic Acids Res* 2015, **43**:3389-3404.

40. Zhang XH, Tee LY, Wang XG, Huang QS, Yang SH: **Off-target Effects in CRISPR/Cas9-mediated Genome Engineering.** *Mol Ther Nucleic Acids* 2015, **4**:e264.

41. Duan J, Lu G, Xie Z, Lou M, Luo J, Guo L, Zhang Y: **Genome-wide identification of CRISPR/Cas9 off-targets in human genome.** *Cell Res* 2014, **24**:1009-1012.

42. Kungulovski G, Nunna S, Thomas M, Zanger UM, Reinhardt R, Jeltsch A: **Targeted epigenome editing of an endogenous locus with chromatin modifiers is not stably maintained.** *Epigenetics Chromatin* 2015, **8**:12.

43. Lin, L; Liu, Y; Xu, F; Huang, J; Daugaard, T, F; Petersen, T, S; Hansen, B; Ye, L; Zhou, Q; Fang, F; Yang, L; Li, S; Fløe, L; Jensen, K, T; Shrock, E; Chen, F; Yang, H; Wang, J;

1  
2  
3  
4  
5  
6  
7  
8  
9  
10  
11  
12  
13  
14  
15  
16  
17  
18  
19  
20  
21  
22  
23  
24  
25  
26  
27  
28  
29  
30  
31  
32  
33  
34  
35  
36  
37  
38  
39  
40  
41  
42  
43  
44  
45  
46  
47  
48  
49  
50  
51  
52  
53  
54  
55  
56  
57  
58  
59  
60  
61  
62  
63  
64  
65

Liu, X; Xu, X; Bolund, L; Nielsen, A, L; Luo, Y **Supporting data for "Genome-wide determination of on-target and off-target characteristics for RNA-guided DNA Methylation by dCas9 methyltransferases". GigaScience 2018. <http://dx.doi.org/10.5524/100406>**

1  
2  
3  
4 **906 Figure captions**

5  
6 **907**

7 **908 Fig. 1 *De novo* uPA and TGFBR3 methylation by RNA-guided dCas9 methyltransferases**

8  
9 **909 (a)** Schematic illustration of the dCas9 methyltransferase expression vectors. PGK:  
10 phosphoglycerate kinase promoter; G4S: GGGGS linker; NLS: nuclear localization signal; U6:  
11 human U6 promoter.  
12

13 **912 (b)** Schematic illustration of the *uPA* promoter and gRNA target sites (T1-T5), two *uPA*  
14 methylated regions (*uPA*-MR1, *uPA*-MR2) and CpGs analyzed by bisulfite pyrosequencing. TSS:  
15 Transcription start site. Numbers indicate distances in base pairs from TSS.  
16

17 **915 (c)** Line plots of the percentage of methylated CpGs (mCpG). Red line: the BFP positive cells  
18 (BFPp). Light blue line: BFP negative cells (BFPn). Note that %mCpG in control cells transfected  
19 with pUC19 has been re-plotted as a reference (black line). BFPn cells include cells expressing  
20 very low level of dCas9 methyltransferase. Each data point represents mean  $\pm$  SD ( $n = 2-4$ ).  
21 Asterisk (\*) indicates statistical significance ( $p < 0.05$ ) compared to the control after Bonferroni  
22 correction.  
23

24 **921 (d)** Schematic illustration of the human *TGFBR3* promoter locus, *TGFBR3* gRNA binding sites  
25 (red arrows), potential off-target binding sites (black horizontal arrows) of the scrambled gRNA,  
26 and CpG sites.  
27

28 **924 (e)** Line plots of % mCpG at the *TGFBR3* promoter in cells expressing dCas9 methyltransferase  
29 with (red line) or without (green line) *TGFBR3* gRNAs, or with the scrambled gRNAs (gray line).  
30 Note that %mCpG in control cells transfected with pUC19 has been re-plotted as a reference  
31 (black line). Each data point represents mean  $\pm$  SD ( $n = 2-5$ ).  
32

33 **928 (f-g)** Bar chart of average methylation levels for *TGFBR3*-MR1 (f) and *TGFBR3*-MR2 (g) CpG  
34 sites. Values represent mean  $\pm$  SD ( $n = 3$ ). Asterisk (\*) represents P value  $< 0.05$  compared to  
35 pUC19 (ANOVA).  
36

37  
38  
39  
40  
41  
42 **931**

43 **932 Fig. 2 Off-target methylation of GAPDH promoter by dCas9 methyltransferases and gRNAs**

44 **933 (a)** Schematic illustration of the *GAPDH* promoter. Potential off target sites and CpGs analyzed  
45 by bisulfite pyrosequencing are indicated. Sequences of potential off-target binding sites by *uPA*,  
46 *TGFBR3* and scrambled gRNAs with maximum 10 mismatches are listed.  
47

48 **936 (b-d)** Line plots of *GAPDH* promoter methylation in FACS-sorted HEK293T cells 48 hours after  
49 transfection with dCas9 methyltransferases and gRNAs. The methylation profiles from the  
50 pUC19-transfected samples were re-plotted as reference. Each data point in the graph  
51 represents the mean  $\pm$  SD ( $n = 2$  independent transfections). Average methylation levels for all  
52 CpGs analyzed are presented next to line legends. Asterisks (\*) represent P value  $< 0.05$   
53 compared to pUC19 (ANOVA).  
54  
55  
56  
57  
58

59 **942**  
60  
61  
62  
63  
64  
65

1  
2  
3  
4  
5  
6  
7  
8  
9  
10  
11  
12  
13  
14  
15  
16  
17  
18  
19  
20  
21  
22  
23  
24  
25  
26  
27  
28  
29  
30  
31  
32  
33  
34  
35  
36  
37  
38  
39  
40  
41  
42  
43  
44  
45  
46  
47  
48  
49  
50  
51  
52  
53  
54  
55  
56  
57  
58  
59  
60  
61  
62  
63  
64  
65

943 **Fig. 3 On-target methylation by dCas9 methyltransferases**

944 (a) Schematic illustration of the experiment. dCas9 methyltransferase-expressing cells were  
945 enriched by FACS 48 hours after transfection and sorted according to the BFP signal: +, ++, +++,  
946 +++++. Right: Representative FACS plot and gating.

947 (b-c) Bar charts indicating % mCpG for individual CpG and average values of all CpG sites in the  
948 *uPA* (b) and *TGFBR3* (c) target regions. The schematic illustrations above the bar graphs show  
949 gRNA binding sites and CpG sites analyzed. Value represents mean  $\pm$  SD (n = 3). Asterisk (\*)  
950 indicates statistical significance (p < 0.05, ANOVA) compared to the control after Bonferroni  
951 correction. Figure legend for bar graphs in (b) and (c) is presented at bottom-right.

952

953 **Fig. 4 Off-target methylation by dCas9 methyltransferases**

954 (a) Bar charts indicating % mCpG at individual CpGs and total % mCpG (8 CpG sites) for the  
955 *GAPDH* promoter in cells expressing different levels (BFP signal: +, ++, +++, +++++) of dCas9-  
956 BFP-DNMT3A or dCas9-BFP-DNMT3A(E752A) alone or together with either *uPA* or *TGFBR3*  
957 gRNAs.

958 (b) Bar charts indicating % mCpG in the *GAPDH* promote in cells expressing different levels (BFP  
959 signal: +, ++, +++, +++++) of dCas9-BFP-DNMT3B or dCas9-BFP-DNMT3B(E697A) alone or with  
960 *TGFBR3* gRNAs.

961 (c) *LINE1* 5'UTR methylation in cells expressing *uPA* gRNAs with different levels of either dCas9-  
962 BFP-DNMT3A or dCas9-BFP-DNMT3A(E752A). Cells transfected with pUC19 were used as  
963 controls. Values represent mean  $\pm$  SD (n = 3). Asterisks (\*) represent P value < 0.05 (ANOVA)  
964 compared to pUC19.

965

966 **Fig. 5 De novo methylation of *uPA*, *TGFBR3* and *GAPDH* promoters by dCas9**

967 **methyltransferase measured with WGBS.** Dot plots of % mCpG for individual CpG sites in the  
968 *uPA*, *TGFBR3* and *GAPDH* promoter regions. Each dot represents one CpG site. Right panel  
969 indicates the transfected plasmids. mCpG levels were quantified by WGBS. Scale bar, 200 bp.

970

971 **Fig. 6 Genomic characteristics of off-target DMRs caused by dCas9 methyltransferases**  
972 **and *uPA* gRNAs**

973 (a) Box plot (top) and heatmap clustering (bottom) of the hypermethylated (left) and  
974 hypomethylated (right) DMRs resulting from dCas9 methyltransferases and *uPA* gRNAs.

975 (b) Venn diagram presentation of hypermethylated (top) or hypomethylated (bottom) DMRs  
976 caused by dCas9 methyltransferases and *uPA* gRNAs compared to *TGFBR3* gRNAs.

977 (c-d) Bar chart illustrating the percentage of the identified *uPA* hypermethylated (c) or  
978 hypomethylated (d) DMRs that fall into the different types of genomic regions indicated.

979 Background represents a random sample of the same number of similar sized genomic windows



1  
2  
3  
4  
5  
6  
7  
8  
9  
10  
11  
12  
13  
14  
15  
16  
17  
18  
19  
20  
21  
22  
23  
24  
25  
26  
27  
28  
29  
30  
31  
32  
33  
34  
35  
36  
37  
38  
39  
40  
41  
42  
43  
44  
45  
46  
47  
48  
49  
50  
51  
52  
53  
54  
55  
56  
57  
58  
59  
60  
61  
62  
63  
64  
65

980 that fall into the categories indicated. Values above bars are P values between background and  
981 uPA-DMRs (Fisher's exact test).  
982 (e) Metaplot of average CpG methylation levels in 58,494 DNase I hypersensitive sites (DHS) and  
983 1 kb upstream and downstream flanking regions.  
984 (f-g) Bar chart of % uPA hypermethylated (f) or hypomethylated (g) DMRs falling into DHS core  
985 regions.  
986 (h) Density of 5nt-SEED-NGG for uPA gRNAs (T1 to T5) in background genomic windows and  
987 uPA DMRs + flanking 100 bp. Values represent median density with one standard deviation. P  
988 values (t-test) are given above the bar charts.

990 **Fig. 7 Correlation between dCas9-BFP-DNMT3A off-target binding and off-target**  
991 **methylation**

992 (a) Bar chart illustrating the percentage of ChIP peaks from cells expressing dCas9-BFP-  
993 DNMT3A and uPA gRNAs or background control regions (random sampling of the same number  
994 of similar sized genomic windows as the ChIP peaks) falling into the different types of genomic  
995 regions indicated. P-values between background and ChIP peaks indicated above bars, Fisher's  
996 exact test.  
997 (b) Bar chart of % ChIP-peaks falling into DHS core regions.  
998 (c) Representative plot of ChIP-seq reads in the *uPA* promoter, uPA gRNA T2 sequences, and  
999 the top motif identified by MEME-ChIP.  
1000 (d) Density of 5nt-SEED-NGG for uPA gRNAs (T1 to T5) ChIP peaks. Background is a random  
1001 sample of the same number of similar sized genomic windows as ChIP peaks. Values represent  
1002 median density with one standard deviation. P values are given for the indicated comparisons (t-  
1003 test).  
1004 (e) Bar plot of % ChIP peaks overlapping with hypermethylated DMRs caused by dCas9  
1005 methyltransferase and *uPA* gRNAs. Background is a random sample of the same number of  
1006 similar sized genomic windows as DMRs.

1008 **Fig. 8 Effect of dCas9 methyltransferases on gene expression**

1009 (a) Relative gene expression levels of *uPA* and *TGFBR3* in cells expressing different levels of  
1010 dCas9-BFP-DNMT3A, dCas9-BFP-DNMT3B, dCas9-BFP-DNMT3A(E752A), or dCas9-BFP-  
1011 DNMT3B(E697A). mRNA expression was measured by qPCR and quantified as fold change  
1012 compared to control cells transfected with pUC19. Bar charts depict mean change in mRNA level  
1013 compared to pUC19 controls. Data represent mean  $\pm$  SD (n = 3 independent transfections). Mean  
1014 percentage decrease in mRNA level compared to pUC19 is presented on top of bars. Asterisks (\*)  
1015 represent P value < 0.05 compared to pUC19.

1  
2  
3  
4  
5  
6  
7  
8  
9  
10  
11  
12  
13  
14  
15  
16  
17  
18  
19  
20  
21  
22  
23  
24  
25  
26  
27  
28  
29  
30  
31  
32  
33  
34  
35  
36  
37  
38  
39  
40  
41  
42  
43  
44  
45  
46  
47  
48  
49  
50  
51  
52  
53  
54  
55  
56  
57  
58  
59  
60  
61  
62  
63  
64  
65

1016 **(b-e)** Dot plots of log<sub>10</sub> (transcripts per million (TPM)) for all genes expressed in the BFP positive  
1017 (BFPp) cells expressing *uPA* gRNAs (T1-T5) and dCas9-BFP-DNMT3A **(b)**, dCas9-BFP-  
1018 DNMT3B **(c)**, dCas9-BFP-DNMT1 **(d)**, or dCas9-BFP-EGFP **(e)** plotted against log<sub>10</sub> (TPM) in a  
1019 pUC19 control group. Differentially expressed genes (DEG) are marked in red (up-regulated) and  
1020 green (down-regulated) (fold change  $\geq 2$ , FDR  $< 0.001$ ). Fold changes compared to pUC19 and  
1021 FDR p-values for DNMT1, *DNMT3A*, *DNMT3B*, *EGFP*, and *uPA* are shown.  
1022 **(f)** Venn diagram representation of cross-comparison of DEGs.  
1023 **(g)** Integrative analysis of gene expression change, promoter methylation and promoter binding  
1024 caused by dCas9-BFP-DNMT3A and *uPA* gRNAs for the different clusters of DEGs. Heatmap  
1025 represents linear regression p values. Dot plots were given for significant correlations ( $p < 0.05$ ).  
1026  
1027  
1028  
1029  
1030  
1031

1  
2  
3  
4  
5  
6  
7  
8  
9  
10  
11  
12  
13  
14  
15  
16  
17  
18  
19  
20  
21  
22  
23  
24  
25  
26  
27  
28  
29  
30  
31  
32  
33  
34  
35  
36  
37  
38  
39  
40  
41  
42  
43  
44  
45  
46  
47  
48  
49  
50  
51  
52  
53  
54  
55  
56  
57  
58  
59  
60  
61  
62  
63  
64  
65

## 1032 **Supplementary Figure Legends**

1033

### 1034 **Supplementary Fig. S1 Validation of dCas9 methyltransferase expression and *uPA*** 1035 **promoter methylation**

1036 (a) Schematic overview of the human DNA methyltransferases (DNMT1, DNMT3A and DNMT3B)  
1037 with the N-terminal regulatory region, a C-terminal catalytic domain (CD), and the cytosine C5-  
1038 DNA methyltransferase motifs highlighted. The first amino acid (a.a) residue of the C-terminal  
1039 catalytic domain, which was fused to the dCas9, is indicated by an arrow.

1040 (b) Representative FACS sorting and Re-analysis of HEK293T cells 48 hours after transfection.  
1041 Gating for BFP positive (BFPp) and negative (BFPn) cells are indicated.

1042 (c) Laser scanning microscopy of **dCas9 methyltransferase** expression in HEK293T cells, 48  
1043 hours after transfection. The BFP signal from the dCas9-BFP-DNMT1 transfected cells was  
1044 enhanced since the BFP signal from the dCas9-BFP-DNMT1 fusion was initially weaker  
1045 compared to that from the other three fusion proteins. Scale bar: 20  $\mu$ m.

1046 (d) Validation of RNA-guided *uPA* methylation (*uPA*-MR1) by dCas9-BFP-DNMT3A using bisulfite  
1047 Sanger sequencing.

1048

### 1049 **Supplementary Fig. S2 Validation of dCas9 methyltransferase-mediated *TGFBR3*** 1050 **methylation in HEK293T cells by bisulfite Sanger sequencing**

1051 *TGFBR3* methylation by dCas9 methyltransferase and gRNAs was validated by bisulfite Sanger  
1052 sequencing. CpG methylation status is indicated according to the absolute nucleotide position  
1053 and color-coded as red, methylated; blue, unmethylated; or white, unknown methylation state  
1054 based on the sequencing signal.

1055

### 1056 **Supplementary Fig. S3 Validation of *de novo* methylation of *uPA* by dCas9** 1057 **methyltransferase and *uPA* gRNAs**

1058 Line plots of *uPA*-MR2 methylation in cells transfected with pUC19 (control), dCas9-BFP-  
1059 DNMT3A or dCas9-BFP-DNMT3B only, and dCas9-BFP-DNMT3A or dCas9-BFP-DNMT3B  
1060 together with either *uPA* gRNAs or scrambled gRNAs.

1061

### 1062 **Supplementary Fig. S4 Effect of dCas9 methyltransferases on two potential off-target sites** 1063 **(*SH2D3C* and *FAM221A*).**

1064 (a-b) Schematic illustration of the *SH2D3C* (b) and *FAM221A* (c) off-target loci, with off-target  
1065 sites indicated by red arrows. Sequences of *uPA* gRNA (T2), *SH2D3C*, and *FAM221A* off-target  
1066 sites are given above, with the PAM (red letters) and mismatches (green letters) indicated. CpGs  
1067 analyzed are indicated by black arrows; numbers indicate distances (in bp) from the transcription  
1068 start site (TSS) of the gene (*SH2D3C*, NM\_001252334.1) or (*FAM221A*, XM\_011515369.1). Y-

1  
2  
3  
4  
5  
6  
7  
8  
9  
10  
11  
12  
13  
14  
15  
16  
17  
18  
19  
20  
21  
22  
23  
24  
25  
26  
27  
28  
29  
30  
31  
32  
33  
34  
35  
36  
37  
38  
39  
40  
41  
42  
43  
44  
45  
46  
47  
48  
49  
50  
51  
52  
53  
54  
55  
56  
57  
58  
59  
60  
61  
62  
63  
64  
65

1069 axis represents % mCpG level for each CpG site and X-axis represents distance (in bp) from TSS.  
1070 The CpG methylation level from the control samples (pUC19 transfection) was re-plotted as a  
1071 reference. Each data point in the graph represents the mean percentage of CpGs methylated  $\pm$   
1072 SD (n = 2, independent transfections).

1073  
1074

1075 **Supplementary Fig. S5 Effects of DNMT3B catalytic activity and expression level on *de***  
1076 ***novo* TGFBR3 methylation**

1077 Bar charts of % mCpG level for individual CpG sites of the *TGFBR3* targeted regions in dCas9  
1078 methyltransferase-expressing cells. Cells were enriched by FACS 48 hours after transfection and  
1079 sorted according to the BPF signal: +, ++, +++, +++++. The schematic illustrations above the bar  
1080 charts show gRNA binding sites and CpG sites analyzed. Asterisk (\*) indicates statistical  
1081 significance (p < 0.05, ANOVA) compared to the pUC19 control group after Bonferroni correction.  
1082 Percentage values represent % decrease of *TGFBR3* expression compared to pUC19.

1083

1084 **Supplementary Fig. S6 WGBS analysis of cells expressing dCas9 methyltransferase and**  
1085 **gRNAs**

1086 (a) Summary of WGBS including clean data, clean reads, clean rate, mapped reads, uniquely  
1087 mapped reads and rate, and bisulfite conversion rate, for each experimental group and control  
1088 (pUC19).

1089 (b) Average percentage of methylated cytosine (% mC) for whole-genome CpG sites, CHG sites,  
1090 and CHH sites. "H" represents A, C, and T.

1091 (c-d) Average mCpG level (percentage) stratified according to individual chromosome or whole  
1092 genome for all samples measured by WGBS.

1093

1094 **Supplementary Fig. S7 Differentially methylated regions (DMRs) identified by DSS-single**  
1095 **method.** DMRs were categorized as hypermethylated or hypomethylated compared to control  
1096 sample (pUC19 transfection).

1097

1098 **Supplementary Fig. S8 Histogram charts of the distribution of DMR length (bp), and**  
1099 **number of CpGs per DMR.** DMRs included in this figure are those remaining after the stringent  
1100 filtering step (see methods). Mean DMRs length (in bp) and mean number of CpG per DMR were  
1101 given for each chart.

1102

1103 **Supplementary Fig. S9 Genomic characteristics of off-target DMRs caused by dCas9**  
1104 **methyltransferases and TGFBR3 gRNAs**

1  
2  
3  
4 1105 (a) Box plot (top) and heatmap clustering (bottom) of the hypermethylated (left) and  
5 1106 hypomethylated (right) DMRs caused by dCas9 methyltransferases and *TGFBR3* gRNAs.  
6  
7 1107 (b-c) Bar chart illustrating the percentage of the identified *TGFBR3* hypermethylated (c) or  
8 1108 hypomethylated (d) DMRs that fall into the different types of genomic regions indicated.  
9  
10 1109 Background represents of a random sample of the same number of similar sized genomic  
11 1110 windows that fall into the categories indicated. Values above bars are P values between  
12 1111 background and *TGFBR3* DMRs, Fisher's exact test.  
13  
14 1112 (d) Metaplot of average CpG methylation levels in 58,494 DNase I hypersensitive sites (DHS)  
15 1113 and 1 kb upstream and downstream flanking regions.  
16  
17 1114 (e-f) Bar chart of % *TGFBR3* hypermethylated (f) or hypomethylated (g) DMRs falling into DHS  
18 1115 core regions.  
19  
20 1116 (h) Density of 5nt-SEED-NGG for *TGFBR3* gRNAs (T1 to T3) in background genomic windows  
21 1117 and *TGFBR3* DMRs + flanking 100 bp. Values represent median density with one standard  
22 1118 deviation. P values (t-test) are given above the bar charts.  
23  
24 1119  
25  
26  
27 1120 **Supplementary Fig. S10 Average methylation levels of seven genomic regions in all**  
28 1121 **annotated genes (hg19).** (a-d) Each line indicates the genome-wide average methylation levels  
29 1122 across seven genomic regions: upstream 2kb of the transcription start site, first exon, first intron,  
30 1123 internal exons, internal introns, last exon, and downstream 2kb of the last exon.  
31  
32 1124  
33  
34 1125  
35  
36 1126 **Supplementary Fig. S11 The average methylation level in ChIP-peaks and flanking regions.**  
37 1127 Bar chat presents the average methylation level of all dCas9-BFP-DNMT3A and uPA gRNA off-  
38 1128 target binding sites (n = 7754) found by ChIPseq, as well as the 2kb upstream and downstream  
39 1129 region.  
40  
41 1130 **Supplementary Fig. S12 Effect of dCas9 methyltransferases and uPA gRNAs on cell**  
42 1131 **growth.** Cell growth was determined by counting the number of cell clones derived from 1,000  
43 1132 BFP positive cells after transfection. Values represent mean and one standard deviation from 6  
44 1133 experimental repeats. Asterisks represent a p value < 0.05 (ANOVA) compared to pUC19  
45 1134 transfection control.  
46  
47 1135  
48 1136  
49  
50 1137 **Supplementary Fig. S13 Effects of dCas9 methyltransferases on mCherry expression in**  
51 1138 **fluorescence reporter cell lines**  
52  
53 1139 (a) Schematic illustration of the mCherry fluorescence transgene expression cassette. The target  
54 1140 sites of the gRNAs within the CMV promoter are indicated by red arrows (5'-3', targeting sense or  
55 1141 antisense strands).

1  
2  
3  
4  
5  
6  
7  
8  
9  
10  
11  
12  
13  
14  
15  
16  
17  
18  
19  
20  
21  
22  
23  
24  
25  
26  
27  
28  
29  
30  
31  
32  
33  
34  
35  
36  
37  
38  
39  
40  
41  
42  
43  
44  
45  
46  
47  
48  
49  
50  
51  
52  
53  
54  
55  
56  
57  
58  
59  
60  
61  
62  
63  
64  
65

1142 (b) Southern blot analysis of five cell clones with the transgene cassette randomly and stably  
1143 integrated into the genome.

1144 (c) Flow cytometry-based analysis of the percentage of BFP positive cells in the fluorescence  
1145 reporter cells at 2, 5, 8 and 14 days after transient transfection with CMV gRNAs (T1-T3) and  
1146 dCas9-BFP-DNMT1, dCas9-BFP-DNMT3A, dCas9-BFP-DNMT3B, or dCas9-BFP-EGFP.

1147 (d-h) % mCherry fluorescence median intensity in these five clones at day 2, 5, 8, and 14 days  
1148 following transient transfection with CMV gRNAs (T1-T3) and dCas9-BFP-DNMT1, dCas9-BFP-  
1149 DNMT3A, dCas9-BFP-DNMT3B, or dCas9-BFP-EGFP. Control cells were transfected with  
1150 pUC19. Percent inhibition of mCherry expression was calculated by normalizing the median  
1151 mCherry fluorescence intensity to that from the pUC19 transfected cells at each time point.  
1152 Figures are plotted using the mean % mCherry median  $\pm$  SD (n = 3, independent transfections).  
1153 ANOVA with Bonferroni comparison was performed for cell clone 2. "a", "b", "c", and "d," indicates  
1154 a p-value < 0.05 compared to the pUC19 control for the corresponding transfection group.

1155  
1156 **Supplementary Fig. S14 Validation of hypermethylated DMRs and DHS methylation caused**  
1157 **by dCas9-BFP-DNMT3A and uPA gRNAs by WGBS**

1158 (a) Box plot of % methylation level of hypermethylated DMRs dCas9 found in previous WGBS  
1159 experiment. The WGBS in the repeat experiment was conducted as described in the methods  
1160 sections, but cells were not FACS enriched and sequenced in lower depth than previous  
1161 experiment.

1162 (b) Metaplot of average CpG methylation levels in 58,494 DNase I hypersensitive sites (DHS)  
1163 and 1 kb upstream and downstream flanking regions. P value represents Wilcoxon matched pairs  
1164 signed rank test between treated and control groups.

1165  
1166 **Supplementary Table S1** List of plasmids deposited to Addgene, qPCR primers, gRNA  
1167 sequences, bisulfite PCR primers, bisulfite pyrosequencing primers, and DNA regions analyzed  
1168 for methylation.

1169 **Supplementary Table S2** List of hypermethylated DMRs caused by dCas9 methyltransferases  
1170 and uPA gRNAs

1171 **Supplementary Table S3** List of hypomethylated DMRs caused by dCas9 methyltransferases  
1172 and uPA gRNAs

1173  
1174 **Supplementary Table S4** List of hypermethylated DMRs caused by dCas9 methyltransferases  
1175 and TGFBR3 gRNAs

1176  
1177 **Supplementary Table S5** List of hypomethylated DMRs caused by dCas9 methyltransferases  
1178 and TGFBR3 gRNAs

1  
2  
3  
4 1179  
5  
6 1180 **Supplementary Table S6** List of binding peaks caused by dCAs9-BFP-DNMT3A and uPA  
7 1181 gRNAs  
8  
9 1182  
10 1183 **Supplementary File 1 Extended discussion and results**  
11  
12 1184  
13  
14  
15  
16  
17  
18  
19  
20  
21  
22  
23  
24  
25  
26  
27  
28  
29  
30  
31  
32  
33  
34  
35  
36  
37  
38  
39  
40  
41  
42  
43  
44  
45  
46  
47  
48  
49  
50  
51  
52  
53  
54  
55  
56  
57  
58  
59  
60  
61  
62  
63  
64  
65

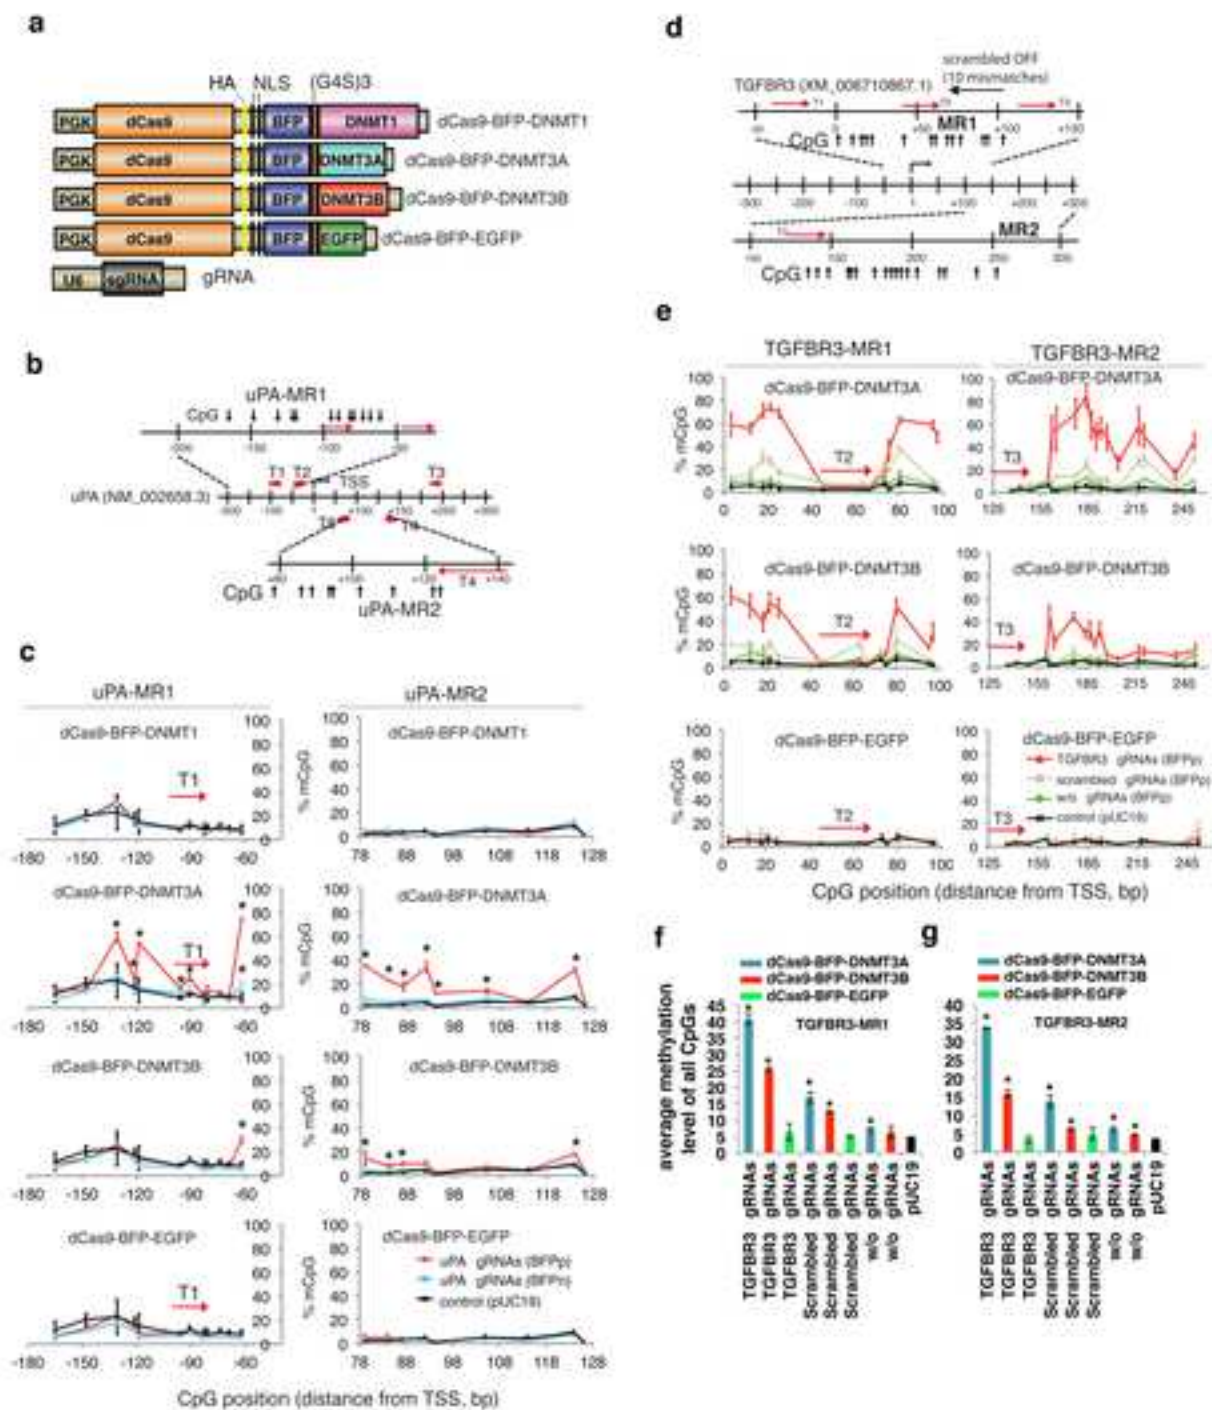



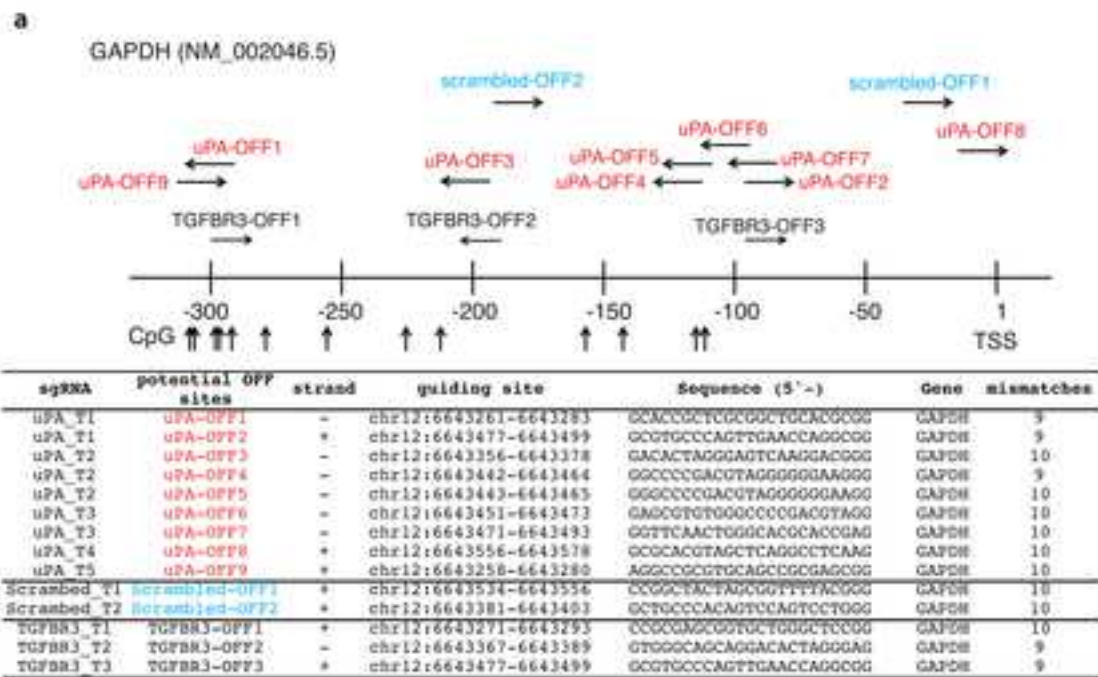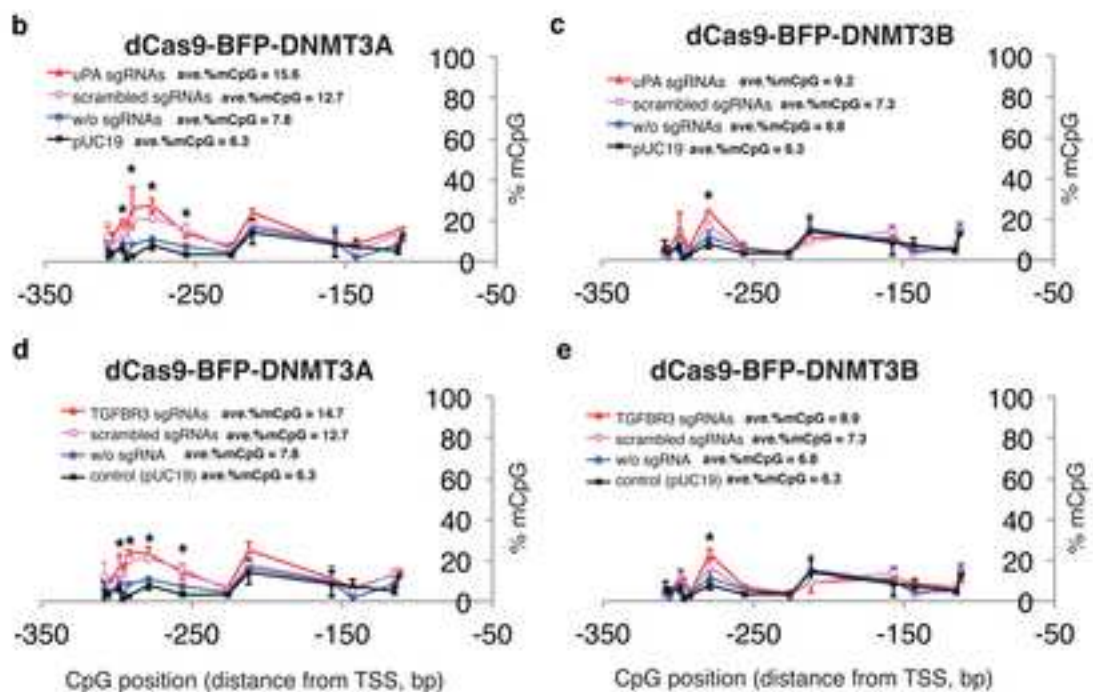

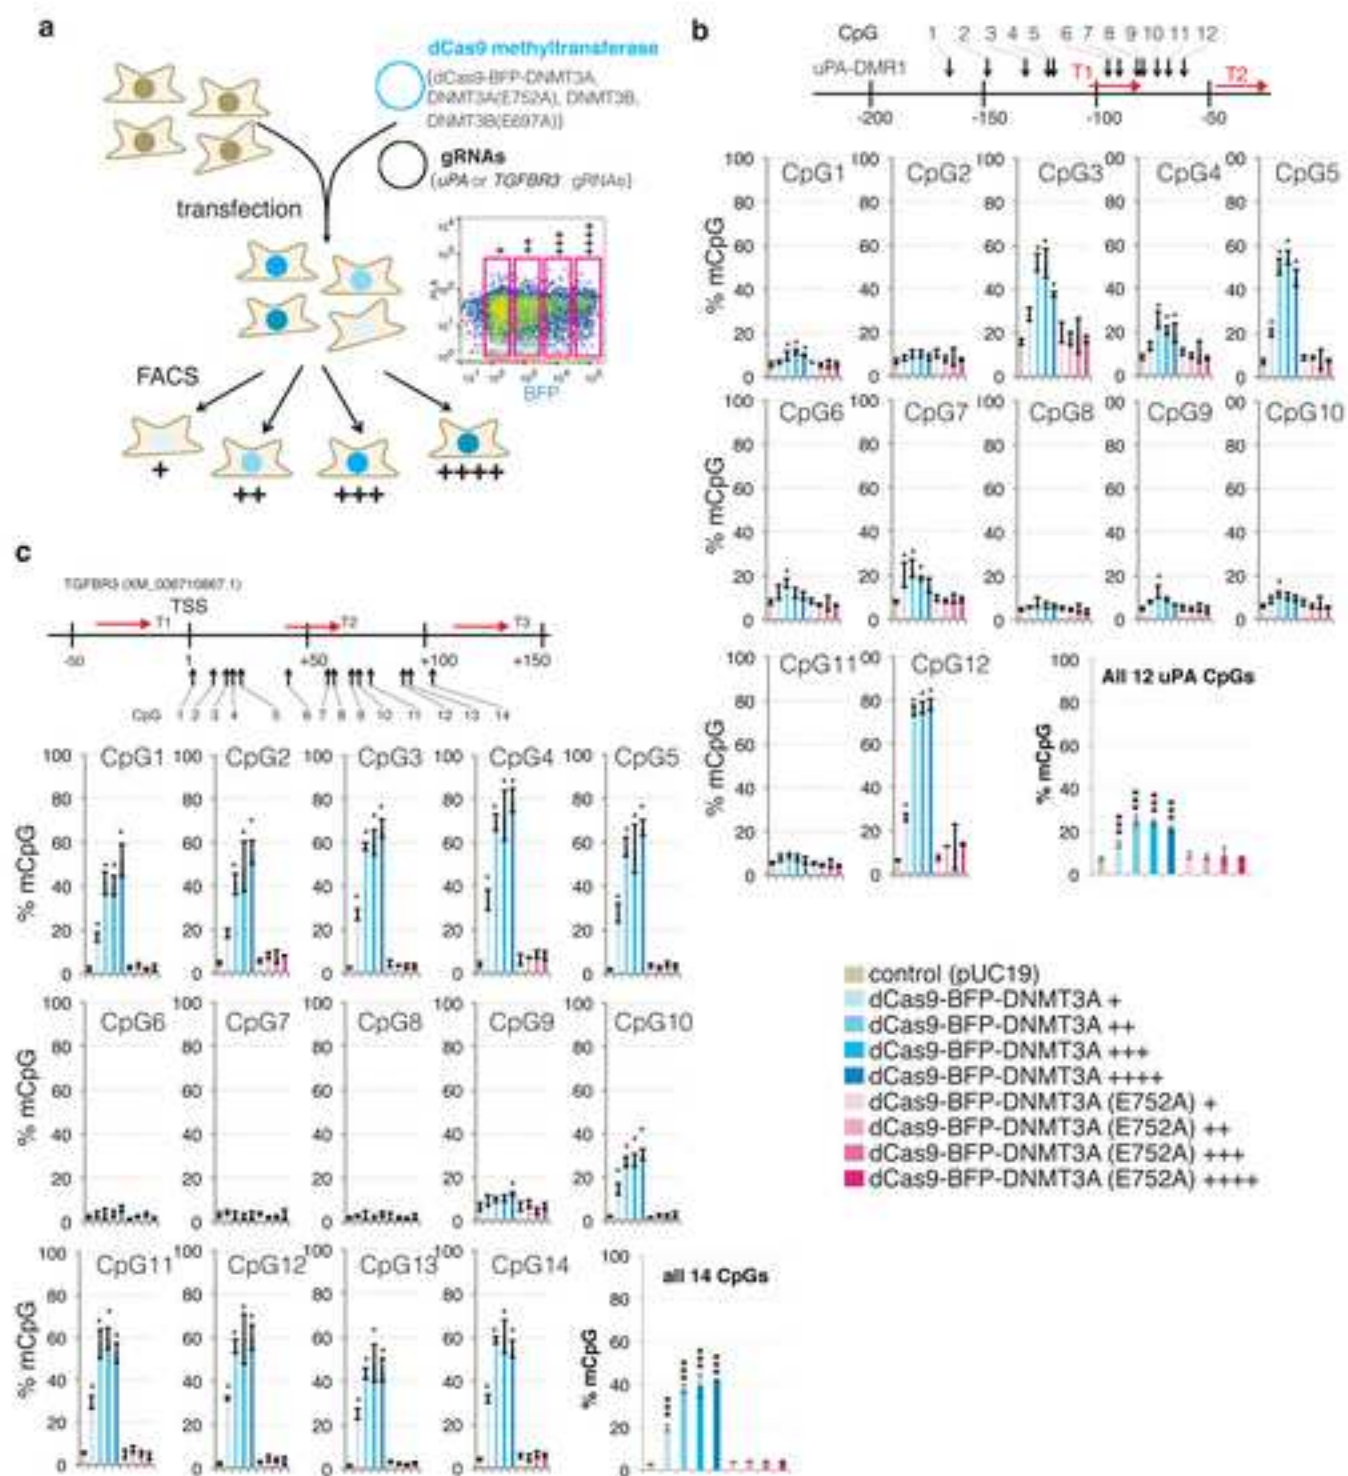

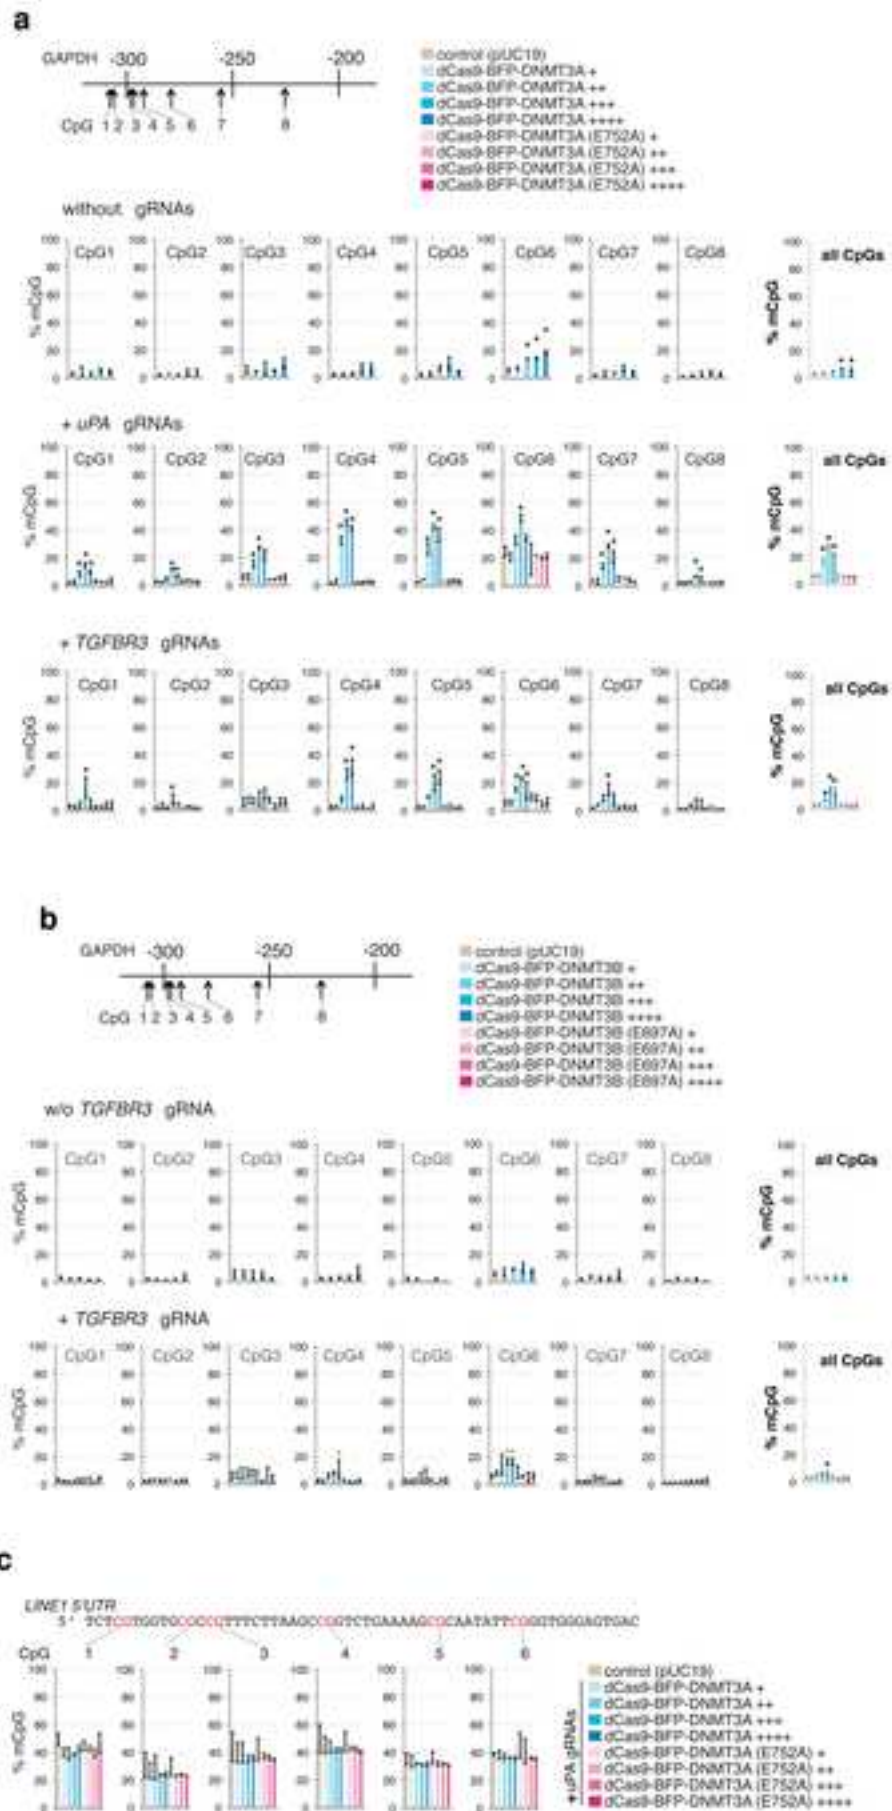

Fig. 5

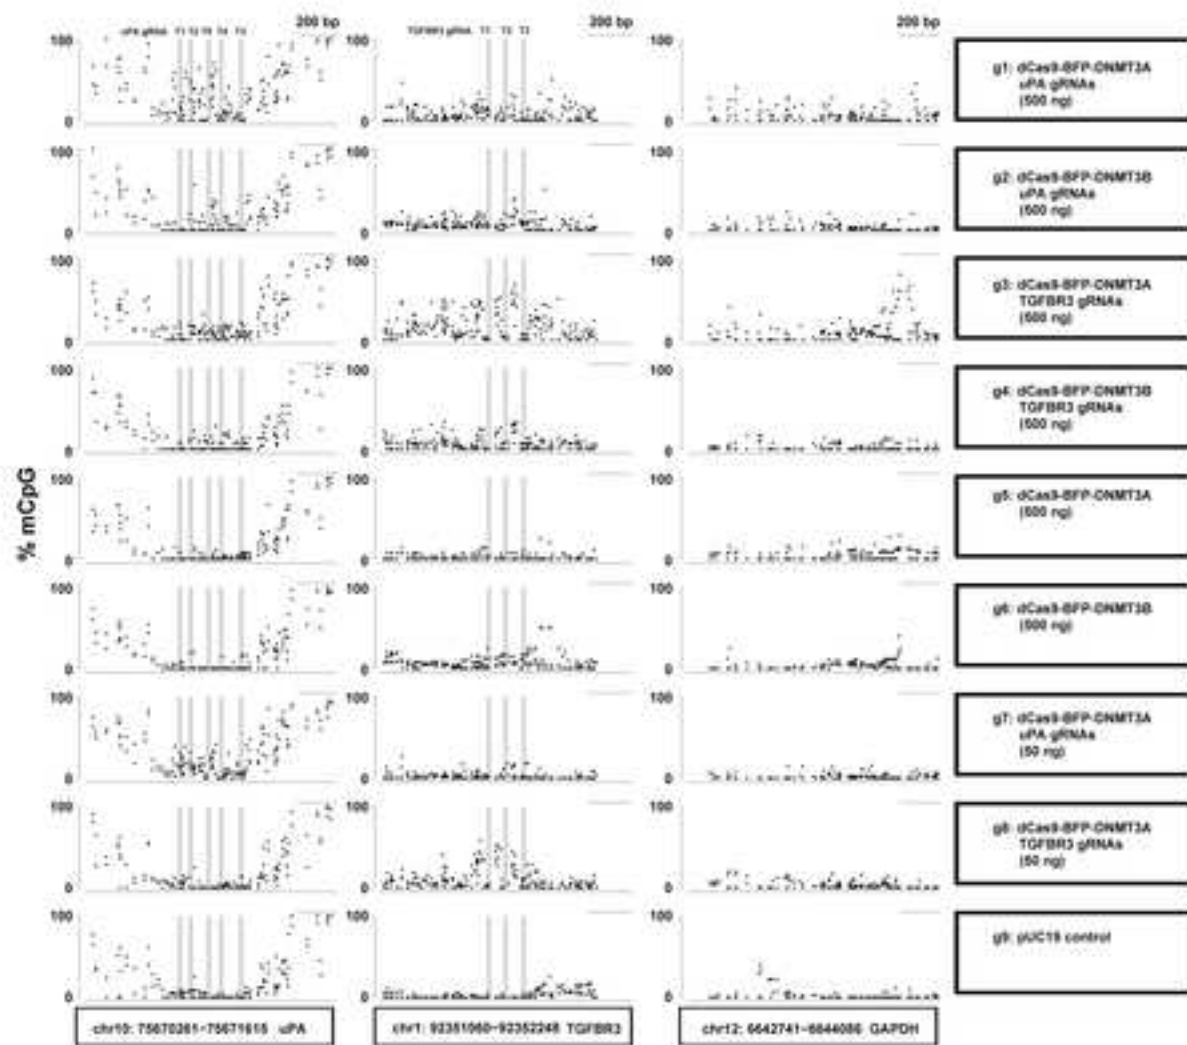

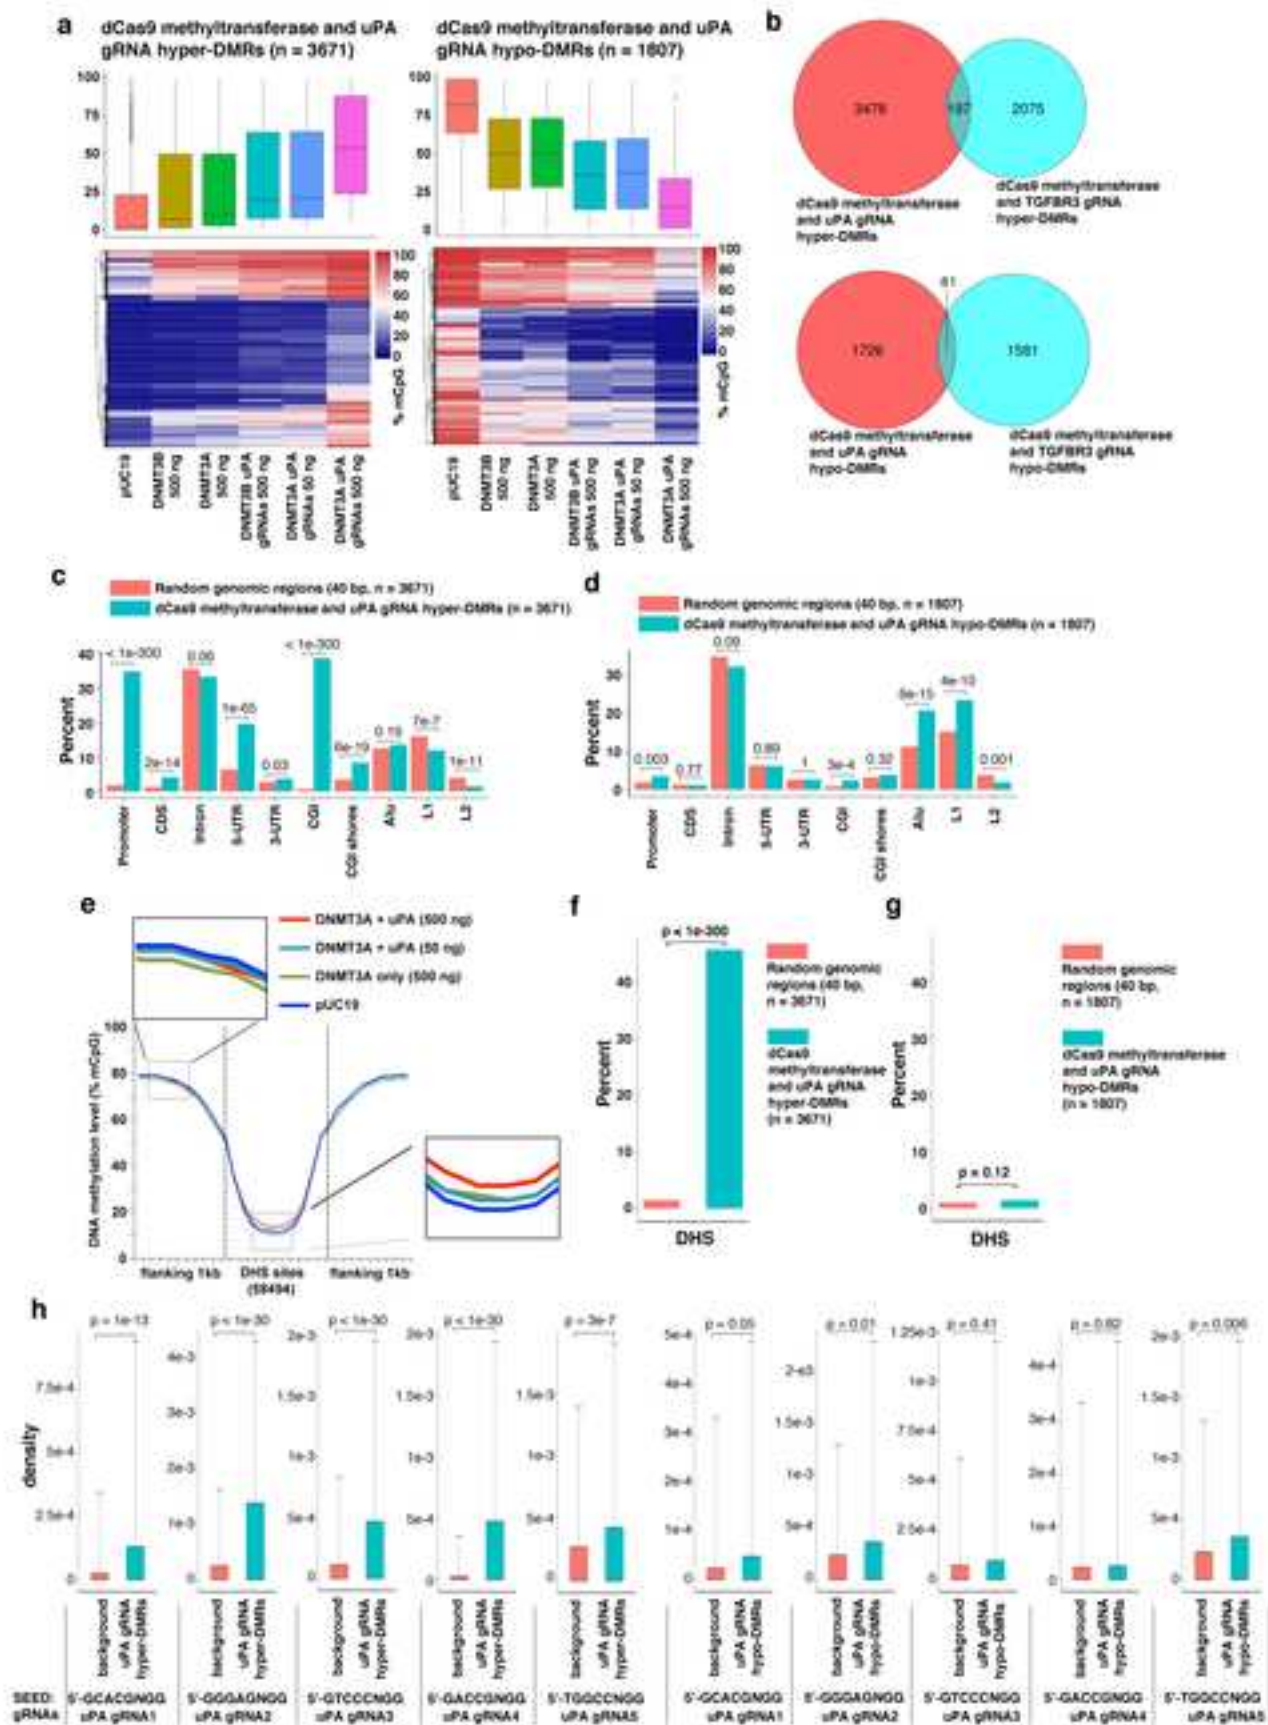

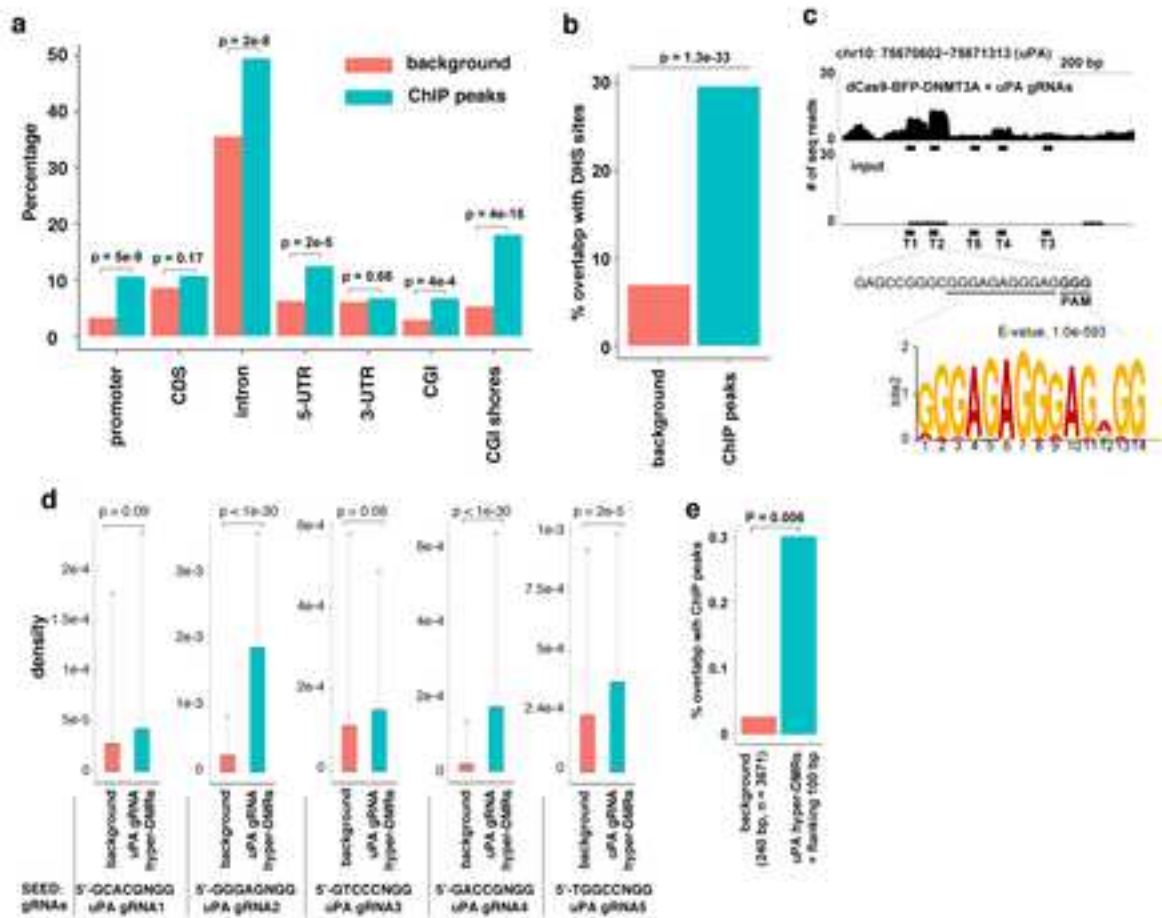

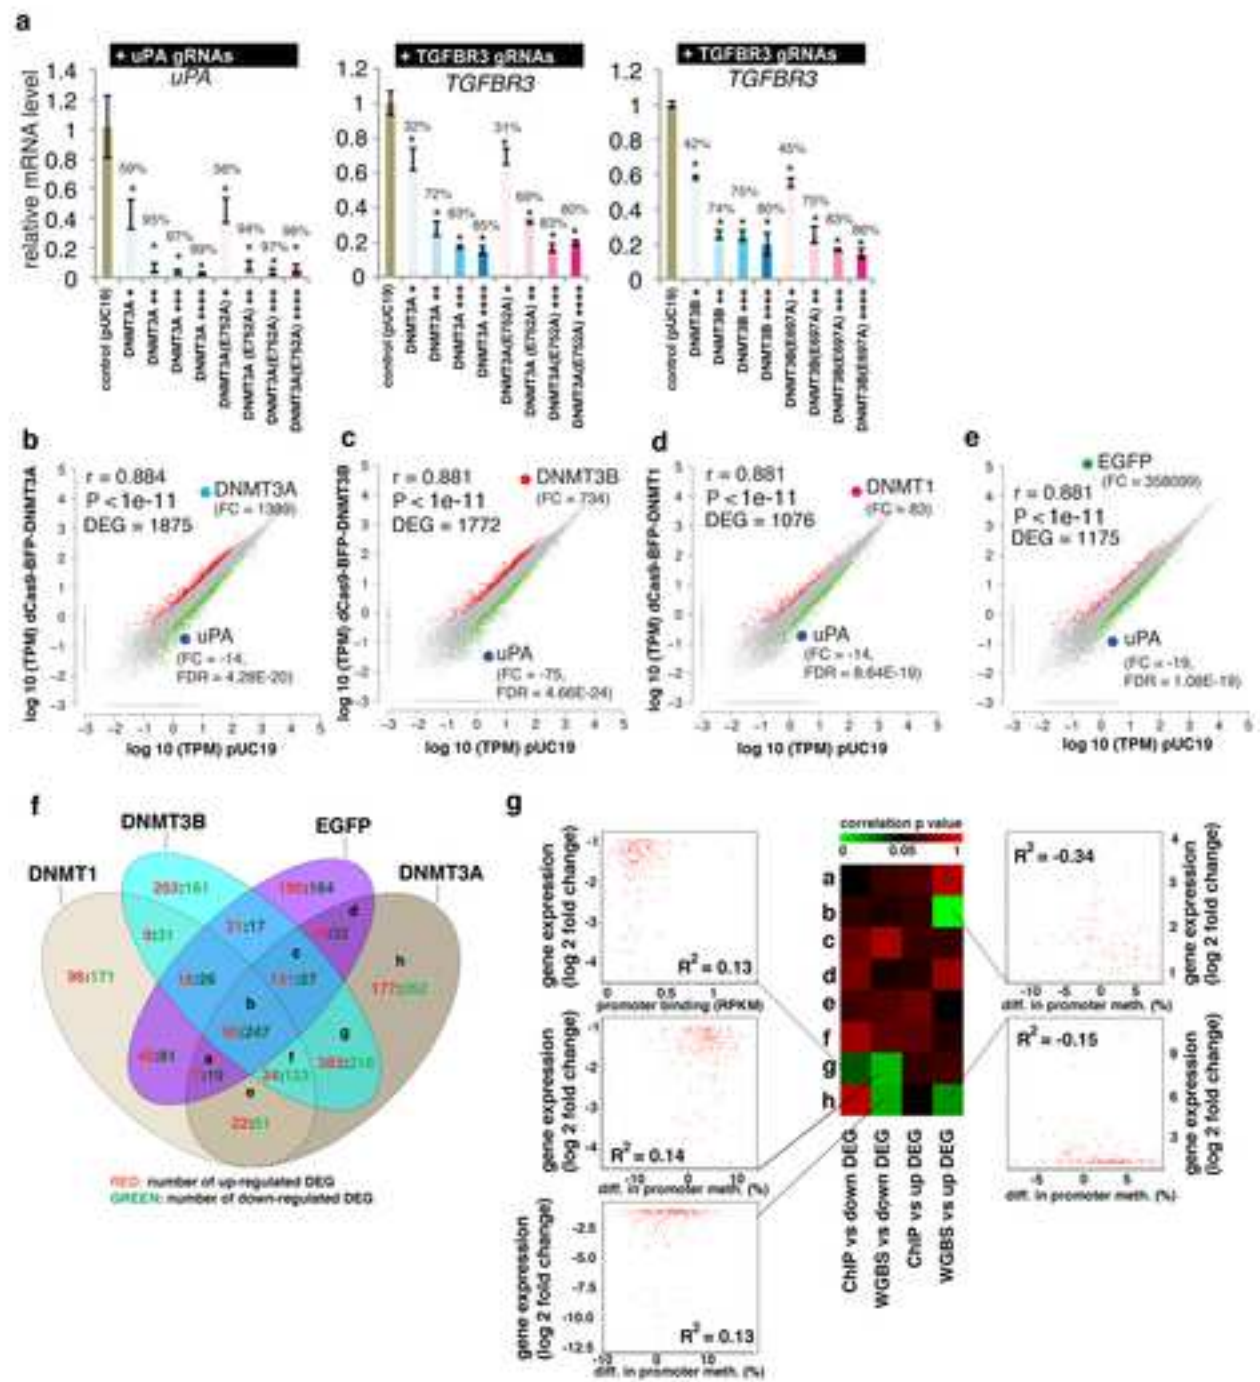

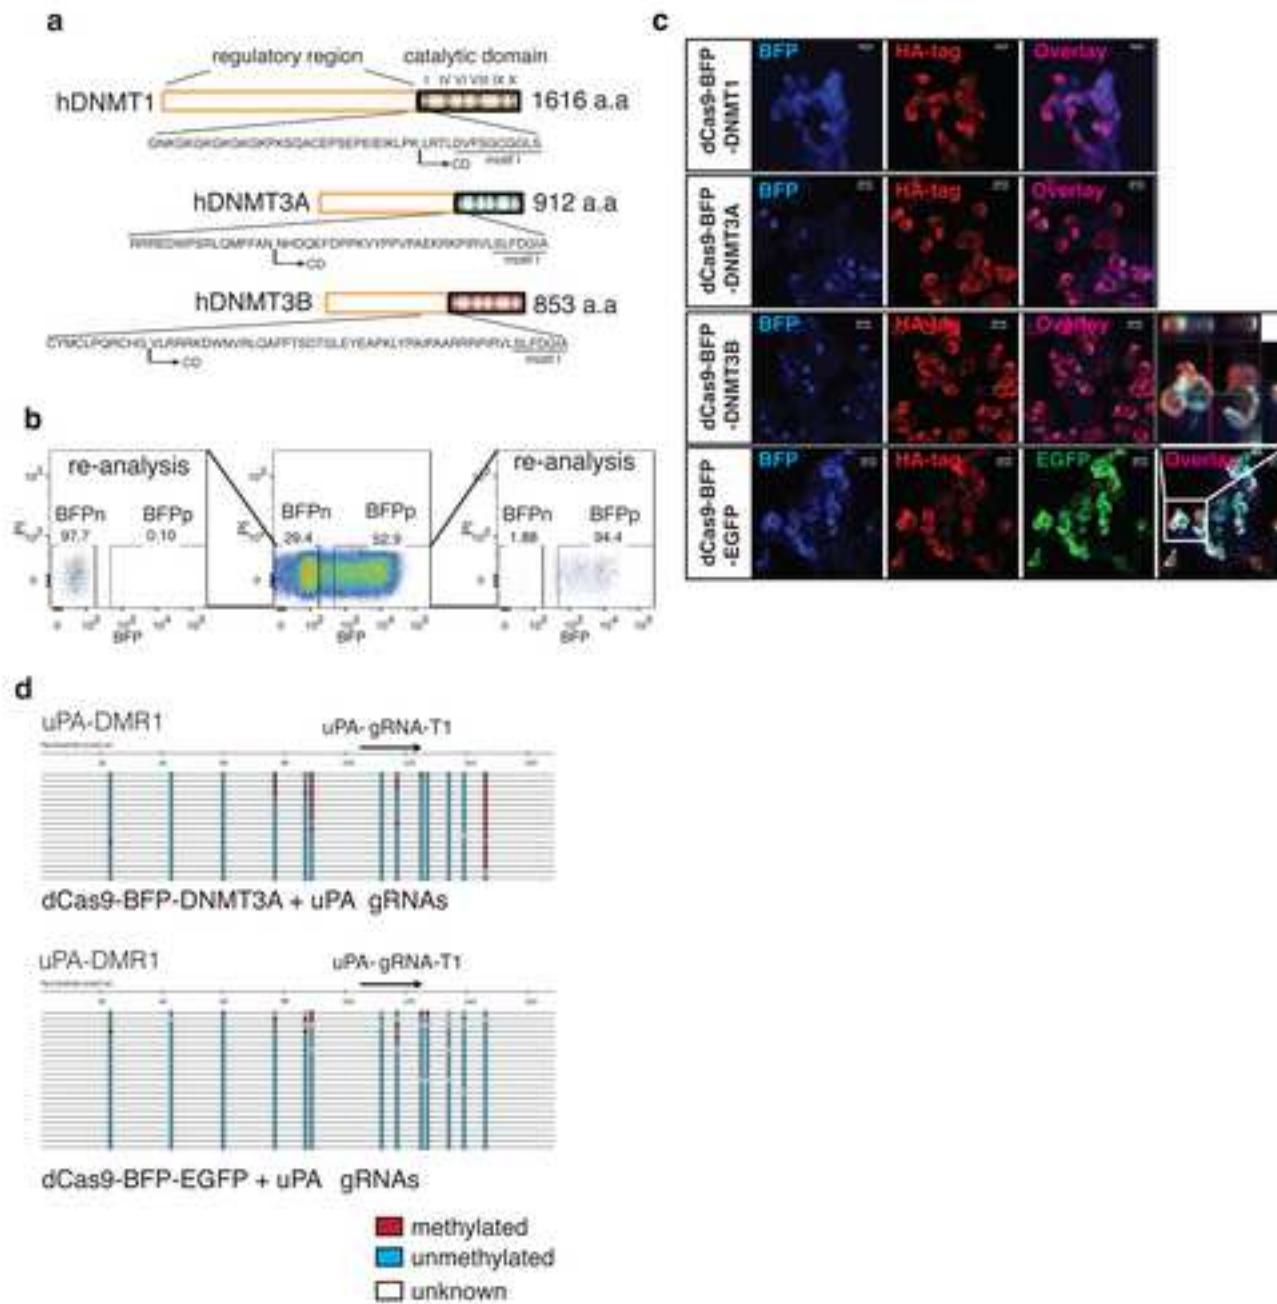



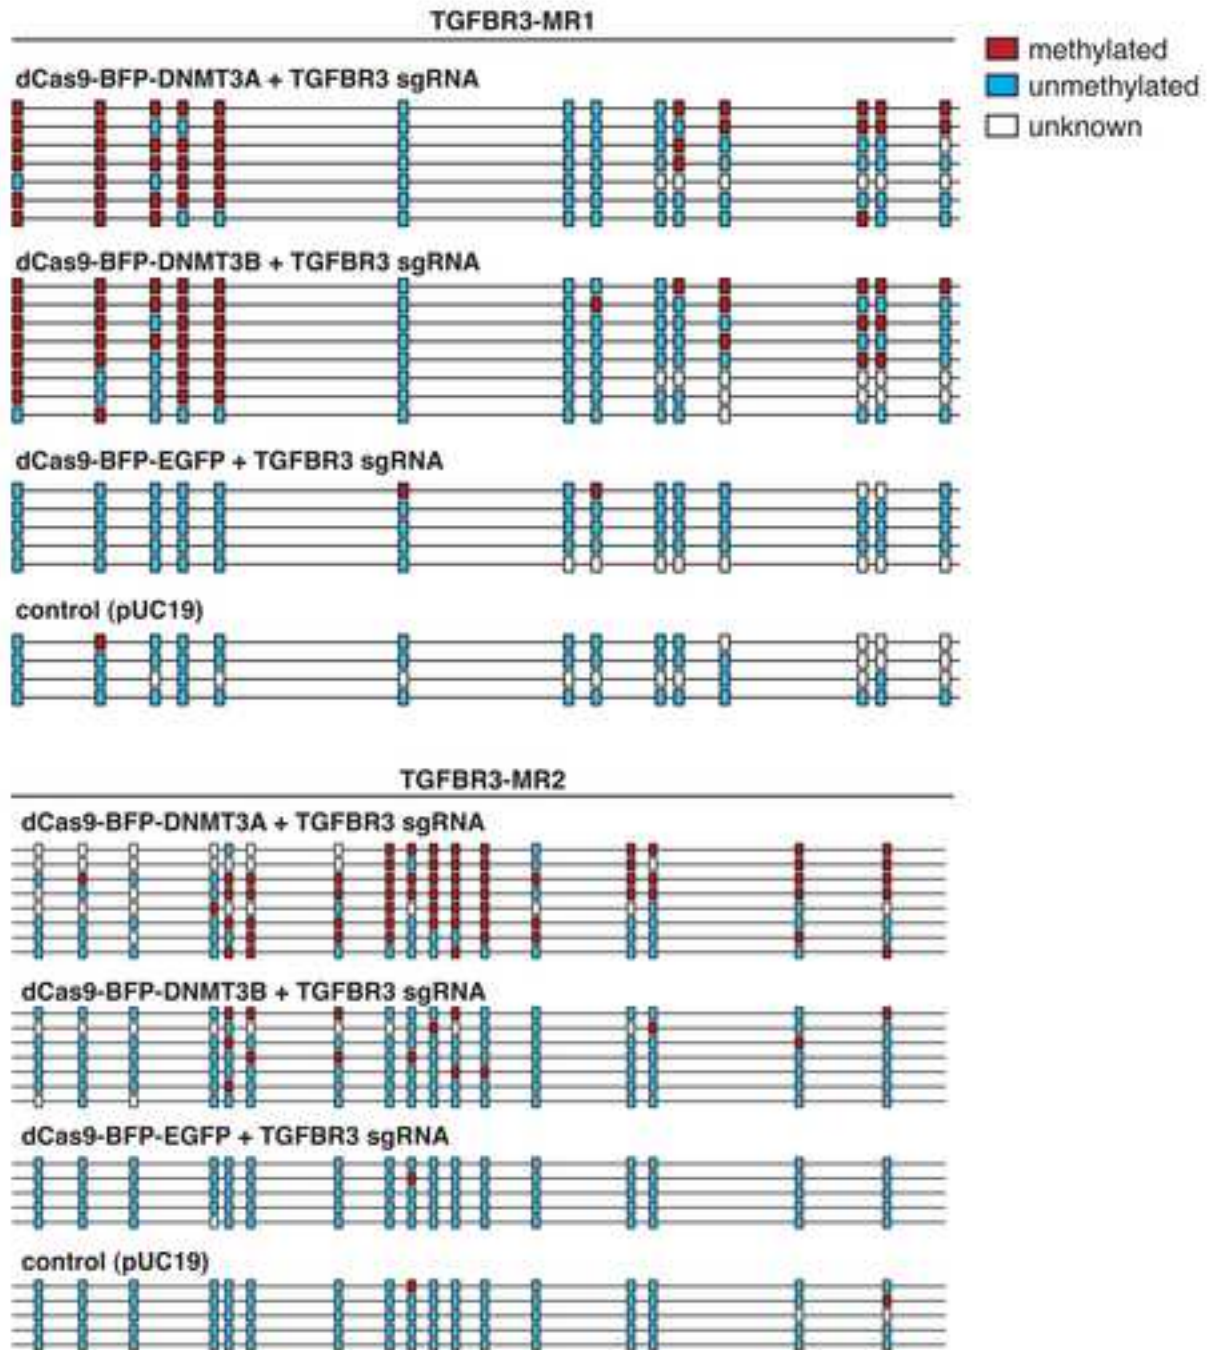

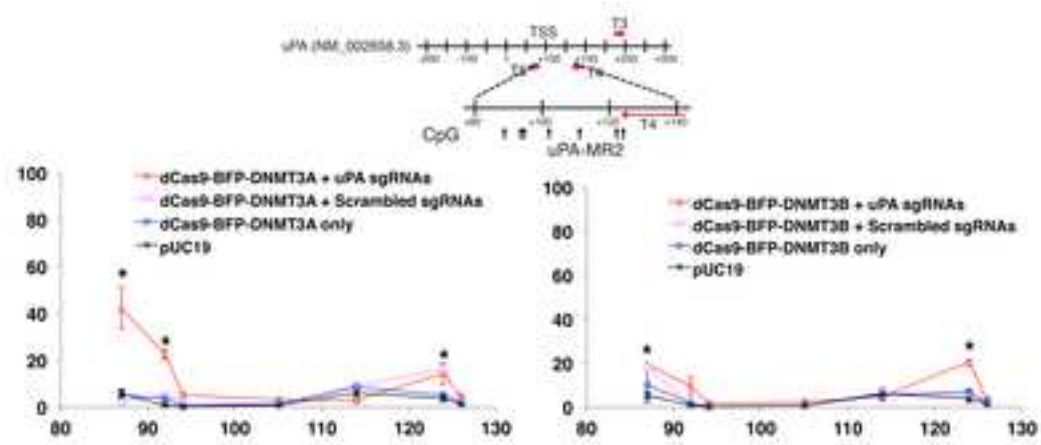

**a**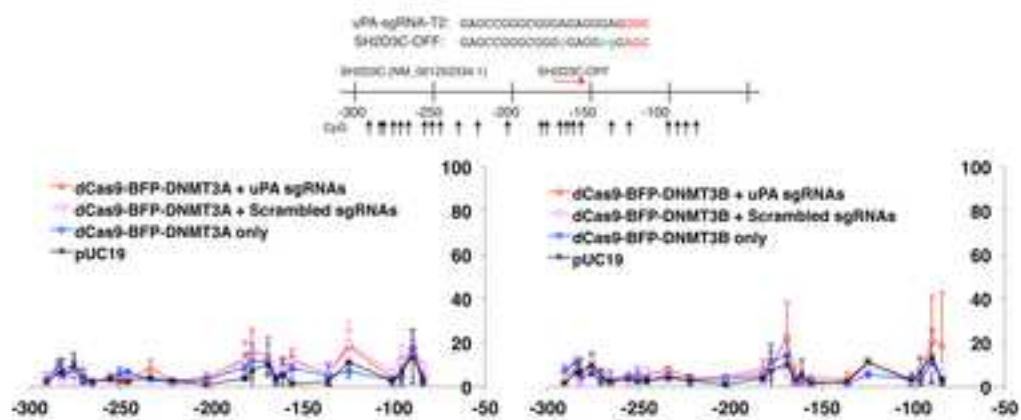**b**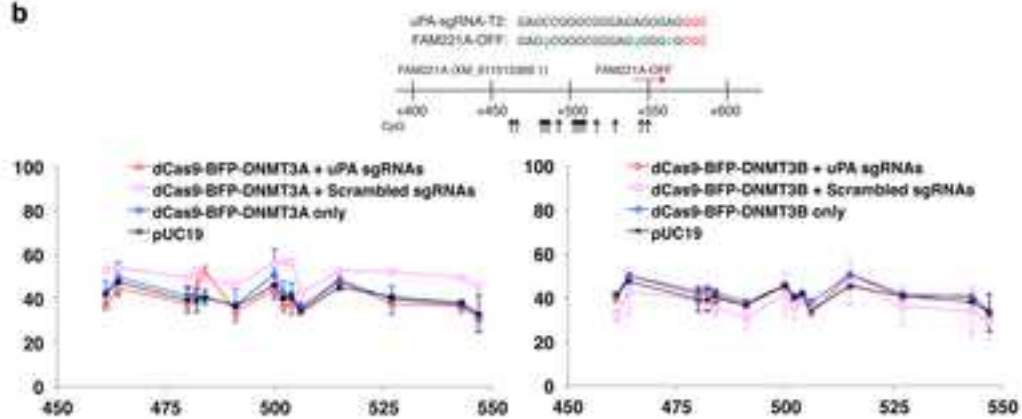

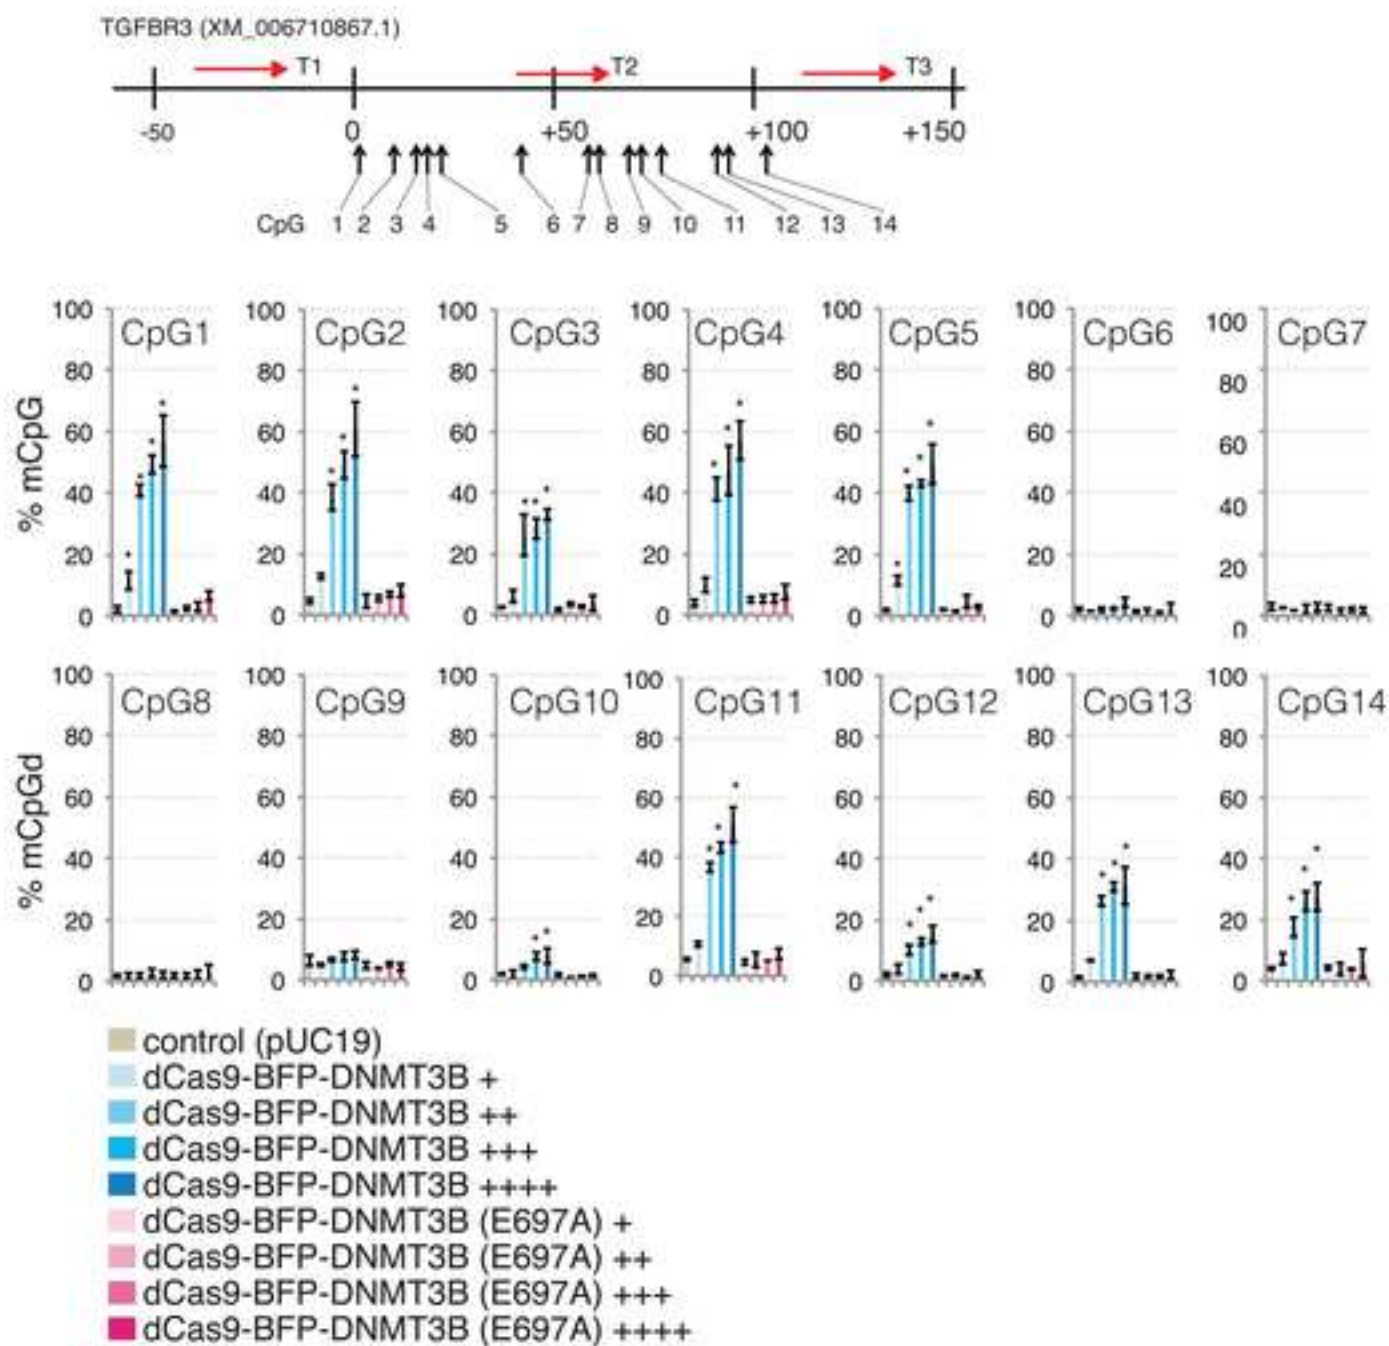

**a**

| Sample ID | Description                                       | Clean Data Size(bp) | Clean Reads Number | Clean Rate(%) | Mapped Reads | Mapping Rate (%) | Uniquely Mapped Reads | Uniquely Mapping Rate (%) | Bisulfite Conversion Rate (%) |
|-----------|---------------------------------------------------|---------------------|--------------------|---------------|--------------|------------------|-----------------------|---------------------------|-------------------------------|
| g1        | dCas9-BFP-DNMT3A (500 ng) + uPA gRNAs (500 ng)    | 100,601,409,600     | 670,676,064        | 95.06         | 558316453    | 83.25            | 558316453             | 83.25                     | 99.63                         |
| g2        | dCas9-BFP-DNMT3B (500 ng) + uPA gRNAs (500 ng)    | 103,778,694,600     | 691,857,964        | 95.64         | 575422550    | 83.17            | 575422550             | 83.17                     | 99.52                         |
| g3        | dCas9-BFP-DNMT3A (500 ng) + TGFBR3 gRNAs (500 ng) | 117,505,796,100     | 783,371,974        | 94.06         | 651431832    | 83.16            | 651431832             | 83.16                     | 99.65                         |
| g4        | dCas9-BFP-DNMT3B (500 ng) + TGFBR3 gRNAs (500 ng) | 109,001,895,600     | 726,679,304        | 90.85         | 604104613    | 83.13            | 604104613             | 83.13                     | 99.63                         |
| g5        | dCas9-BFP-DNMT3A (500 ng) only                    | 105,265,839,000     | 701,772,260        | 90.36         | 562464794    | 83               | 562464794             | 83                        | 99.62                         |
| g6        | dCas9-BFP-DNMT3B (500 ng) only                    | 118,394,522,400     | 789,296,816        | 95.6          | 660303371    | 83.66            | 660303371             | 83.66                     | 99.6                          |
| g7        | dCas9-BFP-DNMT3A (50 ng) + uPA gRNAs (50 ng)      | 117,366,362,100     | 762,442,414        | 67.18         | 645181340    | 82.46            | 645181340             | 82.46                     | 99.6                          |
| g8        | dCas9-BFP-DNMT3A (50 ng) + TGFBR3 gRNAs (50 ng)   | 101,372,416,500     | 675,616,110        | 65.25         | 561172295    | 83.04            | 561172295             | 83.04                     | 99.49                         |
| g9        | pUC19 control                                     | 80,429,413,600      | 536,196,092        | 90.08         | 444407297    | 82.88            | 444407297             | 82.88                     | 99.46                         |

**b**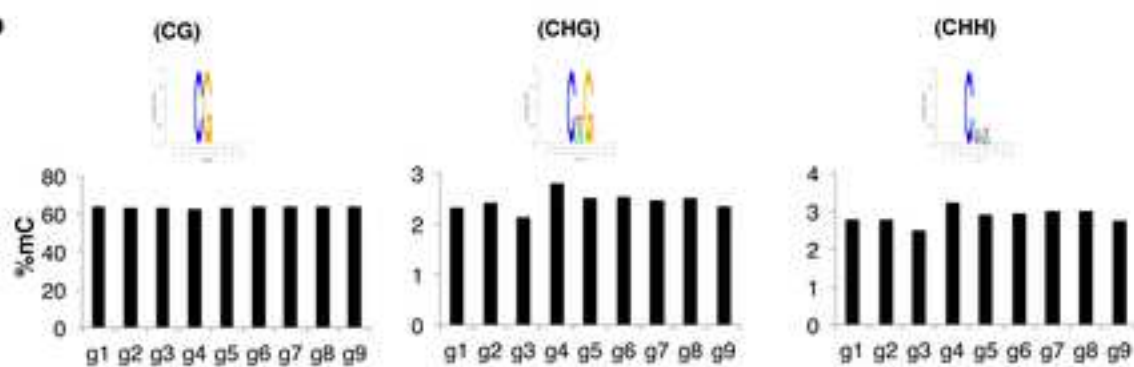**c**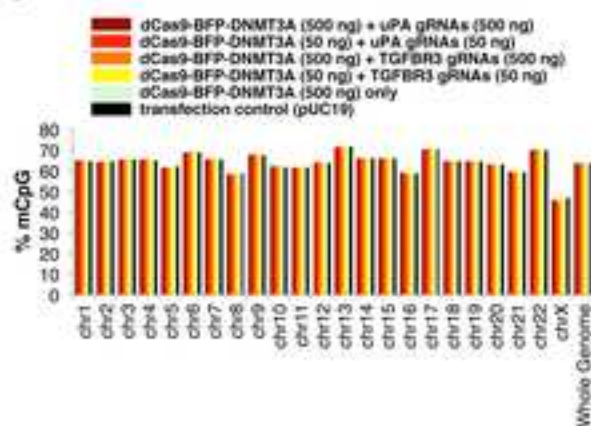**d**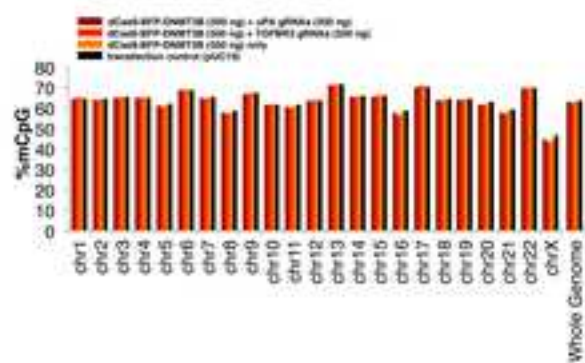

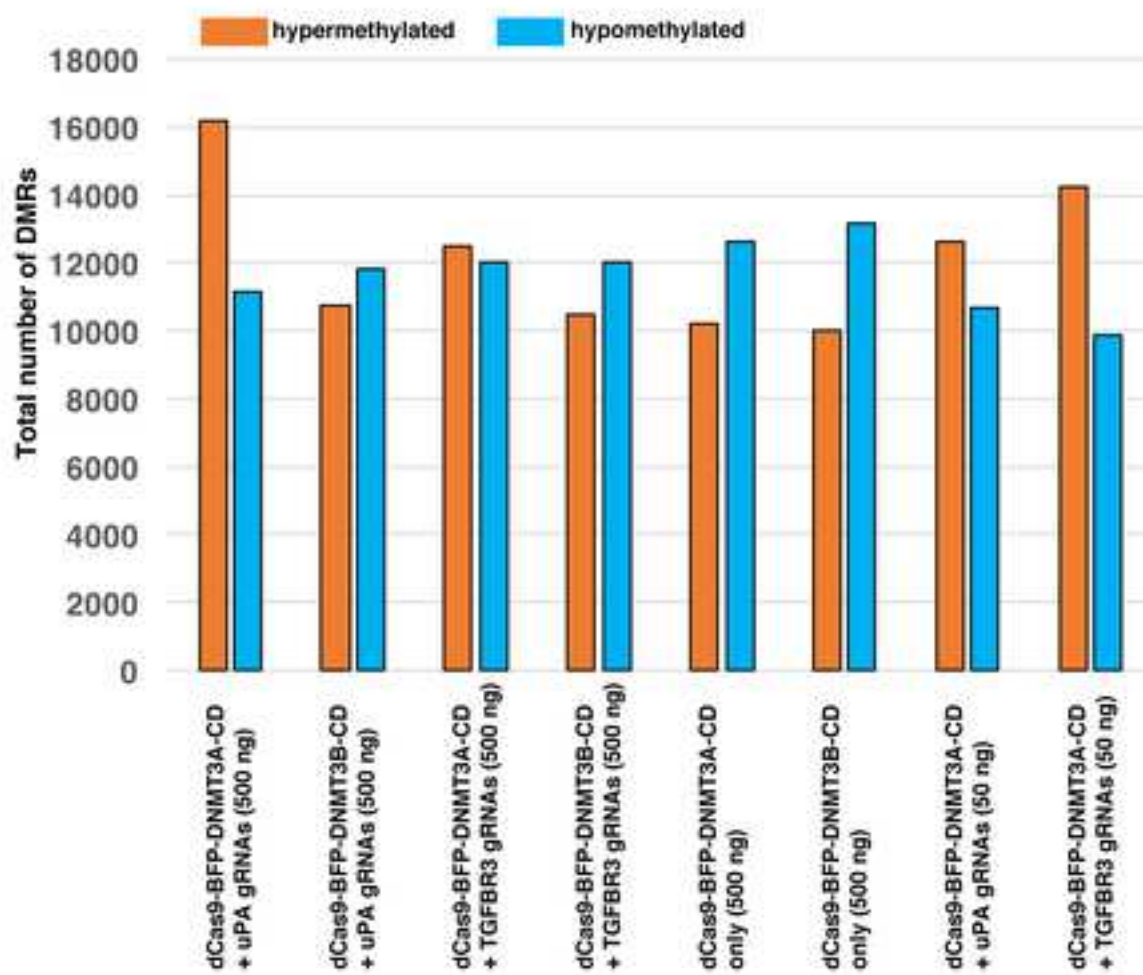

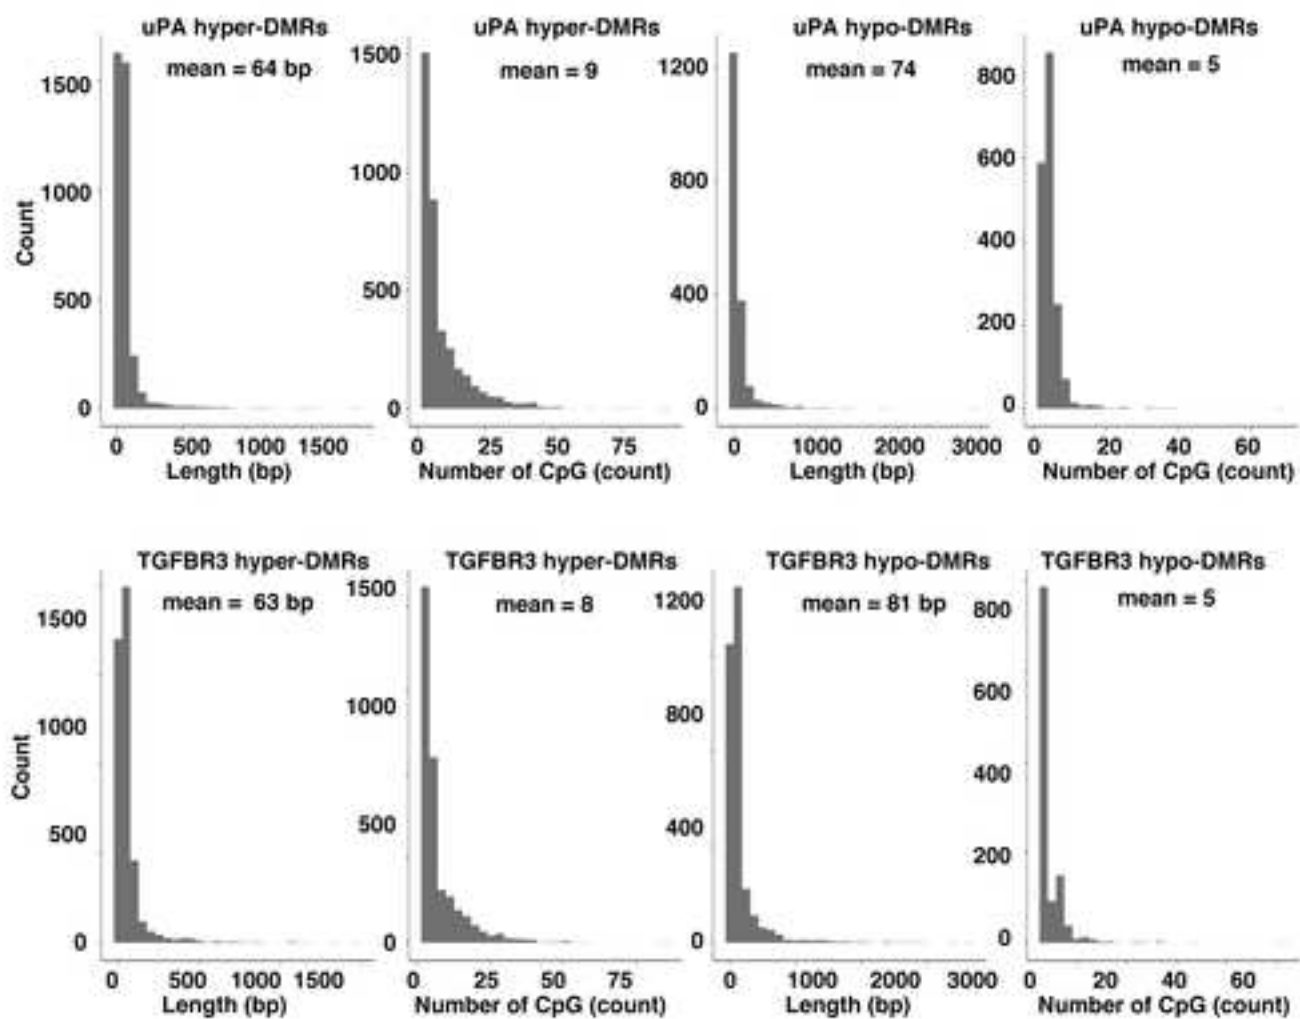

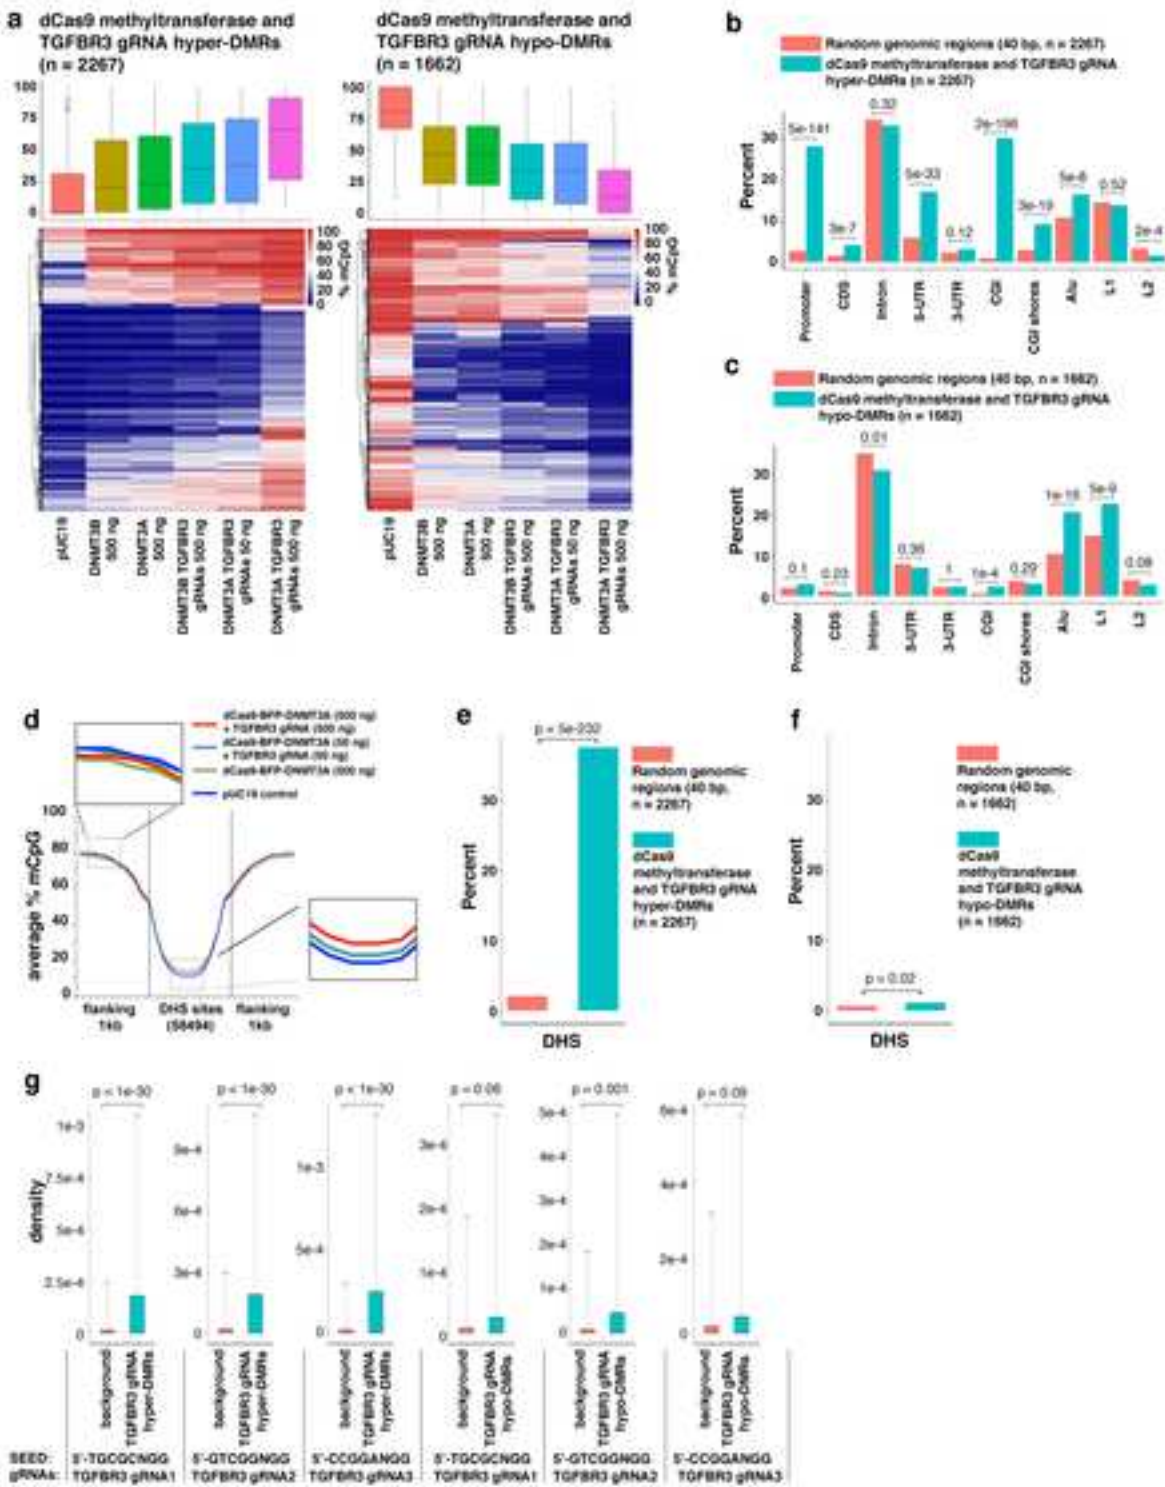



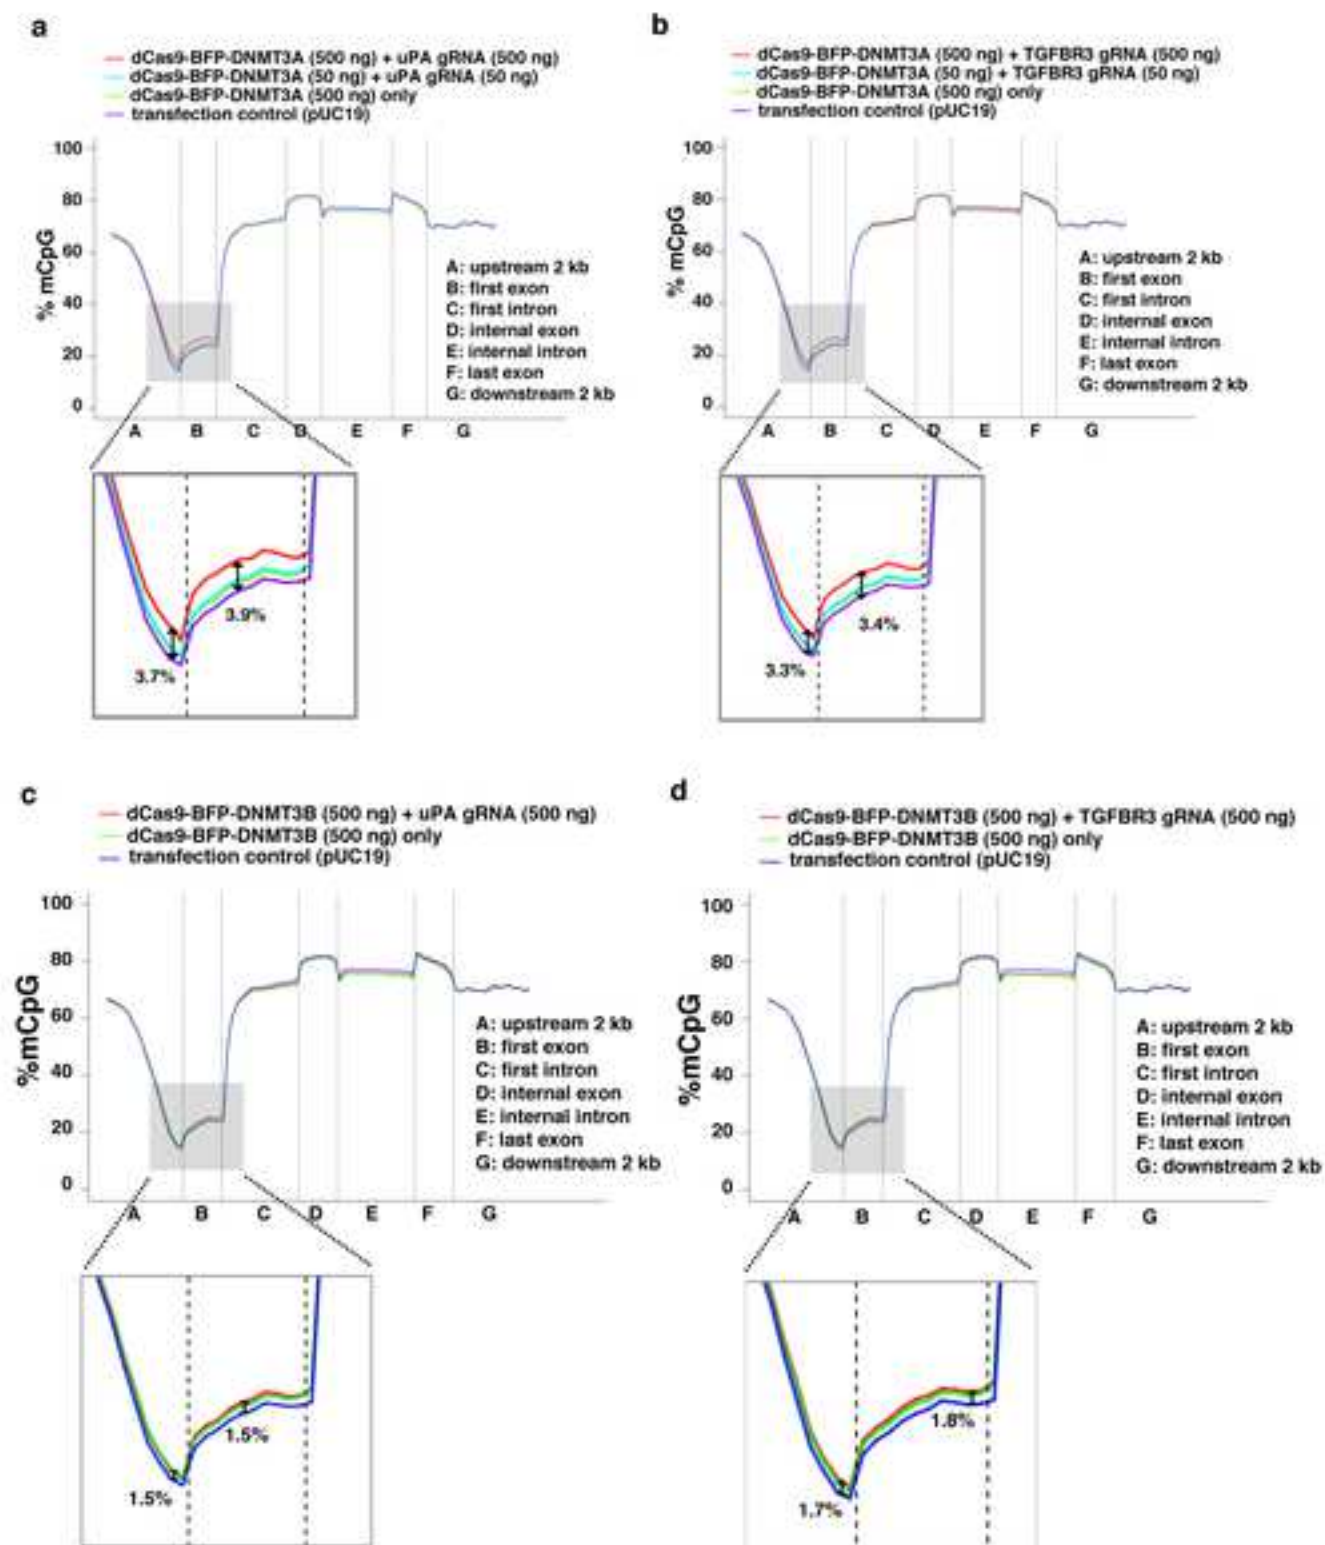

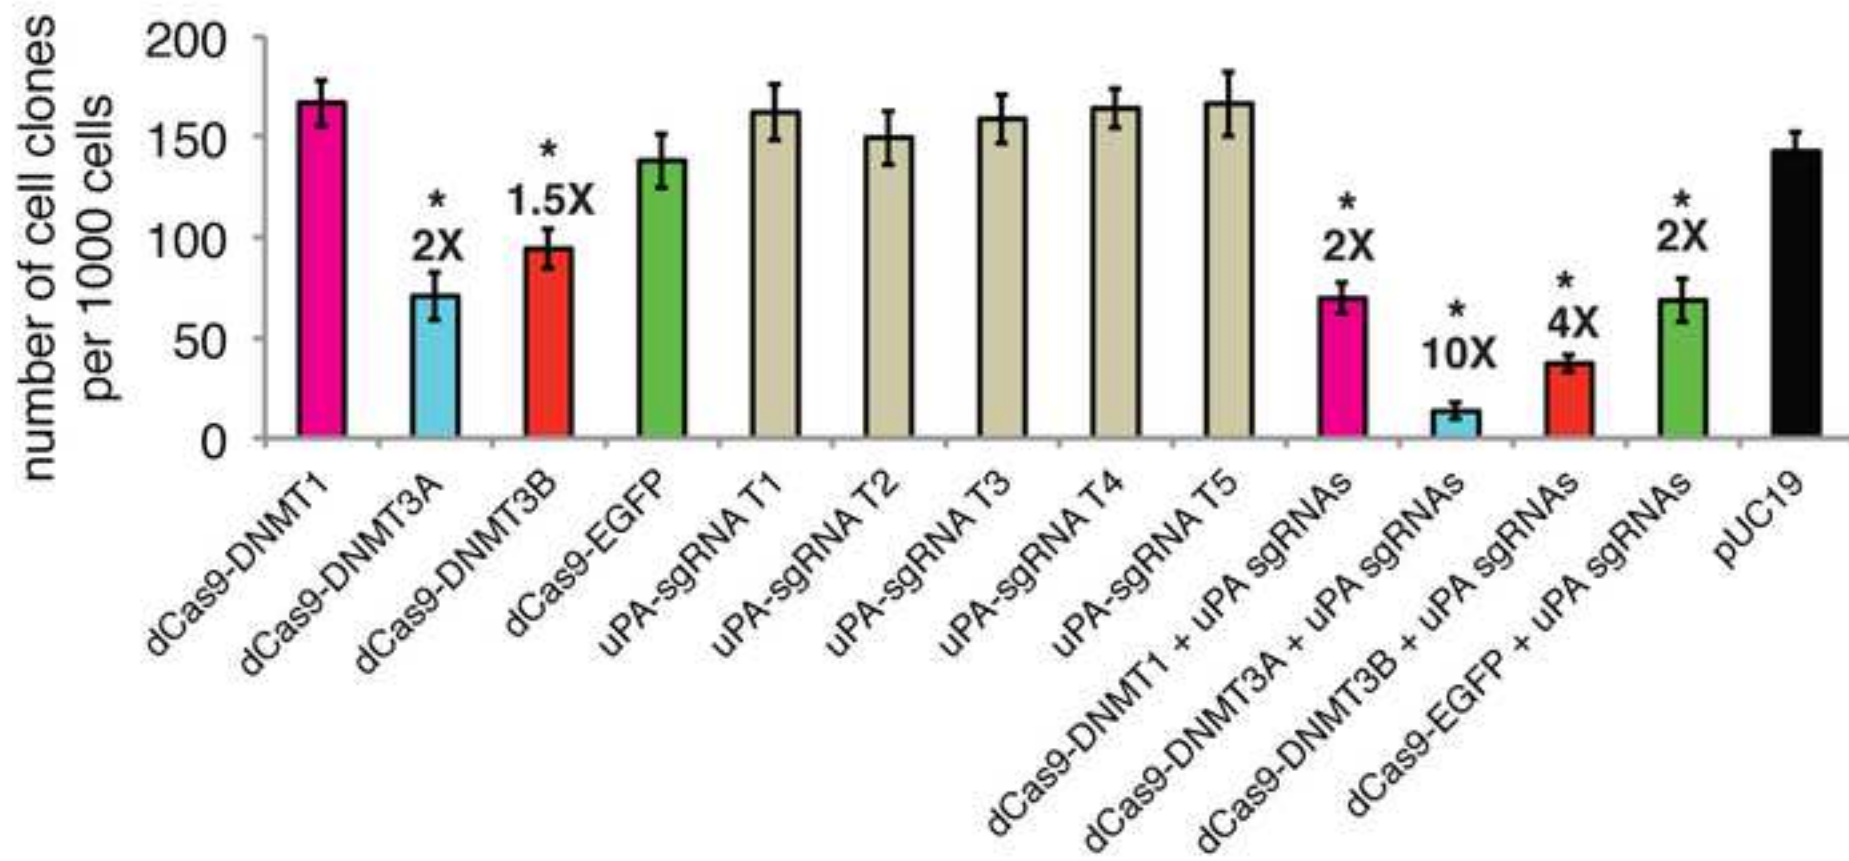

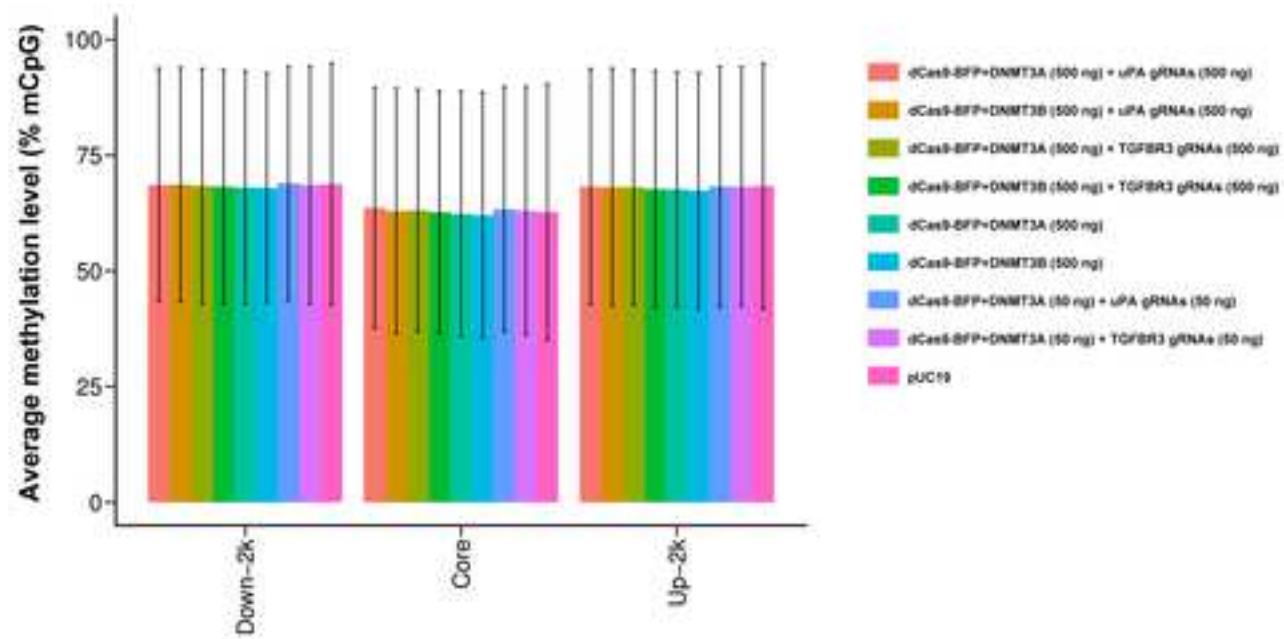

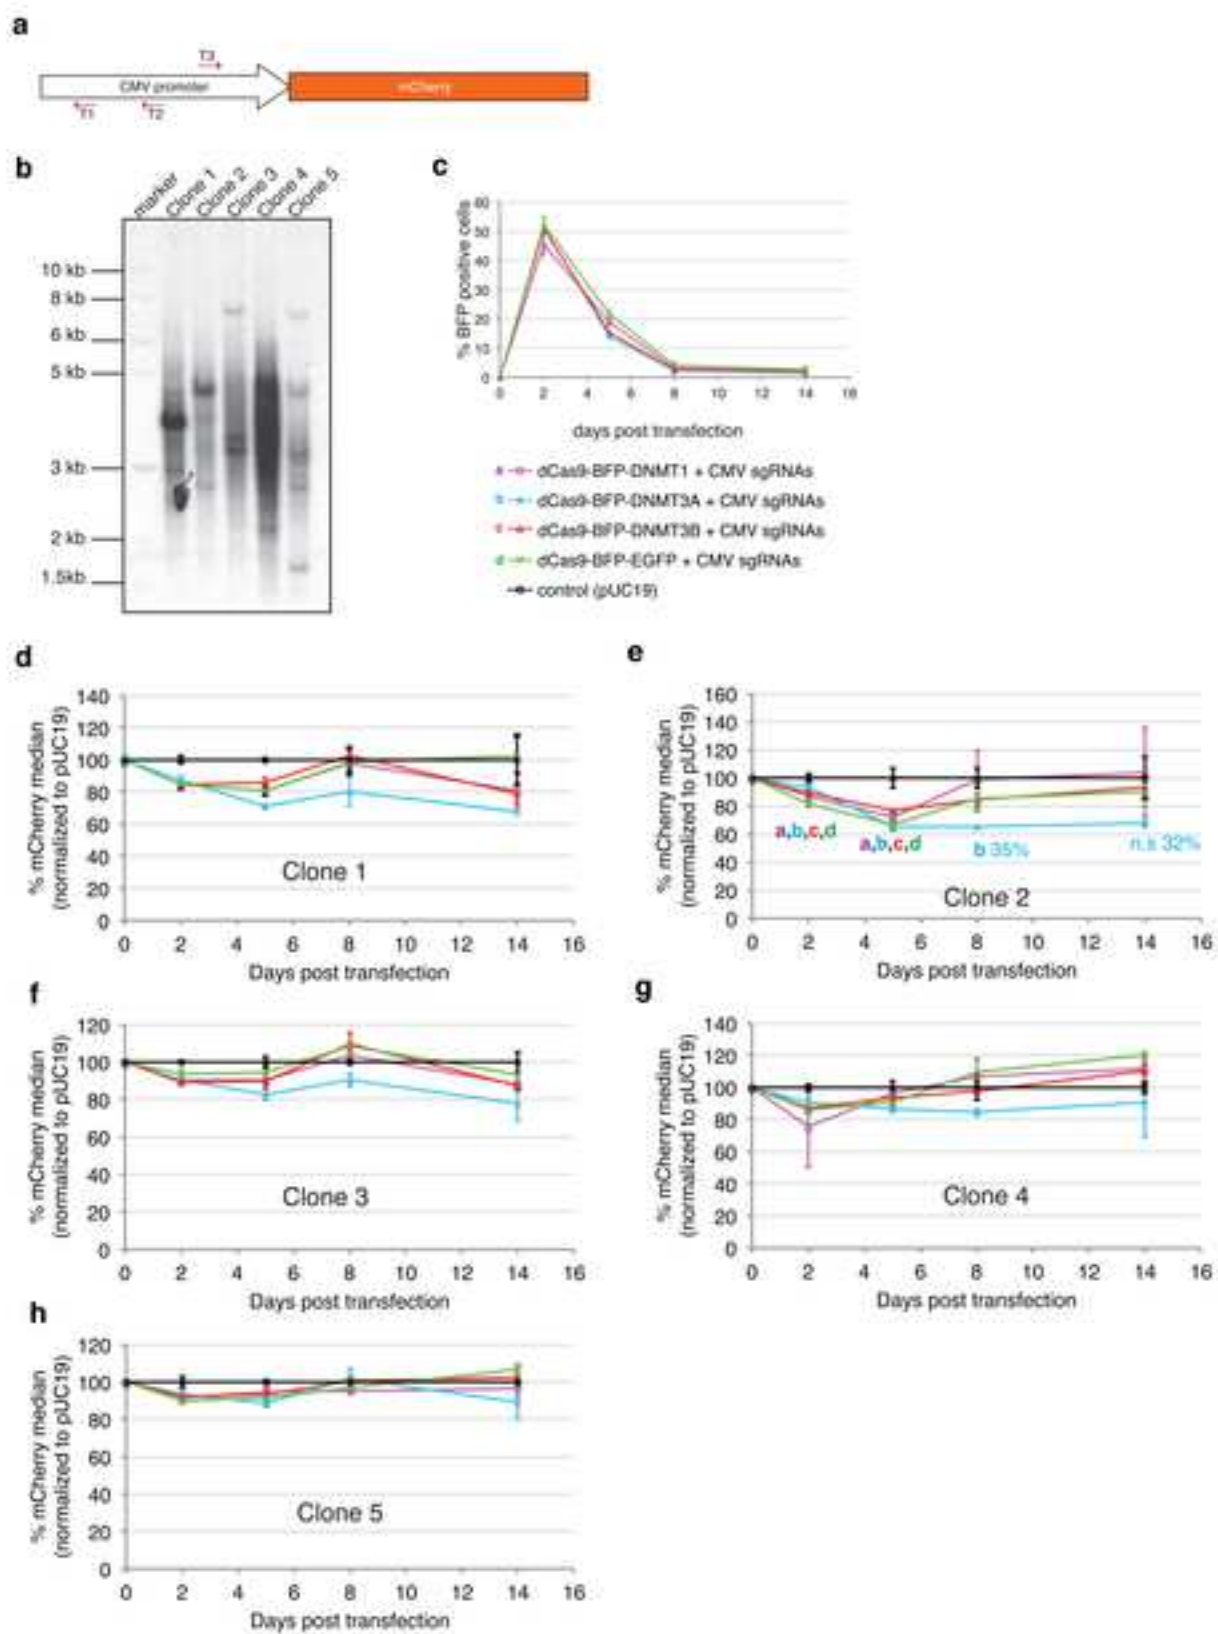

## Supplementary Figure 14

## A. Hyper-DMRs (n = 3671)

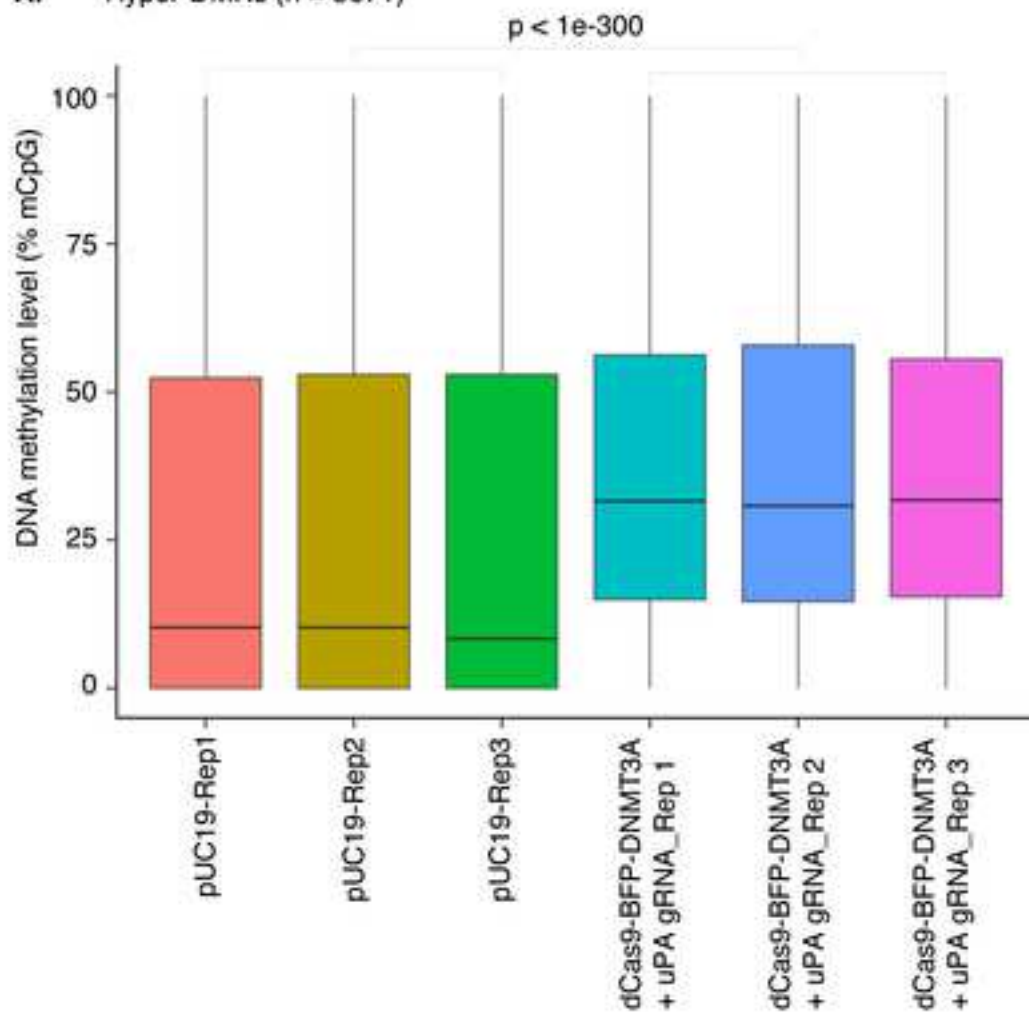

## B.

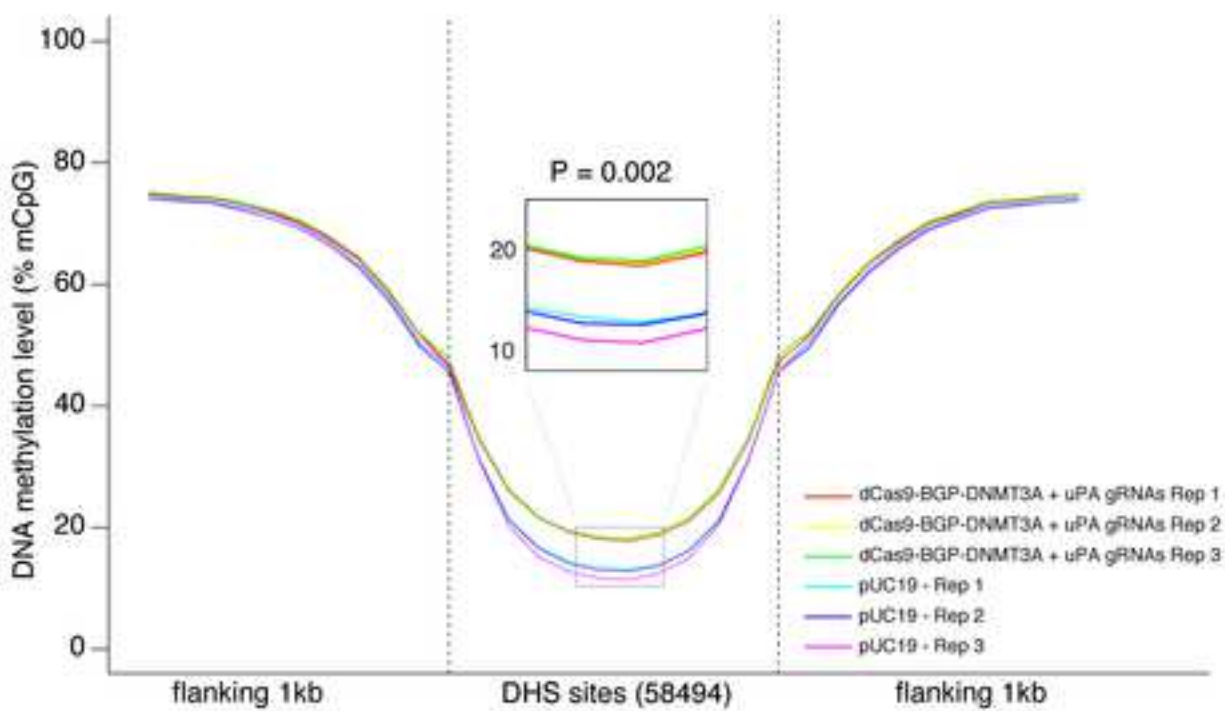

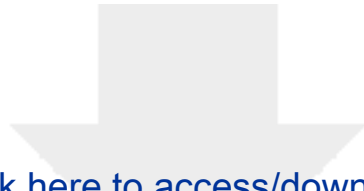

Click here to access/download  
**Supplementary Material**  
Supplementary Table S1.docx

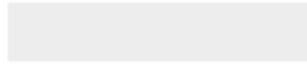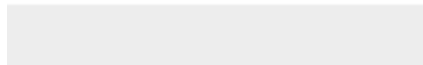

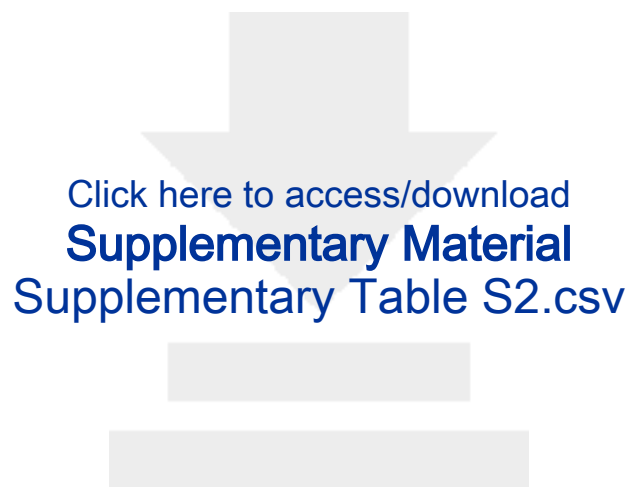

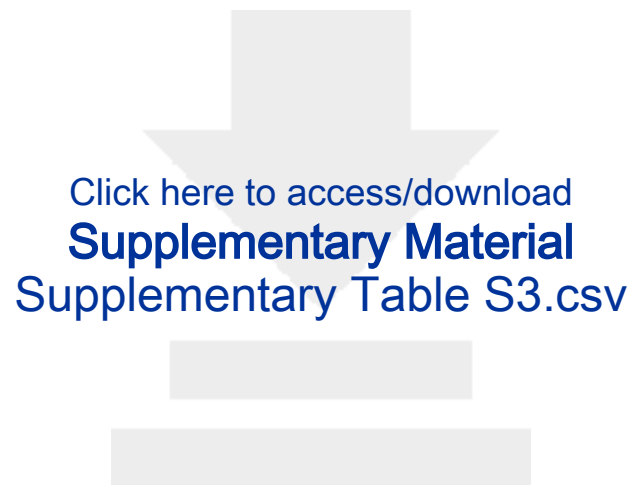



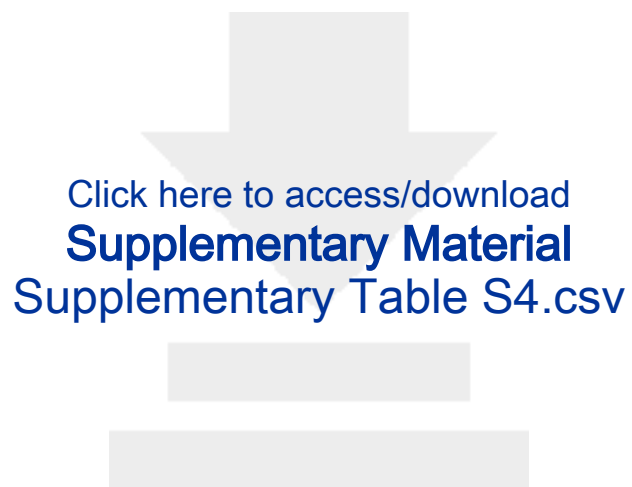

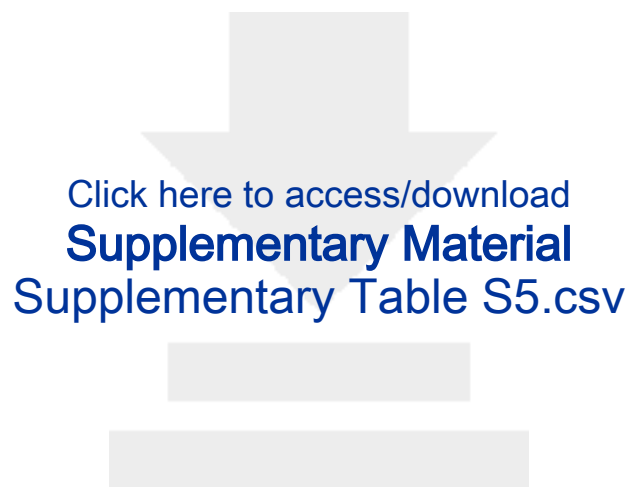



Click here to access/download  
**Supplementary Material**  
Supplementary Table S6.csv
