# Supplementary material for: Genome-wide determination of on-target and off-target characteristics for RNA-guided DNA methylation by dCas9 methyltransferases
Source: Oxford University Press journal article supplement (doi:10.1093/gigascience/giy011), 2018-02-19
Supplement: giy011_response_to_reviewer_comments_revision_2.pdf [file giy011_response_to_reviewer_comments_revision_2.pdf]

## **Author's Response To Reviewer Comments**

---

Dear Editor and Reviewers,

Thanks again for the constructive comments and the approval of our study. We have now include a paragraph in the discussion section describing the difference in off-target effects between Cas9 and dCas9 methyltransferases and effector proteins.

Kr  
Alun
